# Supplementary material for: Remodeling of Zn2+ homeostasis upon differentiation of mammary epithelial cells
Source: Royal Society of Chemistry journal article supplement (doi:10.1039/c9mt00301k), 2020-01-10
Supplement: c9mt00301k2.xlsx [file c9mt00301k2.xlsx]

## Sheet: Summary
Sheet 1. GO enrichment terms (adj. P <0.05) of all differentially expressed genes
Sheet 2. KEGG enrichment terms (adj. P <0.05) of all differentially expressed genes
Sheet 3. TPMs for all genes under all conditions
Sheet 4. TPMs for all zinc homeostasis genes under all conditions.
Sheet 5. TopHat Mapping Summary
Sheet 6. Lists of differentially expressed genes with DESeq2 analysis (p<0.001) in the comparison of D day1 vs R day1 and D day6 vs R day1.
Sheet 7. Lists of differentially expressed zinc-dependent genes with FC > 1.5 and p < 0.001 in the comparison of D day1 vs R day1 and D day6 vs R day1.
Sheet 8 . GO enrichment anlaysis (adjusted p < 0.05) of differentially expressed zinc-dependent genes

## Sheet: 1. GO_BP Enrichment
	Term	Count	%	PValue	Genes	List Total	Pop Hits	Pop Total	Fold Enrichment	Bonferroni	Benjamini	FDR\			log adj P	log10 adjP
D day1 vs R day1 (upregulated pathways)
GOTERM_BP_DIRECT	GO:0007155~cell adhesion	30	6.60793	3.754e-07	IBSP, OLFM4, ATP1B1, CADM1, IGFBP7, NPNT, CTNND2, POSTN, SCARF2, ISLR, WISP2, LGALS3BP, CTGF, MSLN, GPNMB, BOC, SPP1, KIRREL3, HAPLN2, HAPLN1, CDHR1, EFNB2, TINAGL1, KITL, AMIGO2, AMIGO3, OMD, PGM5, FBLN7, PERP	377	485	18082	2.96678	0.000674367	0.000674367	6.37363683964054E-4\			10.5342	3.1711
GOTERM_BP_DIRECT	GO:0009615~response to virus	12	2.64317	1.29689e-06	LCN2, IFIT3, IFIT1, BST2, ACTA2, OASL2, IFI27L2A, CLU, OAS1A, BCL2L1, OAS2, MX2	377	84	18082	6.85184	0.0023278	0.00116458	0.00220187487317558\			9.74598	2.93383
GOTERM_BP_DIRECT	GO:0002376~immune system process	25	5.50661	1.74744e-06	ORAI1, TNFRSF21, CADM1, VTCN1, CTPS, MASP2, PGLYRP1, HP, OAS2, OASL2, SFTPD, IIGP1, LTF, LBP, MX2, BST2, LGALS9, IFIT3, LCN2, IFIT1, SARM1, SERPINA3G, IRF7, SLPI, C1S2	377	383	18082	3.13074	0.00313523	0.00104617	0.002966817110106046\			9.90067	2.9804
GOTERM_BP_DIRECT	GO:0051216~cartilage development	11	2.42291	7.58057e-06	COL9A1, NOG, LECT1, SULF2, GDF5, CHST11, EDN1, MGP, COL2A1, ZBTB16, COL11A2	377	82	18082	6.43404	0.01353	0.00339979	0.012869743877552686\			8.20034	2.46855
GOTERM_BP_DIRECT	GO:0001501~skeletal system development	11	2.42291	7.86322e-05	HAPLN2, HAPLN1, NOG, COL3A1, FST, EDN1, FAM20C, COL2A1, ZBTB16, COL11A2, CHRD	377	107	18082	4.93076	0.131778	0.0278659	0.13342018811013379\			5.16536	1.55493
D day1 vs R day1 (downregulated pathways)
GOTERM_BP_DIRECT	GO:0007067~mitotic nuclear division	68	10.2564	5.81226e-41	KIF23, BORA, KNTC1, AURKA, PTTG1, AURKB, FAM83D, KIF2C, CDCA8, OIP5, CCSAP, INCENP, CDCA2, MASTL, CCNA1, CCNA2, CDCA5, ASPM, CDCA3, CDK1, KIF11, CCNF, SGOL1, TPX2, NUSAP1, ESPL1, UBE2C, NCAPD2, MAD2L1, TIMELESS, SPAG5, NSL1, BUB1B, HAUS8, NEK2, ANLN, CEP55, SPC24, SPC25, NCAPH, BUB1, SKA3, FBXO5, SKA1, CLASP2, ZWILCH, ERCC6L, CENPN, PSRC1, NUF2, KIF18B, CENPE, SPDL1, BIRC5, NDC80, CDC20, CDC25C, …	558	277	18082	7.95502	1.46527e-37	1.46527e-37	1.0263175082051473E-37\			122.36	36.8341
GOTERM_BP_DIRECT	GO:0007049~cell cycle	94	14.178	1.1248e-38	KIF23, CLSPN, PRC1, DBF4, BORA, KNTC1, AURKA, PTTG1, AURKB, FAM83D, KIF2C, CDCA8, OIP5, FANCI, CCSAP, INCENP, CDCA2, MASTL, CCNA1, CCNA2, CDCA5, ASPM, CDCA3, CDK1, KIF11, SGOL1, CCNF, TPX2, NUSAP1, GPER1, UBE2C, ECT2, MCM5, VASH1, NCAPD2, UHRF1, MAD2L1, TIMELESS, SPAG5, FANCD2, NSL1, BUB1B, HAUS8, MELK, TICRR, NEK2, FOXM1, ANLN, CEP55, MYBL2, SPC24, SPC25, NCAPH, BUB1, SKA3, FBXO5, SKA1, CLASP2, …	558	614	18082	4.96103	2.83563e-35	1.41781e-35	1.9861554185972928E-35\			115.764	34.8484
GOTERM_BP_DIRECT	GO:0051301~cell division	74	11.1614	7.84258e-38	KIF23, KIFC1, PRC1, BORA, KNTC1, AURKA, PTTG1, AURKB, FAM83D, KIF2C, CDCA8, OIP5, CCSAP, INCENP, CDCA2, MASTL, CCNA1, CCNA2, CDCA5, ASPM, CDCA3, KIF14, CDK1, KIF11, CCNF, SGOL1, TPX2, NUSAP1, UBE2C, ECT2, MCM5, NCAPD2, MAD2L1, TIMELESS, SPAG5, NSL1, BUB1B, HAUS8, NEK2, ANLN, CEP55, SPC24, SPC25, NCAPH, BUB1, SKA3, FBXO5, SKA1, CLASP2, ZWILCH, ERCC6L, KIFC5B, PSRC1, NUF2, KIF18B, CENPE, SPDL1, BIR…	558	374	18082	6.41169	1.97711e-34	6.59038e-35	1.3848284066582476E-34\			113.547	34.1811
GOTERM_BP_DIRECT	GO:0007059~chromosome segregation	27	4.0724	8.93273e-19	NEK2, PTTG1, SPC25, KIF2C, OIP5, INCENP, BUB1, CDCA2, SKA3, SKA1, TOP2A, CENPN, KIF11, SGOL1, CENPF, ESPL1, NDC80, BIRC5, CENPE, KNSTRN, BRCA1, RGS14, CENPH, SGOL2A, SPAG5, NSL1, CENPW	558	89	18082	9.83074	2.25194e-15	5.62985e-16	1.5773245692698551E-15\			50.6578	15.2495
GOTERM_BP_DIRECT	GO:0000070~mitotic sister chromatid segregation	13	1.96078	6.44545e-13	NEK2, NUSAP1, KIF18B, ESPL1, NDC80, KNSTRN, CDCA8, MAD2L1, SPAG5, CENPA, PLK1, NSL1, CIT	558	23	18082	18.3159	1.62503e-09	3.25005e-10	1.1382117470759567E-9\			31.5188	9.48811
GOTERM_BP_DIRECT	GO:0007018~microtubule-based movement	17	2.5641	1.56024e-09	KIF14, KIF23, KIFC5B, KIF22, KIFC1, KIF24, KIF11, KIF27, KIF15, KIF18A, KIF18B, CENPE, KIF2C, KIF4, KIF20B, KIF21B, KIF20A	558	78	18082	7.06263	3.93335e-06	6.5556e-07	2.755038674973065E-6\			20.5408	6.18339
GOTERM_BP_DIRECT	GO:0007080~mitotic metaphase plate congression	12	1.80995	3.23074e-09	KIFC5B, CCNB1, KIF14, KIF22, KIF2C, KIFC1, CDCA8, PSRC1, KIF18A, SPDL1, CENPE, CDCA5	558	34	18082	11.4371	8.14467e-06	1.16353e-06	5.704783967441784E-6\			19.7131	5.93422
GOTERM_BP_DIRECT	GO:0007052~mitotic spindle organization	10	1.5083	9.58527e-08	CCNB1, STIL, SPC25, POC1A, WDR62, GPSM2, NDC80, AURKA, CLASP2, AURKB	558	28	18082	11.5732	0.000241615	3.02051e-05	1.692547738407768E-4\			15.0148	4.51992
GOTERM_BP_DIRECT	GO:0000281~mitotic cytokinesis	10	1.5083	1.87914e-07	CKAP2, KIF23, PLK1, CENPA, KIF4, NUSAP1, ANLN, CEP55, RACGAP1, KIF20A	558	30	18082	10.8017	0.000473618	5.26353e-05	3.318137614893857E-4\			14.2136	4.27872
GOTERM_BP_DIRECT	GO:0007051~spindle organization	8	1.20664	2.27741e-07	CEP72, KIF11, SPAG5, AURKA, AURKB, KNSTRN, ASPM, RGS14	558	16	18082	16.2025	0.000573971	5.74119e-05	4.021405113796561E-4\			14.0883	4.241
GOTERM_BP_DIRECT	GO:0000281~mitotic cytokinesis	10	1.5083	1.87914e-07	CKAP2, KIF23, PLK1, CENPA, KIF4, NUSAP1, ANLN, CEP55, RACGAP1, KIF20A	558	30	18082	10.8017	0.000473618	5.26353e-05	3.318137614893857E-4\			14.2136	4.27872
GOTERM_BP_DIRECT	GO:0007051~spindle organization	8	1.20664	2.27741e-07	CEP72, KIF11, SPAG5, AURKA, AURKB, KNSTRN, ASPM, RGS14	558	16	18082	16.2025	0.000573971	5.74119e-05	4.021405113796561E-4\			14.0883	4.241
GOTERM_BP_DIRECT	GO:0006974~cellular response to DNA damage stimulus	34	5.12821	9.12157e-07	CLSPN, RAD51B, BLM, TICRR, FOXM1, EGLN3, PTTG1, MCM10, FANCI, POLM, MASTL, DDIAS, NFATC2, POLQ, TOP2A, RAD51AP1, VAV3, NEIL3, PIF1, POLE, EME1, BRCA2, CDKN3, RAD54L, 2810417H13RIK, BRCA1, UHRF1, EYA1, TIMELESS, FANCD2, PARPBP, RAD54B, UBE2T, BARD1	558	420	18082	2.62326	0.00229691	0.000209028	0.0016106581807506792\			12.224	3.6798
GOTERM_BP_DIRECT	GO:0007420~brain development	21	3.16742	1.2505e-05	DMBX1, SLC38A3, NES, HMX2, FOXJ1, BRCA2, ESR2, AK4, ALK, ADGRG1, DDIT4, SLC17A7, S1PR1, BOK, EPOR, POU3F1, UNC5C, NEURL1A, ACSL3, ASPM, AATK	558	216	18082	3.15049	0.0310335	0.00262366	0.022078760637167516\			8.57421	2.58109
GOTERM_BP_DIRECT	GO:0000910~cytokinesis	9	1.35747	1.35235e-05	KIF23, PRC1, PLK1, INCENP, BRCA2, BIRC5, CIT, ECT2, KIF20A	558	37	18082	7.8823	0.0335183	0.0026191	0.02387681942570552\			8.57672	2.58185
GOTERM_BP_DIRECT	GO:0051310~metaphase plate congression	6	0.904977	1.80301e-05	FAM83D, KIF22, KIF2C, CENPF, NDC80, CENPE	558	12	18082	16.2025	0.0444367	0.00324147	0.03183244079456582\			8.26914	2.48926
GOTERM_BP_DIRECT	GO:0006281~DNA repair	26	3.92157	1.89778e-05	KIF22, CLSPN, RAD51B, BLM, TICRR, FOXM1, PTTG1, ANKLE1, FANCI, POLM, POLQ, RAD51AP1, NEIL3, PIF1, EME1, POLE, BRCA2, RAD54L, 2810417H13RIK, BRCA1, EYA1, UHRF1, FANCD2, PARPBP, UBE2T, BARD1	558	318	18082	2.64947	0.0467171	0.00318449	0.03350539435158506\			8.29472	2.49696
GOTERM_BP_DIRECT	GO:0051988~regulation of attachment of spindle microtubules to kinetochore	5	0.754148	2.89542e-05	NEK2, SPAG5, KNSTRN, RACGAP1, ECT2	558	7	18082	23.1464	0.0703941	0.00455177	0.05111444309927604\			7.77936	2.34182
GOTERM_BP_DIRECT	GO:0008283~cell proliferation	20	3.01659	5.36786e-05	CDK1, MKI67, CSPG4, BRCA2, MAP4K1, AURKB, TACC3, MCM10, GDNF, DDIT4, FAM83D, UHRF1, TNFRSF1B, BOK, VEGFA, TGFBI, CKS2, BUB1, GNG2, MELK	558	220	18082	2.94591	0.12657	0.00792884	0.0947423653200774\			6.97868	2.10079
GOTERM_BP_DIRECT	GO:0000086~G2/M transition of mitotic cell cycle	8	1.20664	5.39264e-05	NES, ABCB1A, PLK1, FOXM1, BIRC5, MASTL, CIT, CDC25C	558	33	18082	7.85576	0.127116	0.00752445	0.09517956822764351\			7.0542	2.12353
GOTERM_BP_DIRECT	GO:0090307~mitotic spindle assembly	8	1.20664	8.04725e-05	KIFC5B, KIFC1, KIF11, NEK2, TPX2, BIRC5, CDC20, MYBL2	558	35	18082	7.40686	0.183623	0.0106211	0.14200168410916092\			6.55693	1.97383
GOTERM_BP_DIRECT	GO:0006260~DNA replication	14	2.11161	0.000108638	RECQL4, BLM, TICRR, DBF4, PIF1, POLE, FAM111A, CHTF18, POLQ, MCM10, ORC1, 2810417H13RIK, BRCA1, MCM5	558	123	18082	3.68838	0.239585	0.0136012	0.191657416289992\			6.20012	1.86642
GOTERM_BP_DIRECT	GO:0006468~protein phosphorylation	36	5.42986	0.000112437	MOK, NEK2, TTK, MAP4K1, RORC, AURKA, AURKB, PRKG2, ULK4, TGFB2, PKN3, SBK2, BUB1, CAMK2B, DYRK3, MLKL, MASTL, AATK, PRKCA, CDK1, TRPM6, TNIK, BMX, NPR1, MYLK2, BIRC5, ALK, CCNB1, PLK4, PLK1, NTRK2, BUB1B, CIT, MAP3K13, MELK, CAMK1D	558	576	18082	2.02531	0.246833	0.0134078	0.1983527057110135\			6.22078	1.87264
GOTERM_BP_DIRECT	GO:0035633~maintenance of blood-brain barrier	4	0.603318	0.000113637	PTGS2, ABCB1A, PTGS1, BDKRB2	558	4	18082	32.405	0.249108	0.012938	0.2004675167384673\			6.27224	1.88813
GOTERM_BP_DIRECT	GO:0034501~protein localization to kinetochore	5	0.754148	0.00016133	CDK1, BUB1B, TTK, SPDL1, AURKB	558	10	18082	16.2025	0.334186	0.0175291	0.28449037877251726\			5.8341	1.75624
D day6 vs R day1 (upregulated pathways)
GOTERM_BP_DIRECT	GO:0009615~response to virus	23	1.84887	1.85191e-09	ODC1, TNF, BST2, ACTA2, CLU, OAS3, RSAD2, TLR3, BCL2L1, OAS2, LCN2, IFIT3, IFIT1, OASL2, DDX60, IFI27L2A, OAS1B, TGTP1, DDX21, OAS1A, MX1, MX2, DCLK1	1062	84	18082	4.66198	7.03353e-06	7.03353e-06	3.42225233707083E-6\			17.1173	5.15283
GOTERM_BP_DIRECT	GO:0002376~immune system process	48	3.85852	1.32724e-06	TNFRSF21, ORAI1, BPIFB1, CADM1, ATG12, CTPS, VTCN1, C3, F2RL1, OAS3, PGLYRP1, IFI30, RSAD2, TLR3, TLR4, HP, OAS2, SEC14L1, SERINC3, ALCAM, RNF125, OASL2, SFTPD, ERAP1, LTF, IIGP1, LBP, C2, MX1, MX2, PIK3CG, DAB2IP, IRGM1, LYN, BST2, CFB, POLR3E, LGALS9, LCN2, IFIT3, IFIT1, SERPINA3G, IRF7, OAS1B, C1RL, SLPI, C1S2, CD14	1062	383	18082	2.13385	0.00502817	0.00251725	0.0024526542365843618\			8.63393	2.59907
GOTERM_BP_DIRECT	GO:0001503~ossification	19	1.52733	1.03203e-05	IBSP, RSAD2, MGP, COL2A1, NPR2, GPM6B, IGF2, SPARC, ATP6V1B1, DDR2, SMO, CHRDL2, CTGF, RASSF2, SORT1, LTF, STC1, FOXC1, SPP1	1062	96	18082	3.3698	0.0384384	0.0129806	0.01906975888120721\			6.2675	1.88671
GOTERM_BP_DIRECT	GO:0006811~ion transport	61	4.90354	1.66105e-05	SLC5A3, SLC9A8, KCNJ15, STEAP4, ATP1B1, LRRC8B, SLC9A4, ATP6AP1, SLC5A1, ANO1, SLC24A3, LTF, MCOLN2, NALCN, SLC4A4, KCNQ1, ATP6V0D2, CLCA2, SLC22A23, SLC22A8, ATP6V1H, CFTR, TCN2, LRRC26, SLC34A2, ATP6V1A, KCNT1, SLC39A14, FXYD2, ORAI1, SLC38A2, CLCNKA, SFXN2, SLC11A2, SLC30A1, SLC39A8, SCNN1G, HTR3A, SCNN1B, SCNN1A, KCNE3, SLC12A2, ATP1A1, KCNK1, SLCO2B1, SLCO1A5, KCNK3, ITPR1, LCN2, ATP6V0E2, A…	1062	584	18082	1.77844	0.0611385	0.0156481	0.030691124071791087\			5.99787	1.80554
GOTERM_BP_DIRECT	GO:0035458~cellular response to interferon-beta	12	0.96463	1.6686e-05	IFIT3, IFIT1, IRGM1, GBP6, IRGM2, IGTP, F830016B08RIK, IIGP1, TLR3, TGTP1, GM4951, GBP3	1062	41	18082	4.98333	0.0614074	0.0125948	0.03083046882936813\			6.31103	1.89981
GOTERM_BP_DIRECT	GO:0007156~homophilic cell adhesion via plasma membrane adhesion molecules	25	2.00965	2.84868e-05	CADM1, PCDHB15, PCDHB14, PCDHGA6, PCDHB12, PCDHB10, PCDHGB1, PCDHB18, PCDHB19, FAT1, PCDHB17, ROBO2, CEACAM1, PCDHB9, PCDHB7, PCDHB8, PCDHB5, PCDHB3, CDHR1, PCDHB4, PLXNB3, PCDHB20, AMIGO2, DSG4, CD200	1062	163	18082	2.61141	0.102547	0.0178708	0.052629262565695445\			5.80626	1.74786
GOTERM_BP_DIRECT	GO:0006814~sodium ion transport	21	1.6881	3.46077e-05	SLC5A3, SLC9A8, FXYD2, ATP1B1, SLC38A2, SLC12A2, SLC9A4, SLC5A1, SLC9A2, ATP1A1, SLC34A2, SLC24A3, SLC5A8, SLC13A2, SCNN1G, NALCN, SCNN1B, SLC4A4, SCNN1A, SLC5A11, SLC9A1	1062	124	18082	2.8835	0.12317	0.0186023	0.06393427165014565\			5.74838	1.73043
GOTERM_BP_DIRECT	GO:0045071~negative regulation of viral genome replication	10	0.803859	6.54679e-05	PLSCR1, TNF, BST2, ISG15, OAS1B, OAS3, LTF, SLPI, RSAD2, MX2	1062	32	18082	5.32074	0.220151	0.0306038	0.1209129137906162\			5.03014	1.51422
GOTERM_BP_DIRECT	GO:0030968~endoplasmic reticulum unfolded protein response	12	0.96463	8.17695e-05	ATF6, HERPUD1, VIMP, WFS1, XBP1, ATF6B, AARS, ERN1, EDEM3, DNAJC3, UGGT1, SERP1	1062	48	18082	4.25659	0.266973	0.0339195	0.15099877543289786\			4.88174	1.46955
D day6 vs R day1 (downregulated pathways)
GOTERM_BP_DIRECT	GO:0007049~cell cycle	143	8.59892	1.07845e-34	ITGB3BP, ZAK, PRC1, CROCC, DBF4, KNTC1, AURKA, AURKB, PTTG1, CDCA8, CDKN2A, CDKN2B, OIP5, CDKN2C, CDKN2D, MIS18A, INCENP, CCSAP, CDCA2, NUP37, CCNA1, CCNA2, CDCA5, MTUS1, ASPM, CDCA3, LIG1, SGOL1, VASH1, ESCO2, NCAPD2, UHRF1, MAD2L1, TIMELESS, SPAG5, CNTROB, PMP22, DSCC1, NEK2, TICRR, NEK1, LRRCC1, ANLN, CHEK1, MYBL2, SPC24, SPC25, NCAPG2, FBXO5, SKA3, SKA1, SPIN2C, DDIAS, HELLS, ERCC6L, CKAP2, M…	1375	614	18082	3.06275	4.58342e-31	4.58342e-31	2.017239011059817E-31\			100.783	30.3388			GO:0006974~cellular response to DNA damage stimulus					2.66816
GOTERM_BP_DIRECT	GO:0007067~mitotic nuclear division	87	5.23151	4.94414e-31	KIF23, ITGB3BP, BORA, KNTC1, AURKA, PTTG1, AURKB, FAM83D, KIF2C, CDCA8, OIP5, MIS18A, CCSAP, INCENP, CDCA2, NUP37, MASTL, CCNA1, CCNA2, CDCA5, ASPM, TUBB3, CDCA3, CDK1, KIF11, DSN1, SGOL1, CCNF, TPX2, NUSAP1, ESPL1, GEM, UBE2C, HMGA2, NCAPD2, MAD2L1, CDK3-PS, APITD1, TIMELESS, SPAG5, NSL1, BUB1B, HAUS8, HAUS5, NEK2, NEK1, HAUS1, LRRCC1, ANLN, CEP55, SPC24, SPC25, NCAPH, NCAPG2, BUB1, SKA3, FBXO5,…	1375	277	18082	4.13032	2.10126e-27	1.05063e-27	9.24798788027698E-28\			89.6208	26.9786			GO:0007420~brain development					2.64444
GOTERM_BP_DIRECT	GO:0051301~cell division	99	5.9531	1.22833e-28	ITGB3BP, KIFC1, PRC1, KNTC1, AURKA, AURKB, PTTG1, CDCA8, OIP5, MIS18A, CCSAP, INCENP, CDCA2, NUP37, CCNA1, CDCA5, CCNA2, ASPM, CDCA3, LIG1, SGOL1, NCAPD2, MAD2L1, TIMELESS, SPAG5, CNTROB, NEK2, NEK1, LRRCC1, ANLN, SPC24, SPC25, NCAPG2, SKA3, FBXO5, SKA1, HELLS, ERCC6L, NUF2, SYCE2, NDC80, CDC20, SPDL1, REEP4, FAM64A, PLK1, KIF23, BORA, FAM83D, CCNE2, KIF2C, CDC45, MASTL, CCNO, CDK14, CDC7, KIF14,…	1375	374	18082	3.48103	5.22038e-25	1.74013e-25	2.2975761098632713E-25\			82.249	24.7594			GO:0000910~cytokinesis					0.940953
GOTERM_BP_DIRECT	GO:0007059~chromosome segregation	32	1.92423	1.64004e-13	NEK2, PTTG1, KIF2C, SPC25, OIP5, INCENP, MIS18A, BUB1, CDCA2, SKA3, NUP37, SKA1, TOP2A, CENPN, KIF11, DSN1, SGOL1, CENPF, CENPE, ESPL1, BIRC5, NDC80, KNSTRN, BRCA1, ESCO2, RGS14, CENPH, SGOL2A, SPAG5, NSL1, CENPW, CENPT	1375	89	18082	4.72829	6.96915e-10	1.74229e-10	3.06721315013192E-10\			32.4183	9.75888			GO:0051310~metaphase plate congression					1.73537
GOTERM_BP_DIRECT	GO:0000070~mitotic sister chromatid segregation	14	0.841852	1.48192e-09	NEK2, DSN1, NUSAP1, KIF18B, ESPL1, NDC80, KNSTRN, CDCA8, MAD2L1, PLK1, SPAG5, CENPA, NSL1, CIT	1375	23	18082	8.00468	6.29812e-06	1.25963e-06	2.771914864307945E-6\			19.5986	5.89976			GO:0006281~DNA repair					1.17466
GOTERM_BP_DIRECT	GO:0000281~mitotic cytokinesis	13	0.78172	8.41131e-07	CKAP2, KIF23, ZFP365, CUL7, CENPA, PLK1, KIF4, NUSAP1, ANLN, CEP55, STMN1, RACGAP1, KIF20A	1375	30	18082	5.69857	0.00356843	0.000595624	0.0015733197248457564\			10.7133	3.22503			GO:0051988~regulation of attachment of spindle microtubules to kinetochore					1.06023
GOTERM_BP_DIRECT	GO:0006260~DNA replication	27	1.62357	1.473e-06	RECQL4, GINS2, BLM, TICRR, DTL, DBF4, PIF1, LIG1, FAM111A, POLE, POLA2, MCM3, MCM10, 2810417H13RIK, BRCA1, MCM5, CDT1, POLD4, CDC45, RFC4, POLD2, CHTF18, LRWD1, CHAF1A, POLQ, ORC1, DSCC1	1375	123	18082	2.88671	0.00624068	0.000893919	0.0027551937266334647\			10.1276	3.0487			GO:0008283~cell proliferation					3.10579
GOTERM_BP_DIRECT	GO:0008283~cell proliferation	39	2.34516	1.47598e-06	TSPAN1, APC2, E2F8, CSPG4, MAP4K1, FGF13, AURKB, MCM10, GDNF, CD74, MIF, FAM83D, ZFP36L1, TNFRSF1B, BOK, TGFBI, BUB1, GNG2, ERCC1, CSF1R, PDK1, CDK1, LTK, MKI67, FOXN1, BRCA2, ITGA2, HGF, HMGA2, TACC3, TACC2, DDIT4, UHRF1, UCN2, DLX5, CKS2, LIPG, ID4, MELK	1375	220	18082	2.33123	0.00625329	0.000783808	0.0027607777700278113\			10.3172	3.10579			GO:0000086~G2/M transition of mitotic cell cycle					2.32506
GOTERM_BP_DIRECT	GO:0042060~wound healing	23	1.38304	1.5625e-06	KRT6A, IL6, CXCL2, VANGL2, TGFB3, ITGA2, GRHL3, IL24, ELK3, GLI3, TIMP1, ALOX15, HPSE, POU2F3, SERPINE1, BNC1, PECAM1, PDGFRB, TGFA, DSP, COL1A1, PLAU, FN1	1375	94	18082	3.21769	0.00661861	0.000737574	0.0029226000643922667\			10.4049	3.13219			GO:0090307~mitotic spindle assembly					0.357268
GOTERM_BP_DIRECT	GO:0007275~multicellular organism development	120	7.21587	2.14221e-06	MEF2C, RBPMS2, STIL, HMX2, PDLIM7, PDGFB, PGF, DZIP1, PRTG, CSPG4, L1CAM, EDIL3, HOXC6, OLFML3, HOXC9, UNC5B, SERPINE2, CCSAP, SPRED2, SPRED3, CREB3L4, UNC5C, CCNA1, TWIST2, SPATA24, WNT10A, VANGL2, FOXN1, NUMBL, NAV1, TIMELESS, RYR1, PDGFRB, STMN1, PRDM1, SSC5D, IGSF9, CATSPERD, SOX2, PAQR7, HOXB13, PAQR8, MDK, EPHB2, TCP11, NRARP, LHX6, NDRG2, HELLS, DMBX1, CSRP2, GAS7, GGN, DLX3, SHOX2, SEMA6B…	1375	1029	18082	1.53359	0.0090631	0.000910028	0.004006925154598218\			10.1018	3.04095			GO:0006260~DNA replication					3.0487
GOTERM_BP_DIRECT	GO:0051276~chromosome organization	14	0.841852	2.38046e-06	NUDT16, CDCA8, BLM, BNC1, BRCA2, CENPW, CENPT, GEM, PTTG1, SMC2, RAD54L, CTC1, ERCC1, SMC4	1375	38	18082	4.84494	0.0100659	0.0009193	0.0044525356102109725\			10.0872	3.03654
GOTERM_BP_DIRECT	GO:0007420~brain development	37	2.22489	6.40985e-06	SLC38A3, HMX2, SHROOM4, KCNAB1, QARS, GLI3, S1PR1, CXCR4, BOK, NDRG4, PAFAH1B3, POU3F1, FAS, UNC5C, NEURL1A, NRG1, ASPM, AATK, DMBX1, NES, ABR, COL4A1, PTPRG, BRCA2, AK4, ESR2, DPYSL2, ALK, DDIT4, SLC17A7, EPHA7, EML1, ARRB2, ID4, EPOR, APAF1, STMN1	1375	216	18082	2.25264	0.0268742	0.00226759	0.011988906233073582\			8.78463	2.64444
GOTERM_BP_DIRECT	GO:0006974~cellular response to DNA damage stimulus	59	3.54781	6.57441e-06	CLSPN, RAD51C, RAD51B, ZFP385A, XRCC2, NUAK1, E2F7, PTTG1, PMAIP1, MCM10, FANCI, FANCG, MASTL, TOP2A, FANCA, GEN1, DTL, LIG1, NEIL3, POLE, NEIL1, RAD51, EYA4, EYA1, UHRF1, TIMELESS, APITD1, FANCD2, RAD18, UBE2T, BLM, TICRR, 3110062M04RIK, FOXM1, NEK1, CHEK1, POLM, DDIAS, POLQ, NFATC2, ERCC1, EXO1, RAD51AP1, PIF1, EME1, BRCA2, ATAD5, CDKN3, 2810417H13RIK, RAD54L, CTC1, BRCA1, CDKN1A, BBC3, PARPBP,…	1375	420	18082	1.84734	0.0275546	0.00214702	0.012296678034307007\			8.86345	2.66816
GOTERM_BP_DIRECT	GO:0030261~chromosome condensation	9	0.541191	8.06215e-06	CDK1, NCAPH, HILS1, NCAPG2, HMGA2, SMC2, TOP2A, SMC4, NCAPD2	1375	16	18082	7.39718	0.0336839	0.00244446	0.015079140167495453\			8.67627	2.61182
GOTERM_BP_DIRECT	GO:0007051~spindle organization	9	0.541191	8.06215e-06	CEP72, KIF11, SPAG5, AURKA, AURKB, KNSTRN, ASPM, RGS14, AUNIP	1375	16	18082	7.39718	0.0336839	0.00244446	0.015079140167495453\			8.67627	2.61182
GOTERM_BP_DIRECT	GO:0030154~cell differentiation	94	5.65244	8.54342e-06	MEF2C, HMX2, PDLIM7, ELF4, PGF, DZIP1, SPINK2, CSPG4, L1CAM, ZEB1, GLI1, ARHGAP22, METRN, SERPINE2, DMKN, SRD5A1, CREB3L4, SEMA3A, CCNA1, ANGPT2, SCX, TWIST2, SPATA24, SOX11, PIK3CD, KRTDAP, FOXN1, PRKCH, GPER1, ECT2, EYA4, SEMA4G, NAV1, SEMA4F, BRDT, KLHL10, STMN1, LRRK2, PMP22, GADD45B, IGSF9, UNC13A, TSNAXIP1, CATSPERD, GLIS2, PAQR7, PAQR8, ELK3, MYBL2, NHS, MDK, MLF1, 1700112E06RIK, TCP11, HS…	1375	780	18082	1.58481	0.0356584	0.00241772	0.015979207337524226\			8.69214	2.61659
GOTERM_BP_DIRECT	GO:0045766~positive regulation of angiogenesis	25	1.50331	1.16683e-05	PGF, MMP9, CXCR2, ITGB2, ITGB3, CCL5, SERPINE1, RRAS, DDAH1, ANGPT2, IL1A, PRKCA, HYAL1, FLT1, LGALS3, HGF, CELA1, VASH2, ECM1, BRCA1, ADM, ETS1, NOTCH4, HSPB1, ENG	1375	121	18082	2.71705	0.0483811	0.00309461	0.021823257986308686\			8.33602	2.50939
GOTERM_BP_DIRECT	GO:0000086~G2/M transition of mitotic cell cycle	12	0.721587	1.8968e-05	CDKN1A, NES, ABCB1A, CDKN2B, PLK1, FOXM1, CHEK1, BIRC5, MASTL, CIT, CDC25C, CDK14	1375	33	18082	4.78202	0.0774511	0.00473083	0.03547363998838149\			7.72369	2.32506
GOTERM_BP_DIRECT	GO:0007155~cell adhesion	64	3.84847	1.92965e-05	NUAK1, ZAN, FERMT1, L1CAM, EDIL3, MEGF10, SDC3, NOV, WISP1, CD44, HPSE, TGFBI, CNTNAP1, SPON2, CDH23, PRKCA, ICAM1, RET, ICAM5, ACKR3, CERCAM, TNFAIP6, DSG1B, DSG1A, CNTN2, LAMC2, HAS2, ADAM12, NCAN, DST, ITGA2B, ACHE, NINJ2, PCDHGC5, ITGB2, ITGB3, COL7A1, FAT4, MSLN, ACAN, COL8A1, COL8A2, THBS3, FN1, FLRT3, HAPLN4, BMX, ITGA2, EMILIN2, COL5A1, LYVE1, CDH15, LAMA3, PKP1, DSG3, STAB1, TENM3, PECAM…	1375	485	18082	1.73533	0.0787379	0.00454579	0.036087761978975674\			7.78125	2.34239
GOTERM_BP_DIRECT	GO:0007052~mitotic spindle organization	11	0.661455	2.28838e-05	CCNB1, STIL, SPC25, POC1A, EML1, WDR62, GPSM2, NDC80, AURKA, STMN1, AURKB	1375	28	18082	5.16629	0.0926773	0.00510572	0.04279528402344468\			7.61367	2.29194
GOTERM_BP_DIRECT	GO:0007080~mitotic metaphase plate congression	12	0.721587	2.61235e-05	KIFC5B, CCNB1, KIF14, KIF22, KIF2C, KIFC1, CDCA8, PSRC1, KIF18A, SPDL1, CENPE, CDCA5	1375	34	18082	4.64137	0.105085	0.00553594	0.04885261024601961\			7.49696	2.25681
GOTERM_BP_DIRECT	GO:0007019~microtubule depolymerization	8	0.481058	3.0701e-05	KIF14, KIF2C, KIF24, STMN2, KIF18A, KIF18B, STMN1, NCKAP5L	1375	14	18082	7.5146	0.122327	0.00619413	0.05741041190380214\			7.33488	2.20802
GOTERM_BP_DIRECT	GO:0007018~microtubule-based movement	18	1.08238	6.22704e-05	KIF14, KIF23, KIFC5B, KIF22, KIFC1, KIF24, KIF11, KIF17, KIF15, KIF18A, KIF18B, CENPE, CASC1, KIF2C, KIF4, KIF20B, KIF21B, KIF20A	1375	78	18082	3.03474	0.232531	0.0119578	0.11641218095420625\			6.3859	1.92235
GOTERM_BP_DIRECT	GO:0030335~positive regulation of cell migration	33	1.98437	6.31641e-05	PDGFB, ITGB3, CCL5, LRRC15, MMP2, S1PR1, CXCR4, FOXF1, RHOD, CSF1R, FN1, PRKCA, RET, FLT1, ARHGEF39, ZFP703, PIK3CD, GPER1, HGF, SNAI1, TNFAIP6, CORO1A, SEMA6B, SEMA6C, SEMA4G, ETS1, SEMA4F, PDGFRB, LAMC2, HAS2, WNT11, COL1A1, PLAU	1375	203	18082	2.13777	0.235441	0.0116041	0.11808211688663084\			6.42922	1.93539
GOTERM_BP_DIRECT	GO:0010628~positive regulation of gene expression	53	3.18701	9.18695e-05	MEF2C, PDGFB, SLC6A4, IQGAP3, TLR2, TGFB3, ANK2, CD44, SERPINE1, MSN, NRG1, SCX, IL1A, CDK1, WNT10A, RET, SOX11, PIK3CD, MYLK2, GRHL3, GPER1, HMGA2, VASH1, MYCN, INHBA, ARRB2, WNT11, PRDM1, HMGB2, VIM, MST1, HFE, ITGB3, IL33, CCL5, CYP26B1, TRP53INP1, POU3F1, NFATC2, ETV4, FN1, NFATC1, MAF, IL6, LMNA, EPHX2, WHRN, BRCA1, NTRK2, DNMT1, ID4, ENG, KLF4	1375	399	18082	1.74681	0.323257	0.0161377	0.17170178914881484\			5.95342	1.79216
GOTERM_BP_DIRECT	GO:0007050~cell cycle arrest	18	1.08238	0.000102621	ZAK, AK1, SOX2, GAS2, CDKN3, VASH1, MLF1, INHBA, CDKN1A, CDKN2A, CDKN2B, CDKN2C, CDKN2D, ERN2, TRP53INP1, DDIAS, PMP22, APBB1	1375	81	18082	2.92234	0.353488	0.0172952	0.19177869270029513\			5.85348	1.76207
GOTERM_BP_DIRECT	GO:0042127~regulation of cell proliferation	35	2.10463	0.000107392	PTGS2, TNFRSF26, FOXM1, PTGS1, CXCL2, IL4RA, CHEK1, GLI3, MIF, TNFRSF1B, SERPINE1, TNFRSF18, PLCD1, NDRG1, NOS2, FAS, FANCA, TCF7, PTGER2, IL6, TBX3, TRNP1, BMX, BRCA2, ESR2, CELA1, ALK, BRCA1, USP17LE, TNFRSF9, DNMT1, PRDM1, KLF4, KCTD11, PLAU	1375	227	18082	2.02762	0.366466	0.0174022	0.20068565529129945\			5.84458	1.75939
GOTERM_BP_DIRECT	GO:0051310~metaphase plate congression	7	0.420926	0.000117924	FAM83D, KIF22, KIF2C, CENPF, NDC80, CENPE, GEM	1375	12	18082	7.67115	0.394202	0.018392	0.22034693898356217\			5.76477	1.73537
GOTERM_BP_DIRECT	GO:0030198~extracellular matrix organization	22	1.32291	0.000123538	PXDN, COL4A1, LGALS3, MMP9, DMP1, NTN4, COL5A3, MMP11, CSGALNACT1, SMOC2, FBLN1, LAMA3, SERPINB5, CRISPLD2, HPSE, FOXF1, FOXF2, TGFBI, LAMC2, ERO1L, APBB1, FN1	1375	114	18082	2.53782	0.408485	0.0185777	0.23082447188529365\			5.75028	1.73101
GOTERM_BP_DIRECT	GO:0006954~inflammatory response	47	2.82622	0.000124987	IL1F8, HMGB2, CCL2, PTGS2, TNFRSF26, PTGS1, CXCL2, TLR2, CSPG4, TAC1, BDKRB1, AFAP1L2, CCL5, IL34, MIF, TNFRSF1B, CYP26B1, TNFRSF18, NOS2, FAS, ADAM8, IL1A, CSF1R, CIITA, HAVCR2, PTGER1, HYAL1, PTGER2, IL6, PIK3CD, CHST2, EPHX2, AXL, GPER1, IL24, CELA1, ECM1, CCL17, IFI202B, GGT5, TNFRSF9, CCR7, LTB4R1, STAB1, KRT16, S100A7A, IGFBP4	1375	344	18082	1.79673	0.412118	0.0181515	0.23352972319452547\			5.78377	1.74109
GOTERM_BP_DIRECT	GO:0002687~positive regulation of leukocyte migration	9	0.541191	0.000132518	CCL2, MMP9, PECAM1, TNFRSF18, TLR2, ITGA2, BDKRB1, ITGB3, ITGA2B	1375	22	18082	5.37977	0.430639	0.0185995	0.24758444313247585\			5.74859	1.7305
GOTERM_BP_DIRECT	GO:0031623~receptor internalization	12	0.721587	0.000138175	CALCR, RAMP3, DNM3, ACHE, ARRB2, ADM, GRIA1, CNTN2, ITGB2, ACKR3, CXCR2, DNM1	1375	40	18082	3.94516	0.444165	0.0187663	0.25813982179042627\			5.73571	1.72662
GOTERM_BP_DIRECT	GO:0007076~mitotic chromosome condensation	7	0.420926	0.000204919	NCAPH, NCAPG, NUSAP1, CDCA5, SMC2, SMC4, NCAPD2	1375	13	18082	7.08106	0.581465	0.0268515	0.3826057912298175\			5.21885	1.57103
GOTERM_BP_DIRECT	GO:0000079~regulation of cyclin-dependent protein serine/threonine kinase activity	8	0.481058	0.000321239	CDKN1A, CDKN2A, BLM, CDKN2B, CDKN2C, CDKN2D, SFN, CCNA2	1375	19	18082	5.53707	0.744744	0.040534	0.5991709616374408\			4.62472	1.39218
GOTERM_BP_DIRECT	GO:0002009~morphogenesis of an epithelium	9	0.541191	0.000364917	FRAS1, KRT6A, KRT6B, KRT17, TIMELESS, SERPINB5, KRT16, HOXB13, CAR9	1375	25	18082	4.7342	0.788002	0.0445979	0.6803746022915003\			4.48688	1.35069

## Sheet: 2. KEGG_Pathway_Enrichment
	Term	Count	%	PValue	Genes	List Total	Pop Hits	Pop Total	Fold Enrichment	Bonferroni	Benjamini	FDR\			log10 adjP
D day1 vs R day1 (upregulated pathways)
KEGG_PATHWAY	mmu04974:Protein digestion and absorption	10	2.20264	5.2e-05	COL9A1, ATP1B1, COL9A2, COL27A1, COL3A1, ACE2, COL2A1, ATP1A2, COL11A2, SLC1A1	152	88	7691	5.74985	0.00999231	0.00999231	0.06481762929412271\			2.00033
KEGG_PATHWAY	mmu04512:ECM-receptor interaction	9	1.98238	0.000312	IBSP, NPNT, COL27A1, COL3A1, ITGA10, COL2A1, TNN, COL11A2, SPP1	152	88	7691	5.17487	0.0585132	0.0296976	0.38853072513407305\			1.52728
D day1 vs R day1 (downregulated pathways)
KEGG_PATHWAY	mmu04110:Cell cycle	19	2.86576	4.78e-08	CDK1, DBF4, TGFB3, TTK, CDC20, ESPL1, PTTG1, CDC25C, MCM5, TGFB2, CCNB1, MAD2L1, CCNB2, PLK1, BUB1, BUB1B, CCNA1, CCNA2, ORC1	242	124	7691	4.86967	1.13e-05	1.13e-05	6.15285e-05			4.94692
	mmu04114:Oocyte meiosis	14	2.11161	4.38e-05	CCNB1, CDK1, MAD2L1, CCNB2, PLK1, SGOL1, BUB1, FBXO5, CDC20, AURKA, CAMK2B, ESPL1, PTTG1, CDC25C	242	112	7691	3.97262	0.0103253	0.00517603	0.0563972			2.286
	mmu05321:Inflammatory bowel disease (IBD)	9	1.35747	0.000461	MAF, IL18R1, IL12RB1, IL18RAP, TGFB3, RORC, IL1A, TGFB2, NFATC1	242	59	7691	4.84795	0.103463	0.0357506	0.591867			1.44672
D day6 vs R day1 (upregulated pathways)
KEGG_PATHWAY	mmu04961:Endocrine and other factor-regulated calcium reabsorption	17	1.36656	4.69e-08	KLK1B21, KLK1B8, FXYD2, KLK1B22, KLK1B9, ATP1B1, KLK1B11, KLK1B3, KLK1B5, KLK1B24, KLK1B1, ATP1A1, KLK1, VDR, GNAQ, ADCY9, PLCB1	477	52	7691	5.27121	1.23e-05	1.23421e-05	6.145029604054386E-5\			4.90861
KEGG_PATHWAY	mmu04614:Renin-angiotensin system	13	1.04502	6.2e-07	KLK1B21, KLK1B8, KLK1B22, KLK1B9, KLK1B11, KLK1B3, AGT, KLK1B5, KLK1B24, ACE2, MME, KLK1B1, KLK1	477	35	7691	5.9888	0.000163	8.15027e-05	8.116179181172356E-4\			4.08883
KEGG_PATHWAY	mmu04960:Aldosterone-regulated sodium reabsorption	12	0.96463	2.03e-05	PIK3CG, FXYD2, ATP1B1, SGK1, ATP1A1, SCNN1G, NEDD4L, SCNN1B, SCNN1A, IRS1, SLC9A3R2, PIK3R1	477	40	7691	4.83711	0.00533778	0.00178244	0.026643943773274614\			2.74899
KEGG_PATHWAY	mmu04974:Protein digestion and absorption	17	1.36656	8.23e-05	FXYD2, ATP1B1, SLC38A2, COL3A1, COL22A1, SLC3A2, MME, COL2A1, ATP1A1, COL9A1, COL9A2, COL27A1, ACE2, KCNQ1, SLC1A1, KCNE3, COL10A1	477	88	7691	3.1148	0.0214052	0.0053948	0.10767370505813112\			2.26802
KEGG_PATHWAY	mmu04976:Bile secretion	15	1.20579	9.16e-05	FXYD2, ATP1B1, ADCY8, SLC5A1, ADCY5, SLC22A8, EPHX1, CFTR, ATP1A1, SLCO1A5, ABCG2, ADCY9, SLC4A4, CAR2, SLC9A1	477	71	7691	3.40641	0.0238163	0.0048093	0.11994203258938185\			2.31792
KEGG_PATHWAY	mmu04971:Gastric acid secretion	15	1.20579	0.000107	KCNJ15, ATP1B1, SLC9A4, ADCY8, GNAI1, ADCY5, CFTR, ATP1A1, ITPR1, GNAQ, ADCY9, PLCB1, KCNQ1, CAR2, SLC9A1	477	72	7691	3.3591	0.0278665	0.00469928	0.1406155210642912\			2.32797
KEGG_PATHWAY	mmu04142:Lysosome	20	1.60772	0.000162	GNPTG, NAGLU, GM2A, ATP6AP1, HEXA, AP3S1, ATP6V1H, AP4S1, CD164, SLC11A2, SLC17A5, NAGA, SUMF1, SORT1, CTSD, ATP6V0A1, CTSC, NEU1, CTNS, ATP6V0D2	477	122	7691	2.64323	0.0416469	0.00605857	0.211573520414976\			2.21763
KEGG_PATHWAY	mmu04972:Pancreatic secretion	17	1.36656	0.000384	FXYD2, ATP1B1, CLCA2, SLC12A2, ADCY8, ADCY5, CFTR, ATP1A1, ITPR1, GNAQ, ADCY9, ATP2A3, PLCB1, SLC4A4, KCNQ1, CAR2, SLC9A1	477	100	7691	2.74103	0.0961245	0.0125535	0.5019224745449913\			1.90124
KEGG_PATHWAY	mmu04978:Mineral absorption	10	0.803859	0.000492	VDR, FXYD2, ATP1B1, SLC30A1, SLC5A1, MT2, MT1, ATP1A1, HEPH, FTH1	477	39	7691	4.13428	0.121511	0.0142915	0.6429485576603944\			1.84492
KEGG_PATHWAY	mmu05323:Rheumatoid arthritis	14	1.1254	0.00144887	TNF, CXCL5, ATP6AP1, ATP6V1H, TLR4, IL15, ATP6V1B1, CXCL12, ATP6V1A, FOS, ATP6V0E2, ATP6V0A1, ANGPT1, ATP6V0D2	477	82	7691	2.75283	0.317047	0.0374151	1.8806944005954285\			1.42695
KEGG_PATHWAY	mmu05160:Hepatitis C	19	1.52733	0.00172319	CLDN8, PIK3CG, CLDN7, OCLN, TNF, CLDN4, OAS3, TLR3, OAS2, CLDN23, IFIT1, IRF7, CD81, OAS1B, CLDN1, OAS1A, OAS1G, PIK3R1, NR1H3	477	136	7691	2.25257	0.364656	0.04	2.233065785120758\			1.39365
D day6 vs R day1 (downregulated pathways)
KEGG_PATHWAY	mmu04110:Cell cycle	32	1.92423	4.8673e-10	E2F2, DBF4, TGFB3, TTK, CHEK1, SFN, PTTG1, CCNE2, CDC45, CDKN2A, CDKN2B, CDKN2C, CDKN2D, BUB1, CCNA1, CCNA2, ORC1, CDC7, CDK1, CDC20, ESPL1, MCM3, CDC25C, MCM5, CDC25B, CCNB1, CDKN1A, CCNB2, MAD2L1, PLK1, BUB1B, GADD45B	556	124	7691	3.56974	1.25576e-07	1.25576e-07	6.35441e-07			6.90109
KEGG_PATHWAY	mmu05200:Pathways in cancer	54	3.24714	6.14377e-06	E2F2, ADCY7, PDGFB, PTGS2, PGF, MMP9, TGFB3, FGF13, LPAR1, GLI3, MMP2, GLI1, CCNE2, PLCB3, CDKN2A, CDKN2B, CXCR4, TGFA, GNG2, NOS2, FAS, PRKCA, PTGER1, WNT10A, PTGER2, RET, PIK3CD, PRKCG, RAD51, PDGFRB, GNB4, LAMC2, WNT11, ITGA2B, TRAF1, APC2, BDKRB1, GNG11, BDKRB2, FLT3L, CSF1R, FN1, TCF7, IL6, COL4A1, ITGA2, BRCA2, BIRC5, HGF, FZD7, CDKN1A, LAMA3, GNG10, CKS2	556	395	7691	1.89106	0.00158384	0.000792234	0.00802058			3.10115
KEGG_PATHWAY	mmu03440:Homologous recombination	11	0.661455	1.41013e-05	POLD4, RAD51C, RAD51B, XRCC2, BLM, EME1, POLD2, BRCA2, RAD54B, RAD54L, RAD51	556	28	7691	5.43429	0.00363154	0.00121198	0.0184081			2.9165
KEGG_PATHWAY	mmu04115:p53 signaling pathway	17	1.02225	1.53887e-05	CDK1, CHEK1, SFN, PMAIP1, GTSE1, CCNE2, CCNB1, CDKN1A, CDKN2A, CCNB2, SERPINB5, BBC3, SERPINE1, FAS, APAF1, GADD45B, IGFBP3	556	67	7691	3.5098	0.00396244	0.000992086	0.0200886			3.00345
KEGG_PATHWAY	mmu04151:PI3K-Akt signaling pathway	48	2.88635	2.21282e-05	CSF3, PDGFB, EFNA1, PGF, EFNA2, EFNA3, IL4RA, TLR2, GNG11, FGF13, LPAR1, ITGB3, CCNE2, PKN3, COL6A3, GYS1, GNG2, CREB3L4, CREB3L3, ANGPT2, THBS3, CSF1R, FN1, PRKCA, IL2RB, IL6, FLT1, COL4A1, PIK3CD, ITGA2, CREB5, HGF, COL5A3, COL5A2, BRCA1, COL5A1, DDIT4, CDKN1A, LAMA3, GNG10, COL1A2, PDGFRB, EPOR, GNB4, LAMC2, COL1A1, IL3RA, ITGA2B	556	351	7691	1.89166	0.00569286	0.00114117	0.0288852			2.94265
KEGG_PATHWAY	mmu04360:Axon guidance	24	1.44317	4.14482e-05	ABLIM2, NGEF, PLXNA3, EFNA1, EFNA2, EFNA3, DPYSL5, NTN4, L1CAM, DPYSL2, EPHB2, EPHA7, EPHB6, SEMA6B, SEMA6C, UNC5B, SEMA4G, SEMA4F, CXCR4, NFATC4, SEMA3A, RHOD, UNC5C, NFATC2	556	129	7691	2.57353	0.0106369	0.00178072	0.0540985			2.7494
KEGG_PATHWAY	mmu03460:Fanconi anemia pathway	13	0.78172	0.000207336	RAD51C, BLM, EME1, BRCA2, BRCA1, RAD51, APITD1, FANCD2, FANCI, FANCG, FANCA, ERCC1, UBE2T	556	51	7691	3.52599	0.0520925	0.00761349	0.270346			2.11842
KEGG_PATHWAY	mmu05146:Amoebiasis	21	1.26278	0.00023546	PRKCA, GNA15, IL6, COL4A1, PIK3CD, SERPINB1A, TLR2, TGFB3, ITGB2, PRKCG, COL5A3, COL5A2, COL5A1, PLCB3, LAMA3, COL1A2, HSPB1, LAMC2, NOS2, COL1A1, FN1	556	117	7691	2.4828	0.0589469	0.0075657	0.306964			2.12115
KEGG_PATHWAY	mmu04512:ECM-receptor interaction	17	1.02225	0.000479864	COL4A1, ITGA2, ITGB3, COL5A3, COL5A2, COL5A1, HMMR, LAMA3, CD44, COL6A3, COL1A2, LAMC2, SV2A, COL1A1, THBS3, FN1, ITGA2B	556	88	7691	2.67223	0.116474	0.0136652	0.624668			1.86439
KEGG_PATHWAY	mmu04640:Hematopoietic cell lineage	16	0.962117	0.000986914	CSF3, FCER2A, IL6, IL4RA, ITGA2, ITGB3, CD1D1, CD44, EPOR, FLT3L, CD5, IL1A, IL3RA, CSF1R, CD7, ITGA2B	556	85	7691	2.60381	0.224889	0.0251532	1.28081			1.59941
KEGG_PATHWAY	mmu05410:Hypertrophic cardiomyopathy (HCM)	15	0.901984	0.00138162	IL6, TNNC1, PRKAB2, CACNB1, LMNA, TGFB3, ITGA2, ITGB3, TPM2, TNNT2, ACE, DES, SGCD, SGCB, ITGA2B	556	79	7691	2.62647	0.300021	0.0319075	1.7888
KEGG_PATHWAY	mmu05205:Proteoglycans in cancer	28	1.6837	0.00138518	MMP9, TLR2, ITGB3, MMP2, TIMP3, ANK1, CD44, ANK2, HPSE, RRAS, CAMK2B, MSN, FAS, GPC1, TWIST2, FN1, PRKCA, WNT10A, PIK3CD, ITGA2, PRKCG, HGF, FZD7, CDKN1A, COL1A2, WNT11, COL1A1, PLAU	556	203	7691	1.90796	0.300665	0.0293624	1.79338
KEGG_PATHWAY	mmu05166:HTLV-I infection	35	2.10463	0.0013899	E2F2, TSPO, ADCY7, APC2, PDGFB, TGFB3, CHEK1, ITGB2, PTTG1, CDKN2A, CDKN2B, CDKN2C, TRP53INP1, RRAS, NFATC4, NFATC2, FOSL1, NFATC1, ICAM1, WNT10A, IL2RB, IL6, POLE, PIK3CD, TNFRSF13C, CDC20, FZD7, POLD4, CDKN1A, MAD2L1, ETS1, POLD2, PDGFRB, BUB1B, WNT11	556	276	7691	1.75415	0.301517	0.0272259	1.79944
KEGG_PATHWAY	mmu05032:Morphine addiction	16	0.962117	0.00251022	PRKCA, ADCY7, PDE4D, PDE3A, PRKCG, GNG11, ARRB2, PDE1B, PDE7A, PDE1C, GNG10, PDE4A, GNG2, GNB4, PDE8A, CACNA1B	556	93	7691	2.37983	0.477145	0.0452616	3.22804
KEGG_PATHWAY	mmu05222:Small cell lung cancer	15	0.901984	0.00252588	TRAF1, E2F2, COL4A1, PTGS2, PIK3CD, ITGA2, CCNE2, LAMA3, CDKN2B, CKS2, LAMC2, NOS2, APAF1, ITGA2B, FN1	556	84	7691	2.47013	0.479259	0.0425676	3.24788
KEGG_PATHWAY	mmu03030:DNA replication	9	0.541191	0.00288107	POLD4, RFC4, LIG1, POLD2, POLE, POLA2, MCM3, MCM5, RNASEH2C	556	35	7691	3.55699	0.524976	0.0454587	3.6967
KEGG_PATHWAY	mmu04015:Rap1 signaling pathway	28	1.6837	0.00299319	PDGFB, ADCY7, RAP1GAP, PGF, EFNA1, EFNA2, EFNA3, SIPA1, ITGB2, FGF13, ITGB3, LPAR1, PLCB3, CALML3, RRAS, ANGPT2, CSF1R, PRKCA, FYB, FLT1, PIK3CD, GRIN1, PRKCG, HGF, RGS14, PDGFRB, ARAP3, ITGA2B	556	214	7691	1.80989	0.538559	0.0444748	3.83797

## Sheet: 3. All_Genes_TPM
Gene	P day1#1	P day1#2	P day1#3	R day1#1	R day1#2	R day1#3	D day1#1	D day1#2	D day1#3	D day6#1	D day6#2	D day6#3
XKR4	0.0103964	0.0110071	0	0.0752151	0.143111	0.102402	0.147822	0.0825256	0.224222	0.0393388	0.0202911	0.034452
RP1	0	0.0164152	0	0	0.0114335	0.00381787	0.00688912	0.00683739	0.00759974	0	0	0
SOX17	0	0	0	0	0	0	0	0	0	0	0	0
MRPL15	25.6757	25.1938	22.8056	26.6946	29.0035	26.6628	23.4803	27.6031	22.2965	23.1314	23.9503	22.6893
LYPLA1	103.419	113.62	90.7209	109.326	112.282	108.442	98.4455	39.5673	96.0718	103.692	97.7414	106.708
TCEA1	303.625	222.253	301.908	140.376	137.825	136.368	152.375	73.8655	151.376	159.578	158.665	159.47
RGS20	13.681	14.4686	13.5872	12.5082	12.2544	11.2394	4.70278	3.03651	5.35	4.49408	5.14962	5.6297
ATP6V1H	85.255	80.1612	79.7753	94.8915	90.0112	86.4971	132.411	115.059	125.657	215.304	203.843	215.697
OPRK1	0	0	0	0	0	0.00790584	0	0	0.00786857	0	0	0.0265984
NPBWR1	0	0	0	0.0105762	0	0.0201586	0	0	0	0	0.00998618	0
RB1CC1	55.2232	42.2534	57.9016	59.1308	64.5362	56.5797	54.1827	16.0746	57.6376	58.6102	60.3111	64.2873
FAM150A	0	0	0	0	0	0	0	0	0	0	0	0
ST18	0.0122644	0	0.0204253	0.0190135	0.0241178	0.0241602	0.0599441	0.0162256	0.0300579	0.0116018	0.0119685	0.0338686
PCMTD1	43.2903	36.2917	45.7631	72.8183	74.0039	65.4282	94.8893	44.0663	103.035	116.651	117.858	122.885
SNTG1	0	0	0	0.00537695	0	0.0102486	0.018493	0.00917709	0.0306009	0.0492141	0.0406158	0.0747076
RRS1	156.288	108.925	157.874	33.8042	34.6988	30.1445	48.5907	39.2445	47.9062	58.5824	60.0201	57.1789
ADHFE1	0.469399	0.395027	0.641429	5.26188	4.95852	5.32289	2.72743	2.02756	3.69311	5.39676	6.48349	6.70065
2610203C22RIK	2.30629	2.85941	2.35845	12.4826	12.7704	12.1651	8.57556	4.09499	9.16265	10.3055	10.6905	11.3299
3110035E14RIK	0	0	0.0263237	0.0245042	0.0233119	0.0350293	0	0	0	0	0	0
MYBL1	20.8461	19.0448	20.7882	7.02759	6.32044	8.22056	3.73869	1.15664	3.67847	7.3429	8.77339	7.77885
VCPIP1	28.5806	21.4092	27.5629	28.0289	31.9615	29.0328	29.5242	9.81305	31.4033	30.354	31.0109	32.037
1700034P13RIK	0.126441	0.107094	0.336922	0.418178	0.124322	0.199265	0.224726	0.111519	0.198326	0.239219	0.049356	0.0558673
SGK3	15.3677	17.5728	14.047	22.3932	21.3895	20.4935	22.4445	9.30289	22.3938	12.1272	11.6183	13.01
MCMDC2	0.0147985	0.0156677	0.0657216	0.0764735	0.0727526	0.116609	0.0789051	0.0130521	0.0580295	0.0279979	0.10109	0.0653864
SNHG6	45.9494	44.1274	48.852	28.0143	30.8498	27.521	43.1432	54.0357	38.4024	29.7681	30.6185	29.3258
SNORD87	8.67933	6.48643	5.66849	2.63834	4.01594	0.502875	4.08334	1.80119	1.50151	2.89778	1.49469	3.9477
TCF24	0	0.0320339	0	0.0104238	0.0297497	0	0.0179253	0	0	0.00954065	0.0196844	0
PPP1R42	0.0786005	0.027739	0	0.0812359	0.23185	0	0.162981	0.0462164	0.128424	0.0743536	0.0511359	0.0578819
COPS5	153.751	144.496	149.576	104.119	109.627	104.641	124.141	105.925	117.246	113.815	108.678	114.039
CSPP1	12.8423	11.4193	12.2931	14.1338	15.1013	12.5125	13.9417	6.65062	14.2399	16.5235	17.6131	17.1091
ARFGEF1	115.515	92.1662	115.78	102.005	111.954	99.6427	104.007	33.7242	107.862	111.963	115.298	123.415
CPA6	0	0	0	0.0201275	0.0574446	0.0191818	0.0173063	0	0	0	0.0380092	0
MIR467E	0	0	0	0	0	0	0	0	0	0	0	0
PREX2	0.00675438	0.0214533	0.018748	0.0279234	0.00996178	0.0565493	0.0540211	0.0268077	0.0430397	0.0255577	0.0263656	0.0484962
A830018L16RIK	0	0	0	0.00470848	0	0	0	0	0	0.00430957	0	0.0050323
MIR6341	0	0	0	0	0	0	0	0	0	0	0	0
GM17644	0.224322	0.324997	0.301493	0.219642	0.232172	0.360499	0.346233	0.0624787	0.497689	0.245708	0.241953	0.326038
SULF1	35.3184	23.684	41.9899	20.2783	20.2387	20.2895	18.2021	5.37098	14.3763	16.2311	13.7349	13.4705
SLCO5A1	0.0443904	0.00469976	0.0689995	0.0871696	0.117845	0.109308	0.0315583	0.00783034	0.043517	0.00839837	0.00866384	0.0098068
PRDM14	0	0	0	0	0.0429782	0.057405	0.012948	0.0385523	0.0142836	0.027566	0	0.0160944
NCOA2	28.6439	27.7141	29.5066	33.764	38.1946	32.3787	36.3503	9.32656	41.8617	46.2629	47.4698	49.3942
TRAM1	152.868	174.908	148.56	158.856	162.058	150.128	162.349	112.692	167.455	178.769	179.346	196.001
LACTB2	73.0586	57.9963	72.0676	62.6786	69.7081	61.2127	73.2332	27.6712	73.0933	107.047	110.509	104.586
XKR9	0	0	0.0435585	0.0202738	0.0578621	0.0386426	0.0348641	0.0173011	0.0384604	0.0742249	0.0191428	0.0216681
GM5523	0.0910377	0.0963847	0.101077	0.18818	0.179024	0.0298898	0.0809015	0	0.0594977	0.0287063	0.118455	0.134081
EYA1	1.31297	1.5558	1.47707	1.87823	2.4195	1.84137	0.649074	0.260748	0.605213	0.485298	0.44124	0.576288
MSC	0	0	0	0	0	0	0	0	0	0	0	0
TRPA1	0.0354498	0.0750638	0.00983974	0.0183192	0.0261418	0	0	0.0390828	0.0608167	0	0	0.0195791
KCNB2	0	0	0	0.0147099	0.00699708	0.00700938	0.012648	0.012553	0.0139527	0.00673183	0.0138892	0.0157215
TERF1	51.5402	44.0384	51.7122	29.1134	29.4494	31.1747	22.4272	17.4985	22.8952	17.2551	18.2557	16.9287
SBSPON	0.068742	0.116447	0.213703	0.667841	0.6759	0.650005	0.549795	0.642673	1.21301	0.286122	0.107333	0.379666
4930444P10RIK	0	0	0.0454954	0	0	0.0403609	0.0546217	0.0180705	0.0200853	0.0387628	0.039988	0
RPL7	3564.3	3690.9	3442.2	3786.22	3581.69	3638.56	3401.53	4523.76	3143.77	2441.8	2436	2432.54
RDH10	98.7564	120.958	100.197	249.342	285.38	275.131	307.024	127.364	215.349	177.264	163.573	158.548
STAU2	32.2247	28.6364	33.3397	29.8057	33.9469	29.2037	27.2659	11.7146	25.8749	29.927	30.5285	28.5054
UBE2W	42.8163	28.191	42.3639	29.0082	27.2538	27.6277	32.4057	21.6625	32.9338	34.6309	33.0546	35.9037
TCEB1	143.804	127.873	140.379	90.361	93.6272	90.3628	94.8865	97.8376	89.2774	93.0344	92.3075	94.6527
D030040B21RIK	0	0	0	0.028011	0.0266481	0.0800849	0	0	0.0531382	0.012819	0.0132242	0
TMEM70	60.1393	43.6024	57.8585	35.7108	34.3378	35.1931	37.1021	31.3019	33.1882	39.6805	36.5709	36.7451
LY96	5.51359	6.23543	5.21726	12.951	16.3868	13.9471	17.8171	14.7545	16.891	23.4113	28.6759	25.1228
JPH1	6.05968	6.19091	4.87794	3.3873	3.72479	3.39072	4.63067	2.20437	5.27784	5.43487	4.88569	4.59261
GDAP1	0.0095963	0.0203199	0.0319635	0.0297542	0.0754838	0.0567124	0.0170557	0	0.07526	0.0272334	0.0187295	0
PI15	1.67538	1.72756	1.642	18.1898	18.9735	12.3469	49.6022	14.3531	67.1145	41.263	37.1672	41.4676
GM16070	0	0	0	0	0.0164079	0	0	0	0	0	0	0
CRISPLD1	0.00943101	0	0.020942	0.243681	0.25037	0.0928926	0.385524	0.199633	0.443782	0.0892144	0.147255	0.145846
CRISP4	0	0	0	0	0	0	0	0	0	0	0	0
DEFB44-PS	0	0	0	0	0	0	0	0	0	0	0	0
DEFB18	0	0	0	0	0	0	0	0	0	0	0	0
DEFB41	0	0	0	0.0832567	0	0	0	0	0	0	0	0
GM15386	0	0	0	0	0	0	0	0	0	0	0	0
TFAP2D	0	0	0	0	0	0.021301	0	0	0	0	0.0211042	0
TFAP2B	20.3953	16.3087	19.7283	20.0402	21.4989	18.7838	23.0816	9.40416	26.7612	23.1739	24.1106	26.4248
PKHD1	0	0	0	0	0	0.00287846	0.00779103	0	0.00286489	0	0.0114075	0.0032281
4930486I03RIK	0	0	0	0	0	0	0	0	0	0	0	0
LINC-MD1	0	0	0	0	0	0	0	0	0	0	0	0
MIR206	0	0	0	0	0	0	0	0	0	0	0	0
MIR133B	0	0	0	0	0	0	0	0	0	0	0	0
IL17A	0	0	0	0	0	0	0	0	0	0	0	0
IL17F	0.0641437	0.0339555	0.071217	0.0331472	0.0315344	0.0315898	0.0570019	0.0848608	0.0628817	0	0.0312979	0
MCM3	177.54	254.052	148.543	38.6415	37.392	48.1084	36.2033	19.5706	27.6561	20.334	16.8248	14.9955
6720483E21RIK	0	0.035714	0.14981	0.418365	0.298507	0.431934	0.0599538	0.148759	0.0661381	0	0.0329187	0
PAQR8	3.99175	3.90947	4.25162	5.09736	5.82425	5.38828	3.18271	1.21377	2.8993	2.23168	2.2772	2.15273
EFHC1	0.342216	0.561589	0.493939	7.90497	7.03245	7.76952	4.16636	3.19939	3.99225	2.78404	2.52138	2.68391
TRAM2	9.07822	12.9783	9.05326	22.2767	23.4377	22.1403	19.7822	3.11645	20.6237	24.8632	24.6942	23.9889
TMEM14A	1.73383	1.45076	1.55244	7.8904	5.85671	6.33526	5.64125	5.27824	4.87983	4.52362	3.73875	4.29376
GSTA3	0.0703987	0.099378	0.0521078	0.55782	0.62297	0.878314	0.854993	1.07624	1.12722	5.88255	4.4426	4.45842
GM4956	0	0	0	0	0	0	0	0	0	0	0	0
KHDC1A	0	0	0	0	0	0	0	0	0	0	0.0378143	0.128409
KHDC1C	0	0	0	0	0	0	0	0	0	0	0	0
KHDC1B	0	0	0	0	0	0	0	0	0	0	0	0
KCNQ5	0.0216508	0.0343836	0.0480766	0.0167825	0.010644	0.0266567	0.0384804	0.00954785	0.0371435	0.0153607	0.0211283	0.0418524
RIMS1	0	0	0	0	0	0	0	0	0	0	0	0
4933415F23RIK	0	0	0	0.0219367	0.0208694	0.0209061	0	0	0	0	0	0
MIR30A	0	0	0	0	0	0	0	0	0	0	0	0
MIR30C-2	0	0	0	0	0	0	0.399692	0	0	0	0.438916	0
OGFRL1	8.01785	9.8843	7.82822	12.2446	12.9372	12.0073	11.2491	10.6969	11.3085	15.1619	15.5194	14.9994
B3GAT2	0.589916	0.36739	0.943923	2.25946	2.87456	2.46091	1.41081	0.849309	1.33522	0.065652	0.0592613	0.153324
SMAP1	84.4576	78.175	84.4463	87.0123	93.9982	86.13	90.0603	71.3721	90.3411	88.8049	89.9179	87.78
SDHAF4	23.6766	26.7464	21.3822	50.2874	43.8864	49.989	59.6482	68.8921	51.1415	42.5978	37.6428	40.2938
FAM135A	48.7053	35.2494	52.487	29.749	33.1725	30.5839	27.8218	7.18791	28.5956	26.2615	24.4349	27.4196
COL9A1	2.47129	2.41369	2.66281	22.7329	21.6447	21.2157	55.6976	45.9414	70.5792	128.146	106.798	109.011
COL19A1	0	0	0	0.0148159	0	0.00352995	0	0.00632176	0.00351331	0.00339018	0.00349734	0.00791744
LMBRD1	25.736	19.4954	28.3639	33.732	33.2205	31.4569	36.1706	19.6397	38.6515	44.8464	44.9101	51.1908
ADGRB3	0	0	0	0	0	0	0	0	0	0	0.00667674	0.00755756
GM20172	0	0	0	0	0	0	0	0	0	0	0	0
4931408C20RIK	0	0	0	0	0.0171542	0.00859219	0	0	0	0.00825197	0	0
GM597	0	0	0	0	0.025779	0	0	0	0.0128513	0	0	0
MIR6342	0	0	0	0	0	0	0	0	0	0	0	0
PHF3	90.7914	79.1581	90.8117	77.3873	87.2703	75.6166	65.8916	24.0495	69.7003	63.9724	71.8703	70.8923
PTP4A1	10.367	12.6809	11.5712	17.5992	18.4433	16.0784	18.7752	21.6766	17.7966	13.9876	14.5279	15.5854
GM13363	0	0	0	0	0	0	0	0	0	0	0	0
4931428L18RIK	0	0	0	0	0	0	0.0306893	0	0	0	0	0
LGSN	0	0	0	0	0	0	0	0	0	0	0	0
PIH1D3	0	0	0	0	0	0	0	0	0	0	0	0
GM4850	0.0413355	0	0	0.0854429	0	0.0407142	0.0367332	0	0	0	0	0
KHDRBS2	0.111201	0.0882994	0.15433	0.0574649	0.0273344	0.0821474	0.0988201	0	0.0817601	0	0.0271295	0
GM9839	0	0	0	0.0271728	0.0258507	0	0.0467281	0	0.0257741	0	0	0
GM5415	0	0	0	0.0104182	0.0198226	0	0.00895788	0.0266718	0	0	0	0
PRIM2	70.6475	73.6026	67.9513	26.7957	28.6878	30.5461	21.7484	14.4688	19.0247	17.6345	16.5686	16.6636
1700001G17RIK	0.467477	0.764897	0.235921	0.527074	0.919285	0.837183	1.20852	0.712169	0.874898	0.804033	0.912393	0.375549
RAB23	34.421	29.5161	33.5331	16.7868	18.9173	16.081	18.1451	9.2755	18.3907	12.8795	12.9826	13.0677
BAG2	40.1953	37.311	38.9423	34.9168	36.0832	37.7459	39.1791	25.501	35.262	44.1671	46.3554	44.469
ZFP451	37.9003	27.4311	38.4045	22.9036	23.9393	21.6638	23.4794	10.1478	24.8002	23.8618	24.9339	24.7284
GM15455	0.876871	0.649861	0.709313	0.466083	0.480355	0.530554	0.50094	0.320404	0.540333	0.402896	0.281163	0.38744
BEND6	1.94508	1.22163	2.21447	1.14144	1.34522	1.59112	0.673826	0.421613	0.646376	0.343047	0.209117	0.327745
DST	51.4026	33.0493	52.8792	40.194	53.4547	44.2817	26.122	7.36614	29.9486	15.3162	18.8517	19.867
MIR6896	0	0	0	0	0	0	0	0	0	0	0	0
MIR5103	0	0	0	0	0	0	0	0	0	0	0	0
CCDC115	62.3547	55.2722	61.727	54.2312	50.5031	57.0741	45.4678	50.6768	47.4208	50.2446	53.6708	49.1003
IMP4	116.819	97.9271	114.37	44.5512	51.0881	46.0154	49.3535	38.6114	50.6402	53.9983	58.033	55.149
PTPN18	3.81889	3.96691	5.36002	4.44341	5.59692	5.65407	8.13207	8.66414	7.8878	59.1868	61.503	55.0247
PRSS39	0	0	0	0	0	0	0	0	0	0	0	0
CFC1	0	0	0	0	0	0	0	0.0321021	0	0	0	0
PRSS40	0	0	0	0	0	0	0	0	0	0	0	0
AMER3	0	0	0	0	0.00852789	0	0	0	0.0170052	0	0.0253918	0
AA619741	0	0	0	0	0	0	0	0	0	0	0	0
ARHGEF4	2.74237	1.8865	2.39563	9.48129	8.03448	11.2159	4.30501	4.22357	5.25401	1.7119	2.37733	3.18301
FAM168B	196.601	156.274	198.711	124.268	127.757	118.422	140.78	73.315	143.52	147.136	137.591	144.151
PLEKHB2	45.7388	52.2431	46.472	69.4985	65.4377	66.4849	68.3883	45.8733	67.079	76.5562	74.9986	79.8334
HS6ST1	345.999	231.372	364.686	122.885	130.191	126.718	120.972	79.618	120.224	171.085	168.513	173.092
UGGT1	78.8292	69.6062	76.2559	52.9598	60.1461	52.013	74.4588	38.5294	80.2154	105.508	109.468	113.754
MIR6897	0	0	0	0	0	0	0	0	0	0	0	0
NEURL3	0.0438799	0.0309715	0.0487187	0.166288	0.100671	0.31695	0.103985	0.0903035	0.100372	0.0276727	0.0285474	0.0161567
ARID5A	66.328	49.858	66.3952	13.6133	14.7526	15.729	4.62412	3.51394	4.83263	7.80293	7.98594	7.7934
KANSL3	128.696	87.2649	137.571	60.0239	60.6564	60.1885	54.7713	33.908	54.9722	70.8041	69.2074	71.106
MIR6898	0	0	0	0	0	0	0	0	0	0	0	1.08397
FER1L5	0	0	0	0.0432624	0.0235185	0	0	0	0.0117244	0	0.00583554	0.0132108
LMAN2L	41.3634	29.7885	41.4566	48.138	50.9881	48.8365	41.1189	41.0347	42.181	47.1759	45.9826	45.9718
CNNM4	115.181	92.4391	111.605	56.8667	59.0614	60.4322	24.1364	16.2247	27.192	18.1114	17.3241	18.4801
CNNM3	11.7854	14.6582	11.4097	15.854	15.6732	15.8205	15.4874	11.0127	16.4681	14.1117	13.4342	14.1953
ANKRD23	2.51355	2.80448	2.16818	6.91422	6.97703	6.43701	5.58423	5.5423	7.3544	4.20677	4.32088	4.57054
ANKRD39	10.4288	9.20484	10.6628	9.44483	10.2332	10.4804	9.83162	8.02265	9.00012	8.02433	7.18387	7.54743
SEMA4C	7.74626	12.2646	8.52228	40.5212	37.4677	40.3601	34.857	27.9029	38.3663	22.6993	22.4719	23.871
FAM178B	0.0441191	0.0467104	0.130625	1.32235	0.968813	1.20228	0.62731	1.07658	0.6776	0.431264	0.301381	0.487343
COX5B	591.808	593.527	556.071	680.001	720.753	721.169	580.909	831	522.493	637.089	638.241	596.142
ACTR1B	182.555	176.676	184.025	138.555	135.552	142.759	146.517	108.116	143.727	148.188	138.725	149.531
4933424G06RIK	0.0670464	0.0709843	0	0.173236	0.0988842	0.165097	0.148954	0.088701	0.164318	0.0951356	0.130857	0.0740601
ZAP70	0	0	0	0.0430511	0.0273043	0.0410284	0	0	0	0	0.0135498	0
TMEM131	80.454	70.036	80.4984	68.8994	84.2513	71.0043	66.2356	29.317	72.4853	71.6969	81.4406	79.9412
CNGA3	0	0.0104383	0.0109464	0.0815185	0.0387761	0.0194221	0.017523	0.0173914	0.0193306	0	0.0384854	0
INPP4A	5.2569	4.9371	5.88454	10.0519	10.5552	10.2707	9.88518	5.56477	11.1165	12.7079	11.9403	13.1339
COA5	68.5569	70.4085	66.8737	89.54	90.5121	83.1362	89.5078	49.3877	92.392	106.727	103.552	104.419
UNC50	34.1685	41.8976	32.6484	51.547	46.4607	51.4179	72.3318	63.2929	68.8811	77.1736	69.0379	73.86
MGAT4A	13.8857	15.4515	13.9013	29.1173	32.4855	27.8672	38.4128	20.1191	43.79	49.7077	47.8569	55.6265
4930594C11RIK	0.0411404	0.0145189	0.0456771	0.0283466	0.0134837	0.0135074	0.0731197	0.0241902	0.120993	0.0389175	0.0267651	0
2010300C02RIK	0.0866329	0.220131	0.125042	1.50423	1.44808	1.57862	3.33355	2.0172	3.29523	16.5871	15.1331	14.6701
TSGA10	1.49966	1.38688	1.68509	3.48271	3.23331	2.95424	2.28002	0.669308	2.45321	2.0254	2.0277	1.98585
LIPT1	22.717	14.6365	20.3125	11.4506	10.4156	10.3621	12.1126	10.7788	11.6947	11.2389	11.1437	12.3454
MITD1	47.8944	43.6123	44.6773	46.7361	47.4847	42.6327	54.4453	44.1401	50.7493	40.712	47.3987	37.8618
MRPL30	232.917	248.333	222.178	232.533	232.131	237.225	188.812	234.363	174.467	145.078	148.703	147.545
LYG2	0	0.0156005	0	0	0.0144881	0	0.0523777	0	0.0144451	0	0.0287589	0
LYG1	0.520786	1.55387	0.473084	0.880768	0.325855	0.746121	0.631093	0.66811	0.742603	0.313502	0.0462017	0.209187
TXNDC9	57.9122	50.4521	62.6373	53.6774	53.1914	51.034	56.7093	58.3135	55.137	57.4892	60.5979	58.6766
EIF5B	92.4431	95.0921	86.8418	69.1956	80.0646	64.3742	85.7891	85.9397	85.7079	79.5963	87.5644	83.1338
REV1	37.5058	28.8219	36.6813	26.1568	27.804	25.1811	26.2244	13.8855	26.1921	25.3412	25.0609	25.6644
AFF3	0.52104	0.524061	0.468582	2.64409	2.9509	2.21193	1.90304	1.09833	2.73272	0.906913	0.833886	0.909363
LONRF2	0	0	0	0.00769104	0.00731682	0.0146594	0	0	0.00729512	0	0	0.00821998
CHST10	0.472409	0.538629	0.363117	0.851306	0.726514	0.656205	0.516691	0.309823	0.47499	0.343757	0.425548	0.388026
NMS	0	0	0	0.0390084	0	0	0	0	0	0	0.0368321	0
PDCL3	112.611	107.807	116.669	102.082	102.558	95.5186	100.506	83.4222	97.9992	98.3145	100.125	97.5316
MIR6349	0	0	0	0	0	0	0	0	0	0	0	0
NPAS2	0.0271153	0.0287079	0.0200702	0.0373659	0.0266609	0	0.0321284	0.0398588	0.0620243	0.111151	0.149946	0.109823
RPL31	721.571	799.642	661.742	755.269	752.407	732.138	750.555	1106.06	691.354	541.252	562.745	527.872
TBC1D8	3.13207	3.87471	3.19397	4.6797	5.43948	4.39277	4.37923	2.95762	5.64029	7.0609	7.10967	7.57753
CNOT11	46.5754	44.1815	44.1329	32.1284	31.5507	28.9616	35.589	32.5221	38.6517	39.1823	37.556	39.0833
SNORD89	4.01922	5.10634	2.23121	3.32318	1.58074	5.14645	1.78586	1.41796	3.54613	3.80205	3.13778	3.10776
RNF149	52.3713	47.9535	52.7695	53.8867	54.2713	52.8684	65.893	41.5772	62.0535	123.663	121.15	121.512
CREG2	0	0	0.0144669	0	0	0.0064171	0.00578964	0	0.00638685	0	0.00635781	0.0143931
RFX8	0.661161	0.839992	0.671149	6.24758	5.92502	6.64248	3.02167	3.36552	3.33336	0.125087	0.184345	0.229531
GM3646	0	0	0	0	0	0	0	0	0	0	0	0
1700066B17RIK	0	0	0	0	0	0	0	0	0	0	0	0
MAP4K4	193.393	186.513	199.644	189.988	198.746	188.051	147.807	76.6618	149.526	149.34	148.093	153.135
GM16894	0	0.0466196	0	0.0910195	0.0865909	0.0433715	0	0	0.0431671	0	0	0
IL1R2	0.0562212	0.0892849	0	0.145266	0.442232	0.0830642	0.0249808	0.123966	0.0826726	0.0797752	0.0822968	0.186307
IL1R1	19.2692	12.5044	21.2691	10.9891	11.1996	10.9384	10.329	3.47449	10.5705	10.4059	11.6209	11.8858
IL1RL2	0	0	0	0.0200243	0	0	0	0	0	0	0	0.0214015
IL1RL1	0.628257	0.417133	0.863054	0.335667	0.340274	0.209768	0.123017	0.00939177	0.140926	0.0151096	0.0155872	0.0176435
IL18R1	0.308188	0.476883	0.561513	0.212347	0.248634	0.280205	0.0842689	0.0696967	0.0619742	0.082228	0.0925387	0.192036
IL18RAP	14.0644	13.9741	16.3789	2.38006	2.17308	2.70209	0.590586	0.293075	0.356055	0.577501	0.678709	0.699958
SLC9A4	0.00988504	0.0418625	0.0109751	0.17368	0.233265	0.16552	2.68804	1.18571	2.17069	5.05886	3.90684	4.37856
SLC9A2	0.0216322	0.0343541	0.0480353	0.223575	0.542377	0.276992	2.45102	0.925346	1.73894	3.01835	2.31157	2.1864
MFSD9	4.5308	6.26898	4.37833	14.234	13.4117	14.6395	15.1893	9.9374	13.8185	10.7036	10.656	10.7245
TMEM182	0.0344714	0.036496	0.0382726	0.0712544	0.135575	0.0339533	0.0919	0	0.10138	0.0978265	0.0672791	0.0380774
4930448I06RIK	0	0	0	0	0	0	0	0	0	0	0	0
PANTR1	0	0	0	0	0	0	0	0	0	0	0	0
POU3F3	0	0	0	0	0	0	0	0	0	0	0	0
2900092D14RIK	0	0	0	0	0	0	0	0	0	0	0	0
PANTR2	0	0	0	0	0	0	0	0	0	0	0	0
DALIR	0	0	0	0	0	0	0	0	0.0170287	0	0	0
MRPS9	98.0859	91.9794	92.6732	82.6352	80.9967	85.3612	63.4336	67.5833	63.034	50.4984	51.3411	48.4383
GPR45	0.00978773	0.0207252	0.0217341	0.0202318	0	0	0	0	0.00959517	0.0185178	0	0.0432465
TGFBRAP1	40.0933	38.2228	39.4776	29.5147	32.177	27.8525	34.2046	17.5214	37.024	40.0115	41.9286	41.4163
AI597479	39.9773	30.6737	41.4008	30.5986	29.9802	30.3989	31.321	15.2392	30.5555	27.0448	24.8922	27.8742
FHL2	100.163	70.7447	96.3	38.0927	35.1096	43.8032	29.5901	18.2407	20.6278	57.2425	36.6271	37.1042
NCK2	65.2822	65.7147	67.9765	98.4416	95.3251	102.037	86.3732	59.1511	85.6997	87.9122	85.2038	89.3008
1500015O10RIK	0	0	0	0.0439723	0.0418328	0.0419063	0	0.112574	0	0.0804939	0	0
UXS1	138.529	132.129	125.541	56.9171	58.236	54.2723	75.5484	57.9375	76.9778	89.1926	90.815	89.8429
TPP2	117.039	103.565	116.024	91.9785	95.7413	92.0194	81.8446	33.5012	79.3726	78.5588	76.7039	77.5231
METTL21C	0	0	0	0.0359552	0	0	0.0618308	0.0306832	0.0682087	0	0	0
TEX30	49.3388	47.0193	45.9591	11.2666	11.1296	12.1493	12.6865	11.1161	10.7745	12.4311	12.1828	13.1962
KDELC1	37.6993	32.461	38.1023	30.2096	31.2173	28.1978	42.9934	29.8665	38.7904	31.5102	30.9515	31.8024
BIVM	41.2614	34.8135	44.5075	37.4947	39.2488	36.7126	31.4493	17.1696	32.4427	25.3808	25.2332	25.5235
ERCC5	29.8476	19.8801	31.5385	27.8785	28.032	25.8169	29.5804	19.0708	28.9741	31.3365	32.1155	32.3039
METTL21E	0	0	0	0.0122752	0.0116779	0	0.327192	0.366636	0.430802	4.39298	2.66579	3.18802
GULP1	1.45994	1.10214	1.35312	5.4976	6.56572	4.82666	14.5533	4.83706	15.0215	28.2936	25.5952	25.6343
4930521E06RIK	0	0	0	0	0	0	0	0	0	0	0	0
COL3A1	0.00679019	0.00718901	0.0301559	0.877233	0.954725	0.642061	3.53602	1.95836	4.45327	13.0265	15.8303	21.3465
COL5A2	0.325547	0.278153	0.361446	2.98094	3.375	2.81276	1.64952	0.750564	1.6741	0.513263	0.62981	0.630882
WDR75	152.178	105.696	152.306	41.514	46.0646	37.8824	62.2638	39.4455	56.2225	55.9213	51.3653	51.8944
SLC40A1	2.59323	2.89938	2.27108	78.7417	73.0531	74.0953	68.4098	42.1553	76.6388	73.0223	64.4771	71.8225
STK-PS2	0	0	0	0	0	0	0	0	0.0212675	0	0.0105854	0
DNAH7B	0.0306711	0.0194835	0.0442692	0.0982683	0.120628	0.0725042	0.0245305	0.00811544	0.0210474	0.0319153	0.0239448	0.0271036
SLC39A10	16.5866	24.4061	14.4839	22.3297	23.9987	22.2106	23.4227	7.97955	23.8828	13.1402	13.2657	14.9989
MIR6350	0	0	0	0	0	0	0	0	0	0	0	0
TMEFF2	0.0452598	0.0119795	0	0.0935547	0.066752	0.100304	0.0402206	0.0399185	0.0110923	0.0428144	0.0110419	0.0249972
9330175M20RIK	0	0	0	0	0	0	0	0	0	0	0	0.016353
SDPR	0.0742009	0.0130932	0.0411916	0.0766888	0.0607978	0.0609047	0.0109899	0.0109074	0.0606176	0.503041	0.398257	0.764988
NABP1	19.0368	15.8843	19.4362	30.5857	28.9928	32.4399	24.4175	11.0956	21.4681	58.961	61.1755	50.2617
MYO1B	61.4374	59.5364	64.3688	79.8103	86.2927	80.4423	94.4966	41.3475	90.1269	68.3665	60.67	54.204
STAT4	0	0	0	0.235449	0.212204	0.165338	0.213101	0.126901	0.246837	0.181475	0.198912	0.225153
STAT1	18.1638	15.8624	19.1329	50.6902	51.7956	46.0018	75.5543	43.4505	75.845	64.2253	77.6754	59.1475
GLS	114.588	105.259	106.73	80.3739	78.9341	79.8482	73.3456	31.8755	78.7	67.7934	60.9197	68.4938
NAB1	294.084	223.606	328.839	156.167	173.18	157.233	122.043	51.8037	114.643	86.8897	92.7449	89.8224
TMEM194B	13.1353	13.6828	12.7917	13.1615	14.0425	14.5496	8.94255	6.84309	9.363	4.08569	3.75859	3.99622
MFSD6	112.997	86.6253	116.641	96.9409	108.911	87.8994	120.02	63.6933	135.634	142.42	153.451	157.353
INPP1	32.1796	36.0989	30.8098	38.0789	37.5035	37.8001	28.7481	17.8444	30.9828	27.5197	26.7892	27.9238
HIBCH	31.7721	32.2532	29.9339	45.4865	45.7149	43.9172	41.2978	34.8864	41.5801	43.7932	38.6648	41.194
1700019D03RIK	2.85393	2.11029	1.55917	4.3542	4.6323	4.10501	3.54259	1.23859	4.75179	6.94216	6.36586	7.35579
MSTN	0	0	0	0	0	0.013875	0	0	0.0138096	0	0	0
1700019A02RIK	0	0	0	0	0	0	0	0	0	0	0	0
PMS1	20.025	15.4322	17.7755	8.87909	9.37882	8.74439	7.63451	3.7611	6.91853	6.10988	5.48776	5.89494
ORMDL1	44.207	36.1427	42.3331	30.4383	28.4945	30.5806	28.5908	22.2748	26.7648	33.5709	31.057	33.9786
OSGEPL1	19.7926	17.401	19.95	19.9348	17.9155	19.973	13.4503	11.3298	13.6203	11.5093	12.9714	11.446
ASNSD1	68.0268	59.8029	68.1421	70.4676	69.8075	70.8749	57.3455	48.1818	54.646	37.0565	37.6993	37.4092
DNAH7A	0.00615721	0	0	0.00636365	0.00302701	0.00303233	0	0	0.00603607	0	0.00300432	0.00340066
STK17B	51.7841	35.082	55.9973	40.2267	38.9153	41.1293	32.048	14.6788	29.4333	25.0437	24.0357	23.158
HECW2	0.116669	0.0952876	0.136936	0.161922	0.226149	0.22983	0.379168	0.13524	0.37253	0.359474	0.335054	0.272475
MIR7681	0	0	0	0	0	0	0	0	0	0	0	0
CCDC150	0.406884	0.50433	0.39666	0.676944	0.663522	0.752662	0.0881905	0.12254	0.116745	0.150204	0.135583	0.0876971
GTF3C3	51.6105	45.4572	50.2524	44.0501	44.3668	42.4387	40.4677	14.6262	40.4884	35.0852	33.998	35.1222
PGAP1	6.84973	6.33324	6.55431	3.65412	3.96441	3.73218	2.40246	0.796906	2.59776	3.79386	3.44329	3.81469
ANKRD44	7.22385	7.19863	6.47648	6.90643	7.3085	6.04859	4.23231	1.56299	4.97652	2.28755	2.11366	2.06625
SF3B1	218.744	203.093	215.717	193.345	195.962	195.104	180.268	93.6687	181.25	172.583	170.273	180.063
COQ10B	82.0579	54.6331	88.2504	29.7418	28.2089	26.8198	38.5144	28.8803	37.7212	67.8902	61.888	69.4263
HSPD1	978.959	783.578	920.401	337.445	353.634	321.718	383.713	246.5	357.334	525.99	534.442	512.283
HSPE1	430.788	441.611	415.863	241.606	230.624	226.232	296.965	407.327	255.403	295.035	303.065	261.971
MOB4	83.4489	65.6187	81.2663	86.2055	84.2457	73.0034	103.704	86.4415	104.231	123.013	118.735	120.886
RFTN2	0.0719435	0.0761691	0.102699	0.414268	0.474954	0.232833	0.2192	0.235683	0.382867	0.525006	0.411215	0.442759
MARS2	16.5044	14.9895	15.3262	14.7004	13.2375	13.3641	19.5131	8.09348	18.5058	30.6425	27.3255	27.0351
BOLL	0	0	0	0	0	0	0	0	0	0	0	0
PLCL1	0.213255	0.079328	0.31996	0.107224	0.0850057	0.102186	0.153657	0.0559179	0.118655	0.185375	0.12374	0.127331
9130227L01RIK	0	0	0	0	0	0	0	0	0	0	0	0
1700003I22RIK	0	0	0	0	0	0	0	0	0	0	0	0
HSFY2	0	0	0	0	0	0	0	0	0	0	0	0
SATB2	7.56184	5.59965	7.17365	5.2078	5.87501	4.66744	5.55123	1.83441	5.84358	5.14521	6.0681	6.1265
9130024F11RIK	0.526983	0.536476	0.753872	1.01599	1.0363	0.878413	1.08071	0.983213	1.2518	0.977845	0.998864	1.14183
BC055402	0	0	0	0.0236364	0	0	0	0	0	0	0	0
4930558J18RIK	4.63973	4.09353	4.12927	1.12271	1.04998	1.70468	0.229063	0.0974327	0.198543	0.243835	0.287477	0.325402
1700066M21RIK	34.7401	22.1082	33.8839	6.9862	6.97982	7.68511	6.06277	3.35769	6.77437	8.17713	7.0501	7.5777
TYW5	27.324	22.6424	26.5449	15.4234	17.0496	15.294	17.9311	15.317	15.84	14.7381	15.9219	15.5265
9430016H08RIK	45.3082	34.7469	44.4161	26.0512	26.5219	26.4843	30.2294	32.6933	28.959	34.1209	32.7786	28.9768
SPATS2L	0.420304	0.375769	0.362951	0.318557	0.339792	0.285191	0.340306	0.181232	0.329628	0.132531	0.209638	0.196026
KCTD18	18.5793	15.5725	19.1239	16.9162	16.9359	14.2969	16.2281	12.5948	15.937	11.8739	11.062	11.8342
SGOL2A	53.7551	45.1547	53.5875	16.7191	17.4832	24.4192	4.46953	1.03362	3.0021	3.18724	2.36898	1.98031
AOX1	3.49182	3.9525	3.17808	3.51979	3.61133	3.10814	2.19128	0.859285	2.05387	3.13188	3.48328	3.50472
AOX3	0	0	0.00962082	0.0268675	0.0170401	0.00853504	0.015401	0.0152853	0.0084948	0.0245912	0.0253686	0.00957175
AOX4	0	0	0	0.43194	0.478166	0.321832	0.351137	0.234568	0.36501	0.064693	0.163137	0.193052
AOX2	0.0632841	0.0586259	0.052697	0.114461	0.0933354	0.0701246	0.0562381	0.0279079	0.0542842	0.0673479	0.0694767	0.113594
BZW1	399.29	418.93	371.717	250.962	254.932	237.818	279.638	139.64	263.131	253.77	247.216	257.6
CLK1	48.4248	37.9142	48.7659	90.1959	85.4825	82.7526	80.6736	48.127	75.466	71.6985	74.8722	80.533
PPIL3	26.7445	24.9362	27.0253	19.4939	20.9274	17.8583	20.1787	26.1489	18.415	19.6793	19.5133	19.3479
NIF3L1	53.2266	45.5266	49.396	23.1948	24.3769	25.533	26.3523	24.3507	24.8323	30.3088	27.5729	30.1206
ORC2	100.589	72.6082	98.7358	19.1783	20.2167	18.0996	27.8794	15.7299	26.5741	40.3259	39.0846	39.5765
FAM126B	8.27741	6.89125	7.58371	11.465	12.4024	10.6995	11.36	2.43735	12.7788	20.5187	20.3532	22.3135
NDUFB3	169.729	213.156	153.122	276.047	274.975	279.725	289.419	343.743	266.363	294.312	318.237	290.561
GM20257	0.807278	0.940162	1.34445	3.25395	1.94469	2.86252	4.30438	5.26886	4.31311	5.00197	4.2935	4.10195
ALS2CR12	0.047945	0.101522	0.079848	0.0743288	0.117854	0.118061	0.0639101	0.0634302	0.211508	0.0226772	0.11697	0
CFLAR	19.4331	18.5822	19.7881	30.8097	33.0689	30.0572	33.8837	14.7938	36.5008	46.5655	46.5276	50.0474
CASP8	31.1334	33.7916	30.8837	27.7907	29.8798	26.7551	30.8005	18.8437	30.5081	27.9194	29.5028	29.1971
TRAK2	80.2172	76.3903	75.8202	41.9634	48.2203	42.8961	45.1045	17.9266	47.644	58.0592	58.5118	59.369
STRADB	13.3056	13.034	13.7228	22.4982	21.8043	22.2763	22.2862	17.1284	22.427	20.7772	18.7607	20.155
ALS2CR11	0	0.0187704	0	0.036647	0	0	0	0.0312736	0	0.0167711	0	0
TMEM237	24.9061	21.6428	23.7174	25.1273	23.7164	24.7582	22.1501	13.7546	20.7725	18.1234	18.6027	18.856
MPP4	0.0244772	0	0	0.0252979	0	0.072328	0.0435039	0.0215886	0.0599892	0.0231547	0.0477732	0.108151
ALS2	19.6218	21.9075	19.4028	20.9357	23.3335	21.7428	20.1617	7.43388	19.4784	20.1491	19.0066	19.9811
CDK15	0	0	0	0	0.0251506	0.0755845	0	0	0.100304	0	0.0249621	0.0282551
FZD7	91.3601	104.545	94.5438	176.237	178.546	175.083	91.067	51.4277	97.8035	63.4374	62.2686	68.3572
GM973	0.0420369	0.100138	0.0233362	0.162924	0.113664	0.124215	0.0933912	0.129766	0.206049	0.407597	0.338436	0.336649
SUMO1	235.515	255.833	234.419	295.089	306.107	282.511	273.125	262.819	251.915	264.118	288.792	270.765
NOP58	483.424	312.224	478.185	67.6215	72.039	60.6026	100.994	63.4905	87.3826	103.347	101.147	92.6106
SNORD70	10.6926	9.81123	5.54014	0	0.700896	2.10638	0.633474	0	0.698818	1.34865	0.695641	0
SNORD11	0.599693	1.90474	1.99747	0.6198	0	0.590679	0	0.528921	0	0.56729	0	0
BMPR2	61.6035	51.7863	61.6017	56.9422	72.1037	62.9197	59.1295	16.8248	70.0158	62.5848	71.0111	72.5836
FAM117B	24.0242	26.3894	24.2782	43.9583	43.9541	46.3781	32.1363	14.2344	33.1355	24.2309	24.8569	25.7908
ICA1L	0.0103509	0.0438352	0	0.0106979	0.050887	0.0611717	0.0551904	0	0.0202944	0.0293748	0	0
WDR12	54.7237	41.5399	51.4643	13.0119	14.3814	12.9738	14.9771	14.4797	13.2417	17.4038	16.7417	18.0851
CARF	8.43195	5.78333	9.18786	7.00816	7.8543	7.17386	6.28101	2.39453	6.72417	4.69815	4.76386	4.8084
NBEAL1	14.6904	10.0792	14.2421	9.82634	13.4563	11.1349	12.4946	1.00726	15.2456	17.5627	20.8157	21.28
CYP20A1	65.6442	57.7743	62.9062	62.6163	59.8418	60.195	56.1433	24.1535	55.0008	57.24	58.5089	65.1433
ABI2	36.3956	30.1504	34.6725	22.9683	23.1628	23.5212	19.7432	7.79224	20.6886	19.0841	19.317	19.4972
RAPH1	37.9381	31.3565	39.973	52.4615	53.4375	58.0376	20.1143	6.16952	22.8431	20.6745	26.2899	29.7765
CD28	0.0262548	0.0370624	0.02915	0.217081	0.240938	0.146541	0.108881	0.0385939	0.111532	0.107624	0.264753	0.0870038
CTLA4	0.214996	0.310396	0.0651011	0.0404008	0.134523	0.0770052	0.0347378	0	0.0574816	0.018489	0.0572203	0.0215897
ICOS	0	0.0122887	0.0128869	0.0239922	0.0342373	0	0	0	0.0113786	0.0109798	0	0.0128211
9530026F06RIK	0	0	0	0	0	0	0	0	0	0	0	0
PARD3B	0.234103	0.100094	0.184942	0.311746	0.327564	0.292665	1.22822	0.329567	1.07687	6.44772	5.18854	4.10764
NRP2	102.755	89.3122	101.872	73.8737	81.0915	66.3526	52.7464	15.8364	53.9189	44.1571	44.4271	51.3568
4930487H11RIK	0	0	0	0	0	0	0	0	0	0	0	0
INO80D	19.1179	15.2974	18.9162	14.2751	17.378	14.8587	14.5648	4.44326	16.0671	16.3097	18.534	18.8629
INO80DOS	1.76114	1.7092	1.7924	3.4887	3.44264	3.63454	3.5959	2.14503	4.70674	2.9353	3.25314	2.84858
NDUFS1	124.972	115.749	123.977	86.9261	97.6343	82.9437	102.477	69.695	94.6369	117.035	110.607	116.672
EEF1B2	519.234	486.473	531.507	513.555	498.906	490.023	548.667	724.292	469.433	420.089	416.259	424.647
SNORA41	10.0303	13.4512	7.42421	5.18328	3.61613	2.96385	7.13079	8.55166	7.86634	7.90692	3.58901	5.90907
GPR1	0	0	0	0	0	0.0413935	0	0	0	0	0.0205055	0
ZDBF2	0	0	0	0	0.00282964	0	0	0	0.0056425	0.00544474	0.00280842	0.00317892
ADAM23	0	0	0	0.0113559	0	0.00541119	0	0.0145363	0.00538568	0.00519693	0.0053612	0.0182054
DYTN	0	0	0	0.0160887	0.0612237	0.0153328	0	0	0	0	0	0
MDH1B	0.022081	0.0935117	0.0490319	0.342321	0.260532	0.217491	0.117735	0.136326	0.151526	0	0.0430964	0.0975636
FASTKD2	40.5272	31.2134	42.1169	19.9684	22.2653	21.2246	25.6965	18.0802	24.1292	28.8925	28.7014	29.6101
4933402D24RIK	0	0.0455577	0.119438	0.0444731	0.0211546	0.0211918	0	0	0	0.0203527	0	0
GM13749	0	0	0	0	0	0.0259866	0	0	0	0	0	0
MIR1958	0	0	0	0	0	0	0	0	0	0	0	1.19237
KLF7	50.5061	44.4607	54.6627	36.0662	38.4821	38.4383	32.4935	3.51677	40.9739	39.5647	43.9889	43.8882
MIR6899	0	0	0	0	0	0	0	0	0	0	0	0
CREB1	40.9974	34.3472	41.0601	40.4014	42.6175	39.4753	29.9739	11.3645	30.9766	29.4241	29.0845	30.3444
METTL21A	9.70733	8.07194	11.5173	16.8727	15.8427	17.071	17.8701	14.9237	18.4631	13.2045	12.474	13.6501
2810408I11RIK	12.5052	15.8203	10.9426	3.34066	2.91761	4.59288	0.894682	0.934698	1.19475	1.0025	1.03419	0.702376
CCNYL1	35.3136	39.1381	33.2133	14.2039	16.0401	12.964	18.262	10.4808	18.3224	19.8063	19.8651	21.3729
FZD5	3.96713	4.20592	3.90104	3.28689	4.08332	3.76756	3.4623	1.1615	3.61052	5.48443	5.5938	5.08834
PLEKHM3	5.45397	4.2186	5.9868	5.82382	6.98522	5.72839	4.56439	1.67349	4.44258	3.70249	3.56546	3.75313
AKR1CL	0	0.0295637	0	0	0	0	0	0	0	0	0	0
CRYGE	0	0	0	0	0	0.0579638	0	0	0	0	0	0
CRYGD	0	0	0	0	0	0	0	0	0	0	0	0
CRYGC	0	0	0	0	0	0	0	0	0	0	0	0
CRYGB	0	0	0	0	0	0	0	0	0	0	0	0
CRYGA	0	0	0	0.0634917	0	0	0	0	0	0	0	0
D630023F18RIK	0	0	0.0157281	0.0292819	0.0139286	0.0418591	0	0	0	0	0	0
IDH1	36.6029	57.4564	32.3634	82.3551	90.2175	84.0569	88.5211	51.8828	74.0899	72.8272	64.7097	68.1796
PIKFYVE	14.0985	12.5383	13.704	15.5496	19.1332	15.9729	17.242	4.95019	18.6914	21.6817	22.1541	22.0993
PTH2R	0	0	0	0	0.0307767	0	0.0139081	0	0.0460282	0.02961	0	0
CRYGF	0	0	0	0	0	0	0	0.160717	0	0	0	0
MAP2	50.6548	44.6952	52.8666	47.4369	52.7602	44.2306	89.2391	38.7972	102.571	140.387	141.104	146.708
UNC80	0.0167504	0.0443357	0.0495935	0.0403948	0.0301945	0.0549956	0.0347327	0.0196982	0.0328418	0.0660225	0.0681094	0.0986811
RPE	65.2183	50.357	66.1579	39.6413	40.156	38.9248	46.7229	22.0837	41.403	54.764	55.0091	53.8084
KANSL1L	16.7155	12.7982	18.5324	20.1964	22.2026	20.4279	19.3898	8.15549	21.3198	21.4886	22.7333	19.9634
ACADL	225.675	231.62	232.882	303.018	307.077	303.299	258.373	200.035	247.987	398.599	472.104	417.5
MYL1	0	0	0	0.105533	0	0.06705	0.030247	0	0.100101	0.0321976	0.0664306	0.0375972
LANCL1	12.0769	10.5895	11.7161	22.9768	22.0087	22.965	26.5673	27.6974	26.4185	22.3361	20.2403	21.5072
CPS1	0	0	0	0.0210612	0	0.0200716	0.0301817	0.017973	0	0	0.0132574	0
ERBB4	0	0	0	0.0275175	0	0.0174831	0	0	0.00870034	0	0.0173216	0.0196067
IKZF2	2.76708	2.20781	3.21469	6.71444	7.01469	6.75052	5.49531	1.35113	5.99139	4.32847	4.62574	4.68226
SPAG16	0.0154459	0.0245296	0.0257237	0.119728	0.0531546	0.0684618	0.0205892	0.0476807	0.007571	0.0292226	0.00753658	0.0170617
VWC2L	0	0	0	0	0	0	0.014425	0	0.00795646	0	0	0.00896516
BARD1	21.3383	19.6401	20.3805	3.76999	4.01613	4.92482	2.4589	0.740081	1.78116	1.67282	1.17077	1.11073
ABCA12	1.00319	0.538263	1.23981	0.201735	0.178529	0.183314	0.326746	0.140126	0.68975	0.257642	0.239208	0.32592
ATIC	275.823	259.178	255.263	95.2182	99.8472	96.8729	118.917	81.3588	115.254	89.0265	86.1217	85.8632
FN1	1334.93	976.608	1371.49	1291.49	1489.32	1474.39	366.076	121.699	390.086	225.787	295.009	329.083
APOL7D	0.22168	0.268229	0.105482	0.81826	0.467068	0.655045	0.422139	0.391038	0.527774	0.0299575	0.123618	0.349814
GM8883	0.667371	0.549553	0.452811	2.3758	1.23946	1.46076	0.494222	0.130803	0.508855	0.315656	0.217089	0.286683
4933417E11RIK	0	0	0	0.035725	0	0.0340465	0.0921522	0	0	0.0326983	0	0
MREG	15.1547	12.4828	17.583	17.2604	19.5497	19.2557	6.89529	3.72918	5.76434	3.45494	2.92822	2.82906
PECR	11.7327	11.4767	10.0177	12.3568	13.8245	12.0274	15.6963	19.4589	14.8774	10.7972	9.11612	9.29744
TMEM169	0.147633	0.127885	0.134111	0.499363	0.950131	0.621315	0.250464	0.142048	0.223671	0.0761761	0.104779	0.0593007
XRCC5	54.6607	58.2624	50.4642	57.41	57.6978	52.1794	53.4349	38.9408	51.8465	40.745	37.8354	38.3204
2018-03-04	0.0992565	0.0859796	0.0701284	0.167866	0.159698	0.284406	0.0962239	0.0795844	0.150379	0.136572	0.114473	0.10964
SMARCAL1	10.1442	9.1198	10.3196	16.6075	16.5352	16.5255	15.9496	12.1775	16.3538	14.4234	12.9412	13.8281
ANKAR	0.0165233	0.00874691	0.00917271	0.00853868	0	0.0081375	0	0.00728668	0	0.00781528	0	0
RPL37A	716.997	1155.91	630.272	1094.85	1095.91	1115.5	1225.8	1924.01	1084.29	861.329	929.186	835.154
IGFBP2	15.5165	15.2825	12.6757	1.64782	1.62363	1.26193	0.759023	1.12998	0.753586	6.78696	6.55695	6.79299
IGFBP5	848.941	812.955	807.193	512.959	659.568	493.308	2063.11	865.353	2127.99	14241.2	18287.7	17437.1
TNP1	0	0	0	0	0	0	0	0	0	0.16779	0	0
1700027A15RIK	0	0	0	0	0	0	0	0	0	0	0.0645691	0.0730873
PINC	0.14531	0.33333	0.107556	0.175213	0.166687	0.500941	1.42044	0.726249	1.40077	0.962211	1.27623	0.58854
D530049I02RIK	0	0	0	0	0	0	0	0	0	0	0	0
6030407O03RIK	0	0.0222097	0	0.0867238	0.020626	0.0619869	0.130494	0.0925097	0.143954	0.0992207	0.122828	0.11586
MIR6351	0	0	0	0	0	0	0	0	0	0	0	0
TNS1	0.0682234	0.0642049	0.0547059	0.885304	0.756515	0.769044	0.932989	0.518149	0.980925	0.731422	0.636182	0.682429
RUFY4	0	0	0	0.066862	0.0318044	0.127441	0.028745	0.0427937	0.0475651	0.0152994	0	0.0178651
CXCR2	0.670442	0.775543	0.703019	0.230974	0.231943	0.366869	0.0772326	0.164256	0.0973706	0.129192	0.0848119	0.0960006
CXCR1	0	0	0	0	0	0	0	0	0	0	0	0
MIR1928	0	0	0	0	0	0	0	0	0	0	0	0
ARPC2	480.526	477.616	473.418	417.125	418.671	410.04	420.528	381.023	406.019	425.984	474.702	446.805
GPBAR1	0	0.0808073	0	0	0.0375227	0	0.10174	0.0673172	0	0	0	0
AAMP	96.735	140.812	93.3201	210.663	196.065	208.739	250.57	292.977	246.827	246.64	246.414	241.775
PNKD	13.5039	17.8398	12.4762	34.9195	34.7913	32.2263	29.5069	31.3512	31.1749	24.7929	24.5758	23.4539
TMBIM1	180.346	148.375	181.539	222.836	207.038	208.014	207.828	216.297	227.646	182.287	190.173	196.374
CATIP	0.0179822	0	0.0199652	0.241607	0.565787	0.531358	0.127841	0.0317201	0.123399	0.085053	0.122838	0.0397266
SLC11A1	0.0327957	0	0	0.0508429	0.0483691	0.0161514	0	0.043388	0.0321505	0.0155118	0.0640086	0.0724528
CTDSP1	102.372	114.206	106.68	124.738	128.129	118.971	151.942	151.846	164.387	147.257	152.377	145.539
MIR26B	0	0	0	0	0	0	0.39499	0	0	0	0	0
VIL1	0.0484833	0.0128327	0.0134574	0.112745	0.0595885	0.0596933	0.0969417	0.0427616	0.0594118	0.0802615	0.035485	0.0669439
USP37	43.8341	33.3349	43.3983	13.5277	14.635	14.2366	14.3049	6.67273	15.6261	15.7787	15.596	16.6676
RQCD1	185.664	188.816	180.31	78.8002	77.9119	77.5703	75.5881	53.3907	73.3716	72.157	66.897	66.9182
PLCD4	0.0121053	0	0.0537607	0	0	0.0238467	0.0107575	0	0	0	0.0118132	0
ZFP142	26.3079	21.6219	24.7403	13.2736	15.0588	13.392	14.1315	7.55453	15.7181	14.2154	15.7305	15.0354
BCS1L	31.8383	30.2996	31.7083	37.4452	36.444	37.6434	28.9292	32.4456	28.231	22.2971	24.1462	23.402
RNF25	35.0218	39.2965	33.0413	47.179	47.9979	47.0758	49.0786	64.6613	50.6603	48.2323	47.5383	52.9914
STK36	1.6963	1.78829	1.83527	7.90795	7.79288	7.78525	4.36836	2.75667	4.7765	3.97407	3.353	4.10631
TTLL4	35.5598	32.438	33.3168	19.3447	21.8273	19.9582	20.4381	3.51005	20.5782	18.7394	18.7162	20.9891
CYP27A1	0.0399795	0	0	0	0.0196548	0.0196893	0	0	0.0195965	0.0189097	0	0.0441617
PRKAG3	0	0	0.0148117	0	0	0.0262802	0	0	0.0130782	0.0252396	0	0
WNT6	0.347114	0.328817	0.304256	0.453161	0.53889	0.413875	0.584463	0.547847	0.591021	0.172821	0.160455	0.181623
WNT10A	7.03209	5.54814	7.95727	7.18822	6.47855	6.58482	9.55348	12.9822	11.2377	3.88193	2.57575	2.85171
CDK5R2	0	0	0	0	0	0	0	0	0	0	0	0
FEV	0	0	0	0	0	0	0	0	0	0	0	0
CRYBA2	0	0	0	0	0	0	0.0466307	0	0	0.0992758	0	0.0579623
MIR375	0	0	0	0	0	0	0	0	0	0	0	0
CCDC108	0.00660732	0	0	0.0136577	0	0.00650801	0.00587166	0	0.0129546	0	0	0
IHH	0.123668	0.130932	0.102979	0.0319537	0.0911968	0.0456785	0.0412121	0.0818052	0.0454632	0.116986	0.090513	0.136605
NHEJ1	4.06387	4.82265	5.05741	4.38475	5.18133	4.79455	4.32575	6.45958	3.72125	4.09777	3.05062	3.55173
SLC23A3	0.569096	0.447032	0.896822	1.59377	1.93138	1.97094	1.32143	1.57057	1.47573	1.63241	1.03907	1.78449
CNPPD1	32.482	35.8653	33.0151	75.9413	75.0276	74.6158	74.0519	76.9156	79.4585	72.2487	73.8187	71.5311
FAM134A	60.2852	63.4972	62.1208	98.5523	95.77	95.4516	100.446	105.756	104.676	97.9224	99.7915	101.587
ZFAND2B	36.6754	31.2237	41.527	38.326	36.5183	38.4446	32.5661	42.9672	33.901	32.6303	36.7554	32.6409
ABCB6	22.3489	18.561	22.2391	13.859	12.5767	14.5146	7.78398	7.99819	8.28384	11.5029	10.094	10.9134
ATG9A	34.561	37.857	36.4724	54.4591	53.5369	51.6467	52.8096	42.2955	58.7259	49.2449	45.478	50.492
ANKZF1	10.9874	11.3704	10.4661	17.0912	18.7686	19.253	16.3798	13.1868	14.6814	14.1668	14.8443	15.2701
GLB1L	1.75164	2.01679	1.5923	5.36322	5.17761	5.40238	6.52803	4.28715	7.02969	6.14123	5.80117	6.09486
STK16	30.9918	27.5385	30.7417	30.2701	28.3242	29.9111	34.5912	36.2355	32.932	38.9749	37.072	38.0264
TUBA4A	138.185	201.226	129.6	128.573	121.738	138.048	118.352	145.218	121.972	101.717	114.163	107.778
A630095N17RIK	1.82253	2.08603	2.29696	10.5891	10.4129	12.8571	8.09806	8.12414	9.706	0.792135	0.672967	0.707336
DNAJB2	30.9039	22.9782	33.6046	45.8377	42.5172	43.5795	45.3036	53.8791	51.1793	34.8355	32.115	35.2964
PTPRN	0.117563	0.147099	0.166126	0.121505	0.0735594	0.10527	0.0949763	0.188526	0.115251	0.0404405	0.0417188	0.0590281
RESP18	0	0	0	0	0	0	0	0	0	0	0	0
DNPEP	32.7717	41.5824	36.8597	82.6697	81.5679	84.1781	67.2	72.9625	65.6052	55.923	54.3372	53.7852
DES	0.0246529	0.0261009	0.0410572	0.165617	0.315117	0.376377	0.0657242	0.130461	0.108756	0	0.0481161	0.0272319
GM15179	0	0	0	0	0	0	0	0	0	0	0	0
SPEG	0.516414	0.570225	0.566326	3.46106	3.45152	3.19546	2.18197	1.79394	2.41636	0.842158	0.776026	0.745417
GMPPA	36.8905	41.1515	45.6803	94.4497	88.517	99.437	75.344	88.1463	77.4682	63.5963	63.073	61.8891
ASIC4	0	0	0	0.0147349	0.0140179	0	0	0	0	0.0134865	0	0
CHPF	22.0144	24.9395	22.0691	22.1369	20.1527	20.1191	43.2572	46.9083	46.1736	64.0987	64.1417	63.8183
TMEM198	1.02016	0.677339	0.825498	0.53612	0.408027	0.681241	0.706824	0.991272	0.966192	1.22675	1.18116	1.10778
OBSL1	0.0523822	0.0762558	0.0508887	0.304529	0.26396	0.245075	0.2793	0.179026	0.269596	0.204401	0.115016	0.137422
INHA	0	0	0.0286718	0.0266899	0.126957	0.101744	0.160642	0	0.151896	0.0488575	0.0504019	0.171153
STK11IP	12.1105	12.5347	12.9755	18.2712	17.9988	18.3643	18.4741	12.9835	17.8125	15.0317	13.646	13.8361
SLC4A3	2.33949	2.612	2.84305	7.43843	8.12209	7.18112	8.64112	6.02512	8.10635	5.19873	5.28834	4.78316
GM17751	0	0	0	0	0	0.0170077	0	0	0	0	0	0
MIR6343	0	0	0	0	0	0	0	0	0	0	0	0
EPHA4	0.644802	0.252842	0.808709	1.17241	0.997957	1.08792	1.95248	0.384404	1.60956	3.8518	2.82577	2.61819
MIR6352	0	0	0	0	0	0	0	0	0	0	0	0
PAX3	0.0586049	0.113753	0.0867566	0.292754	0.192076	0.192414	0.156239	0.0689183	0.220232	0.0554384	0.0857861	0.0755248
SGPP2	0.0755991	0.0400196	0.0944275	0.214868	0.222996	0.288543	0.243534	0.141689	0.268655	0.0715143	0.212103	0.073069
FARSB	147.7	116.36	144.757	51.2122	55.9334	49.0845	45.171	38.5191	41.0051	55.7555	55.4704	54.0933
MOGAT1	0	0.0331672	0.0347818	0.194266	0.123209	0.33942	0.0556785	0.0552604	0	0	0.0917138	0
ACSL3	110.214	119.888	110.941	157.386	163.994	152.525	73.4466	38.198	73.1933	111.878	127.184	117.412
UTP14B	9.88883	10.128	9.74649	10.701	12.6624	11.8528	6.44326	2.27671	6.64272	6.70617	7.67756	7.84129
KCNE4	0	0	0	0.0158536	0	0.0302174	0.0136314	0	0	0	0.0149691	0
SCG2	0	0.0160964	0.01688	0.0157132	0.0149487	0.0299499	0	0	0	0	0.0296732	0.0335878
AP1S3	17.4716	14.9512	16.875	11.9342	12.1931	11.9298	8.56864	4.25215	8.78285	12.2279	12.499	12.7549
WDFY1	20.1726	19.6434	19.8611	28.9749	30.8275	30.6923	23.6742	11.8613	21.7871	24.5793	24.5037	24.7263
MRPL44	36.6398	35.3929	33.0508	34.0294	32.6345	30.7319	40.3408	37.0192	33.5781	35.664	31.147	32.7064
SERPINE2	418.142	387.967	437.676	486.088	521.348	532.043	201.821	134.31	153.448	70.8003	67.6918	71.6871
FAM124B	0.0264016	0.0279522	0.0293129	0	0	0	0	0	0	0.0124875	0.0128822	0
CUL3	207.684	176.265	198.352	111.279	121.616	110.548	115.129	62.1834	115.507	131.514	130.909	136.719
1700016L21RIK	0	0	0	0	0	0	0	0	0	0	0	0
DOCK10	0	0	0	0.00517047	0	0	0.00889145	0.00882468	0.00980862	0.00946485	0.014646	0.0110521
NYAP2	0	0	0	0.00795911	0	0	0	0	0.0150988	0	0	0
MIR6344	0	0	0	0	0	0	0	0	0	0	0	0
IRS1	17.3833	22.1585	14.086	12.2473	14.2379	11.8993	27.7885	17.2556	32.1909	64.8596	70.004	71.3462
RHBDD1	74.6665	47.5781	76.7387	33.2183	36.2578	31.4893	39.685	21.8925	42.0538	44.7169	42.9615	42.5546
COL4A4	0.319355	0.348357	0.225636	0.225043	0.242639	0.371746	0.176299	0.0384091	0.113844	0.228863	0.203044	0.176381
COL4A3	0.122878	0.0836326	0.0828314	0.0952486	0.103559	0.0691607	0.0506985	0.0077412	0.0387195	0.0705736	0.0813695	0.116342
MFF	93.6514	88.707	92.8227	77.027	78.418	73.6075	78.3456	65.9829	72.4859	89.9327	86.2912	86.4866
TM4SF20	0	0	0	0	0.0247156	0	0	0	0.0246423	0	0	0
AGFG1	81.848	71.1629	81.2059	47.6485	49.3681	47.9365	53.6523	27.0655	55.066	66.4543	70.4824	68.7122
SLC19A3	0.0508146	0.0537991	0.056418	0	0	0	0	0	0	0.0120172	0.0123971	0
CCL20	1.03638	0.149625	2.40593	0.535563	0.138956	0.5104	0.753534	0.29084	0.646537	0.311939	0.459713	0.312216
DAW1	0	0	0	0	0	0	0	0	0	0	0	0
SPHKAP	0	0.00614245	0	0.0119924	0.0114089	0.00571449	0.00515573	0	0	0	0.0056617	0.00640861
PID1	0.722464	0.44994	0.692036	0.204973	0.278571	0.18139	0.516138	0.162424	0.249971	0.428818	0.193538	0.375549
MIR6353	0	0	0	0	0	0	0	0	0	0	0	0
DNER	0.0936194	0.165197	0.184788	0.0322528	0.0102278	0.0204916	0.0277319	0	0	0.0295203	0	0.034471
MIR5126	0	0	0	0	0	0	0	0	0	0	0	0
TRIP12	119.724	110.942	121.377	133.581	144.56	133.726	119.214	47.1289	127.981	110.312	115.059	119.895
FBXO36	11.3342	12.9777	11.279	50.5881	45.7327	46.7641	30.8136	42.8003	33.169	19.2992	18.4345	22.072
SLC16A14	2.34822	1.78798	2.73217	1.24672	0.94885	0.918834	0.514546	0.0851137	0.394182	0.045644	0.235434	0.124364
A530032D15RIK	0	0	0.0476668	0.0887441	0.0844261	0.0211436	0.0572286	0.0378659	0.0420879	0.0812256	0.0418966	0.0237118
GM7609	0.0938067	0.0248291	0.0781132	0.412046	0.0922346	0.0923967	0.166724	0.0413681	0.183922	1.17578	2.26569	1.21753
C130026I21RIK	0.11501	0.142059	0.10641	0.752816	0.452329	0.226562	0.664328	0.321217	0.469779	1.05169	0.991403	0.74107
SP110	0.517543	0.730587	0.787433	3.28862	3.24169	2.8509	3.30461	2.51901	2.19856	3.31826	5.01313	2.66785
SP140	1.18846	1.09271	1.44105	7.91938	9.01011	7.68592	8.72705	6.86852	7.41973	8.93482	8.80521	9.27588
SP100	0.0525217	0.222426	0.17494	0.633299	0.67134	0.844961	0.995711	0.370588	0.583535	0.430594	0.734646	0.754208
A630001G21RIK	0.0975739	0.020661	0.0433335	0.161353	0.287816	0.038443	0.208104	0.103271	0.210439	0.110762	0.114263	0.107781
MIR8096	0	0	0	0	0	0	0	0	0	0	0	0
9930111H07RIK	0	0	0	0	0	0	0	0	0	0	0	0.0508317
CAB39	152.236	136.209	153.636	98.3686	99.9561	91.4063	106.845	62.584	111.093	131.831	126.625	139.124
ITM2C	41.9059	45.2367	46.0917	120.499	116.104	115.205	221.997	229.188	215.417	245.549	221.232	235.84
4933407L21RIK	0	0	0	0	0	0	0	0	0	0.0622636	0.0321158	0
GPR55	0	0	0	0.0153127	0	0.0145932	0	0	0	0.0140154	0.0289168	0.0163658
SPATA3	0	0	0	0	0	0	0	0	0	0	0	0
2810459M11RIK	0	0	0	0.0117224	0.0223041	0.033515	0.0100793	0	0.022238	0.0321879	0	0.0125286
PSMD1	214.407	237.541	203.331	125.441	137.489	125.913	157.188	108.552	152.87	182.066	176.634	181.953
HTR2B	0	0	0	0.0188453	0	0.0359197	0	0.0321641	0.0178752	0	0.0177939	0.0201413
ARMC9	2.99744	2.54183	2.7773	5.05922	5.12403	4.69408	6.60496	4.571	6.17289	5.03179	5.09263	4.8593
B3GNT7	0	0	0.0323289	0.0150472	0.0429451	0.0430206	0.025876	0.0385225	0.0285452	0.0275447	0.0142077	0.032164
NCL	512.759	421.239	474.328	141.501	153.692	131.423	143.864	114.761	136.819	162.772	176.357	164.814
SNORA75	2.93126	3.79307	1.44644	1.00985	1.60118	0	0.868296	4.02162	1.27715	2.77288	1.90702	0.719532
GM24148	2.82712	3.80949	2.56817	1.06251	0.505408	0.759444	0.228395	1.81344	1.00782	0.729373	0	0.567794
SNORD82	0.555597	0	0	0	0	0	0	0	0	0.525578	0	0
C130036L24RIK	0.746063	0.884668	0.5964	1.69637	1.58449	1.52849	1.11383	0.789621	1.46277	0.677522	0.262102	0.692251
NMUR1	0.0310186	0	0.0344391	0.288527	0.24399	0.244419	0.27565	0.492443	0.638575	0.0293426	0.0302701	0.0685268
1700019O17RIK	0	0	0	0	0	0	0	0	0	0	0	0
PTMA	3670.81	4636.5	3244.37	2629.83	2851.66	2612.36	2590.25	2417.02	2485.95	2297.57	2393.61	2311.31
PDE6D	40.3755	40.4026	36.6458	54.8165	52.5576	54.6264	52.6364	53.7058	50.5702	39.4376	39.705	38.2169
COPS7B	17.8319	21.6762	15.0414	13.7917	14.8856	14.3447	19.5786	16.071	18.7594	14.3053	12.9397	13.9733
NPPC	0	0	0	0	0	0	0.0966626	0	0	0	0.0353829	0
DIS3L2	27.1291	22.529	29.5122	28.0141	30.1186	27.5311	27.5602	24.1692	28.616	25.9	25.3467	24.9265
ALPPL2	0	0	0	0	0.0175888	0.0352394	0	0.0157775	0	0.016922	0	0
ALPI	0	0	0	0	0	0.0159233	0	0	0	0	0	0
AKP3	0	0	0	0.0232425	0	0	0	0	0.022046	0	0	0
ECEL1	0	0	0	0	0	0.0249332	0	0	0	0	0	0
PRSS56	0.0944988	0.0400196	0	0	0	0.0372314	0.0167955	0.0166693	0.0185279	0	0	0.0208769
CHRND	0.0254844	0	0.042442	0.0263389	0.0125287	0.0125507	0.0339705	0.0112384	0	0	0	0
CHRNG	0	0	0	0	0	0	0	0	0	0	0	0
EIF4E2	47.2641	46.7528	45.3516	41.7018	42.4844	39.5008	44.8018	46.6697	45.8232	42.7668	42.3978	40.9199
EFHD1	1.65356	1.72852	2.16125	23.7529	17.0611	21.503	20.5537	23.2054	30.6558	22.0574	25.4508	32.7158
GIGYF2	37.182	37.3112	36.1328	69.3783	75.9573	65.3151	70.0596	30.2642	81.2848	76.2517	82.2378	88.4579
KCNJ13	0	0	0	0	0	0	0	0	0	0	0	0
3110079O15RIK	0.735986	1.55843	0.998733	5.49368	3.53786	4.99392	2.97952	8.94357	5.13071	2.70752	2.55369	2.43893
NGEF	33.259	36.9855	35.5383	79.641	64.9642	64.8804	20.6961	26.439	30.952	3.44297	3.57359	5.10561
NEU2	0.168915	0.238448	0.166704	1.55181	1.73466	1.46041	0.850611	0.662136	0.79116	1.70441	2.0147	2.65365
INPP5D	0.0611832	0.105262	0.0424563	0.023713	0.180474	0.105461	0.156317	0.0809441	0.157446	0.0651121	0.119414	0.152063
ATG16L1	31.8759	29.0941	30.6423	21.6725	21.9264	20.6309	24.7372	21.2506	26.427	27.2315	23.988	27.3232
SCARNA6	0.914047	0.483867	0.676561	0.472347	0.299576	0.600206	0.406139	0.671814	0.448032	0.72055	0	1.34622
SAG	0	0.0465653	0.0976642	0.227284	0.0864901	0.0866421	0.0977128	0.0775832	0.194026	0	0.0643812	0.0728746
DGKD	58.4359	40.8918	61.6899	26.8751	25.9002	26.1352	27.206	14.8702	27.8723	37.5972	34.5379	38.442
USP40	22.3372	19.8268	22.1333	24.3642	25.5197	23.8215	25.2501	12.8186	25.1096	20.7941	20.0643	21.1804
UGT1A10	0	0	0	0	0	0	0	0	0	0	0	0
UGT1A9	0	0	0	0	0	0	0	0	0	0	0	0
UGT1A7C	0.0114695	0.0364295	0	0.0355623	0.0112773	0	0	0	0	0	0.0223855	0
UGT1A6B	0	0	0	0	0.0162004	0.0162289	0.014642	0	0.0161524	0	0.0482368	0.0364002
UGT1A6A	1.47598	1.25983	1.98174	2.16404	2.50875	2.70474	1.1998	0.333018	0.953414	1.39623	1.33988	1.40289
UGT1A5	0.011777	0.0249374	0	0	0.0115796	0	0	0	0	0	0	0
UGT1A2	0	0	0	0.0121795	0	0	0	0.0207873	0	0	0	0
DNAJB3	0	0	0	0	0	0	0	0	0	0	0	0
UGT1A1	0	0	0	0.0362782	0.0575217	0.0691473	0.0103977	0	0	0	0	0
MROH2A	0	0.00533186	0.00559141	0.374755	0.252536	0.2629	0.187965	0.159903	0.385086	0.0476397	0.0786328	0.0945692
HJURP	6.73327	5.55985	6.40212	4.15969	4.40188	4.48017	2.82868	1.46887	3.37062	2.64688	2.21502	2.65065
6430706D22RIK	0	0	0	0	0	0	0	0	0	0	0	0
A730008H23RIK	0	0	0	0	0	0	0	0	0	0	0	0
TRPM8	1.58238	1.50883	1.89874	0.883747	0.879402	1.21977	0.375569	0.147366	0.240878	0.111569	0.172643	0.0434265
SPP2	0	0	0	0	0	0	0	0	0	0	0	0
GLRP1	4.15066	5.76387	4.05107	2.89314	2.22088	2.56705	0.46321	0.40865	0.283884	0.109574	0	0.0426498
GM19589	1.70027	4.43932	1.56781	2.53168	2.38016	2.52627	0.320119	0.190629	0.240135	0.0136305	0.0140614	0
ARL4C	177.338	183.962	192.505	141.077	129.576	131.558	109.637	70.6349	101.531	58.4931	50.6274	51.7715
PLATR5	0	0.0840328	0	0	0	0	0	0.0700042	0	0	0	0
1700067G17RIK	0	0	0	0	0	0.0617127	0	0	0	0	0	0.138417
SH3BP4	47.7478	41.0887	48.7647	38.8135	39.8276	39.2391	32.9251	20.0404	33.5686	46.6664	45.8729	46.9821
C030007H22RIK	0	0	0	0	0	0	0	0	0	0	0	0
AGAP1	36.5858	19.0333	40.4889	15.9148	17.0481	15.8584	16.13	10.2216	16.9009	31.8188	32.2704	34.1102
4933400F21RIK	0	0	0	0	0	0	0	0	0.0205136	0	0	0.0115571
GBX2	0	0	0	0	0	0	0	0	0	0	0	0
ASB18	0	0	0	0	0	0.0265048	0	0	0	0	0	0
IQCA	0	0.0124609	0	0.0243286	0.0115724	0.0115928	0	0.0207614	0	0.0111337	0.0114857	0
ACKR3	23.2321	20.8191	25.0704	113.572	107.053	123.096	41.2763	23.3929	35.552	8.01398	7.79034	9.82584
COPS8	119.082	97.6877	124.976	56.6325	55.6305	57.2629	59.2785	57.6762	54.5612	61.5887	56.4337	59.8027
COL6A3	3.76726	4.74491	4.82885	2.73739	2.56993	2.87308	1.0158	0.381139	1.45198	0.527468	0.972652	1.26265
MLPH	0.261195	0.276536	0.271288	0.165455	0.14912	0.132784	0.224626	0.104038	0.189977	5.14091	6.46276	6.08681
PRLH	0	0	0	0	0.142328	0	0	0	0	0	0	0
RAB17	0.406868	0.861531	0.645335	3.08374	3.29565	3.79761	1.25688	1.41832	1.48149	18.1079	27.2074	25.1681
LRRFIP1	75.7784	73.9258	73.2736	59.3428	62.9302	59.0558	35.3864	13.9891	36.4763	33.7728	41.3436	39.9598
RBM44	0	0.0103868	0	0.0202791	0	0.0386526	0.00871829	0	0.00961759	0	0	0
RAMP1	0.250037	0.158834	0.347012	0.943236	0.57774	1.07131	0.766583	0.385927	0.330909	0.709582	0.65881	0.483339
UBE2F	94.4377	71.8115	95.8344	52.1109	54.2086	47.26	64.9806	59.1875	59.401	111.544	119.587	118.891
SCLY	10.7162	9.38822	11.2707	15.4633	14.0544	14.7199	15.8059	12.4712	14.3484	17.0195	18.0586	16.886
ESPNL	0	0.00735017	0.0154159	0.0789271	0.0614346	0.143599	0.234439	0.0857236	0.149728	0.164183	0.0948485	0.11503
KLHL30	0.087571	0.0927144	0.0694483	0.32324	0.233709	0.23412	0.277932	0.209642	0.196224	0.14201	0.158707	0.179645
FAM132B	31.9424	28.5184	31.9332	5.27105	5.18613	6.02807	2.44501	1.26659	1.57886	1.14264	0.576282	1.23049
ILKAP	85.6692	82.3677	85.948	60.4549	62.3198	62.3749	65.2585	82.1358	60.0503	69.1012	72.606	70.2564
1700020N18RIK	0	0	0	0	0	0	0	0	0	0	0	0
HES6	18.6215	19.6852	20.7063	32.2031	31.4154	34.2302	32.5933	44.654	31.7106	33.6511	33.1406	34.0115
PER2	13.0035	8.55226	14.3152	21.9353	22.4654	24.5323	8.25405	2.97997	9.61308	16.4828	16.8712	17.5954
TRAF3IP1	13.2772	12.8113	12.7039	7.95451	7.76913	6.71956	7.5302	4.88405	6.81487	8.04644	7.9953	8.9189
ASB1	5.23901	4.19627	5.34697	4.6044	4.08671	4.57805	4.62805	2.38171	4.84926	7.13373	5.48298	6.89362
TWIST2	1.41101	1.34145	1.27887	0.595235	1.13255	1.13454	0.12795	0.203183	0.282297	0.0544806	0.0281013	0
HDAC4	64.3468	33.9465	65.5837	20.3304	23.8893	19.8374	12.0169	1.96807	14.3737	13.4622	14.3083	14.3658
NDUFA10	220.528	215.019	212.787	172.726	190.039	175.045	178.368	206.409	167.602	194.985	198.769	194.891
MIR6900	0	0	0	0	0	0	0	0	0	0	0	0
OLFR1416	0	0	0	0	0	0	0	0.0354867	0	0	0	0
OLFR1415	0	0	0	0	0	0	0	0	0	0	0	0
OLFR1414	0	0	0	0	0	0	0	0	0	0	0	0
OLFR1413	0	0	0	0	0	0	0	0	0	0	0	0
OLFR1412	0	0	0	0	0	0	0	0	0	0	0	0
OLFR1411	0	0	0	0	0	0	0	0	0	0	0	0
OLFR1410	0	0	0	0	0	0	0	0	0	0	0	0
OLFR12	0	0	0	0	0	0	0	0	0	0	0	0
MYEOV2	39.5873	39.4933	35.5161	58.1043	56.74	59.0903	64.0789	105.59	54.6444	61.5259	63.3669	63.9199
OTOS	0.0536657	0.113635	0	0	0	0	0	0.141997	0	0.050766	0.104741	0.0592796
GPC1	148.634	158.332	146.389	180.495	147.701	163.801	90.4101	74.4304	91.4255	57.7845	51.5252	50.1687
MIR149	0.572434	0	0	0	0	0	0	0	0	0	0	0
ANKMY1	0.174749	0.111007	0.336299	0.650188	0.481096	0.699963	0.569404	0.184951	0.628139	0.462858	0.37517	0.321715
DUSP28	7.29767	7.21657	7.7648	7.98756	6.95114	6.61394	8.91707	10.9732	7.75027	11.4337	10.8307	11.5878
RNPEPL1	51.6049	60.6378	51.4293	87.7827	84.5139	80.4256	80.0962	89.9551	90.4788	78.2407	75.4	74.7593
9430060I03RIK	0.0225961	0.0478465	0	0.116768	0.155522	0.0890258	0.120481	0.159435	0.177212	0.128251	0.0882033	0.174719
CAPN10	15.4169	14.6262	15.6006	13.8437	12.0597	14.9912	12.2183	10.4935	12.3329	13.3168	12.546	12.1558
GPR35	0.0503966	0.124499	0.139885	6.11146	4.65789	5.68368	0.63446	0.511164	0.782247	0.333715	0.442624	0.398958
AQP12	0	0	0	0.0358891	0	0	0	0	0	0	0	0
KIF1A	0.0045404	0	0	0.00938526	0.00892861	0.0268329	0.00806973	0.0120137	0	0.0171803	0.0132925	0.0150461
AGXT	0	0	0	0	0	0	0	0	0	0	0	0
2310007B03RIK	0.223933	0.135477	0.213108	0.214909	0.172998	0.0787739	2.84286	2.39828	2.19527	2.37556	2.07603	1.37814
SNED1	0.219557	0.169869	0.13126	1.21314	1.20393	1.13951	2.13121	0.238333	2.41728	1.43788	1.34324	1.11002
MIR6901	0	0	0	0	0	0	0	0	0	0	0	0
MTERF4	6.14291	6.15379	5.22595	12.0499	12.0463	12.1124	11.5357	12.5448	10.2341	8.62486	8.05223	8.79978
PASK	16.8127	16.5968	16.6345	3.37917	3.70822	4.86332	2.96455	1.04803	2.2357	2.62512	2.46321	2.82078
PPP1R7	50.2742	45.4198	48.848	31.8322	34.1374	32.5981	35.4307	25.8512	35.4151	31.1606	30.7426	31.2111
MIR6902	0	0	0	0	0	0.58145	0	0	0	0	0	0
MIR6345	0	0	0	0.305058	0	0	0.262298	0	0	0	0	0
ANO7	0.0282015	0.00995263	0.0104371	0.145735	0.184859	0.222221	0.0751847	0.0331645	0.0184311	0	0.0366947	0.0207678
HDLBP	311.718	327.015	315.006	348.348	369.884	340.098	324.121	182.346	339.462	296.566	307.12	313.509
2018-09-02	292.953	297.346	280.065	240.96	249.303	242.821	245.532	127.601	229.723	189.073	177.19	181.164
FARP2	8.52768	7.34145	7.52726	10.4206	12.2685	10.8632	12.2728	6.51619	13.4724	13.658	13.1002	13.4949
STK25	64.9725	63.257	66.5167	90.3226	84.8319	91.957	78.8383	79.1474	82.9072	80.8692	81.4312	84.0172
BOK	2.61193	5.16755	2.69491	5.18087	4.28026	5.84698	1.26606	1.04713	1.26734	0.399322	0.51493	0.320573
THAP4	43.5002	42.4255	41.8885	54.1963	53.8123	57.0079	42.1386	46.1726	39.9523	30.428	30.4852	31.7247
ATG4B	46.359	49.4193	45.966	53.038	50.4574	49.9937	50.5651	50.9611	51.8823	49.7384	48.1884	48.28
DTYMK	91.5387	101.77	88.3765	41.2829	39.0474	43.093	47.055	50.8224	45.8019	40.7592	37.5726	35.0428
ING5	18.1743	13.5918	17.4609	4.97342	5.17347	5.13336	7.33925	4.47182	7.27199	11.1282	10.2369	10.2447
D2HGDH	11.8976	11.4322	12.1945	14.4672	15.2817	15.1626	14.8657	8.84809	15.6724	13.0078	12.8161	12.9375
GAL3ST2	0.02655	0.0140547	0.0442166	0.0411603	0	0.0261509	0.0235939	0	0.0520553	0.0125577	0.0259093	0.0293274
GM9994	0.286941	0.303795	0.212389	0.494271	0.564266	0.502451	0.198328	0.0562397	0.843889	0.482556	0.591148	0.281741
GM6086	0.0279236	0	0.0516713	0.0673397	0.0457594	0.0366719	0.0909868	0.0328376	0.0821227	0.0440247	0.127166	0.113097
NEU4	0	0	0	0	0	0	0	0	0	0	0	0
PDCD1	0	0	0	0	0	0	0	0.0345306	0	0	0	0
4930440C22RIK	0	0	0	0	0	0	0	0	0	0	0	0
FAM174A	7.76413	8.08725	8.22213	16.7717	15.8851	16.9904	20.2528	17.1275	19.7579	19.4556	20.403	18.4005
ST8SIA4	0.126446	0.140918	0.177334	0.426447	0.608546	0.537511	0.130109	0.0234786	0.0587169	0.0251818	0.0259778	0.0147024
4930598F16RIK	0	0	0	0	0	0	0	0	0	0	0	0
1700063A18RIK	0	0	0	0	0	0	0	0	0	0	0	0
4930533P14RIK	0	0	0	0	0	0	0	0	0	0	0	0
SLCO4C1	0	0.0167083	0.0525649	0	0.0155169	0	0	0	0	0.0298574	0.0462017	0.0348645
PANCT2	0.0771624	0.102118	0.0642535	0.0398748	0.113804	0.0855029	0.0428569	0.0510421	0.0756443	0.310221	0.169426	0.266357
SLCO6B1	0	0	0	0	0	0	0	0	0	0	0	0
SLCO6C1	0	0	0	0	0	0	0	0	0	0	0	0
D1ERTD622E	34.5931	33.9515	33.2602	16.8426	16.7014	16.6764	19.7423	13.0465	19.1003	18.3004	17.9901	18.1686
PPIP5K2	65.6615	51.4363	62.1894	23.6753	28.6612	22.8169	35.4012	12.3102	34.3833	31.0472	31.0618	34.3127
GIN1	14.6791	11.6412	15.5168	7.23171	8.49969	7.34775	7.63273	4.88157	6.67797	9.33319	8.6708	7.93353
PAM	47.0623	53.4433	45.2694	87.1262	86.255	71.3147	134.444	94.2973	146.073	186.701	169.195	188.21
B230216N24RIK	0.192431	0.0679111	0.071217	0.23203	0.157672	0.221129	0.427514	0.424304	0.282968	0.273051	0.344277	0.318842
1810006J02RIK	0	0	0	0	0	0	0	0	0	0	0	0
SLCO6D1	0	0	0	0	0	0	0	0	0	0	0	0
CNTNAP5B	0.0368951	0	0.0819273	0.0991438	0.079809	0.0872174	0.0786894	0.0065082	0.108508	0.00698033	0	0.0163019
GM20268	0	0	0	0	0	0	0	0	0	0	0	0
CDH20	0	0	0	0	0	0	0	0	0	0	0	0
RNF152	0.124031	0.136005	0.0836083	0.604321	0.740424	0.863891	0.220442	0.0781381	0.247524	0.280752	0.172911	0.151685
PIGN	50.7477	43.116	50.7917	43.6049	45.9835	44.104	44.4584	13.4576	45.6777	38.6978	34.2467	37.3114
2310035C23RIK	28.3529	21.1319	28.5154	19.307	19.6526	19.3567	18.4701	7.55077	19.2449	25.393	22.3764	23.8926
TNFRSF11A	0	0.0557542	0.0167052	0.0155505	0.0443817	0.0222299	0.0200562	0	0.0295001	0.0569323	0.102781	0.12465
ZCCHC2	19.3808	15.4884	18.8613	10.742	12.2989	10.1535	12.1689	5.97125	12.3791	12.2188	13.5955	12.4077
GM20753	0	0	0	0.143293	0.0681605	0.341402	0.0616039	0.122283	0.0679584	0.262307	0.473546	0.076574
PHLPP1	23.8419	22.9159	23.1037	16.7922	18.452	17.3627	17.0786	8.43968	19.6533	25.6627	27.09	26.4454
BCL2	6.84524	5.14857	6.55927	1.75607	1.89626	1.80822	1.95249	0.762212	1.31627	1.15929	1.07681	1.1973
MIR3473F	0	0	0	0	0	0	0	0	0	0	0	0
KDSR	7.89183	10.8061	6.84585	24.7142	26.3932	24.8663	28.5879	19.0488	26.7595	28.5748	26.618	27.6101
VPS4B	116.459	101.808	119.905	110.698	109.876	104.007	113.446	63.3342	114.225	107.436	105.379	106.857
SERPINB5	238.335	277.923	220.903	354.075	342.061	330.113	238.514	184.525	253.096	136.715	135.977	134.717
SERPINB12	0.108878	0.207491	0.145061	0.360091	0.278338	0.300276	0.212862	0.0768231	0.128083	0.041198	0.297502	0.144321
SERPINB13	0	0	0	0	0	0	0	0	0	0	0	0
SERPINB3A	0	0	0	0	0	0	0	0	0	0	0	0
SERPINB3D	0	0	0	0	0	0	0	0	0	0	0	0
SERPINB3B	0	0	0	0.0478522	0.0227619	0	0.0411448	0	0	0	0	0
SERPINB3C	0	0	0	0	0	0.0224308	0	0	0	0	0	0
SERPINB11	0.111185	0.0470861	0.123446	0.137895	0.0437286	0.0438055	0.474267	0.353029	0.675784	1.28316	1.45393	1.62117
SERPINB7	0.100108	0.148382	0.133376	0.0827714	0.039372	0	0.142339	0.0353174	0.176649	0.0189397	0.136769	0.22116
SERPINB2	10.4095	7.28865	12.0287	0.190754	0.0907364	0.181792	0.623262	0.293012	0.47043	0.314268	0.126079	0.244648
SERPINB10	1.30987	1.23781	1.1298	0.0671302	0.0638639	0.0533134	0.153922	0	0.0848993	0.112645	0.105642	0.119578
SERPINB8	7.66181	6.9443	7.42263	15.8968	16.5916	17.7295	12.8417	8.04429	12.8713	9.57322	9.80856	8.66632
D830032E09RIK	0	0	0	0	0	0	0	0	0	0	0	0
CDH7	0	0	0	0	0	0	0	0	0	0	0	0
CDH19	0.235046	0.0523898	0.206026	0.49864	0.328416	0.621431	0.318811	0.0654656	0.472972	0.456396	0.651907	0.491939
DSEL	9.78114	10.3279	9.88439	13.5443	13.9617	12.7142	17.9318	6.97894	17.1658	12.7937	11.7587	12.2019
CNTNAP5A	0	0	0.0107144	0	0	0	0	0	0	0	0	0.0106597
TSN	81.2302	76.6298	81.1192	59.9138	57.0964	57.6498	67.0046	47.2473	62.3261	65.3397	63.5714	68.4012
NIFK	135.723	84.92	133.769	43.0263	48.2878	42.2819	60.0399	59.1492	58.7435	64.0628	68.4237	66.962
CLASP1	41.398	33.8384	43.5075	39.0523	43.426	39.8779	36.4775	15.4022	38.3918	31.496	33.7135	34.3826
2900060B14RIK	0.316421	0.134002	0.632364	0.130812	0.560012	0.997327	0.618619	0.279079	0.310195	0.11973	0.617571	0.768947
TFCP2L1	1.09226	0.944975	1.18555	5.24002	6.58797	4.38766	102.689	54.1312	135.568	506.758	530.822	582.09
GLI2	0.0112643	0	0.0125065	0.0349261	0.0221512	0.0388327	0.0400407	0.009935	0.0662564	0.0159836	0.0274813	0.00622135
MIR6346	0	0	0	0	0	0	0	0	0	0	0	0
INHBB	22.4464	19.9669	25.4441	74.4424	81.2879	65.2776	112.053	76.6915	116.126	83.0277	72.4989	77.7673
RALB	74.3832	91.3474	75.7695	147.718	155.572	151.858	183.043	162.308	164.497	121.454	118.93	113.982
TMEM185B	18.4631	16.5087	17.5198	17.7162	18.1012	18.396	19.7411	15.2952	21.0969	20.3322	18.5387	19.9374
3830432H09RIK	0.0469519	0.0497096	0.0521294	0.921997	0.769418	1.15616	0.959658	1.06288	1.27345	0.47376	0.458189	0.380332
EPB4.1L5	8.6477	6.97644	8.67529	8.42347	8.15748	7.89799	11.5945	6.14302	11.3704	12.2499	12.085	12.1276
PTPN4	30.0415	23.6037	30.0206	26.8337	34.6373	29.6848	24.328	2.38621	28.4588	33.8407	35.8191	36.5539
TMEM177	7.02362	6.42764	6.62586	6.10857	6.7028	6.55632	7.46545	6.38705	7.21171	7.2955	6.19336	7.60623
CFAP221	0	0	0	0	0.0295878	0.0296398	0.0534833	0.0132704	0	0.0142331	0.014683	0
SCTR	0	0	0	0	0	0.0193615	0.0174683	0	0	0	0.0191826	0
TMEM37	0.0371491	0	0.0412456	0.153579	0	0	0	0.06553	0.0728365	0	0	0.0410352
DBI	283.989	460.774	247.233	1173.94	1162.54	1133.72	1642.88	2583.15	1859.77	2321.95	2218.92	2181.37
3110009E18RIK	5.34272	4.59133	4.50668	4.76887	5.18496	5.1599	3.6688	5.81376	4.31932	4.59458	3.58871	3.56396
STEAP3	39.6833	63.7073	38.3423	363.336	377.204	332.971	351.731	309.086	412.808	197.742	235.824	235.409
C1QL2	0	0	0	0.0195237	0.0185737	0	0.0167871	0	0	0	0.0184345	0
MARCO	0	0	0	0.0196712	0	0	0	0	0.0186586	0.0360094	0	0.0210241
EN1	0	0	0	0	0	0	0	0	0	0	0	0
CELRR	0	0	0	0	0	0	0	0	0	0	0	0
INSIG2	21.3404	20.4807	24.4323	35.2788	32.9082	36.1542	32.9943	20.8192	33.8767	47.4305	46.6699	52.1908
CCDC93	12.7098	10.7276	12.4349	14.2607	16.1471	13.5753	15.5424	7.44418	15.6551	17.8302	18.5107	18.6809
HTR5B	0	0	0	0	0	0	0.0335071	0	0	0	0.0367954	0
DDX18	90.3946	79.7147	84.0241	44.4817	46.1164	43.6659	52.2646	39.9005	46.4078	45.862	46.869	46.576
DPP10	0	0	0	0	0.0320929	0	0.00725143	0	0.00799943	0	0.0238892	0
ACTR3	434.147	363.726	435.889	283.84	274.318	266.357	271.246	183.016	262.782	256.344	245.261	253.862
SLC35F5	23.8002	25.9066	23.9696	66.4723	64.7971	62.5897	80.7615	52.7866	83.088	82.0201	78.6074	83.3532
GPR39	10.397	11.2011	11.372	5.22762	6.8106	5.5494	3.53346	2.1562	2.80982	1.76769	2.79705	2.42109
LYPD1	0	0.0195693	0	0.0191034	0	0	0	0.0326047	0	0	0.0180377	0.0204172
NCKAP5	0.00497572	0.0105359	0.0165732	0.0668532	0.088062	0.0637121	0.0884344	0.0307196	0.102434	0.0706031	0.101969	0.049466
MGAT5	9.67642	11.5592	8.50017	22.8447	27.6691	23.5817	38.647	3.5104	41.9414	62.8661	57.4177	56.9928
TMEM163	0	0	0	0	0	0	0	0	0.0147149	0	0.014648	0
ACMSD	0.0328099	0	0	0	0.0322601	0.0161584	0	0	0	0.0310372	0.0160091	0
2900009J06RIK	0.895661	1.4655	0.723221	2.69292	0.960711	2.6466	0.940655	1.22085	1.27715	0.924292	1.43026	1.529
CCNT2	31.9103	29.1175	30.6663	32.858	37.1158	35.1901	33.1728	11.6921	35.6988	39.5431	40.709	40.379
MAP3K19	0.0287962	0.0304875	0.0106572	0.119047	0.17932	0.0756357	0.0341201	0.0169319	0.0470495	0.217922	0.159241	0.190851
RAB3GAP1	41.5311	39.548	44.6308	51.3375	52.5622	46.5269	59.4952	32.1854	60.5266	70.621	70.6156	77.1336
ZRANB3	6.82931	8.15048	7.06585	7.35767	7.68152	7.73825	5.65549	2.90329	4.34569	4.25982	4.57436	4.36333
R3HDM1	69.3823	65.3361	68.9263	50.635	55.4819	49.9109	48.0587	23.2326	51.3843	45.6471	49.9631	50.1713
MIR128-1	0	0	0	0	0	0	0	0	0	0	0	0
UBXN4	61.7154	54.903	63.4787	73.1053	78.243	69.3432	86.5397	58.7714	88.0463	94.0765	97.6807	95.3034
LCT	0	0.0259485	0.0136058	0.0126654	0.00602457	0.00603516	0.00544504	0	0.0120134	0.00579619	0.0239176	0
MCM6	199.113	227.699	175.219	31.3617	30.937	34.0957	31.0859	18.9985	23.9128	19.7977	14.0308	12.5443
DARS	96.2811	86.5994	93.6405	78.0636	79.018	79.4683	73.1565	44.8632	70.6057	69.3134	73.5616	74.9328
CXCR4	0.0208272	0.0220505	0.0924957	0.452037	0.634825	0.471827	0.203592	0.055108	0.142922	0.0788077	0.121948	0.0920239
THSD7B	0.024168	0.0255875	0	0.00624458	0.0594075	0.0119024	0.0107386	0	0.00592313	0.0228622	0	0.00667405
CD55B	0	0	0	0	0	0	0	0	0	0	0	0
CD55	0.299134	0.443385	0.431756	0.386455	0.235297	0.604008	0.544948	0.342982	0.439873	0.452754	0.364895	0.396512
ZP3R	0	0	0	0	0	0	0	0	0	0	0	0
C4BP	0	0	0	0	0	0	0	0	0.0196693	0	0	0
C4BP-PS1	0.150321	0	0	0.103574	0.197069	0.0493538	0.22264	0.0441936	0.147363	0.0473996	0.0977957	0.110697
PFKFB2	16.4026	13.1295	17.649	22.1922	24.3673	21.4435	19.8737	5.79091	21.4425	29.1642	29.7565	31.6607
YOD1	12.8239	10.2011	10.5333	7.68296	8.98839	7.38032	7.84303	1.01873	9.27143	10.3847	9.37379	10.2506
AA986860	4.66251	5.54137	4.68639	7.86585	8.47918	8.05914	7.82512	6.15122	7.77924	7.8506	7.57911	7.57475
FCAMR	0	0	0	0.0612989	0.0194388	0.0194729	0.105413	0	0.0193811	0.355336	0.231516	0.152868
PIGR	0.0196314	0	0.0435924	0.0507241	0.849306	0.164359	1.22992	0.398236	1.01999	194.157	267.106	218.932
FCMR	0	0.0268274	0	0	0	0	0	0	0	0.02397	0	0.0279898
IL24	2.8437	2.65231	3.30763	0.594808	0.565867	0.566861	0.240675	0.0298584	0.497814	0.0640489	0.0660734	0.037395
IL20	0	0	0	0	0	0	0	0	0	0	0	0
IL19	0.110794	0.156401	0.32803	0.152678	0.0726246	0.363761	0.0656386	0.0651456	0	0.0349358	0.10812	0.0407946
IL10	0.0289285	0.0612552	0	0.0298985	0	0.0284937	0	0	0	0.0273655	0	0
MAPKAPK2	148.091	140.053	153.865	109.111	107.926	111.203	105.143	87.3875	102.167	103.765	96.1868	103.349
DYRK3	11.7062	11.6987	11.4989	2.61949	2.25897	2.67602	0.939816	0.884513	1.19764	5.9508	6.61933	6.90848
EIF2D	68.5991	66.078	70.4303	47.8629	46.9129	49.5466	43.1919	43.9006	42.2937	42.5906	42.9548	42.8627
RASSF5	4.62688	2.8546	5.29725	3.22241	3.382	3.49724	3.09612	1.74194	3.16531	5.46848	5.22987	5.94433
IKBKE	7.51366	8.72924	9.3899	19.481	20.0525	18.7632	21.8866	17.5505	20.7793	11.6044	12.2244	11.5179
SRGAP2	25.6429	23.0744	25.7472	18.8583	21.6232	18.8517	20.1695	9.88884	20.9786	17.3896	16.6506	16.7969
FAM72A	7.66381	5.05459	7.19373	1.22429	1.53531	1.60872	0.972932	0.823156	1.09089	1.34128	1.43623	0.951628
AVPR1B	0.00910816	0	0	0	0	0.0179425	0.00809405	0.0160665	0	0	0	0.010061
CTSE	0	0	0	0	0	0.0351064	0	0.0157179	0	0.0168582	0	0.0393706
RAB7B	7.03801	8.83068	6.40092	13.2479	11.7199	11.6225	13.3605	5.87725	14.5331	8.42841	8.75327	8.10507
SLC26A9	0.477448	0.340656	0.345715	0.67582	0.744991	0.705407	0.534972	0.329558	0.691906	0.530198	0.557086	0.424207
PM20D1	0	0	0	0	0	0	0.00948422	0	0	0.0201917	0	0
SLC41A1	13.0258	15.5759	13.5353	44.4257	42.0489	42.3624	47.0729	25.1577	50.3632	56.8255	57.4036	59.3983
RAB29	7.77183	9.20227	7.95968	15.0813	15.9382	16.0599	15.5608	16.5911	13.683	13.9536	13.466	13.1401
NUCKS1	152.864	148.056	147.812	60.7617	60.9375	63.9198	49.7278	26.7352	43.7935	50.7479	47.3623	49.9617
SLC45A3	2.406	3.10955	2.93603	6.44069	5.87156	6.49035	6.95368	5.41028	8.01095	11.2775	11.1157	13.4201
ELK4	53.3622	47.2238	54.2874	53.2793	62.4758	53.3305	36.2813	4.73824	41.0327	33.9479	35.3524	36.8559
MFSD4	0.03114	0.0247267	0.0345739	0.313795	0.497545	0.521424	0.657231	0.205988	0.541861	0.567056	0.805298	0.515963
CDK18	31.2689	36.2045	34.9648	39.4576	36.3304	35.3192	23.4225	21.2775	27.1761	20.8381	23.494	24.1272
LEMD1	0	0.0406914	0.0426722	0.158891	0.18895	0.0378563	0.0341548	0.0338983	0	0	0	0
MIR135B	0	0	0	0	0	0	0	0	0	0	0	0
KLHDC8A	1.4514	0.927609	1.4051	1.08846	0.922378	1.0286	1.23475	1.21767	0.928319	0.586027	0.475004	0.527893
NUAK2	7.47892	9.91051	7.12506	8.49019	8.30244	8.94675	9.71206	6.97932	9.42489	10.4183	9.53508	9.76698
TMCC2	4.5647	3.26097	4.79743	8.7828	8.79121	7.92272	7.85694	6.24421	8.63481	6.59238	6.04392	6.315
DSTYK	18.5027	13.1682	19.6628	34.5586	33.1389	31.3671	29.8828	14.0803	33.5569	26.067	22.9933	25.0397
RBBP5	48.0788	40.9247	46.0583	30.7584	33.1279	30.2866	28.8782	16.2114	29.0323	30.9471	31.2554	32.0005
TMEM81	1.19284	1.4466	0.890948	1.68114	1.89789	1.8585	2.25498	2.98406	3.01912	3.69292	2.45511	3.59353
CNTN2	8.35255	4.17406	8.89087	1.32274	1.32071	1.17473	0.697187	0.17823	0.435048	0.224893	0.193335	0.166319
NFASC	0	0	0.00404151	0.0188108	0.0035791	0.017927	0.0161741	0.0160526	0.00356849	0.024104	0.0568363	0.0241254
GM10538	0	0	0	0	0	0	0	0	0	0	0	0
LRRN2	0	0	0	0	0	0.0222431	0.0100341	0	0	0	0	0
MDM4	37.3183	26.244	39.5911	19.46	22.4128	20.9796	23.1832	10.3174	25.4789	22.5934	22.7511	23.806
PIK3C2B	2.93039	2.39624	3.17418	5.75197	7.91768	6.12469	6.71991	2.49211	6.55826	9.90279	9.93216	9.94767
PPP1R15B	112.842	85.962	113.68	40.7594	44.9187	40.7223	45.3022	19.5233	45.8261	73.4676	75.4864	77.4761
PLEKHA6	0.212792	0.171649	0.247507	0.445089	0.483211	0.583867	0.207109	0.160868	0.258273	0.599089	0.558696	0.520471
GM19461	0	0	0	0	0	0	0	0	0.0119015	0	0	0
GOLT1A	0	0	0	0	0	0	0	0	0	0	0	0
KISS1	0	0	0	0	0	0	0	0.0671814	0	0	0	0
REN2	0	0	0	0	0	0	0	0	0	0	0	0
REN1	0	0	0	0	0	0	0	0	0	0	0	0
ETNK2	0.397691	0.210524	0.791102	0.56516	0.553954	0.538606	0.132529	0.160764	0.227422	0.0627005	0.0646824	0.0183039
SOX13	3.74489	5.01836	3.39756	7.70774	8.02705	7.56691	10.6019	9.05951	12.3772	9.241	10.3997	11.3817
SNRPE	256.709	251.868	249.635	189.126	183.17	192.795	162.275	230.613	136.632	135.257	132.264	125.538
ZC3H11A	116.572	94.7261	122.048	91.4834	105.947	94.1563	115.18	63.3103	113.176	99.3469	111.242	111.627
ZBED6	79.2058	59.4602	76.9737	52.5077	70.3703	57.5397	56.8487	2.24276	61.0928	52.3277	59.6589	61.5282
LAX1	0.382427	0.253055	0.318449	1.25162	1.25339	1.67936	1.81252	1.33513	1.70269	0.30147	0.482049	0.457636
ATP2B4	43.3803	44.4762	48.8772	65.9501	71.1053	74.0351	53.4506	20.4786	55.8821	23.296	24.5615	25.8792
MIR6903	0	0	0	0	0	0	0	0	0	0	0	0
OPTC	0	0	0	0	0.0358393	0.0538535	0	0	0	0.0344807	0.053356	0.0402632
PRELP	0.513951	1.04385	0.570625	6.40672	5.2287	6.06438	8.01603	5.09729	7.72211	137.173	126.677	114.354
FMOD	0.0264293	0.0839447	0.0146718	0.47802	0.155918	0.104128	0.481476	0.641032	0.803188	0.462523	0.386873	0.394119
BTG2	23.5654	8.01809	31.1982	15.4391	13.5914	16.1139	15.8015	10.4192	14.6684	61.4975	57.1989	61.0223
CHIT1	7.6541	9.85404	8.99669	21.1797	17.4198	20.0237	12.842	15.6619	13.0461	2.27836	2.46988	2.32225
CHIL1	1.63291	1.16044	1.49012	9.03939	11.8107	10.3773	8.74637	7.83235	6.6005	6.72889	7.37816	6.74545
MYBPH	0	0	0	0	0	0	0.0183566	0	0	0	0.020158	0
ADORA1	0.0259705	0.0137479	0.0216258	0.020131	0.0255353	0.00639505	0.0115395	0.00572641	0.0318245	0.0245673	0.00633596	0.00717182
MYOG	0	0	0	0	0	0	0	0	0	0	0	0
PPFIA4	0	0.019779	0	0.0193081	0.0183686	0.0490691	0.0276695	0.0384463	0.0793614	0.0235631	0.00607697	0.020636
TMEM183A	58.6321	64.1837	60.9413	37.9261	39.574	37.2715	42.7702	34.384	43.407	51.968	51.3885	55.3233
4933406M09RIK	0	0	0	0	0	0	0	0	0	0	0	0
CYB5R1	327.06	164.796	341.921	45.6513	40.6429	47.5573	52.488	52.1553	50.1804	69.8081	61.8337	71.6337
ADIPOR1	108.236	115.625	107.75	141.705	136.599	140.854	131.755	114.52	139.341	132.613	127.651	134.022
KLHL12	24.6354	20.0123	24.4646	14.6977	15.3425	14.4613	15.4739	10.8224	13.8832	16.3041	14.8929	14.7554
RABIF	46.2085	41.919	44.9231	32.0511	31.0416	32.1219	37.7216	29.1716	37.0941	41.1759	39.5414	43.5436
MGAT4E	0.0206226	0.0436677	0	0.170513	0	0.060938	0	0	0.0606507	0.0195083	0	0.0227799
KDM5B	31.4239	25.9045	36.0543	93.503	94.5079	92.8311	82.8855	46.8042	90.2183	66.1914	65.34	71.4228
SYT2	0	0	0	0	0	0	0	0	0.0109384	0	0	0
PPP1R12B	2.81599	2.09537	2.79419	2.17175	2.13215	1.90727	2.00848	0.188564	1.99409	2.95275	2.68842	2.94863
UBE2T	14.5387	17.7933	13.9576	6.2724	5.31147	8.07974	3.37816	1.64698	1.86331	2.23962	1.62705	1.87853
LGR6	0.239844	0.187688	0.162091	0.258663	0.215318	0.205425	0.565283	0.156355	0.623593	0.236749	0.274762	0.126707
PTPRV	0.124278	0.0789466	0.0620923	0.218357	0.27494	0.140772	0.21536	0.175379	0.249758	0.0705381	0.0485118	0.0480477
PTPN7	0.0810246	0.110293	0.154216	0.011963	0.0569048	0.0342029	0.051431	0.0204179	0	0.0437981	0.0112956	0.0127858
ARL8A	51.7652	53.466	53.0866	74.8829	83.5927	73.6822	91.6286	79.5656	100.144	132.626	148.472	140.376
GPR37L1	0	0	0.0186182	0.0346626	0.016488	0.016517	0	0	0	0.015863	0	0
ELF3	25.5586	12.6399	34.9207	18.3132	16.3077	16.9132	15.4273	18.5437	14.6853	20.7824	21.5683	24.4346
RNPEP	48.8964	52.794	48.0538	61.4474	64.9153	62.6682	72.8242	72.4221	69.8736	73.8084	71.1903	72.2571
TIMM17A	125.908	133.478	118.293	92.0616	89.8507	94.0262	102.736	111.558	97.9854	138.007	132.198	138.579
LMOD1	0.00958413	0	0	0.118866	0.301552	0.254882	0.195892	0.346576	0.300658	0.85223	0.673406	0.868111
SHISA4	3.14309	2.52099	4.08893	4.72506	5.55651	5.47247	5.24772	5.0683	4.88644	13.7551	15.5531	15.3956
IPO9	75.5188	89.0178	71.4158	52.7353	55.1374	52.6982	44.3043	22.2984	43.5824	37.6993	37.4779	40.2739
NAV1	12.0707	14.4214	12.3734	52.9848	59.9999	45.5461	39.7015	19.8857	53.4223	21.2583	24.3473	27.3697
MIR1231	0	0	0	0	0	0	0	0	0	0	0	0
CSRP1	284.934	251.275	318.914	363.736	334.474	354.594	436.54	559.602	474.559	784.548	819.303	839.231
PHLDA3	186.688	180.748	190.805	193.587	165.784	191.442	211.08	289.881	207.126	133.432	122.218	129.238
TNNI1	0.440887	1.07719	0.903701	4.52165	2.93445	3.6077	2.41107	2.75191	1.09716	1.89283	1.6879	2.62235
LAD1	399.651	472.415	395.971	361.41	381.358	342.925	311.761	342.208	348.017	205.298	239.426	224.9
TNNT2	162.861	184.823	167.754	135.075	122.213	128.194	51.5679	66.298	47.0658	14.2158	15.4897	13.8665
PKP1	449.502	508.172	447.894	571.566	565.551	584.679	438.02	313.989	486.291	126.856	136.808	142.446
IGFN1	0	0	0	0.00868105	0.00412933	0	0.00373212	0	0.00411709	0	0.0122951	0.00463904
TMEM9	47.107	53.6224	52.4694	61.5387	59.3298	66.8341	61.9683	73.0609	58.9846	51.8934	48.6038	49.3401
ASCL5	0.0666325	0.0705461	0	0	0	0.131262	0	0	0	0	0	0
CACNA1S	0	0.0191692	0.00670077	0.0062376	0	0.00594453	0	0.021292	0.00591651	0.0114183	0	0.0133332
GM15850	0.223114	0.0787394	0.247717	0.230595	0.219375	0.293014	0	0	0	0	0	0.0821513
KIF21B	12.8228	6.1322	15.9066	8.49973	8.05765	9.90001	1.83721	0.705247	1.84395	2.39072	2.84229	2.93809
5730559C18RIK	43.2352	44.4868	46.0398	69.6192	70.0414	70.2757	63.1813	54.4565	64.5849	29.3814	28.7071	29.5994
GPR25	0	0.0612239	0.0214014	0	0.0189528	0.0189861	0	0.034002	0.0377932	0.054703	0.0188107	0
CAMSAP2	72.8181	57.6347	73.1375	43.7792	50.6665	43.4395	48.4707	16.2457	52.6136	48.9239	50.7532	54.1519
9230116N13RIK	0.77471	1.06818	0.600097	1.15448	1.43488	1.59711	0.688454	0.873968	1.14803	0.852153	1.07249	0.855752
DDX59	16.5672	16.5708	18.5635	15.4752	15.2558	14.7649	14.8281	10.4692	14.4958	13.298	13.7018	14.348
KIF14	26.4075	21.2807	28.263	6.54224	6.82092	8.81449	1.67911	0.335698	1.04387	1.14873	0.782659	0.575591
ZFP281	15.5348	14.3847	14.902	23.4284	24.6547	22.3277	30.9773	14.8322	32.8807	26.403	26.6225	28.5207
GM19705	0.309044	0.654391	1.37249	3.75302	3.41848	3.19619	3.77623	5.24702	4.31724	4.38519	3.16666	3.49907
PLATR22	0.220571	0.0667217	0.349848	0.716466	0.805533	0.993168	1.14807	0.500247	1.11205	0.834612	0.922493	1.04419
NR5A2	0	0	0	0	0.0192624	0	0.00870473	0	0.0192053	0	0	0.0216401
MIR181A-1	0	0	0	0	0	0	0	0	0	0	0	0
MIR181B-1	0	0	0	0.976185	0	0	0	0	0	0	0	0
PTPRC	0.0200039	0.0494171	0.0222097	0.0206746	0	0.0131355	0.00592554	0	0.0326839	0	0.0195212	0
ATP6V1G3	0	0	0	0	0	0	0	0	0	0	0	0
NEK7	94.0026	93.178	97.0658	64.0697	66.7021	61.8334	66.3802	25.7884	68.661	72.8695	71.4049	79.1635
GM5833	0.0195755	0	0	0.0202318	0	0	0	0	0	0	0	0
LHX9	0	0.0208694	0.00729509	0	0.00646043	0.0388307	0.0233559	0	0.0386477	0.0124311	0	0.0217737
2310009B15RIK	16.0783	17.0927	11.7539	23.6609	20.2327	25.6775	22.2848	33.0302	20.6268	17.3376	19.177	17.8333
DENND1B	9.9394	8.13177	10.1726	7.9053	9.28575	8.28592	8.67927	2.32488	9.33842	16.0876	16.1127	17.3648
4930596I21RIK	0	0	0	0	0	0	0	0	0.080516	0.155388	0	0
CRB1	0.00803501	0	0	0.0166088	0.0158007	0.0474855	0.0142808	0.0283471	0	0.0152017	0	0
4933436E23RIK	0	0	0	0	0	0	0	0	0	0	0	0
ZBTB41	33.8318	27.486	32.3254	16.2643	18.2539	17.298	18.5296	4.7859	18.687	19.2373	19.2458	21.0511
ASPM	38.0946	30.322	37.3295	14.0263	15.9494	20.9638	2.76325	0.476222	2.26744	2.01772	1.41631	1.16324
F13B	0	0	0	0	0	0	0	0	0	0	0	0
CFHR1	0	0	0	0.0450894	0	0	0	0	0	0	0	0
GM4788	0	0	0	0	0	0	0.0348883	0	0	0	0	0
CFHR2	0	0	0	0	0	0	0	0	0	0	0	0
CFH	0	0.00916372	0	0.0178911	0	0	0.0538417	0	0.0678806	0.0900646	0.0591255	0.0860471
KCNT2	0	0	0	0	0	0	0.033939	0	0	0	0	0
4930590L20RIK	0	0	0	0	0	0	0	0	0	0	0	0
CDC73	86.0716	59.4468	84.6768	39.3244	44.5132	39.4222	41.4348	15.79	42.0854	42.5455	43.8215	46.517
B3GALT2	0	0	0	0	0.00811435	0	0	0	0	0	0	0.00911595
GLRX2	10.5036	9.5656	10.0987	11.6619	12.7277	10.2959	14.4108	14.0792	14.4178	18.5595	18.2763	18.8189
TROVE2	40.0249	35.2061	38.9499	38.1787	42.7707	40.439	31.5797	8.7241	32.9471	23.456	24.7935	26.1883
UCHL5	73.2548	73.2138	70.3192	26.6223	26.4508	25.4116	27.5703	22.9167	23.9312	33.6926	35.1958	36.1865
RGS2	24.0319	6.08835	28.5361	2.32286	2.08638	2.23846	1.43937	1.18493	1.50168	2.90998	3.25927	3.09286
RGS13	0	0	0	0	0	0	0	0	0	0	0	0
RGS1	0	0	0	0	0	0	0	0	0.0278476	0.0268716	0	0
RGS21	0	0	0	0	0	0	0	0	0.0447852	0.0864312	0	0
RGS18	0	0	0	0	0	0	0	0	0.0996163	0	0	0
BRINP3	323.41	310.779	318.595	374.705	407.873	340.136	652.42	416.704	674.495	594.295	548.42	564.762
PLA2G4A	54.9807	42.5037	56.3003	35.0031	32.1312	33.8952	24.6386	11.8828	24.8008	19.656	20.3982	22.6241
MIR7652	0	0	1.07556	0	1.905	0	0	0	0	0	0	0
PTGS2OS	4.73204	5.23709	4.81954	4.22557	4.52867	3.70388	1.46901	0.55648	1.10098	0.501353	0.455629	0.543614
PTGS2	636.911	173.036	807.483	54.9961	46.9161	49.1442	20.8249	6.63224	21.8471	14.4164	14.4274	21.9085
PTGS2OS2	15.3504	15.1746	13.2932	6.51163	6.91859	6.86677	2.13566	0.802019	1.59186	0.471062	0.485952	0.645723
PDC	0	0	0	0	0	0	0	0	0	0	0	0
2310030A07RIK	0	0	0	0	0	0	0	0	0	0.058589	0	0
BC003331	28.4462	21.9122	29.1117	31.6041	30.9944	32.1738	29.1418	14.6773	28.1036	32.1455	32.9228	31.9626
TPR	145.363	133.546	139.136	90.3882	108.092	95.2894	87.4261	38.1018	92.6817	94.347	105.518	102.37
PRG4	0.0441569	0.00935008	0	0.018255	0.0173668	0.113082	0.0313924	0	0	0	0.00861827	0.00975522
HMCN1	0	0.0021841	0.0114521	0.0362458	0.0141986	0.0264151	0.00916625	0.00545845	0.0202235	0.00390295	0.00603947	0.0159512
C730036E19RIK	0	0	0	0	0	0	0.0127175	0	0.0140293	0	0.0139655	0
IVNS1ABP	176.587	148.111	181.495	66.7302	67.0823	71.0197	41.1928	17.9874	36.0814	50.1074	47.5483	52.1971
SWT1	9.68206	7.07736	9.60614	8.17568	8.54757	7.86257	8.55829	4.30606	8.37076	10.2892	9.86054	11.2638
TRMT1L	25.1635	19.8422	25.4042	40.3661	45.023	39.0839	43.8164	27.6579	41.3317	39.8429	39.6912	37.771
MIR7682	1.30278	0	2.16966	2.69292	0	0.6416	1.15773	0.574517	0.638575	0	0	1.43906
RNF2	52.7282	39.7354	53.0153	40.1177	40.9751	37.1145	50.4499	24.6944	49.1589	56.7721	55.34	55.0603
FAM129A	127.93	53.4547	138.087	36.3709	39.1468	38.3276	59.8266	14.1697	49.3549	85.4331	81.7782	76.4202
EDEM3	23.5528	21.193	23.9524	24.1474	27.1069	22.2634	41.7897	10.1116	46.1509	93.7155	93.5067	103.378
1700025G04RIK	3.22262	3.67436	3.20385	3.19857	2.85633	3.41836	6.05808	3.00287	4.02877	7.44538	6.43714	6.32795
TSEN15	50.9638	35.406	52.8782	17.9715	16.9658	16.371	17.8251	22.8132	17.439	18.3116	18.3693	16.7742
COLGALT2	0.17698	0.177513	0.144787	0.0385083	0.0641105	0.110097	0.14072	0.0575084	0.0821834	0.0528688	0.00908998	0.0308675
RGL1	1.3316	1.24516	1.59715	3.69679	4.119	3.57097	2.2544	1.01158	2.04863	1.92166	1.67888	1.69637
APOBEC4	0	0	0	0	0	0	0	0	0	0	0	0
ARPC5	148.294	181.675	141.429	262.752	253.786	256.056	274.734	233.254	262.268	308.729	297.187	303.966
NCF2	0.0145534	0	0	0	0.085857	0	0.0387991	0.0641795	0.0142671	0.0137671	0	0.112531
SMG7	96.702	72.6439	96.3484	43.3002	48.1711	41.8483	45.02	24.2297	48.8888	51.698	55.6771	54.3373
NMNAT2	0.242237	0.406806	0.408061	0.0949638	0.114982	0.139867	0.0816528	0.0515706	0.073698	0.0395084	0.0489086	0.0922681
LAMC2	121.404	126.831	126.052	109.384	103.832	93.2986	62.8507	39.1553	66.8164	39.2482	37.3687	34.1686
LAMC1	42.8415	42.7915	44.5169	34.4982	38.2148	34.9327	29.7991	11.9482	32.7806	32.0022	32.7042	32.8081
E330020D12RIK	0.0133642	0.0565966	0.0148379	0.0276246	0.0657012	0.105307	0.166267	0.0942964	0.117912	0.0379264	0.104334	0.0590489
SHCBP1L	0	0	0	0	0	0	0	0	0	0	0	0
DHX9	156.438	198.602	138.489	112.851	131.945	109.501	142.71	54.4291	143.083	142.624	145.294	149.082
NPL	0.242356	0.570201	0.478367	0.139157	0.0794315	0.106095	0.0239302	0	0.0263987	0	0.0525573	0.0297454
RGS8	0.305942	0.268778	0.346907	0.121098	0.0576029	0.0577042	0.0462772	0.0172236	0.0382881	0	0.0127047	0.00719036
C230024C17RIK	0	0	0	0	0.011132	0.0111516	0	0	0.011099	0	0	0
RGS16	0.194162	0.222696	0.28743	0.0167226	0	0.0318739	0.0143786	0.0142707	0	0.0153059	0	0
RNASEL	0.706699	0.983598	0.67002	3.30729	3.34156	3.74631	2.68141	0.721346	1.96162	1.89287	2.02245	1.64896
RGSL1	0	0	0	0.0107273	0	0.0102233	0.0184473	0	0.0203502	0.0392739	0.0303865	0
TEDDM2	0	0	0	0	0	0	0.0405975	0	0	0	0	0.0252315
TEDDM1B	0	0	0	0	0.0147002	0	0	0	0	0	0	0
TEDDM1A	0	0	0	0	0	0	0	0	0.0261748	0	0	0
MIR8114	0	0	0	0	0	0	0	0	0	0	0	0
GLUL	0.821025	1.1115	0.627633	4.59054	4.52598	4.87863	13.2048	5.15203	7.17788	20.5752	11.9131	9.38134
ZFP648	0	0	0	0	0.0197909	0	0	0	0	0.0190406	0.0196425	0
4930452N14RIK	0	0	0	0	0	0	0	0	0	0	0	0
4930532M18RIK	0	0	0	0	0	0	0	0	0	0	0	0
CACNA1E	0.00297556	0	0	0.00615065	0.00877707	0.0087925	0.00528851	0	0.0175021	0.00281478	0	0
IER5	84.1226	53.602	93.0911	47.239	45.8266	48.388	21.4895	18.8723	20.75	9.74906	9.86555	9.17612
MR1	10.1039	10.8249	10.8002	47.4669	52.2345	45.5779	27.3785	14.0114	27.516	28.261	30.8588	28.892
STX6	77.8659	69.7188	86.8276	117.158	121.458	117.979	137.287	92.7297	110.54	103.541	93.0945	96.1094
XPR1	29.3712	27.4576	30.1155	36.1281	39.881	34.2653	26.5047	7.96575	30.8314	31.5212	34.8499	36.1474
GM5532	0	0	0	0	0.021215	0	0	0	0	0	0	0
ACBD6	48.8697	43.9955	51.1267	50.3474	52.0868	46.2956	37.6369	54.9418	41.195	31.1753	32.3695	30.5367
LHX4	0	0	0	0	0.0401377	0	0	0	0	0	0	0
QSOX1	12.9383	15.5071	14.2277	24.8621	23.3761	23.0961	25.9922	25.1625	27.5934	26.9985	26.2065	30.2721
CEP350	21.3476	16.8211	21.4005	18.5451	23.1924	20.5402	18.4308	4.99567	21.1698	18.7627	22.24	21.4764
TOR1AIP1	33.3634	31.5474	33.839	30.8227	34.6118	28.6368	51.4995	26.0631	57.0871	66.8813	72.2595	68.7055
TOR1AIP2	46.2824	42.8553	47.4345	44.4302	46.6428	43.6872	49.0033	23.9458	49.0574	56.372	57.8311	58.3334
FAM163A	0	0	0	0	0	0.00956135	0	0	0	0	0.00947301	0.0107227
TDRD5	0.0108815	0	0	0	0.0106992	0	0.0193399	0	0.0106674	0	0	0.0240397
NPHS2	0	0	0	0	0	0	0	0	0	0	0	0
SOAT1	10.1143	12.4973	9.59034	15.7169	15.9769	16.6505	12.4614	6.60173	12.7018	12.4135	11.8736	12.4108
ABL2	41.0001	32.9024	41.5866	13.543	15.0441	13.4798	14.7251	4.88291	15.8327	14.1836	13.6547	14.3225
TOR3A	61.0409	46.6214	62.1244	61.9166	60.5522	56.9465	64.847	49.881	62.118	54.6369	69.8457	55.0266
FAM20B	53.5954	52.0618	56.3184	51.3752	52.0485	47.8814	58.8775	32.4178	65.0469	55.0341	57.4784	61.2699
RALGPS2	0.222457	0.196269	0.205823	0.125906	0.093741	0.161727	0.0658962	0.0560583	0.0778859	0.0450937	0.072363	0.035104
ANGPTL1	0	0	0	0.0178217	0.0169546	0	0	0	0	0.0163119	0.0504824	0
TEX35	0.0370036	0.0391769	0	0	0.0363834	0	0	0	0.145102	0.0350042	0.0361106	0.081749
RASAL2	30.6051	21.055	31.4956	14.1015	16.8099	13.313	21.6063	5.80797	25.5567	15.5039	14.6801	15.3164
2810025M15RIK	51.9879	53.1653	45.1789	29.6616	29.7118	32.0391	12.0912	16.6331	10.8568	7.51303	7.25645	6.6409
BC026585	0.02931	0.062063	0	0	0	0	0.0260466	0	0	0	0	0
SEC16B	0.0731238	0.0774186	0.0811873	0.151151	0.167763	0.0880302	0.115524	0.0716602	0.14337	0.153717	0.190291	0.215395
BRINP2	0.00921254	0.0195073	0.0204569	0.0285643	0.0181163	0.0272222	0.0245604	0.0162507	0.0451565	0.156866	0.161824	0.101763
ASTN1	0	0.00553705	0	0.0108105	0.0102845	0.0103025	0.0139427	0.00922536	0.00512699	0.0049473	0.0102074	0.0115539
MIR488	0	0	0	0	0	0	0	0	0	0	0	0
PAPPA2	0.0440077	0.00465925	0.0244303	0.0818699	0.0649053	0.0520155	0.113413	0.0543399	0.194139	0.224802	0.146016	0.150695
RFWD2	43.7137	38.0693	46.3937	40.3062	41.3795	37.2422	45.7461	30.0069	45.1173	49.1627	46.48	53.5527
SCARNA3A	0.320175	0	0	0	0	0	0.284527	0	0	0	0	0
MIR1843B	0	0	0	0	0	0	0	0	0	0	0	0
TNR	0	0	0	0.0072377	0.0137711	0	0.0248928	0.0123529	0	0.013249	0.0273357	0.0232064
4930523C07RIK	3.42759	4.39328	3.15185	7.9109	6.24409	7.27686	7.46853	5.35996	9.75065	7.29373	6.40932	7.58779
4930562F07RIK	0	0	0	0	0	0	0	0	0	0	0	0
TNN	0.260152	0.247889	0.267177	0.221822	0.268582	0.24343	2.60663	1.78398	3.01578	9.58544	5.85181	9.76329
MRPS14	38.145	38.6392	36.5384	29.5333	28.0209	30.7525	37.6985	41.1704	35.2889	37.9707	34.6793	38.6823
CACYBP	141.244	140.141	127.447	46.8015	53.0076	46.7667	68.2118	55.3003	63.375	76.3283	75.5683	73.8168
RABGAP1L	14.6639	13.0761	14.9681	18.4394	21.3787	17.9495	22.0926	6.46143	24.6486	26.6284	27.9247	29.7746
MIR1927	0	0	0.384833	0	0	0	0	0	0	0	0.338247	0
GPR52	0.0347888	0.0736642	0.502126	0.215731	0.205235	0.102798	0.0618308	0	0.136417	0.164545	0.135797	0.153712
RC3H1	18.9469	19.8709	17.5277	26.703	32.8123	27.9932	27.2045	9.01216	29.5397	28.2221	29.8675	31.9468
SERPINC1	0	0.0370196	0	0.0180691	0.1719	0.154981	0.0621455	0.0462591	0.034278	0.0496149	0.0511832	0.0579355
ZBTB37	4.81623	3.18308	4.98003	2.99668	3.83625	2.83672	2.67175	1.07269	3.67226	3.60798	4.32971	3.89062
GAS5	32.3813	26.562	30.3515	16.6647	17.7447	13.6087	24.1092	31.1432	22.7677	20.5284	21.3361	22.5168
SNORD47	6.39364	8.61531	5.16268	4.80583	8.001	2.29002	3.09915	1.02529	2.84903	6.04819	3.40329	5.77839
DARS2	16.5007	16.6432	15.8135	11.482	12.1785	13.3742	9.83504	7.38835	9.88766	10.1799	9.46176	9.49798
CENPL	28.0992	22.0744	28.1881	8.14888	5.72671	8.97135	4.10213	2.75976	3.14339	3.01857	2.90235	2.60082
KLHL20	28.3472	21.6198	28.0026	16.5011	18.9188	15.2833	16.3588	6.77666	17.6517	13.8106	13.5439	14.2452
ANKRD45	0	0	0	0.0419526	0.0199557	0.0399815	0	0.0268509	0.0198965	0	0.00990303	0
4930469G21RIK	0	0	0	0	0.0778773	0	0	0	0	0	0	0
PRDX6	107.756	124.483	99.9207	78.4556	75.9068	74.3957	67.1348	75.6271	60.3401	56.8612	54.7035	55.3308
TNFSF4	0	0	0	0.0242681	0.0230873	0	0.0208665	0	0.0230189	0	0	0
TNFSF18	0.109827	0.0968983	0.0812922	0.0378366	0.0539934	0.0360589	0.0650661	0	0	0	0.0535886	0
FASL	0	0.0206823	0.0867566	0	0	0	0.0347199	0.0172296	0.0574519	0	0	0
SUCO	24.7778	19.6194	25.7745	16.7691	17.5667	18.0519	20.0976	7.52756	20.9495	29.0084	28.1135	29.0502
4930558K02RIK	0	0	0	0	0	0	0	0	0	0	0.0316744	0
PIGC	9.20195	9.01537	8.94594	19.8135	18.8832	17.8342	24.8068	26.3265	23.9548	16.6516	16.6642	18.7867
DNM3	0.954183	0.648671	0.841947	0.980986	1.0567	1.0635	0.571247	0.513805	0.822177	0.289791	0.401868	0.360579
2810442N19RIK	0	0	0	0	0	0	0	0	0	0	0	0
DNM3OS	0	0	0	0.00492525	0	0.00469384	0	0.00420308	0	0	0	0.00526398
MIR199A-2	0	0	0	0	0	0	0	0	0	0	0	0
MIR214	0	0	0	0	0	0	0	0	0	0	0	0
METTL13	27.9495	22.1503	29.6334	11.7002	11.9431	11.2439	15.4874	11.6448	14.191	18.6254	18.1173	20.2831
VAMP4	10.7284	9.22582	11.0003	12.8462	13.028	11.7429	12.3317	8.55423	10.8684	11.6449	12.4644	11.8012
MYOC	0	0	0.0201667	0.0563183	0.0535781	0.0357815	0.080707	0.0160202	0.0178064	0	0.0177255	0
7420461P10RIK	0	0	0	0	0	0	0.0453092	0.044969	0	0	0.0995114	0
PRRC2C	128.597	117.027	124.949	99.1439	129.945	110.042	88.3202	22.9464	100.193	77.8948	100.617	95.9767
FMO4	0	0	0	0	0	0.0208242	0	0.0186469	0	0	0.0206318	0
FMO1	0.0162427	0.0343935	0.0360678	0.587557	0.958233	0.591949	0.851622	0.200562	0.493619	1.19848	1.07785	0.681792
FMO2	0	0.0239806	0	0.0234097	0.0111353	0.0780844	0.31199	0.0299658	0.155432	0.857057	0.862044	0.7631
FMO6	0	0	0	0	0	0	0	0	0	0	0	0
FMO3	0	0.0199003	0	0	0	0.0185138	0	0.0165781	0	0.0177807	0.0183428	0.0622878
MROH9	0	0	0	0	0	0	0.011358	0	0	0.0120904	0	0
PRRX1	6.49798	4.93014	7.11879	3.83763	4.11475	3.99708	2.66862	1.1677	2.4864	1.17084	1.09399	0.907723
GORAB	20.494	15.4801	21.8344	10.3027	12.0814	10.6937	10.8256	5.72411	10.7909	10.8827	11.0651	12.0924
METTL11B	0	0	0	0	0	0.0353398	0	0	0	0	0	0
KIFAP3	40.4469	41.5258	41.0053	57.4318	58.6208	54.0281	48.1006	28.3195	46.8647	36.3899	36.2989	37.2369
SCYL3	29.1593	21.1472	29.0201	15.0893	17.0566	14.2613	18.817	8.72668	20.6158	20.8155	20.7344	21.7342
BC055324	21.0715	24.4396	19.2148	7.58137	7.48056	10.0513	3.55355	1.90084	2.87644	2.35806	1.95114	1.66358
METTL18	10.1318	9.21802	9.92568	6.77571	6.44603	5.46196	5.59569	5.46225	6.47772	7.35376	6.87816	7.7283
SELE	0	0	0	0.0268183	0.0382701	0.102233	0.0115296	0	0.0254377	0	0	0
SELL	0	0	0	0	0	0	0	0	0	0	0	0
SELP	0.0109891	0.0116346	0	0.0454303	0.0432199	0.0324719	0.0292968	0.0290768	0.0323188	0.0311861	0.0428958	0.0242774
GM16548	0	0	0	0	0	0	0	0	0	0.0287988	0	0
F5	0.0406626	0.0269068	0.0282166	0.525325	0.744649	0.615791	1.2015	0.340707	1.44004	1.21166	1.53765	1.38118
SLC19A2	18.7369	12.4558	19.2173	7.65421	8.44687	8.64929	4.60692	2.5941	4.79173	4.43363	4.24339	5.18885
CCDC181	16.798	11.2024	17.8761	25.6815	26.3912	24.2197	17.6193	16.6083	18.2452	19.4719	18.6484	21.1966
BLZF1	27.041	19.2514	27.2472	19.0253	19.4345	18.3067	21.093	11.735	21.1026	20.0175	21.2351	20.975
NME7	18.859	18.5878	19.3536	20.7338	22.3476	21.7578	15.5685	14.7668	15.7136	12.1184	12.3548	12.6706
ATP1B1	4.62412	3.4131	4.77772	6.40739	10.0542	6.36497	242.434	129.904	215.36	1105.59	1097.77	1114.7
DPT	0	0	0	0	0	0	0	0.0814719	0	0.0436911	0	0
GM20743	0	0	0	0	0	0	0	0	0	0	0	0
XCL1	0	0	0	0	0	0	0	0	0	0	0	0
4930568G15RIK	0	0	0	0	0	0	0	0	0	0	0	0
TBX19	0	0	0.0315152	0	0	0	0	0.0125177	0	0	0	0
SFT2D2	77.9884	62.0624	80.7586	90.3969	92.3444	90.6548	159.207	72.1494	168.042	235.177	212.32	235.202
TIPRL	37.0328	29.1874	39.5321	24.7522	22.9224	23.657	28.5094	22.389	27.4388	28.3556	27.8342	28.4296
GPR161	7.13613	8.83162	8.11734	7.05385	7.8004	6.4543	8.38057	1.42343	7.58665	3.95468	4.07968	3.73727
DCAF6	29.5843	27.1707	32.2882	60.9281	67.641	58.4933	69.3222	43.6664	75.8117	77.4261	79.5053	80.17
MPC2	56.4497	56.7208	54.1281	59.2112	60.7235	55.0784	76.3084	100.707	74.7686	110.733	106.031	104.528
ADCY10	0.0145059	0.00767895	0	0.0149923	0	0.0142879	0.00644541	0	0.0142205	0.0411664	0.0495455	0.0640934
MPZL1	78.3515	101.289	79.5137	186.602	178.453	179.888	239.992	185.492	237.048	419.163	387.108	414.105
RCSD1	0	0	0	0.146245	0.222607	0.306622	0.226342	0.0499206	0.110973	0.026771	0.0276172	0.0625211
CREG1	7.30722	7.11523	7.32342	13.9101	13.7227	12.6961	14.7726	12.4193	15.0067	24.185	27.1356	25.0397
CD247	0	0	0	0	0.0242056	0.0161654	0.0291695	0	0	0.046576	0.0480482	0.00906447
POU2F1	12.6847	13.1981	12.0953	7.80472	9.69237	8.23768	6.22207	1.72158	6.81026	6.34009	6.96754	7.51147
DUSP27	0	0	0	0.0194024	0	0	0.0083414	0	0	0	0.00915999	0
GPA33	0.346007	0.732658	0.603683	1.34529	1.40943	1.36322	1.90346	1.87463	2.35824	3.02373	3.79463	2.82102
MAEL	0	0.025873	0	0	0	0	0	0.0215537	0	0	0	0
ILDR2	0	0	0	0.00472729	0	0.00901036	0.00406466	0	0.00896788	0.0173072	0.00446356	0.0404192
TADA1	24.6526	22.6864	25.2776	24.1132	24.2741	24.1952	24.1314	19.3187	22.6646	22.8871	21.2375	20.5939
POGK	4.39322	2.65941	4.39958	4.21733	4.4204	4.34738	5.71261	2.55454	6.33705	8.75297	8.71448	8.73162
GM4846	0	0	0	0	0	0	0.0192512	0	0	0	0	0
GM4847	0	0	0	0	0	0	0	0	0.0122966	0	0	0
FMO9	0	0	0	0	0	0	0	0	0	0	0	0
GM16701	0	0	0	0	0	0	0	0	0.0395698	0	0	0
FAM78B	0	0	0	0.0078314	0	0	0	0	0	0	0	0.00837
UCK2	167.06	173.372	158.438	62.2363	68.3769	71.2804	61.3726	32.8734	60.6393	54.1034	62.68	58.3074
MIR6347	0	0	0	0	0	0	0	0	0	0	0	0
TMCO1	26.7268	23.6833	25.6331	21.7929	22.9494	21.6756	25.8898	23.6695	24.6778	30.0996	29.7984	30.3249
ALDH9A1	43.9418	46.7345	43.309	51.5762	51.7809	53.9736	39.2152	33.8278	37.6518	41.29	41.6712	38.4626
MGST3	131.072	158.046	128.351	220.08	197.379	225.269	151.11	231.207	142.783	99.8449	98.7043	97.3985
LRRC52	0	0	0	0	0	0	0	0	0	0.031433	0.0324265	0
RXRG	0	0	0	0	0	0	0	0	0	0	0	0
LMX1A	0.181093	0.299578	0.150797	0.0350935	0.033386	0.0445929	0.0402326	0.0399305	0	0	0.0220905	0.0250047
PBX1	81.8472	84.6975	80.7747	105.882	118.688	102.263	84.08	41.8751	87.4209	73.6275	78.5333	79.4003
MIR6348	0	0	0	0	0	0	0	0	0	0	0	0
NUF2	55.3121	58.145	56.1965	13.1998	13.8087	17.2834	4.94189	2.17528	3.01843	4.13119	2.65211	2.22112
RGS5	0	0.0442229	0	0.0431701	0	0	0	0	0.0204739	0	0	0
RGS4	0.0256924	0.0136007	0	0	0.0252618	0.0126531	0.0228318	0	0.0251869	0.0121521	0	0
1700084C01RIK	0	0	0	0	0.0515937	0	0.0233154	0	0	0	0	0
HSD17B7	7.70646	9.12978	6.75881	3.15862	4.25564	3.36005	5.82079	1.69743	4.85032	11.7204	9.0117	9.3429
3110045C21RIK	0.299582	0.422904	0.221745	0.791269	0.916414	0.491799	0.739518	0.469737	0.48948	1.38549	0.942026	1.17661
DDR2	0.36459	0.0675506	0.495873	0.0423916	0.067215	0.0403999	0.259197	0.112547	0.201047	1.4701	1.05403	1.06723
UAP1	39.5325	42.0748	39.4577	33.1346	33.6303	32.5672	32.8883	25.0023	31.573	32.9001	32.2663	32.071
UHMK1	43.1939	38.9917	43.8949	40.5715	44.6174	43.3352	34.2542	2.00854	35.5185	37.0283	29.109	36.1863
SH2D1B2	0	0	0	0	0	0	0	0	0	0	0	0
SH2D1B1	0.105459	0	0.029272	0.0544974	0	0	0	0	0	0	0	0
GM7694	0.0689967	0.052178	0.0984923	0.254679	0.184138	0.194171	0.122629	0.104321	0.17393	3.26344	4.37657	4.15913
1700015E13RIK	0	0	0.117663	0	0	0	0	0	0	0	0	0
NOS1AP	0.030766	0.0217153	0.0341586	0.0741943	0.110918	0.17172	0.091135	0.0180901	0.0301607	1.17385	1.12088	1.07617
OLFML2B	0.048828	0.0258479	0.0271062	0.088314	0.108022	0.108212	0.0976308	0.0861312	0.107701	0.635108	0.631359	0.660714
ATF6	46.007	27.8545	47.4494	19.5158	20.7415	17.7213	21.594	8.00121	23.6576	38.9047	41.1472	42.9743
DUSP12	10.9162	8.8791	11.5705	5.34273	6.62382	6.71672	9.0655	9.23994	8.49109	9.25996	8.53299	8.47414
FCRLB	0.0588483	0.0934571	0.196013	0.364929	0.54969	0.579638	0.496813	0.15571	0.115381	0.139172	0.0574283	0.260018
FCRLA	0	0	0	0	0	0	0	0	0.0214461	0.0206944	0	0
FCGR2B	0.0488753	0.051746	0	0.0505141	0.0961125	0.0481407	0.0217168	0.0215537	0	0	0.0476959	0.0809822
FCGR4	0	0	0	0.0312379	0	0.0297702	0	0.159946	0.148149	0.142957	0.235961	0.0667725
FCGR3	0.0279236	0	0	0	0	0.0275039	0.0248146	0	0	0	0	0
MIR6546	0	0	0	0	0	0	0	0	0	0	0	0
CFAP126	2.26538	2.16632	1.501	6.11768	7.0415	6.94591	6.2018	8.31439	6.37587	6.42892	7.06001	5.69084
SDHC	140.836	155.452	136.158	227.561	212.676	219.742	233.994	247.894	228.381	237.625	223.434	216.275
MPZ	0.0189567	0.0200701	0.0210471	0.274292	0.18639	0.149374	0.25269	0.167195	0.260172	0.215189	0.110995	0.0628191
PCP4L1	0.0239877	0	0	0	0	0	0.0213169	0.0846273	0.0235158	0	0	0
NR1I3	0	0	0	0.0276148	0	0	0	0	0	0	0	0
TOMM40L	24.5574	22.6299	23.3006	15.2579	16.0167	15.2292	16.5571	20.9404	16.6922	16.9394	16.4521	17.2077
APOA2	0	0	0	0	0.119062	0.0397572	0	0	0.0791396	0	0.0393899	0
FCER1G	0.172252	0.425528	0.127498	0.296713	0.564551	0.848316	0.459221	1.11411	0.281439	0.054315	0.336191	0.570814
NDUFS2	248.35	238.329	254.449	324.876	321.467	330.095	318.076	314.297	292.055	227.677	226.746	221.631
ADAMTS4	3.4664	4.47586	4.59096	13.395	13.4309	15.9773	9.89034	5.74267	8.32912	4.12563	3.7943	3.54496
B4GALT3	47.916	32.4321	51.8981	46.2002	47.4848	43.4522	45.0176	51.1171	48.5675	58.1345	59.2893	61.534
PPOX	11.079	10.7852	13.0839	35.4664	29.2733	34.9853	34.1641	34.6578	33.9051	16.957	15.5696	16.7298
USP21	23.6107	24.594	26.4067	31.8681	34.3201	31.9235	40.0858	37.0805	42.6583	27.3985	27.5545	26.7886
UFC1	85.3591	90.0407	84.8074	111.593	116.76	106.466	129.63	176.98	126.98	111.704	107.356	109.83
DEDD	50.0977	44.3026	49.713	39.1903	38.262	38.7514	34.1638	30.4812	34.5709	29.41	30.4746	30.6163
NIT1	28.0468	28.6751	29.0941	64.7948	59.5063	64.0526	53.8554	52.4082	53.3995	48.4847	42.5308	44.3753
PFDN2	109.272	127.523	109.183	98.4346	102.424	88.0064	107.308	119.681	95.6302	89.8653	107.762	99.5684
KLHDC9	0.0485924	0.0771697	0.0269754	0.175776	0.26278	0.287173	0.151138	0.342863	0.119091	0.183868	0.0948398	0.161027
PVRL4	56.617	46.6891	65.3743	97.3956	91.8404	93.4036	81.0033	66.3302	97.0328	73.1207	79.7249	83.1441
ARHGAP30	0.0421001	0.115889	0.0373941	0.11313	0.23181	0.132695	0.0523777	0.022279	0.0990524	0.0398254	0.0328674	0.055805
USF1	53.3395	50.8961	55.6053	73.0744	68.8418	74.5172	68.7691	75.311	67.7254	56.8836	56.4113	54.4994
TSTD1	2.53699	3.12157	5.17674	8.4331	7.07892	7.56412	6.82451	6.6523	6.11687	3.82689	3.27873	2.80239
F11R	193.165	170.49	193.611	273.851	255.273	272.814	255.025	250.385	271.871	284.618	304.533	299.057
ALYREF2	3.17559	2.19951	3.09741	3.65015	3.82272	3.85867	6.8045	7.32927	5.70253	5.97994	6.63236	5.86817
ITLN1	0	0	0	0	0	0.0326714	0.0589537	0.058511	0.0975523	0.690311	0.420805	0.549598
CD244	0	0	0	0	0.0197698	0	0	0	0	0	0	0
LY9	0	0	0	0	0	0	0	0.0128607	0.0142946	0.0137936	0	0
SLAMF7	0	0	0	0	0	0	0	0.00837868	0	0	0	0
MIR7683	0	0	0	0	0	0	0	0	0	0	0	0
CD48	0	0	0	0.0683842	0	0.0325856	0	0	0.032432	0	0	0
SLAMF1	0	0	0	0	0	0	0	0	0	0	0.0137161	0
CD84	0.006042	0	0	0.00624458	0.0118815	0.0178536	0.00536928	0	0.0236925	0.0171466	0.0235848	0.0333703
SLAMF6	0	0	0	0	0	0.0152324	0.013743	0	0	0	0	0
VANGL2	6.85401	8.35391	7.68406	13.2346	13.7577	12.9421	8.64608	3.3322	8.96435	3.93765	4.15999	3.82243
NHLH1	0	0	0	0.0314012	0.0149367	0	0.0134999	0.0267969	0	0	0	0
NCSTN	70.4268	67.9924	75.3132	92.5785	94.9961	92.8429	130.134	81.175	134.658	148.453	143.757	145.298
COPA	232.577	221.705	234.726	282.889	292.782	276.503	252.513	145.9	269.359	213.069	221.309	226.028
PEX19	30.7096	37.6745	33.8013	59.6374	59.5356	58.9153	51.1815	46.5401	53.5155	47.953	46.5484	49.1171
DCAF8	52.7193	55.1211	55.0923	123.308	129.684	117.822	112.706	86.8526	116.594	97.9464	102.136	103.568
PEA15A	36.7587	46.6043	35.5964	78.615	81.6585	80.0142	57.2536	48.6848	53.0515	36.0279	44.1773	38.5485
CASQ1	0.0201604	0	0.0447671	0	0.0396451	0.0198574	0.0537473	0	0	0.0190711	0.0393479	0
ATP1A4	0	0	0	0.0112044	0	0	0.0192678	0.0191231	0.0212553	0	0.0105793	0.011975
ATP1A2	0	0	0	0.0877892	0.0835177	0.119521	0.372027	0.251507	0.231967	0.223837	0.224991	0.187654
IGSF8	54.1319	64.9636	56.9439	99.8927	98.6272	109.321	42.9153	42.9364	42.4303	43.7614	49.4229	50.128
KCNJ9	0	0	0	0	0	0	0	0	0	0	0	0
KCNJ10	0.00698736	0	0	0	0.0206108	0.00688233	0.00620938	0	0	0	0.00681875	0
PIGM	15.7582	13.8035	15.6116	10.4364	12.034	10.1869	11.3954	5.37537	11.8956	11.1907	10.1513	11.1321
SLAMF9	0.0659924	0	0	0.0341025	0.0973296	0.130001	0.0293224	0	0.064694	0	0.0643999	0
IGSF9	9.5852	9.32917	10.2374	12.6543	12.7905	14.258	4.92273	3.62315	4.6896	1.71589	2.12589	2.10187
TAGLN2	811.791	903.089	812.712	580.512	570.84	647.158	274.934	272.532	233.989	183.481	215.238	179.343
CFAP45	0	0.0219537	0.0230224	0	0.0815532	0.0612724	0.0184271	0.0182887	0.0203278	0.0196154	0	0.0458099
4933439K11RIK	0.0401494	0	0.0891537	0.456452	0.710579	0.355914	1.14173	0.601991	1.33822	0.949503	1.17542	1.19744
VSIG8	0.0201068	0.0638632	0.044648	0.498743	0.336087	0.455505	0.482438	0.496549	0.413935	0.228244	0.274702	0.466413
SLAMF8	0.0370398	0	0	0	0	0	0	0	0	0.0175193	0.0722921	0
FCRL6	0	0	0	0	0	0	0	0	0	0	0	0
DUSP23	0.133312	0.0282284	0.148013	0.275564	0.340803	0.577757	0.30802	0.258675	0.104551	0.302662	0.026019	0.235612
CRP	0	0	0	0	0	0	0	0	0	0	0	0
APCS	0	0	0	0	0	0	0.0341201	0	0	0	0	0
OLFR16	0	0	0	0	0	0	0	0	0	0	0	0
OLFR1408	0	0	0	0	0	0	0	0	0	0	0	0
OLFR1406	0	0	0	0	0	0	0	0	0	0	0	0
OLFR218	0	0	0	0	0	0	0	0	0	0	0	0
OLFR1404	0	0	0	0	0	0	0	0	0	0	0	0
FCER1A	0	0	0	0	0	0	0	0	0	0	0	0
OLFR418	0	0	0	0	0	0	0	0	0	0	0	0
MPTX2	0	0	0	0	0	0	0	0	0	0	0	0
ACKR1	0	0	0	0	0	0	0	0	0	0	0	0
CADM3	0	0	0.0100858	0	0	0	0.0161453	0	0	0	0	0
AIM2	0	0	0	0.0307823	0.102496	0.014668	0.0264676	0	0.0145989	0	0.087195	0
BC094916	0	0	0	0	0	0	0	0	0	0	0	0
PYDC4	0	0	0	0	0	0	0	0.0124336	0	0	0	0
PYHIN1	0.0108037	0	0	0.0223319	0	0	0.0288025	0	0.0635471	0	0	0
PYDC3	0	0	0	0.0130724	0	0	0	0	0	0	0.0123431	0.0139715
AI607873	0.0216943	0.0344527	0.0120433	0.0896868	0.213307	0.0747888	0.443414	0.172207	0.212675	1.5289	2.9745	1.32999
IFI204	12.5935	9.48139	13.7081	13.305	13.2404	14.1879	12.4349	6.12718	9.23109	5.80861	8.91602	5.83714
MNDAL	1.58409	1.9916	1.84671	8.86138	7.96296	9.92731	6.31715	2.46247	5.78466	5.95655	7.55543	3.98081
MNDA	5.21622	3.7339	4.52528	4.58354	4.77581	5.03381	4.0912	0.875424	3.56088	2.75686	2.47304	2.00616
IFI203	3.70005	4.00732	3.82504	21.6832	20.4839	22.2851	17.7858	9.58578	16.1068	13.5402	18.4533	11.0838
IFI202B	32.2061	36.1021	34.0292	45.9829	42.8147	48.6087	28.7324	14.75	19.591	15.9394	21.678	13.2448
IFI205	0.163958	0.0743949	0.0520109	0.145248	0.13818	0.0922821	0.208147	0.0206584	0.0688853	0.0664711	0.0685722	0.0776184
OLFR433	0	0	0	0	0	0	0	0	0	0	0	0
OLFR432	0	0	0	0	0	0	0	0	0	0	0	0
OLFR430	0	0	0	0	0	0	0	0	0	0	0	0
OLFR429	0	0	0	0	0	0	0	0	0	0	0	0
OLFR426	0	0	0	0	0	0	0	0	0	0	0	0
OLFR427	0	0	0	0	0	0	0	0	0	0	0	0
OLFR231	0	0	0	0	0	0	0	0	0	0	0	0
OLFR424	0	0	0	0	0	0	0	0	0	0	0	0
OLFR421-PS1	0	0	0	0	0	0	0	0	0	0	0	0
OLFR420	0	0	0	0	0	0	0	0	0	0	0	0
SPTA1	0	0	0	0	0.00883938	0	0.00399454	0	0.00440658	0.00850429	0.00438655	0
OLFR419	0	0	0	0	0	0	0	0	0	0	0	0
MPTX1	0	0	0	0	0	0	0	0	0	0	0	0
OLFR417	0	0	0	0	0	0	0	0	0	0	0	0
OLFR248	0	0	0	0	0	0	0	0	0	0	0	0
OLFR414	0	0	0	0.0408873	0	0	0	0	0	0	0	0
OLFR220	0	0	0	0	0	0	0	0	0	0	0	0
FMN2	0	0	0	0	0	0	0.0104235	0	0	0	0.00572322	0
GREM2	0	0	0.0112007	0	0.0198384	0	0	0	0	0	0	0
RGS7	0.394972	0.257336	0.607191	0.910635	1.26962	0.957627	0.836991	0.468946	0.774404	3.20461	2.50537	3.00369
FH1	125.287	144.778	118.567	126.282	131.018	132.479	114.65	99.1901	104.962	125.044	119.982	116.888
KMO	0	0.0160127	0	0	0	0	0	0	0	0	0	0
OPN3	4.46362	4.90668	4.41046	3.77451	3.33886	3.3868	1.25262	1.26205	2.21931	1.9395	2.02164	1.67498
CHML	14.5415	12.9234	12.0093	7.64859	8.72201	8.09238	6.1483	1.52553	6.2496	6.40455	6.73962	6.97367
WDR64	0	0	0	0	0	0	0	0	0	0	0	0.0109363
EXO1	18.0669	20.0216	16.4557	1.82259	2.25341	2.54799	1.47565	0.520467	0.578498	0.837335	0.535691	0.371397
BECN2	0	0	0.0234471	0.0436527	0	0.0416018	0	0	0	0	0	0
PLD5	0	0	0	0	0.00953967	0	0.00862202	0	0	0	0	0
CEP170	35.6217	30.6202	36.82	30.3307	32.5751	33.3573	22.7897	6.0874	23.0989	13.5428	14.3007	14.4951
MIR350	0.381623	0	0	0	0	0	0	0	0	0	0	0
SDCCAG8	8.76685	8.06922	9.27946	18.6289	17.575	17.1627	13.34	9.03097	12.7111	9.98275	9.71286	10.4671
HMGA2-PS1	9.73289	10.9138	10.2784	9.95579	11.2672	10.0302	5.73651	6.37752	5.54334	2.48518	2.75907	1.82408
AKT3	68.1089	65.1736	69.6839	93.5653	94.8104	85.4361	73.1044	25.6583	77.5164	42.9173	44.2661	46.2983
ZBTB18	57.8252	34.1791	58.5168	24.0892	25.2524	24.3348	25.0918	10.2916	25.0833	27.5359	28.0525	26.8656
2310043L19RIK	0.378889	0.515755	0.300478	0	0	0.0533134	0	0	0	0.0512024	0	0
1700016C15RIK	1.61413	1.2817	2.24015	2.18957	2.67819	2.13638	2.24126	1.73506	1.38457	10.1635	8.41735	9.75066
ADSS	185.07	164.793	192.055	100.012	104.706	95.7795	105.746	63.3418	104.134	129.798	127.215	131.917
GM16432	0.0227184	0	0.0504471	0	0.0446753	0.0223769	0	0.0801491	0.111357	0.171927	0.133021	0.200759
DESI2	109.423	82.7146	111.244	38.8064	40.3746	36.8065	32.4744	15.7237	34.1275	34.4499	33.0972	35.3734
COX20	46.0451	41.2496	47.3774	53.2544	59.8671	50.5861	57.2559	72.8919	62.0872	78.7381	87.3169	71.4489
HNRNPU	629.825	605.019	587.175	310.804	345.057	291.365	303.53	188.8	294.109	375.545	403.911	395.859
EFCAB2	2.1287	1.54451	2.39649	1.16927	1.31729	1.17298	0.952458	0.630203	0.875587	1.38	1.32194	1.26613
KIF26B	10.0293	8.53894	10.5009	14.1511	18.0571	14.6319	10.3179	3.00105	9.46688	17.9131	15.7363	15.0173
SMYD3	5.83636	4.15843	5.85538	7.3402	7.70408	6.84691	6.33811	5.32479	6.59798	5.74907	5.10735	5.69235
TFB2M	29.1997	28.4801	26.9022	20.7838	23.6876	19.6553	27.1693	16.906	26.371	33.4472	34.2785	34.1466
CNST	15.9435	10.9746	16.4372	10.3783	10.6988	9.21927	12.8461	6.87702	14.3504	16.5997	15.575	15.3434
SCCPDH	42.518	41.9559	43.2999	54.8329	47.8163	56.3613	50.9551	48.6827	47.6167	49.7412	46.0958	46.3143
AHCTF1	85.2	67.8649	82.8296	29.2579	33.0041	29.8511	32.0002	10.7992	32.0968	34.4928	34.8984	37.1631
CDC42BPA	40.3427	31.8943	41.845	28.0721	29.7274	28.49	28.0004	10.1552	30.6662	24.0877	24.8576	26.4639
ADCK3	0.621026	0.677128	0.61747	7.87462	7.96538	7.02989	7.66867	7.29225	6.81502	6.48849	5.80713	5.75414
PSEN2	7.26969	5.87327	7.91031	7.47596	7.80739	7.35684	10.6007	10.9048	10.1124	17.5781	19.2306	18.4233
GM5069	0.548616	0.714878	0.573972	0.992268	0.943988	0.820946	0.984441	1.01427	0.951532	1.33735	0.988389	1.13043
ITPKB	19.4569	16.2163	21.1831	38.1518	39.0409	36.3446	35.2788	14.0709	38.17	29.4826	27.3066	29.9927
6330403A02RIK	0	0	0	0	0	0.00567527	0.0102407	0	0.011297	0	0	0
PARP1	83.7551	111.198	73.1082	54.6582	60.0358	56.7381	56.9102	38.5811	55.3092	50.2703	48.0539	46.1384
MIR6904	1.12778	1.19402	0	0.582797	0	0.555415	0	0.497343	0.552796	1.60027	0.550283	0.622878
LIN9	32.7233	30.2529	29.2433	12.0973	13.2485	14.7791	10.4016	3.38492	9.79849	13.1647	12.1458	12.3878
MIXL1	0.0165053	0	0	0.0170587	0.0162287	0	0.0293352	0	0	0	0	0
ACBD3	42.3195	41.0137	42.4906	39.7899	39.7695	38.1884	47.59	25.4307	51.2611	44.9238	47.1404	47.2876
H3F3A	519.8	542.337	505.701	950.383	963.004	893.107	1092.59	1095.72	1042.76	1027.7	963.39	953.417
SDE2	53.2956	40.1501	59.2515	39.0841	40.4081	37.4111	38.5313	20.2961	39.5684	32.7928	30.5816	32.6537
LEFTY2	0	0	0	0	0	0	0	0	0	0	0	0.0339154
PYCR2	83.3111	76.1469	81.8212	52.2341	47.625	55.5515	58.0776	70.6451	57.6754	49.8204	43.5556	46.6395
LEFTY1	0.023554	0	0	0	0.0231593	0.0696	0	0	0	0	0	0
TMEM63A	109.504	108.44	119.313	138.48	139.954	138.523	106.994	102.857	118.831	101.557	98.3817	114.504
EPHX1	56.3873	49.9935	55.9794	121.106	118.76	120.511	228.425	242.6	243.646	299.158	300.222	302.983
9130409I23RIK	0	0.0210746	0	0.0205729	0	0	0	0.0351127	0	0.01883	0.0194252	0.0659634
NVL	54.5473	45.712	49.2258	26.5675	31.4175	26.6084	32.2136	11.6083	29.8235	27.4001	27.7963	29.663
CNIH4	53.2027	51.9579	52.9341	31.4243	34.4421	33.9675	45.5018	40.6125	43.4747	54.4291	58.6203	56.891
WDR26	65.5036	68.4484	64.5184	100.342	105.744	97.6657	95.6484	35.0432	106.881	115.195	117.712	132.423
CNIH3	0.0138543	0.044004	0.0307641	0.200463	0.0953547	0.163753	0.0615587	0.0733157	0.0543269	0.0131057	0.01352	0.0153036
CCDC121	0	0	0	0.0214664	0	0.0409156	0.0184575	0.0183189	0.0203614	0.0392955	0.0405376	0
LBR	98.9082	99.9315	90.3297	28.7689	30.9562	33.7765	23.7722	11.1824	23.263	23.8363	21.8909	23.9799
ENAH	16.5816	13.6809	20.0103	29.3733	29.5928	26.0794	33.7835	18.9077	35.4805	64.2769	60.8292	65.0616
SRP9	94.0161	92.6793	91.4488	78.2073	77.2389	77.6428	84.7819	113.29	81.5996	107.784	104.126	108.211
VMN1R1	0	0	0	0	0	0	0	0	0.0402143	0	0	0
DEGS1	121.068	120.238	115.484	126.101	129.34	129.493	216.248	168.671	224.552	312.937	310.453	319.376
1700047M11RIK	0	0	0	0	0	0	0	0.0485743	0	0.104196	0.0537448	0
FBXO28	29.4986	25.7519	30.2669	35.4153	34.9321	35.3268	36.9432	22.816	39.7588	42.4609	40.0958	42.0726
TRP53BP2	25.4609	23.4506	26.4639	28.9773	32.3447	28.1608	44.6528	20.5575	45.9619	100.667	112.86	105.516
CAPN2	170.22	184.438	175.584	217.501	226.069	220.613	189.48	131.792	195.618	181.524	185.086	188.656
CAPN8	0	0	0	0.0105391	0.0100263	0	0.0181237	0	0.0199932	0.0385849	0.00995114	0.0450557
CCDC185	0	0	0	0	0	0	0	0	0	0	0	0
SUSD4	0.742617	0.766578	0.803894	2.93575	3.35879	3.36469	2.77172	1.39183	2.12942	1.36986	0.960224	1.3535
TLR5	10.1567	7.16467	10.6998	8.22693	10.2652	7.68917	9.27775	2.96867	8.7065	4.80397	5.4053	5.23128
DISP1	5.77446	5.26877	5.39638	5.33078	6.36957	5.2518	4.68671	2.58489	5.09903	4.41937	4.45288	4.58356
BROX	80.2073	67.0827	82.5828	83.3711	83.9795	80.8753	89.5213	46.9748	88.4138	90.2065	81.5577	88.4408
AIDA	40.5112	49.7171	37.2591	23.9051	26.2164	23.912	26.3149	15.5934	23.6868	24.159	27.0947	25.9167
MIA3	25.2039	24.6905	24.2558	31.2217	36.3705	29.1917	37.6383	20.2522	39.6472	60.5728	65.9058	68.2856
TAF1A	25.1769	11.0233	26.5167	5.7108	6.72007	6.02721	7.88627	6.17571	7.83425	9.74839	9.77429	9.53365
HHIPL2	0.0648038	0.041166	0.02878	0.080372	0.0509742	0.0255319	0.080624	0.0685873	0.139764	1.79003	1.59365	1.41734
1700056E22RIK	0.664189	0.744564	0.867566	3.14963	2.57382	3.348	1.59711	2.20539	1.57035	0.923973	1.06756	0.561041
DUSP10	5.9485	5.29494	7.11487	14.326	15.6288	15.6563	9.99053	4.91475	7.45663	4.26974	4.89411	5.00117
1700112H15RIK	0	0	0	0	0	0	0	0	0	0	0	0
4930488B22RIK	0	0	0	0	0	0	0	0	0	0	0	0
HLX	0.22876	0.298088	0.429823	0.509235	0.519061	0.467976	0.281479	0.341446	0.396767	0.0665846	0.22324	0.116626
2018-03-01	0.670245	0.298783	0.293745	0.401047	0.225452	0.364831	0.376181	0.497808	0.363111	0.36707	0.481947	0.350696
2018-03-02	48.9563	50.3447	51.2807	63.1228	61.7481	64.7024	73.05	88.198	69.2557	88.6934	93.8465	96.2094
MIR1981	0	0	0	0	0	0	0	0	0	0	0	0
C130074G19RIK	0	0	0	0	0	0	0	0	0	0.0125269	0	0
MARK1	4.26222	3.49613	4.17171	2.08709	2.26221	2.44553	2.02254	1.3431	1.96343	1.44053	1.58298	1.77353
RAB3GAP2	17.5657	13.7778	18.4343	21.4347	22.0078	22.6962	15.6003	7.86319	15.2273	13.2309	13.1321	14.2195
SNORA36B	0	0	0	0	0	0	0	0	0	0	0	0
MIR664	0	0	0	0	0	0	0	0	0	0	0	0
IARS2	106.042	101.14	103.789	85.6726	94.3378	84.4541	87.2453	55.9038	87.5923	86.693	84.809	88.1813
MIR194-1	0	0	0	0	0	0	0	0	0	0	0	0
MIR215	0	0	0	0	0	0	0	0	0	0	0	0
BPNT1	40.8626	38.8631	39.2554	25.626	25.9964	23.5692	34.5281	25.442	34.8477	54.952	54.1883	56.3068
EPRS	423.766	285.391	436.273	102.022	110.845	103.482	118.112	60.7491	115.893	131.366	133.238	135.369
9630028B13RIK	0	0	0	0	0	0	0	0	0	0	0	0
GM2061	0	0	0	0.0141425	0	0	0	0	0	0.0129443	0	0
SLC30A10	0	0	0.00718883	0	0	0	0	0.0342643	0	0	0.0189558	0.0214565
5033404E19RIK	0	0	0	0	0	0	0	0	0	0	0	0
MIR297C	0	0	0	0	0	0	0	0	0	0	0	0
LYPLAL1	0.670804	0.735567	0.851171	2.22845	2.49691	2.38332	1.83093	2.00735	1.8319	2.78753	2.38468	2.83159
A730004F24RIK	0	0	0	0	0	0	0	0	0	0	0	0
TGFB2	2.59067	2.14178	3.20482	6.18973	7.9248	7.01727	3.97916	1.49508	2.6808	6.14943	5.94585	4.97261
RRP15	92.5812	66.6661	91.2654	19.427	22.1904	19.5275	28.6987	25.2939	26.9529	31.2866	29.629	30.06
D1PAS1	0	0	0	0	0	0	0	0	0	0	0	0
SPATA17	0.0918678	0.0486318	0.0509991	0.189896	0.338731	0.316704	0.102049	0.162052	0.292696	0.152082	0.179302	0.177587
1700007P06RIK	0	0	0	0.0474452	0.13541	0	0	0	0	0	0	0
GPATCH2	13.3798	9.7515	13.2507	10.4721	12.2083	9.91468	11.8753	6.21903	12.4978	12.6176	13.0488	13.651
ESRRG	0.0812487	0.035842	0.0902082	0.0139955	0.0133145	0.0400137	0.0300843	0	0.00663752	0	0.039644	0.022437
9330162B11RIK	0	0	0	0	0	0	0	0	0	0	0	0
USH2A	0	0	0	0.00491502	0.00935175	0	0	0.00209717	0.00932402	0	0.00232041	0.00525305
KCTD3	68.2765	51.9358	70.708	36.2319	38.7425	34.9617	38.851	24.6923	39.4378	41.231	41.8671	40.7862
KCNK2	0.760561	1.13509	0.722344	0.823944	0.567619	1.06503	0.293153	0.218213	0.26051	0.182034	0.232499	0.172073
CENPF	52.4248	48.48	51.9979	24.158	26.9972	36.8682	4.23224	0.814924	3.13695	2.94346	2.55915	1.8949
PTPN14	41.6804	34.7875	41.1855	47.2465	51.1573	42.6818	51.7799	16.9215	58.1139	35.2569	34.9198	36.8309
SMYD2	89.2612	76.1613	80.2347	45.1295	50.7567	51.866	62.4207	70.4849	56.7444	57.2942	59.1052	55.7478
PROX1	0.00913237	0	0	0.0377543	0.026938	0.0179902	0.00811557	0	0.00895271	0.0172779	0.062384	0.0302631
RPS6KC1	20.6068	15.2589	20.4432	16.1761	15.7331	15.4906	16.5476	11.1018	15.399	13.6158	11.8128	12.8071
ANGEL2	44.3463	38.4947	43.2369	42.2421	43.7473	40.0351	40.0504	22.4468	40.9302	39.3249	35.691	38.5552
VASH2	1.84846	2.87348	1.63182	3.32695	4.48607	3.73904	3.29331	1.83708	2.66068	1.30504	0.932723	1.09561
MFSD7B	37.4386	31.3479	36.9074	13.5954	15.0153	13.075	13.0123	4.78591	13.8743	18.5911	17.9068	19.3909
A230020J21RIK	0	0.0242569	0.0763131	0.0947177	0.0450546	0	0	0	0.0673815	0	0.0223584	0
SPATA45	0	0	0.0980065	0	0	0	0.0784442	0	0	0	0	0
TATDN3	10.1532	8.22959	9.86787	9.96424	9.68678	9.25868	9.31722	9.43326	8.74247	7.95156	8.26171	8.45306
NSL1	41.7201	28.2406	42.0738	5.2536	4.33575	6.38362	2.04404	0.863032	1.30808	1.8633	0.806082	0.533417
BATF3	1.64494	1.74156	1.41394	0.493576	0.313041	0.209061	0.377237	0.280803	0.468169	0.150587	0.362476	0
FAM71A	0	0	0	0	0.0166282	0.0166575	0.0450861	0	0.0497368	0	0	0.0747231
ATF3	222.038	53.2384	265.755	21.1638	20.2845	23.2957	12.9471	7.8246	9.85913	20.8539	25.1888	23.3374
NENF	69.7047	66.2	71.59	133.995	127.024	126.625	129.194	226.417	136.779	123.73	130.89	126.911
TMEM206	13.624	10.5518	13.1608	8.47079	8.20002	8.14361	9.84703	7.58543	10.1315	13.1174	13.0585	13.4311
PPP2R5A	83.6886	75.1972	81.7159	63.9429	65.6529	63.0396	54.9365	43.7338	56.5174	52.0434	53.0425	57.2235
DTL	65.6564	61.5936	66.456	12.7801	11.5382	15.6008	7.97317	2.67171	6.32239	4.08401	2.99078	2.40408
INTS7	64.4086	73.5757	64.4768	42.1207	45.8909	42.5766	41.125	23.5166	41.1157	32.8395	29.7764	32.9322
LPGAT1	44.7863	46.0481	43.8045	50.1776	53.5123	51.1162	59.9174	21.5526	57.7431	59.4077	59.5306	61.6492
NEK2	84.2944	83.8028	83.3163	31.7069	29.4902	41.2984	7.7608	2.58488	5.16692	5.62304	3.33285	2.71518
1700034H15RIK	0.173226	0.0641902	0.0673149	0.0805654	0.0681293	0.068249	0.0615757	0	0.0679273	0.106513	0.101428	0.0574042
SLC30A1	44.1015	22.5466	46.6147	8.44409	9.95098	7.34294	12.762	6.64529	12.7754	25.8102	23.7287	21.6644
RD3	0	0.0187484	0	0	0	0	0.00786832	0	0.00867995	0.00837574	0.00864049	0
TRAF5	0.376016	0.113743	0.15904	0.166553	0.299293	0.123455	0.286414	0.189509	0.228192	0.101628	0.174734	0.197786
MIR3473C	0	0	0	0	0.458611	0	0	0	0	0	0	0
RCOR3	19.0912	14.7091	20.4086	23.204	24.454	21.1453	24.8672	11.7407	28.6057	20.575	19.7736	21.4378
GM10516	1.28732	0.857573	1.49351	1.82381	1.37952	1.52441	1.87666	1.54363	1.97098	1.34091	1.2986	1.35807
KCNH1	0	0	0.0115891	0.0269702	0	0.0102812	0.0463795	0.00920624	0.05628	0.00987409	0.0305586	0.028825
HHAT	7.9959	5.9682	6.96894	15.5776	15.7369	15.3051	15.7271	11.5422	15.6511	5.60987	5.34502	5.21108
1700065J18RIK	0	0	0	0	0.0919492	0	0	0	0	0	0	0
SERTAD4	160.276	181.968	161.485	293.378	317.408	269.801	389.424	227.326	421.786	203.234	201.332	222.592
GM15867	14.6248	17.0966	16.3643	32.9856	29.7704	28.9975	32.9311	37.9911	31.997	23.2017	24.6413	27.7237
SYT14	0	0	0	0.0196762	0.00935941	0.0328155	0.00845909	0	0.00933166	0.0045023	0.00928923	0.0105147
DIEXF	18.3523	16.1714	17.9869	8.41757	9.00565	7.89464	8.62954	6.13826	9.53972	8.79954	8.18055	8.77834
IRF6	208.563	187.496	219.285	202.348	202.528	197.975	164.085	104.281	170.907	99.2276	102.284	105.344
A130010J15RIK	18.7129	17.6107	19.934	17.8331	16.9751	17.8687	13.6346	8.79548	13.7079	9.34963	8.37581	8.99096
TRAF3IP3	0.160314	0.0942943	0.0593307	0.0552297	0.122599	0.228084	0.126635	0.109974	0.122235	0.0337004	0.0521485	0.118056
HSD11B1	1.41187	1.66088	2.38037	10.5928	13.805	13.0567	5.13487	2.88253	4.15228	9.91796	8.59851	9.67509
G0S2	0	0	0	0.0463196	0	0	0	0.118584	0	0.0423954	0.0874709	0
LAMB3	300.467	266.472	332.069	449.898	452.969	459.038	532.631	400.8	507.556	554.611	501.574	518.263
CAMK1G	0	0	0	0	0.0454311	0.0151703	0	0	0.0150988	0.0437089	0.0601206	0.0680519
MIR205	0	0.58823	1.85059	0	0.546287	1.09449	0.493737	0	0	1.05116	0.542191	1.22744
4930503O07RIK	0	0	0	0	0	0	0	0	0	0	0	0
PLXNA2	0.232812	0.235612	0.254684	0.410466	0.54198	0.411414	0.349889	0.0785113	0.28529	0.30444	0.384226	0.28364
CD34	0.0720729	0.0457836	0.0640165	0.0297958	0.0708651	0.0993855	0.128097	0.0889943	0.042393	0.149993	0.112534	0.159225
GM16897	0	0.0160577	0	0.0313508	0.044738	0.0896333	0.0404345	0.0267539	0	0.0717368	0.0888052	0.0837672
A330023F24RIK	0.0072725	0.00769964	0.00807446	0	0.0214519	0	0.0840161	0.0705567	0.0356471	0.178868	0.28388	0.297231
MIR29B-2	0	0	0	0	0	0	0	0	0	0	0	0
MIR29C	0	0	0	0	0	0	0	0	0	0	0	0
CD46	0.124586	0.131903	0.034581	0.289717	0.428743	0.398818	0.470536	0.302178	0.488539	0.294635	0.121579	0.240833
CR1L	53.784	40.8179	52.219	40.6215	43.5622	38.2427	56.0377	47.8578	54.4418	66.9843	66.6836	64.6583
CR2	0	0	0	0	0	0.0119906	0	0	0	0.0230316	0	0
B020014A21RIK	0	0	0	0	0	0	0	0	0	0	0	0
H60C	0	0.0425981	0.0148906	0.180197	0.303299	0.343462	0.584002	0.201091	0.631094	0.038061	0.353377	0.355551
PPP1R14C	18.7107	23.2169	18.2811	7.56504	6.9026	7.12115	7.22296	4.43589	6.13376	2.40716	1.56299	2.00066
IYD	0.0490658	0.0259738	0.0272382	0	0	0	0.0654042	0	0	0.0232073	0	0
PLEKHG1	2.36447	2.84864	2.60258	19.5974	21.2042	21.5928	15.3063	5.5237	16.6553	18.4529	17.6488	18.5417
MTHFD1L	143.579	141.836	139.135	92.6609	82.853	103.031	29.017	19.984	28.2995	14.9079	13.5833	14.6431
AKAP12	1.88691	3.20791	1.69882	6.51311	7.69471	6.29645	5.62166	1.76558	5.79839	2.01952	2.35485	2.87928
ZBTB2	16.7537	16.2007	16.8203	10.7208	11.8338	9.90573	14.9195	9.93361	15.0123	16.2139	16.1666	15.9456
RMND1	0.102165	0.108166	0.158803	0.190063	0.241087	0.120755	0.163422	0.0180216	0.320496	0.154632	0.0996997	0.045141
GM5512	2.67473	1.62145	2.82599	2.96506	2.88442	2.9426	3.33537	2.65396	3.01331	2.85669	2.56809	2.95454
ARMT1	25.902	26.8993	27.8241	28.7825	27.2685	26.8452	23.0034	17.7523	22.4327	20.2887	18.2252	21.0487
CCDC170	0.193206	0.0557875	0.0780043	0.108919	0.259048	0.294104	0.10926	0.0464742	0.137749	0.149537	0.0514212	0.0776064
ESR1	1.38364	1.08156	1.52186	2.20073	2.01313	2.11007	0.900162	0.323145	0.739479	1.77371	1.80875	1.84739
SYNE1	10.4157	5.51704	10.7884	6.63187	9.11714	8.15102	5.67818	2.0809	6.03894	3.01133	3.9778	3.84354
MYCT1	0	0	0	0	0	0	0	0	0	0	0	0.0150172
VIP	0	0	0	0	0	0	0	0	0	0	0	0
FBXO5	91.9531	77.3208	96.2664	10.2643	11.1627	15.507	5.55543	3.15333	5.22663	5.20168	4.61117	3.83379
MTRF1L	4.46852	3.78478	5.31337	5.12488	5.13063	4.88409	4.34248	3.94117	3.92842	3.84528	3.79802	4.26723
RGS17	0.106099	0.112331	0.0819473	0.214546	0.263071	0.227184	0.0696899	0.0528921	0.0994898	0.0218189	0.00450171	0.0662426
OPRM1	0	0	0	0	0	0	0	0	0	0	0	0
IPCEF1	0	0	0	0.00947752	0.0360655	0.0316128	0.00407453	0	0	0	0.00447439	0
CNKSR3	28.1382	18.0393	32.9443	17.4853	17.8735	17.3329	18.384	9.74147	18.0783	22.2749	23.7595	23.8681
ULBP1	26.2948	44.9254	21.8151	20.3287	21.3818	23.0969	8.69347	1.00754	8.20563	3.51695	2.71602	3.02844
LRP11	3.53672	3.9564	3.32166	5.25306	4.94279	4.79811	5.17894	3.53133	4.88452	4.92375	4.37392	4.42267
PCMT1	84.0161	77.4119	81.9461	47.2968	47.4372	48.2194	52.3665	42.6737	50.7549	64.4873	57.8325	61.5217
A630066F11RIK	3.34689	4.05423	3.51509	6.04564	5.72184	4.95972	5.54656	5.95701	5.6162	4.62072	3.88404	6.02845
NUP43	62.9677	62.108	55.5714	15.1346	14.4846	17.2794	16.2405	14.7237	14.1259	12.3841	11.9467	12.2934
BC020402	1.55405	1.59048	1.36116	1.90954	2.17316	2.0069	2.83876	2.14735	2.77611	2.23779	1.87041	1.85013
LATS1	76.1949	52.5955	75.3705	49.736	56.4858	48.5855	51.5176	15.4718	54.9939	57.3612	60.3752	61.8676
KATNA1	65.9831	52.3714	67.4221	55.3263	58.2221	54.5927	47.5523	44.1915	43.318	41.4777	41.9164	43.5902
GINM1	15.1414	13.102	15.9489	23.1977	26.7214	22.8965	29.4124	21.6582	31.3997	43.5895	46.4118	45.4049
PPIL4	68.1121	47.6929	68.5257	31.5238	34.364	29.3488	38.1535	21.6662	37.3826	40.8114	40.1281	39.6721
ZC3H12D	0.0276916	0.0293181	0.0204968	0.171721	0.172441	0.181836	0.114839	0.0162824	0.0904895	0.0261954	0.0270234	0.183531
MIR5104	0	0	0	0	0	0	0	0	0	0	0	0
TAB2	169.245	114.174	179.367	105.486	114.1	104.123	106.334	47.0153	115.415	118.571	136.522	132.964
UST	0.855444	0.541545	1.04769	2.35159	2.36724	2.02394	2.31978	1.27563	3.03457	2.43601	2.32367	2.28927
SASH1	13.0126	10.0069	14.9848	24.4896	28.1127	24.774	27.1846	7.78426	28.6533	41.4462	45.6666	48.9837
SAMD5	2.45309	1.12223	2.82447	3.80301	4.74952	3.80331	3.71401	0.307177	3.91898	1.18892	0.945737	0.869783
GM6150	0	0	0	0	0	0.0124875	0.0112665	0	0.0124286	0	0	0
STXBP5	27.688	23.1517	28.49	21.1589	24.8209	21.2269	18.3115	8.79137	20.2942	16.7629	16.4598	17.7574
ADGB	0.0144809	0	0.00803886	0.00748321	0.0569528	0.0285265	0.0128686	0.0255439	0.014196	0.0136985	0	0
RAB32	53.6176	57.5457	57.9372	44.8265	46.7328	48.8622	44.0517	28.0171	35.0899	25.0906	19.691	20.1147
GM5177	0.00998167	0.0422717	0	0.103164	0.0294432	0.0786532	0.0354812	0.0176074	0.0293559	0	0.0292224	0
GRM1	0.194578	0.257508	0.18603	0.407791	0.605839	0.511077	0.0336222	0.0143013	0.068882	0.0357904	0.0105491	0.0119407
4930567K20RIK	0	0	0	0	0	0.0838126	0	0	0	0	0	0
SHPRH	17.2329	14.6796	17.8282	16.558	18.8517	17.4066	14.5841	3.27875	15.2751	15.2168	14.4316	15.5448
FBXO30	17.9964	17.8567	18.3897	17.3552	18.3413	17.2602	15.5594	7.02407	16.0056	14.1937	14.1521	15.3091
EPM2A	2.06585	0.852634	1.7494	9.98802	7.84951	10.2775	4.91632	1.9147	5.32047	5.43211	4.64706	5.64689
UTRN	29.6979	26.7483	31.0722	37.5431	43.7957	39.3286	34.7672	8.13001	38.7304	35.2168	38.2476	37.476
B230208H11RIK	1.18264	1.04906	0.816224	1.38747	1.91709	1.92046	1.67587	1.69147	2.06807	1.39087	0.873377	0.917981
STX11	10.6751	10.2503	11.9048	14.2272	14.6202	14.4596	14.9794	7.46824	13.8967	5.19085	4.24701	4.35443
SF3B5	90.7456	108.936	83.665	53.996	51.7737	60.4327	57.9543	77.2217	53.8908	54.1932	43.0473	46.5088
PLAGL1	0.818664	0.805923	0.948806	3.47352	3.19153	2.91421	2.13787	0.918398	3.34399	1.79342	2.44578	2.52253
HYMAI	0	0.00791132	0.00829644	0	0.0293888	0.0147202	0.0132809	0	0.00732542	0	0.0145842	0.0577789
ZC2HC1B	0	0	0	0	0	0	0	0	0	0	0	0
LTV1	134.155	91.4245	130.111	32.2671	34.0379	29.9302	48.9749	33.3408	44.935	56.2166	62.3728	58.917
PHACTR2	0.14412	0.143609	0.127069	0.582666	0.683517	0.642967	0.391755	0.186929	0.544361	0.445087	0.628754	0.515047
FUCA2	25.4737	27.1217	26.0231	63.7359	62.0346	60.4872	70.9693	47.4969	70.8711	84.1871	89.804	87.4975
PEX3	30.6958	23.8834	30.8889	27.0653	26.15	25.2985	27.2641	17.527	27.1505	27.5512	29.4798	29.1175
ADAT2	22.8296	17.6186	22.6045	13.2218	13.9591	15.2129	9.9128	4.86185	9.60983	7.50205	8.52579	8.98994
AIG1	63.8041	57.5327	63.3978	43.1966	40.3195	42.6852	33.5741	35.0608	33.8748	44.9623	45.579	49.4142
HIVEP2	31.8242	20.2209	36.1538	29.9131	33.2	31.8183	25.6927	7.19111	28.0207	25.33	28.5048	29.659
ADGRG6	1.35325	1.02689	1.57341	5.45643	7.02975	6.2641	21.1664	5.42475	15.0825	25.8883	20.6478	21.9667
VTA1	74.5063	61.1617	76.8339	61.9159	62.9685	64.2587	72.2161	63.3998	72.3975	68.5655	71.4562	73.0718
1700016L04RIK	0.166069	0.131867	0	0	0	0.0817863	0.0368946	0	0	0	0	0
GJE1	0	0	0	0	0.0251506	0	0	0.0225606	0	0	0	0
NMBR	0.0322086	0	0.0357603	0.066577	0.0316688	0.0951733	0	0	0	0	0	0
C330004P14RIK	0	0	0	0	0	0	0	0	0	0	0	0
GM20125	0	0	0	0	0.0327676	0.0109417	0	0	0	0	0	0
CITED2	223.767	133.894	275.179	151.113	140.345	160.417	125.174	98.7644	128.624	338.697	328.656	337.996
TXLNB	0	0.00897456	0	0.236545	0.158358	0.258828	0.0677961	0.0299053	0.0581695	0.0240561	0.0661772	0.0280903
HECA	14.6198	19.6235	15.0995	34.7561	35.01	35.3658	29.0237	8.89616	30.4722	25.7494	23.2957	28.2012
ABRACL	84.1435	99.209	76.0221	116.708	117.267	110.26	136.742	137.278	112.987	128.706	124.49	116.594
REPS1	79.9916	58.0591	86.1688	41.9856	47.7185	42.3725	40.6019	31.1837	41.8191	37.4867	36.4324	38.7997
ECT2L	0	0.013793	0	0.0403938	0.0128095	0	0	0.0229807	0.0127715	0.0123239	0	0.0431719
CCDC28A	6.15636	6.8267	6.33159	15.3711	16.6303	16.5638	15.0882	14.0032	15.6281	9.68577	10.5295	10.0574
NHSL1	58.4148	58.2213	54.8708	53.1897	58.647	56.762	55.6213	18.8143	56.7272	38.2149	39.7752	39.476
HEBP2	20.4925	23.3506	20.4683	29.7046	29.7569	32.3225	42.8729	48.2907	39.8491	18.3187	19.8243	18.7689
ARFGEF3	0.634582	0.525799	0.71477	0.898242	0.976613	1.1278	0.339174	0.0567804	0.342604	0.113099	0.116674	0.172702
GM4922	0	0	0	0	0	0	0	0	0	0	0	0
4930444F02RIK	0	0	0	0.00929257	0.00884043	0.00885597	0	0.0237901	0	0	0	0
PERP	502.164	489.364	510.205	964.491	934.513	894.987	2396.19	2358.85	2683.69	2140.16	2121.61	2045.63
TNFAIP3	26.6972	7.69525	37.7293	11.6505	10.1863	12.5365	11.2157	4.54688	9.10014	6.37007	6.02581	5.32219
GM20139	0	0	0.0202316	0.0125554	0	0.0119655	0	0	0	0	0	0
OLIG3	0	0	0	0	0	0	0.0325016	0	0.0358542	0	0	0
IFNGR1	42.8024	39.7328	44.225	50.7486	49.9252	50.0307	67.0363	53.2295	59.782	52.6299	50.8858	51.2564
IL22RA2	0	0	0	0	0.0150517	0.0301562	0	0	0	0	0.0149388	0
IL20RA	0.21713	0.172412	0.241074	0.243111	0.106746	0.302978	0.112557	0.0638352	0.0354764	0.0171165	0	0.039974
SLC35D3	0.0143707	0	0	0.0148526	0.0565196	0	0.0510827	0.0253496	0.07044	0	0	0
PEX7	20.167	19.4085	19.7553	21.9564	20.8881	22.6931	21.0592	20.7603	22.5861	23.5306	22.6392	25.9784
MAP3K5	23.3843	21.3608	24.1818	17.2249	18.1226	16.1327	18.303	12.0115	20.8777	15.5005	15.7512	16.6761
MAP7	42.0485	42.0022	41.0314	62.5159	70.07	62.827	54.4168	32.4152	62.7685	47.0621	47.8397	48.6222
4930405J17RIK	0	0	0	0	0	0	0	0	0	0	0	0
GM6251	2.87184	3.10808	2.9051	2.44046	2.44722	2.95439	1.92824	2.81436	1.87689	0.965927	1.7438	1.05742
MIR6413	0	0	0	0	0	0	0	0	0	0	0	0
BCLAF1	183.943	119.61	190.345	63.6543	76.1271	63.1607	72.036	28.6176	71.2701	81.8779	86.6698	86.6871
MTFR2	9.36737	9.50143	7.56388	3.5036	2.83396	4.01646	1.3971	0.563311	0.995369	0.712617	0.623273	0.795945
PDE7B	0	0	0	0.0378458	0.0360043	0	0.00813524	0	0.0089744	0	0	0.0101121
AHI1	11.5923	7.92297	13.0435	7.84167	8.07998	7.86041	5.68137	2.83898	6.02747	4.17449	3.79257	4.02254
MYB	4.10115	8.08041	3.26512	0.454881	0.609781	0.522181	0.488901	0.158802	0.470689	0.331182	0.263559	0.176787
HBS1L	64.2109	57.2486	66.405	45.1922	46.9943	43.8066	46.0006	35.617	43.9104	43.1457	40.8023	44.6071
4930455C13RIK	0	0	0	0	0	0	0	0	0	0	0	0
ALDH8A1	0.13475	0	0.0561036	0.0348171	0.033123	0.0829531	0.0149684	0	0.0330248	0.0159337	0.0164373	0
1700020N01RIK	0	0	0	0	0.0700235	0	0.0316439	0.188437	0.0698159	0.0336845	0	0.078667
GM5420	0.0685052	0.0181322	0	0.194706	0.134714	0.15182	0.121756	0.105736	0.117526	0.0972057	0.116991	0.113507
SGK1	125.384	199.613	120.825	113.432	116.036	109.973	264.329	121.176	214.321	402.753	314.082	480.816
4930444G20RIK	0.0213329	0	0	0.0881929	0.0209754	0.0210123	0	0.0376307	0.0836529	0.0201803	0.0208182	0.0235646
E030030I06RIK	0.197804	0.174518	0.091507	0.102218	0.145867	0.276011	0.219726	0	0.177753	0.124744	0.0965156	0.109248
RAET1A	0	0	0	0	0	0	0	0	0	0	0	0
RAET1E	0	0	0	0	0	0.0292094	0	0	0	0	0	0
RAET1B	0	0	0	0	0	0	0	0	0	0	0	0
RAET1C	0	0	0	0	0	0	0	0	0	0	0	0
H60B	0	0	0	0.164237	0.078123	0.0782603	0	0.0350389	0.0778914	0.112742	0.0775373	0.0438831
C920009B18RIK	0.0334712	0.0265778	0.0464527	0.147022	0.115186	0.0906624	0.0669252	0.00738029	0.123048	0.0316627	0.0898247	0.110918
RAET1D	0	0	0	0	0	0	0	0	0	0	0	0
GM10825	0.157835	0.290235	0.129124	1.08179	0.841291	1.43189	0.413402	0.212475	0.374608	0.110015	0.137813	0.220226
SLC2A12	0	0	0	0.0103794	0	0	0.00892454	0	0.0196902	0.00950008	0.0196007	0.0110933
TBPL1	61.9865	36.6744	66.5459	22.2876	21.1773	22.1594	20.5182	15.6816	18.2546	19.927	17.0944	19.4656
MIR7663	0.619355	1.31146	0.687652	0	1.21795	0	0	0	1.82151	0	0.604409	0.684145
TCF21	0	0	0	0	0	0	0	0	0	0	0	0
EYA4	11.1434	7.90429	9.62965	17.0707	18.8864	16.7317	20.4688	4.50363	22.7971	7.92559	7.42057	7.51374
RPS12	3715.99	3591.78	3733.26	4022.86	4040.76	4167.11	3203.09	4896.08	2822.56	2435.17	2474.14	2346.3
SNORA33	7.55613	10.2856	10.7863	2.23128	2.83028	2.83526	3.51729	5.71234	2.82189	6.80748	2.80906	5.56438
SNORD100	3.33358	7.64699	9.86983	4.01958	2.73143	4.37797	5.43111	7.35044	6.536	2.62789	4.87972	2.45487
SLC18B1	5.10045	4.10289	4.48004	5.72567	6.52078	5.48288	6.23672	3.15954	5.78341	5.37916	6.25096	6.0606
VNN3	0	0	0	0.539031	0.184609	0.328771	1.83536	0.79119	0.858955	0.670975	0.590392	0.414794
VNN1	0.0625507	0.0827807	0.0173621	0.32324	0.399766	0.338858	2.09838	0.468935	1.19574	1.52365	2.24327	2.33193
TAAR1	0	0	0	0	0	0	0	0	0	0.0357751	0	0
TAAR2	0	0	0	0	0	0	0	0	0	0	0	0
TAAR3	0	0	0	0	0	0	0	0	0	0	0	0
TAAR4	0	0	0	0	0	0	0	0	0	0	0	0
TAAR5	0	0	0	0	0	0	0	0	0	0	0	0.0411566
TAAR6	0	0	0	0	0	0	0	0	0	0	0	0
TAAR7A	0	0	0	0	0	0	0	0	0	0	0	0
TAAR7B	0	0	0	0	0	0	0	0	0	0	0	0
TAAR7D	0	0	0	0	0	0	0	0	0	0	0	0
TAAR7E	0	0	0	0	0	0	0	0	0	0	0	0
TAAR7F	0	0	0	0	0	0	0	0	0	0	0	0
TAAR8A	0	0	0	0	0	0	0	0	0	0	0	0
TAAR8B	0	0	0	0	0	0	0	0	0	0	0	0
TAAR8C	0	0	0	0	0	0	0	0	0	0	0	0
TAAR9	0	0	0	0	0	0	0	0	0	0	0	0
STX7	40.924	41.1356	42.6851	61.5387	56.5533	59.6595	68.0749	49.5698	66.045	63.1299	61.3647	60.6962
MOXD1	75.8676	65.1827	73.1994	64.7834	65.5714	63.0312	69.5659	37.6561	61.5928	13.0762	11.9349	13.3875
CTGF	132.688	51.6565	163.072	50.573	57.9791	49.0955	1278.21	1027.96	1509.19	3049.68	3076.39	3490.27
ENPP1	9.24319	7.68611	9.87274	29.9549	29.374	27.0658	68.1781	35.4743	79.1215	141.123	149.243	151.145
ENPP3	7.90508	8.62514	9.01521	61.9626	65.9153	61.9332	232.037	117.071	250.63	1095.36	1261.6	1204.2
MED23	26.8574	25.6609	27.0542	27.6395	29.3064	26.5214	32.0196	14.0605	33.413	32.8923	33.4922	33.1095
MIR6905	0	0	0.59924	0	0	0.531611	0	1.42809	0	0.510561	0.5267	0
ARG1	6.59946	8.58489	7.4408	37.1439	36.7451	37.4899	130.341	94.1228	115.851	1578.65	2468.97	2140.84
AKAP7	11.1297	10.0415	12.2496	14.2161	15.487	14.2154	13.0942	8.93068	13.4487	8.89191	10.4834	10.1025
EPB4.1L2	80.869	76.952	85.6418	133.661	141.956	136.469	125.435	50.1958	106.033	46.4619	46.3444	44.0519
SMLR1	0	0	0	0	0	0	0	0	0	0	0	0
4930401C15RIK	0	0	0	0	0	0	0	0	0	0	0	0
MIR680-3	0	0	0	0	0	0	0	0	0	0	0	0
TMEM200A	0	0	0	0.00948904	0.0180547	0.0180864	0.00815896	0	0	0.0173702	0	0.0507082
GM9767	0	0	0	0	0	0	0	0	0	0	0	0
SAMD3	0	0	0	0.0109869	0	0	0	0	0	0	0	0
L3MBTL3	4.61874	5.65225	4.10737	10.0967	10.3351	8.89136	8.61254	3.14561	9.26205	7.82681	7.19869	7.37757
GM8709	0	0	0	0	0	0	0	0	0	0	0	0
ARHGAP18	5.63157	5.45349	5.96257	8.21766	8.52666	9.50902	4.93956	2.34065	5.05986	12.4336	11.3788	11.5873
LAMA2	0	0	0	0.00402012	0.0305961	0.0114937	0.0207397	0.00686132	0.0381317	0.0331158	0.0379584	0.0644489
4930579H20RIK	0	0	0	0	0	0	0	0.0219802	0	0	0	0
PTPRK	118.339	78.8596	122.459	51.3805	61.2389	51.7015	62.0064	33.5	68.7922	81.8121	85.4247	87.7964
THEMIS	0	0.0132077	0.0138507	0	0	0.00614376	0.00554303	0	0.030574	0.00590049	0.018261	0.00689002
4930519F09RIK	2.22527	1.39805	2.36205	0.278007	0.216393	0.337203	0.217308	0.301947	0.287669	0.370116	0.14318	0.243104
2310057J18RIK	0	0	0	0	0	0	0	0	0.0280799	0.18967	0.279522	0.221478
SOGA3	0	0	0.0106302	0.00989543	0.00941396	0.00943051	0.0170168	0	0	0.0181142	0	0.021152
9330159F19RIK	0	0	0	0.0207552	0.0131635	0.0263733	0.00594864	0.00590397	0.026249	0	0.0130648	0.0295768
ECHDC1	24.3792	26.7293	23.018	41.7611	44.3667	41.0979	33.9964	18.8615	33.5549	34.1097	34.4806	35.2498
RNF146	40.1292	26.2744	39.6593	24.2819	26.9103	23.283	31.2083	22.3592	31.8757	36.6055	38.2094	36.8159
RSPO3	0.141914	0.200332	0.157563	0.798548	1.11628	0.792092	0.784704	0.194703	0.819273	0.850225	0.307754	0.330937
CENPW	14.8174	16.6136	13.8713	5.21665	4.34861	7.43271	2.28713	2.07161	1.83717	1.67823	1.26798	1.24205
TRMT11	22.3737	17.0579	21.3557	10.9412	9.87345	8.23445	11.1297	8.57416	12.0108	12.2262	11.1592	11.5522
GM20300	1.5266	2.65114	1.48765	10.5791	11.3062	9.88735	15.0205	14.6462	15.4071	22.7942	20.01	22.3343
HINT3	13.2449	13.8504	14.5849	43.8161	44.4596	43.5218	45.4891	33.8965	48.5849	53.5576	49.1586	55.344
NCOA7	9.05235	7.4634	9.19403	6.60543	7.40444	6.93644	6.03177	2.19109	5.62013	7.31122	7.90148	7.37244
HEY2	0.11937	0.142179	0.132533	0.138794	0.0586848	0.0881819	0.0132599	0.0263207	0.0585108	0.0705752	0.0436836	0.0164822
HDDC2	61.2488	62.6735	56.7859	68.3601	67.5691	62.2977	52.5122	67.5722	48.9017	64.709	67.3192	64.5173
TPD52L1	11.6592	10.2604	9.17069	12.7282	13.4575	12.2182	12.269	12.2032	9.64666	17.6017	20.195	21.2123
GM3258	1.48994	3.32391	1.53608	5.77461	4.55187	4.97917	3.92486	5.49109	2.97342	2.51685	2.85605	3.46794
RNF217	24.2536	22.4054	24.5521	28.8077	28.9257	28.6122	29.6415	20.6573	30.9637	22.8057	23.23	23.4784
NKAIN2	3.75284	3.90918	4.18908	2.13744	2.14255	1.98733	3.1557	1.84183	3.61967	1.63189	1.70316	1.70497
TRDN	0	0	0	0.00865028	0.0164588	0	0.00743778	0	0.024615	0.00791743	0	0
D830005E20RIK	0	0	0	0	0	0	0	0	0	0	0	0
CLVS2	0	0	0	0	0.014859	0	0	0	0	0	0	0
GM4794	0	0	0	0	0	0	0	0	0	0	0	0
SULT3A1	0	0	0	0	0	0	0	0	0	0	0	0
RSPH4A	0	0	0	0	0.0305322	0.0101953	0.00919839	0	0	0.0293748	0.0404043	0.0228673
ZUFSP	11.6187	6.76813	11.853	10.5217	11.2825	10.169	11.6601	6.38531	9.51001	11.5351	12.5704	12.0926
A830082N09RIK	0.390336	0.260202	0.379875	0.139455	0.175313	0.113917	0.239815	0.102006	0.198414	0.278073	0.188107	0.266153
RWDD1	177.695	162.66	159.723	90.0039	101.074	90.6245	103.577	117.859	97.6595	105.93	103.247	98.508
TRAPPC3L	0.159412	0.0675099	0.0353981	0.494271	0.689658	0.471048	0.141663	0.0281198	0.0625103	0.0301597	0.0622261	0.0352176
FAM26D	0.111897	0.1077	0.135531	0.683382	0.390079	0.671313	0.216957	0.062804	0.119668	0.0481143	0.0893432	0.0786564
FAM26E	0.253845	0.268755	0.32881	1.44296	1.08156	1.29182	0.88353	0.578377	0.725816	1.40076	1.0941	0.911299
FAM26F	0.349174	0.110905	0.310143	0.0721763	0.0686645	0.0687852	0.403386	0.338763	0.0684609	0.132123	0.170374	0.15428
DSE	89.8687	67.0384	92.7893	73.0486	75.1654	70.0217	97.1226	39.0084	98.5675	62.9265	52.9342	59.6607
TSPYL1	65.1632	60.7116	66.9344	121.009	123.306	123.343	117.435	82.1679	124.053	119.507	114.258	120.864
TSPYL4	16.081	13.4768	15.6709	23.1281	24.0982	23.1196	21.3755	10.9621	20.1141	16.3943	14.6909	13.6113
NT5DC1	24.4545	21.9586	23.1974	19.4806	19.9551	17.5377	22.0655	10.5389	21.696	29.9757	27.0816	29.2253
COL10A1	0	0	0	0.0499008	0.0356046	0.0356672	0.34325	0.074522	0.212994	1.32452	1.03657	1.06665
FRK	12.271	10.8848	13.3098	17.5685	19.3046	17.8897	25.787	10.1707	21.4143	59.305	52.0142	50.1958
HS3ST5	0.012207	0.0258479	0.0271062	0.0252326	0	0.024047	0.0976308	0.0861312	0.0478673	0.115474	0.0238249	0.0269679
HDAC2	186.924	171.475	183.57	112.368	123.732	109.577	125.199	93.4147	122.663	112.693	114.912	118.285
MARCKS	58.1782	71.9917	59.4129	102.506	112.907	103.157	78.345	49.4656	70.4293	71.5469	65.2737	61.4528
4930591E09RIK	0	0	0	0	0	0	0	0	0	0	0	0
RFPL4B	0	0.0759006	0.0795954	0	0	0	0	0.0632296	0	0.0678165	0.03498	0
LAMA4	14.1412	12.7223	17.9693	27.7129	33.3565	31.7103	30.481	13.0235	25.8575	19.0933	16.1477	17.0217
FAM229B	3.00175	1.863	1.60892	7.22109	4.73249	6.16815	6.80681	8.67285	6.03759	2.39894	2.87881	2.45824
TUBE1	9.02917	8.01631	9.07964	4.23935	3.39895	4.77706	2.16644	1.08077	1.53005	1.47643	1.18323	1.41057
WISP3	0	0	0	0.0275369	0	0	0	0	0	0.025204	0.0520014	0
FYN	100.557	67.1364	111.999	44.7482	45.6455	42.7164	46.53	33.9369	49.621	21.6472	21.1209	23.0238
TRAF3IP2	30.4538	24.3597	33.0219	55.3637	59.6148	55.7867	41.5373	35.263	42.3856	32.5605	32.8053	33.2465
E130307A14RIK	5.19938	2.78844	4.66356	2.46393	2.36637	2.52707	3.02651	3.16399	3.67257	2.38405	2.1049	2.70862
REV3L	20.7873	15.9886	20.5781	20.0088	24.5804	20.0631	17.9723	4.50855	19.5345	15.988	16.8218	16.701
AA474331	2.37036	4.66065	4.88753	8.8994	6.51627	7.29008	6.31933	1.32264	8.34644	5.35403	4.95678	6.57252
2010001E11RIK	0.628299	0.647696	0.477294	1.12785	1.138	1.00971	1.04322	0.291659	1.05358	0.891527	1.06492	0.8584
G630090E17RIK	0.487629	0.269358	0.659097	2.60754	2.18882	2.54768	1.86523	0.878863	1.66273	2.24624	1.77931	2.06088
BC021785	0.0694845	0.0200634	0.0631201	0.2285	0.149062	0.180433	0.140337	0.0501418	0.136235	0.119509	0.117123	0.097686
AI317395	0.0141025	0.074654	0.0313153	0.0145754	0.0693309	0.0694527	0.0626617	0	0	0.0266811	0.0550488	0.0934666
SLC16A10	0.213222	0.237948	0.281522	0.11912	0.158653	0.113523	0.0921803	0.0406614	0.0790913	0.0436111	0.0449896	0.0445592
RPF2	77.2204	52.9942	73.8397	20.9906	22.7799	21.9733	23.8927	25.5469	22.4968	23.2589	23.8966	22.2796
GTF3C6	57.4858	55.9603	63.5371	36.3677	40.8987	35.0238	47.6292	47.9575	44.1543	59.0399	61.376	56.6667
AMD1	0	0	0	0	0	0	0	0	0	0	0.0115	0
AMD2	0	0	0	0	0	0	0	0	0	0	0	0
CDK19	62.6793	65.6374	65.0331	119.623	118.396	115.983	85.8924	40.7588	101.928	67.4535	69.3507	80.4185
SLC22A16	0	0	0	0	0	0	0	0	0	0	0	0
DDO	0.0125935	0	0	0.104126	0.0371475	0.111638	0.0783396	0.0444293	0.123458	0.0953048	0.0983172	0.139109
METTL24	0.296512	0.156964	0.137171	0.408606	0.898925	0.924843	2.17386	0.84994	0.605581	0.677854	0.313471	0.354825
CDC40	35.2432	31.8333	34.8289	32.6884	33.7032	33.4417	27.3183	11.071	25.1061	25.0547	24.5757	23.7995
WASF1	18.031	18.2273	17.9137	14.5164	15.398	14.5641	13.3507	8.46771	12.6944	7.44218	9.41243	10.2286
GPR6	0	0	0	0	0	0	0	0	0	0	0	0
FIG4	24.9517	24.8971	23.7309	18.3928	21.4369	19.513	21.0314	12.6732	21.6117	23.3078	24.6885	23.175
ZBTB24	7.29563	6.15881	6.79083	11.4604	12.1835	10.5839	14.0146	8.31304	13.5018	12.4625	11.9461	12.0056
MICAL1	0.0106036	0.0224528	0.0353187	0.208223	0.0625554	0.146219	0.028269	0.0935223	0.0727649	0.0100307	0.0413909	0.0117128
SMPD2	13.0888	13.6578	13.0135	28.9321	27.3157	29.7098	29.1521	36.8372	31.6043	39.4649	36.0635	41.6807
PPIL6	0.211854	0.0747657	0.196013	1.5327	1.73586	2.29537	0.721687	0.560557	0.865358	5.27739	4.16929	5.49937
CD164	223.186	238.938	217.857	262.97	277.057	264.027	291.976	133.547	294.519	529.598	558.181	586.442
CCDC162	0	0.0754236	0	0.147256	0.0350228	0.233896	0.16882	0.0523601	0.104757	0.123549	0.115867	0.170499
5730435O14RIK	0	0	0	0	0	0	0	0	0.0600281	0	0	0
CEP57L1	12.2981	11.1604	10.4911	7.60663	7.87458	8.8394	6.03406	4.32753	5.8186	4.76125	5.03531	4.93031
SESN1	7.08316	5.85799	6.48234	19.9505	19.5361	17.7872	54.9614	38.5413	61.6623	65.1527	58.4007	57.3686
ARMC2	0.24074	0.221992	0.232798	0.866828	0.786473	0.963784	1.7805	1.5411	2.59604	2.72544	1.77335	1.97298
FOXO3	23.3955	20.9344	27.4563	52.5092	52.9246	57.5516	66.8577	16.3438	81.6514	84.6411	86.1552	83.4512
LACE1	6.94574	6.04849	7.4279	14.8079	14.4421	11.6244	13.0796	14.2411	15.151	17.763	19.5275	20.2437
SNX3	215.901	237.964	206.931	240.041	242.902	250.517	241.163	255.227	253.586	274.754	302.85	280.947
NR2E1	0	0	0	0	0	0	0	0	0.011456	0	0	0
OSTM1	28.2507	28.1819	25.8316	29.6651	31.8142	28.4197	39.6552	24.651	36.8404	71.4904	64.5973	65.1165
SEC63	59.1888	54.0114	59.9995	57.3865	61.4177	53.8388	59.7733	34.4876	61.9172	71.8874	75.7672	77.7094
SCML4	0.0318488	0.00842985	0.00884021	0.148125	0.258349	0.282331	0.247649	0.077248	0.226361	0.745667	0.940178	1.02023
SOBP	1.70696	1.19678	1.70146	6.78233	6.76562	5.425	9.62728	6.74469	13.3126	5.93502	6.57423	6.36887
9030612E09RIK	0.161888	0.192821	0.17974	2.21694	2.42742	2.01312	2.08602	2.35592	2.89633	1.11027	0.789908	0.871763
PDSS2	9.58002	8.84285	10.9875	9.7282	9.7487	8.77643	8.89359	6.79237	9.62861	7.09155	6.33544	7.49999
BEND3	14.9649	14.6998	14.8606	7.42991	7.75006	6.43488	10.9342	5.00739	11.1865	10.7295	10.4896	10.5902
1700021F05RIK	47.2048	33.5854	50.168	27.0027	28.6259	22.2531	24.788	33.5817	22.8493	32.3166	36.5816	33.2283
CD24A	505.045	798.429	484.767	1766.42	1824.58	1538.29	2323.46	2066.07	2444.46	2210.97	2041.78	2228.59
F830002L21RIK	0.0206226	0	0.0457934	0.10657	0.141939	0.0812506	0.0916325	0.0363777	0.141518	0.058525	0	0.0455599
1700027J07RIK	0	0	0	0	0	0	0	0	0	0	0	0
4933404K13RIK	0.0454641	0	0	0.0469884	0.0894043	0.134342	0.0808042	0	0.0445696	0	0.044367	0
QRSL1	20.3862	15.0862	19.3764	8.08697	9.61686	7.82035	14.2647	12.5	11.882	13.7515	11.6596	12.4775
RTN4IP1	15.1579	10.4394	17.4063	6.3005	7.45193	5.79226	10.2153	7.95883	9.81533	12.3967	12.0835	11.8857
AIM1	148.743	111.439	153.709	78.8372	89.0217	79.609	71.6529	35.2586	75.7927	52.3607	53.4093	54.4789
SPEER5-PS1	0	0.026281	0	0	0.0732211	0.0244499	0.0220592	0	0	0	0	0
ATG5	49.2176	38.7752	51.1316	29.2191	29.9138	26.9919	34.502	25.7424	33.9509	36.9245	37.8095	36.4453
MIR1929	0.406243	0	0	0.419864	0	0	0	0	0	0	0.39644	0
PRDM1	2.19933	2.59748	2.31292	15.2589	15.8011	14.6706	10.5592	4.35331	10.574	1.68912	1.46626	1.44321
PREP	228.032	219.549	216.183	91.5797	104.652	96.3645	92.0418	57.5874	89.2084	75.0801	76.8431	75.5305
POPDC3	0	0	0	0	0	0	0	0	0	0	0.0597552	0
BVES	0.02351	0	0	0	0	0	0	0	0	0	0	0
LIN28B	2.25859	2.62074	1.88656	0.773287	0.818166	0.881591	0.683538	0.339202	0.623801	0.310891	0.382133	0.378477
HACE1	38.9385	35.7936	40.5726	24.5529	23.9373	24.53	24.7393	11.4712	25.98	16.7035	16.7152	18.4573
D030045P18RIK	0	0	0.0221706	0	0	0.0196685	0.0177453	0	0.0195758	0	0	0
SNORD14D	0	0	0	0	0	0	0	0	0	0	0	0
SNORD14C	0	0	0	0	0	0	0	0	0	0	0	0
C130030K03RIK	0	0	0.0387858	0.0180524	0	0.0172042	0.015522	0.0462164	0	0	0	0
GRIK2	0.0542825	0.172412	0.0774879	0.0641172	0.11437	0.114571	0.0413475	0.00683949	0.00760208	0	0.00756752	0.00856585
ASCC3	40.1757	29.8192	41.5709	20.388	23.8227	20.5798	24.8539	8.06199	26.3081	28.4977	30.7693	30.5922
SIM1	0.0154102	0.00543843	0.00570317	0.0212358	0.0101013	0.0151786	0.00912961	0.00453052	0.030214	0.0145775	0	0
LILR4B	0	0.0268996	0	0.183814	0.124907	0.0750762	0.0677353	0.0224089	0.0498149	0.048069	0	0
LILRB4A	0.0503742	0.0799993	0	0.0520632	0	0.223277	0.156679	0.0444293	0.222224	0.0238262	0.0491586	0.0278219
FAM162B	0	0	0	0	0	0	0	0	0	0	0	0
GPRC6A	0	0	0	0	0	0	0.0117556	0	0.0129683	0.0125138	0.0129093	0
RFX6	0	0	0	0	0	0	0	0	0.0200148	0	0	0
4933411G06RIK	0	0	0	0	0	0	0	0	0	0	0	0
VGLL2	0	0	0	0	0	0	0	0.0201952	0	0	0	0
ROS1	0	0	0	0	0	0	0.00453643	0	0.0100087	0	0	0
DCBLD1	16.3862	13.4478	17.2225	12.0176	11.9363	11.7236	11.9979	8.63618	12.1948	15.1227	13.3703	13.4235
GOPC	38.6908	34.3198	40.0035	39.4454	39.4364	40.1264	40.3014	18.9033	40.4091	33.8186	33.914	35.8166
NEPN	0	0.0438833	0.0230098	0.0642579	0.0203771	0.0612388	0	0	0	0	0	0.0686772
NUS1	65.5306	57.6761	65.9567	38.1419	38.025	37.487	44.6054	31.0832	45.2812	59.6739	57.5009	62.6988
ZFA-PS	0.276174	0.128654	0.196242	0.0685042	0.162928	0.0544046	0.117804	0.0194865	0.129956	0.0836007	0.183267	0.183039
SLC35F1	7.58955	6.22556	6.80697	2.00223	2.80119	2.17754	0.729139	0.288125	0.767112	0.0934266	0.207587	0.26854
CEP85L	4.36632	2.92825	4.00607	3.58406	4.29315	2.97315	3.1815	0.173359	4.2116	4.21009	4.65829	4.34232
GM19395	0	0	0	0	0	0	0	0	0	0	0	0
PLN	0	0.0645155	0	0	0	0	0	0	0	0	0	0.0336555
GM20597	0.00688674	0	0	0	0.00677132	0	0.00611997	0	0	0	0	0
MCM9	8.34042	7.6116	8.74027	6.67425	7.71148	6.60087	7.22975	4.25021	8.12852	8.73873	7.98685	8.39398
ASF1A	28.7943	24.0511	30.0856	15.0678	16.0541	13.6265	16.3408	12.5377	14.4619	16.6576	15.3424	16.2379
FAM184A	0	0	0	0	0	0	0	0	0	0.00904792	0	0.0105653
MAN1A	7.79122	8.10484	8.22973	8.45408	9.78118	8.74582	8.93526	2.14207	7.79032	30.7033	22.8476	24.1769
GM16998	0	0	0.0341031	0.0952375	0.211408	0.0605086	0.0818881	0	0	0	0	0.0678583
TBC1D32	7.07702	5.91236	7.26058	10.8042	11.8026	10.8364	8.06076	2.81711	8.65688	8.46704	9.3051	9.18365
MSL3L2	0	0	0	0.0182464	0	0	0	0	0	0	0.0172285	0
GJA1	166.478	149.564	160.222	349.867	377.672	371.564	268.215	129.779	274.208	438.16	491.076	434.035
4930467K11RIK	0.104511	0	0	0	0.102759	0	0	0.092177	0.256137	0.692047	0.356961	0.346331
HSF2	31.2702	25.0551	32.2877	17.581	19.1048	15.3363	24.0382	16.5149	25.5576	41.1758	37.0658	38.153
SERINC1	163.082	156.051	163.794	201.505	201.317	196.085	239.487	117.958	254.847	272.614	275.556	281.892
PKIB	0	0	0	0	0.00615126	0.00616208	0.0111191	0	0	0	0	0
FABP7	0	0	0	0	0	0.0488357	0	0	0	0	0	0
SMPDL3A	0	0	0	0	0	0	0	0	0	0	0	0
DUX	0.410456	0.197529	0.227859	0.115696	0.348544	0.147013	0.232117	0.0822765	0.0548701	0.247086	0.200276	0.103044
GM4981	0.0833549	0.0441254	0	0.0215374	0.040979	0	0.0370371	0	0.0612863	0.0591384	0.0406718	0.069056
GCC2	13.6187	13.282	13.2135	18.2613	21.9656	18.8321	16.6401	5.60911	17.4123	18.8165	20.5495	21.017
LIMS1	148.209	96.8459	150.791	74.5781	75.9415	73.4088	80.1403	32.3576	80.2513	77.8727	70.9174	73.4147
RANBP2	101.688	74.9508	102.025	54.8336	66.094	59.5067	62.1348	16.3269	67.9109	77.6752	87.9743	87.7684
CCDC138	5.89844	5.92046	6.19166	7.86965	8.0441	7.83189	4.38397	2.54036	3.96507	3.36233	3.45366	3.1985
EDAR	0	0.0108695	0.0797901	0.0424428	0.100944	0.101122	0.191592	0.0633842	0.080516	1.651	1.59298	1.31549
BB019430	0	0	0	0	0	0.056383	0.10174	0	0.0280586	0.0812256	0.0558621	0
SH3RF3	0.248342	0.159141	0.159631	0.520091	0.771095	0.521404	1.37061	0.587934	1.31338	3.12819	2.48089	1.5232
2018-09-10	42.2505	50.5044	39.987	59.1154	56.4071	60.1938	42.2649	18.4815	40.2191	21.4651	20.4766	20.5048
SOWAHC	7.27646	8.05844	6.90746	10.0647	10.7606	10.1692	8.7507	4.4385	8.53698	11.224	12.0118	12.7363
P4HA1	35.7715	46.8262	41.8119	109.715	98.7904	115.504	74.1571	56.9433	76.6031	56.8752	65.0838	61.2729
PLA2G12B	0	0	0	0	0	0	0	0	0	0	0	0
OIT3	0.0278208	0.0589096	0.046333	0.0431304	0	0.0685066	0.0494464	0.0245376	0.122731	0.065794	0.0271495	0.0460967
MCU	59.5255	38.0916	58.8745	18.3273	22.8162	19.0469	24.561	21.1279	24.6443	25.0499	25.8545	25.5454
MICU1	60.9165	60.6055	59.0715	62.581	63.1007	63.6971	68.9287	62.8995	68.4318	59.6858	61.8052	59.6133
DNAJB12	77.4141	72.1076	80.465	71.7776	74.0018	64.1469	66.3912	39.0134	71.5067	78.6103	81.0951	80.2663
DDIT4	499.511	678.973	544.935	942.537	792.84	1036.92	287.383	261.83	305.816	126.413	140.321	147.291
ANAPC16	113.825	88.3965	115.803	66.6362	70.0463	67.4254	57.7758	65.1647	56.0716	57.683	57.5922	57.4337
ASCC1	37.3018	33.2823	38.2784	68.9144	60.2175	68.2706	63.4674	82.5237	61.8463	48.0148	50.2801	47.604
SPOCK2	0.0386009	0.0817362	0.0642863	0.179528	0.180282	0.209114	0.231546	0.119159	0.113524	0.118675	0.0941736	0.0746181
MIR6906	0	0	0	0	0	0	0	0	0	0	0	0
CHST3	4.99456	5.45807	4.87275	3.66708	3.42788	3.40346	1.69189	0.905015	1.81793	0.304065	0.38003	0.484789
PSAP	401.431	433.659	413.912	1039.58	1007.11	981.788	1068.13	1126.63	1134.99	1280.96	1297.69	1346.25
CDH23	0.0100704	0.0390934	0.0186347	0.0485707	0.0660106	0.0859647	0.0238643	0.00592128	0.0197445	0.00635083	0.00327579	0.0111238
4632428N05RIK	3.82016	3.70612	4.10293	13.7464	13.7214	13.2157	2.72279	1.41649	2.20115	1.24638	1.24773	1.61902
GM17455	0.0440847	0.046674	0	0.31894	0.21673	0.303955	0.0391763	0	0.0432174	0	0.129063	0.0486964
SLC29A3	14.2254	17.1449	14.4252	23.488	26.1521	24.1457	22.906	8.96006	26.739	23.7489	25.0625	23.8849
UNC5B	90.4301	70.9726	92.2944	59.2133	54.2491	58.7463	37.2308	20.3783	42.8451	16.7457	18.5633	20.6068
MIR6408	0	0	0	0	0	0	0	0	0	0	0	0
PLDI	0	0	0	0	0	0	0	0	0	0	0	0
MIR466J	0	0	0	0	0	0	0	0	0	0	0	0
GM20611	0	0	0	0	0	0	0	0	0	0	0	0
PCBD1	0	0	0	0	0	0	0	0	0	0	0	0
SGPL1	69.9899	67.135	70.5251	99.2048	107.091	99.571	113.344	58.4974	111.687	103.204	97.3723	101.786
TBATA	0	0	0	0	0.0183626	0	0.0165962	0.0164716	0.0183081	0.0176665	0.0546747	0.0412584
ADAMTS14	0.801054	0.670773	0.945986	0.722542	0.701707	0.817706	0.931896	0.391797	0.749599	0.929993	0.781724	0.908984
PRF1	0	0	0	0.0380208	0	0.0181172	0	0	0	0	0	0
PALD1	8.77776	11.7173	8.33244	6.66016	6.7533	6.32983	10.4399	6.86867	9.81828	6.87358	6.35761	6.09296
NODAL	0	0	0	0.0559418	0	0.106627	0	0	0	0	0	0
EIF4EBP2	78.2055	93.9297	71.5632	89.398	92.9519	86.8437	84.1609	25.915	103.626	102.735	121.858	127.068
LRRC20	12.5551	14.1319	13.8756	14.883	14.5557	14.1695	16.1402	11.6964	17.2822	14.3312	14.3481	14.4895
NPFFR1	0.0578127	0	0	0	0	0	0	0	0	0.0273445	0	0
PPA1	129.893	146.345	112.626	19.1912	21.4202	18.2896	35.0813	31.594	30.1	43.208	43.0328	41.7974
1700022H01RIK	0.0552348	0.058479	0	0.114174	0	0.217619	0	0.0487164	0.0541482	0	0.107804	0
SAR1A	154.694	146.655	152.698	123.775	128.117	120.091	154.864	122.415	152.647	144.908	137.486	148.134
TYSND1	23.1543	21.1722	27.6526	19.8312	20.5075	20.2668	22.6324	28.8907	23.3306	22.8725	20.8053	22.6737
AIFM2	6.51653	7.91455	6.4608	19.7546	19.372	18.805	14.5259	11.8218	13.7488	17.0192	16.5682	16.9002
H2AFY2	6.03303	6.57586	6.03946	5.66289	5.75689	5.57217	5.08006	4.51853	5.00295	3.16227	2.83756	2.70936
MIR5108	0	0	0	0	0	0	0	0	0	0	0	0
COL13A1	0	0	0	0.0123411	0	0	0	0	0	0	0	0
2010107G23RIK	0.0873036	0.0693235	0	0	0.128761	0.128987	0.0581874	0.0385003	0.0213965	0.0825864	0.0425985	0.0241091
NEUROG3	0	0	0	0	0	0	0	0	0	0	0	0
TSPAN15	0.943206	1.05408	0.733051	0.82319	0.824355	0.918707	2.57045	2.23687	2.17806	6.61251	5.24654	5.19779
MIR7662	0	0	0	0	0	0	0	0	0.60717	0.58589	0	0
TACR2	0.0501957	0.0885731	0.0928848	0.0518787	0.0164515	0.0659217	0	0	0.0492082	0.0158278	0	0
HK1	107.921	130.165	112.965	207.127	200.46	214.949	191.616	143.331	206.724	360.357	390.096	384.416
HK1OS	1.08526	1.22081	1.20493	14.3711	9.87043	13.0278	9.584	15.2551	8.97673	5.83891	8.86973	5.69425
HKDC1	0	0	0	0.0336325	0	0.0320523	0.00963943	0.00956704	0.0319012	0	0.0211708	0.0239637
SUPV3L1	31.1414	31.7821	32.5219	22.8566	24.6666	24.6009	25.3281	18.9754	22.6408	26.6175	23.448	24.3762
4930507D05RIK	0.1722	0.164082	0.0382377	0.0177973	0.084657	0.15265	0.260146	0.227817	0.13505	0.0814478	0.134436	0.114128
VPS26A	89.3398	88.2034	86.899	108.485	115.212	101.282	111.088	66.2546	111.716	126.659	135.844	129.164
SRGN	0.0402779	0	0.0894388	0.0832567	0.27722	0.277707	0.250553	0.106574	0.118456	0.190508	0.393059	0.177965
KIF1BP	29.4206	32.4107	29.356	50.61	50.086	50.8364	47.5905	33.4703	50.0573	53.4065	49.9342	50.4441
DDX21	275.027	202.596	264.92	45.4853	53.7593	43.1521	83.9389	36.891	78.2915	92.9689	89.2535	93.4875
DDX50	77.0231	61.0924	79.811	75.9921	76.2805	73.2826	73.6435	57.8981	73.011	71.6639	72.7232	76.7238
STOX1	0	0	0	0.0125878	0.0479013	0	0.0108234	0	0.0358195	0	0	0.0269071
MIR7215	0	0	0	0	0	0	0	0	0	0	0	0
CCAR1	129.33	105.073	125.794	75.2783	85.3778	73.6943	65.8812	27.2574	66.3165	67.7594	71.7866	70.9123
SNORD98	6.74654	1.42856	2.9962	2.7891	5.30678	2.65806	4.7963	2.38014	6.61381	11.4876	1.31675	2.98092
TET1	2.20535	2.0423	2.11789	7.30925	8.29632	8.21577	4.35591	0.86606	5.27865	2.46434	2.80143	2.56348
SLC25A16	25.3435	23.1517	25.761	21.3822	22.4351	21.1477	29.0099	11.3301	28.7597	46.2984	43.184	46.7153
DNA2	9.87136	15.2449	8.34458	1.41147	1.97363	1.40834	1.19733	0.371861	1.18606	1.04044	0.626111	0.739082
RUFY2	5.38636	5.32224	5.11191	9.77932	10.6753	9.58221	7.10106	2.77435	7.25328	6.0672	6.24247	6.20202
HNRNPH3	19.0123	16.6604	19.5803	16.2097	15.7294	15.0533	13.9221	13.8637	13.3423	14.0781	17.5502	14.9376
PBLD2	0.324664	0.180912	0.455325	1.50114	1.4281	1.66624	1.04777	1.16047	0.988332	0.872873	0.900463	0.792754
PBLD1	1.61389	1.79103	1.48962	0.28135	0.55444	0.478806	0.276473	0.445894	0.285929	0.183939	0.151802	0.107393
ATOH7	0	0	0	0	0.1651	0	0	0	0	0	0	0
MYPN	0.0144036	0	0	0.0148865	0.0141622	0	0.0127999	0	0	0	0	0.00795517
HERC4	37.6031	33.6381	37.6826	35.6091	34.8045	33.6139	33.051	17.852	31.5317	30.294	29.6192	30.9771
SIRT1	31.0748	21.0433	32.6992	16.1882	18.0987	16.3508	18.1781	7.56776	17.9598	18.3541	17.7744	18.5396
DNAJC12	0.193747	0.322341	0.245842	0.915397	1.76893	1.0087	0.565718	0.414999	0.732607	0.733113	0.729276	0.458603
CTNNA3	0	0	0.0106898	0	0	0	0.0342244	0.00849184	0.0471934	0.072863	0.0563746	0.0319058
LRRTM3	0.00980806	0	0	0	0	0	0.0174321	0	0	0	0	0
1700023F02RIK	0.109509	0	0.48634	0.679085	0.323022	0.107863	0.194633	0.482928	0.322064	0.310776	0	0.24193
4930407I19RIK	0	0	0	0	0	0	0	0	0	0	0	0
GM31763	0	0	0	0.038095	0	0	0	0	0	0	0	0
REEP3	61.9602	65.1237	61.8092	62.1874	68.3447	62.1085	65.4726	24.31	70.738	66.1724	67.2676	70.4195
JMJD1C	53.7552	38.7523	55.4868	55.3655	63.1345	54.2407	46.4529	11.5046	55.3345	46.6804	50.7108	51.7101
NRBF2	44.3907	34.477	44.8073	52.9944	51.4957	50.7333	59.2849	49.657	56.3324	77.5516	78.0864	76.6774
EGR2	0.662595	1.2951	0.679071	2.96312	2.53079	2.93686	1.48338	1.14632	1.59891	4.33934	5.28476	5.26411
ADO	39.744	40.3686	38.4457	33.9699	33.5288	33.0855	26.7687	22.5045	27.9634	26.0266	25.3313	26.11
ZFP365	33.991	32.5015	31.8173	15.4282	16.7281	14.4585	10.6866	4.55565	10.4926	5.75086	5.92398	5.5781
RTKN2	8.26331	8.33156	7.29695	3.39629	2.96651	4.51437	0.52086	0.20339	0.376779	0.218144	0.0656365	0.0742955
ARID5B	14.5439	15.3003	15.681	32.3136	40.8176	34.7369	23.0701	2.43205	25.3014	16.1041	20.0015	20.8757
4930545H06RIK	0	0	0	0	0	0	0	0	0	0	0	0
1700040L02RIK	0	0.0969296	0.0338827	0	0.15003	0.0601176	0	0	0	0.0577371	0.0297811	0
TMEM26	0	0.00791758	0.00830301	0	0.0220591	0.0441957	0.0199371	0	0.00733122	0	0.0145958	0
RHOBTB1	2.70445	3.14011	2.41303	7.67605	6.37066	8.0397	3.55781	2.14028	3.31606	1.63084	1.84983	1.63357
CDK1	132.906	133.341	122.57	34.8696	30.7701	46.0606	13.9227	8.71498	10.2047	7.3353	4.92446	4.33379
ANK3	10.8622	10.2723	12.0364	16.4156	17.7202	16.313	17.7407	8.13949	20.5586	12.3992	12.729	12.4671
CCDC6	103.072	93.7535	103.721	106.642	111.746	104.893	85.4431	45.6507	87.8721	75.0908	78.3808	80.164
MRLN	0.16942	0	0	0	0.0832903	0	0	0.224139	0	0	0	0
SLC16A9	0	0	0	0.0438365	0.0417036	0.0313327	0.028269	0.0187045	0.031185	0.030092	0.0517387	0.0117128
FAM13C	3.70272	2.09685	3.80031	1.90231	2.04258	1.61149	2.60176	1.25313	2.25812	2.15861	1.62812	1.7359
PHYHIPL	0.615033	0.332223	0.822213	0.142698	0.234486	0.12363	0.145005	0.0332113	0.135352	0.130609	0.0979906	0.124783
D630013N20RIK	0	0	0	0	0	0	0	0	0	0	0	0
BICC1	0.731002	0.464362	0.243483	1.851	1.88073	1.90804	1.05021	0.161183	1.15854	2.00536	1.46239	1.70915
C730027H18RIK	0	0	0	0	0	0	0	0	0	0	0	0
1700113B09RIK	0	0	0	0	0.172779	0	0	0	0	0	0	0
TFAM	25.8814	24.2162	24.485	17.6401	16.8292	16.1274	17.9782	14.3562	17.0062	20.5058	19.479	19.78
UBE2D1	58.8227	67.4487	58.2741	66.8253	70.5309	62.0993	66.1394	45.2443	65.0418	54.5455	61.4998	56.927
CISD1	89.1466	76.6003	83.0242	56.73	52.7379	57.7666	63.1472	82.8388	54.3854	81.33	72.0951	79.2708
IPMK	23.9224	23.8949	23.8966	17.2134	18.3852	17.8542	13.9205	6.71115	13.5993	15.577	15.695	16.7794
1700049L16RIK	0	0	0	0	0	0	0	0	0	0	0	0
ZWINT	42.0483	46.9113	40.1123	38.9112	37.9449	38.5108	36.3037	29.9514	36.461	43.7176	46.0689	46.0215
A330049N07RIK	0	0.0201104	0.0421788	0	0	0	0	0	0	0	0.0556093	0
PCDH15	0.103981	0.0800643	0.0970808	0.11968	0.118504	0.109401	0.279312	0.116722	0.233988	0.178842	0.142983	0.174898
RSPH14	0	0	0	0	0	0	0	0	0	0	0	0
GNAZ	0.310313	0.476382	0.465118	2.05259	1.70863	1.63522	0.730772	0.725284	0.836572	0.352256	0.514803	0.291359
RAB36	0	0.015267	0.0640409	0.163939	0.198498	0.184644	0.102516	0.0508733	0.1555	0.109128	0.0562885	0.0318571
BCR	41.4969	37.1727	44.9242	39.7463	42.4949	38.1578	31.6584	19.7985	34.3574	27.4728	27.9633	30.6117
SPECC1L	48.7252	33.7928	51.1662	38.2832	39.3459	35.3342	41.1985	22.3596	42.7558	43.3945	42.338	45.2981
ADORA2A	0.0290174	0	0.0322172	0.0299903	0.0142655	0.0285812	0.0128933	0.0127965	0.113786	0.0686238	0.0141586	0.0480793
GM5779	0.37489	0.264606	0.184991	0.430511	0.614346	0.533369	0.259117	0.514342	0.08167	0.118212	0.325195	0.23006
UPB1	0.484367	0.236684	0.537779	2.37468	2.36904	1.90835	2.45018	2.62895	2.73945	3.8418	3.50267	3.34741
4933407G14RIK	0	0	0	0	0	0	0	0	0	0.0849587	0	0
GUCD1	16.3586	16.4947	16.3751	24.5287	24.4076	24.2842	22.7866	16.1686	21.9297	29.3652	27.6834	28.8545
SNRPD3	364.796	408.539	337.241	177.653	187.398	184.339	203.891	211.076	186.168	189.643	192.341	171.215
LRRC75B	9.46774	8.8067	9.45421	41.2964	43.4531	37.229	18.7099	10.6535	23.5941	11.2399	12.717	12.9888
GGT1	0.472047	0.267735	0.505383	3.903	3.38156	3.52035	3.83533	5.5611	4.74329	6.34727	6.89339	6.07091
GGT5	0.557075	0.319069	0.87199	5.19122	4.96557	5.06425	1.64746	1.83646	1.77264	1.21809	0.739696	0.827192
SUSD2	0.0696417	0.0614434	0.0257738	0.203934	0.194011	0.125757	0.299124	0.122846	0.307222	0.153717	0.158576	0.141033
CABIN1	42.2323	36.1123	43.3356	40.602	43.4516	39.9514	34.5147	19.3768	37.6083	31.3797	30.3897	30.5948
DDT	26.1797	36.5842	25.9671	90.5335	80.0897	90.7405	62.6276	94.9868	64.1008	60.8565	54.9705	54.7529
GSTT3	15.9352	17.1274	18.5211	72.8203	68.4442	69.4983	55.7119	56.61	60.0744	60.2015	57.0652	55.9037
GSTT1	2.00379	2.19863	3.64051	27.3746	24.8605	28.3133	12.0763	12.2106	10.0004	18.7485	17.9545	14.0048
GSTT4	0	0	0	0	0	0.15457	0.0348641	0.173011	0.0384604	0.0371124	0	0
GSTT2	0.248194	0.291968	0.367417	1.39659	1.11171	1.87422	0.416613	0.778324	0.59476	0.391306	0.349852	0.396005
MIF	945.948	1182.88	967.729	2294.84	2115.26	2266.22	1744.16	2921.39	1848.12	928.963	1025.74	943.132
DERL3	0	0	0	0.116908	0.16683	0.111415	0.100521	0.0498832	0	0	0	0
SMARCB1	154.543	150.681	156.902	149.921	147.29	149.682	119.546	142.981	117.259	75.8139	73.4932	69.2609
MMP11	7.84344	10.3845	8.21336	68.2135	57.0526	62.9429	38.8568	40.1379	39.6759	11.559	10.5225	10.2873
CHCHD10	20.3649	19.0294	19.6017	63.555	58.425	60.7259	30.8117	47.1007	32.31	110.649	119.435	104.156
GM867	0.030766	0	0	0.0635951	0	0.0303036	0	0	0.0301607	0	0	0
VPREB3	0	0.0664446	0	0.0648628	0	0.0618152	0	0	0.0615238	0	0	0.0693237
GM5134	0	0	0	0	0	0	0	0	0	0	0	0
MIR6409	0	0	0	0	0	0	0	0	0	0	0	0
ZFP280B	10.511	10.7508	9.89717	7.77102	8.95533	7.6655	7.63925	3.35681	7.19622	7.53062	6.96683	7.4578
SLC5A4B	0	0	0	0	0.0174238	0	0	0.0156295	0.0173721	0	0	0
SLC5A4A	0	0	0	0	0	0.0543252	0.0490133	0	0	0	0	0
PRMT2	20.247	21.1271	21.8505	30.8474	30.7142	32.5443	28.7822	27.3695	26.1955	21.736	19.7417	19.8041
MIR678	0	0	0	0	0	0	0	0	0	0	0	0
S100B	0.31844	0.457552	0.303047	4.4901	3.57832	3.31577	1.75855	3.29007	2.43051	3.52874	3.72907	3.41702
DIP2A	34.7843	34.1271	34.0987	44.608	45.8396	46.0256	36.501	13.3707	37.8416	25.4533	24.8945	26.642
PCNT	34.4109	30.8748	33.6411	15.7624	17.8955	18.1534	11.9253	5.66439	12.1372	11.7343	12.6391	12.9184
1700094J05RIK	0	0.04012	0.042073	0	0	0	0	0	0	0	0	0
2610028H24RIK	0	0	0	0	0	0	0	0	0	0.0405437	0.0209126	0.094686
YBEY	4.79568	4.43163	5.07406	5.54366	5.82432	4.88819	4.08354	4.38447	4.17714	3.58815	3.65265	3.39622
MCM3AP	25.9013	26.7959	26.8386	29.6878	31.1997	29.1791	28.4352	15.3585	29.9409	23.7403	22.6135	23.6942
LSS	29.0891	28.4719	29.1155	27.5596	27.6801	29.7279	17.8719	9.12946	17.439	24.0163	22.5385	24.0084
4930483K19RIK	0	0	0	0	0	0	0	0	0	0	0	0
SPATC1L	0	0	0.0315152	0.0586738	0.0837284	0.055917	0.151348	0.0500706	0	0	0	0
FTCD	0	0	0	0	0.0137076	0	0	0	0.0136669	0	0	0
COL6A2	22.8264	26.7844	28.3582	131.687	117.569	105.661	184.365	173.249	237.758	54.2654	57.2759	64.6529
COL6A1	169.044	197.161	197.348	740.398	712.099	656.362	1042.47	839.537	1270.82	457.887	478.258	538.885
PCBP3	20.5144	19.0159	21.928	19.9994	21.7078	21.6433	11.3149	11.9193	10.5748	8.1995	8.56038	8.15469
GM10787	0	0	0	0	0	0	0	0	0	0	0	0
SLC19A1	61.603	50.8615	59.9716	22.8729	19.9726	22.4989	20.4957	18.3341	21.1531	17.8248	17.6169	18.6139
COL18A1	34.7535	30.6335	37.608	22.6287	24.2026	25.2798	17.3755	10.8177	16.9741	14.645	15.8401	17.3749
GM10941	0.265687	0.33755	0.294984	0.823784	0.208987	0.994434	0.849978	0.609263	0.885562	0.351864	0.414841	0.352176
POFUT2	50.0904	44.5061	54.9146	46.4557	47.0412	45.581	52.4719	44.8848	55.2305	54.6961	52.4041	53.1675
ADARB1	9.77979	7.5983	11.712	20.651	20.7327	19.9276	10.3005	4.54642	10.0732	9.21365	8.87123	11.0419
GM17769	0.14735	0.249608	0.179959	1.18787	0.956214	1.00144	0.615438	0.506848	0.693367	0.153328	0.0862768	0.195318
FAM207A	40.846	39.769	38.4743	40.0606	40.4369	41.121	37.2385	38.2078	35.4814	31.4559	32.0857	29.7871
ITGB2	0.831649	0.391331	1.0113	2.06015	2.51803	2.41844	1.98254	1.37386	1.94116	0.749251	0.927521	0.904066
PTTG1IP	174.931	144.85	182.423	174.436	165.42	173.345	285.522	267.11	296.909	264.999	260.938	261.986
SUMO3	67.9136	84.532	66.5992	62.1897	62.393	58.7941	65.4909	63.6956	58.5859	46.835	45.1333	45.6327
UBE2G2	151.771	95.095	161.65	64.5799	62.8433	63.9677	118.678	113.483	117.092	81.5404	76.305	77.6332
MIR1930	0.449769	0	0	0	0	0	0.799384	1.58676	0	0	0.438916	0
TSPEAR	0.123567	0.196237	0.102895	0.159638	0.121496	0.167351	0.260797	0.204346	0.272556	0.321449	0.406976	0.238863
GM19402	0	0	0	0	0	0	0	0	0	0	0	0
GM10272	0	0	0	0	0	0	0	0.249915	0.0925934	0	0	0
GM10024	0	0	0	0	0	0	0	0	0	0	0	0
GM10142	0	0	0	0	0	0	0	0	0	0	0	0
KRTAP12-1	0	0	0	0	0	0	0	0	0	0	0	0
GM10100	0	0	0	0	0	0	0	0	0	0	0	0.114967
GM3238	0	0	0	0	0	0	0	0	0	0	0	0
GM19668	0	0	0	0	0	0	0	0	0	0	0	0
GM2696	0	0	0	0	0	0	0	0	0	0	0	0
KRTAP10-4	0	0	0	0	0	0.0412559	0	0	0	0	0	0
KRTAP10-10	0	0	0	0	0	0	0.0257273	0	0	0.0273864	0	0
GM10318	0	0	0	0	0	0	0	0	0	0	0	0
GM3285	0	0	0	0	0	0	0	0	0	0	0	0
1700009J07RIK	0	0	0	0.0427214	0	0	0	0	0	0	0	0
LRRC3	0.0351857	0.00931307	0	0.0181827	0	0.0259926	0.0234511	0.023275	0	0	0.0171683	0
TRPM2	0	0	0	0.0107097	0	0.0255162	0.018417	0	0.0203167	0	0	0
1810043G02RIK	10.3139	8.39615	10.2146	19.3856	18.5299	18.014	25.0618	34.6187	29.6998	33.1473	34.1734	34.7692
PFKL	75.9373	122.065	84.3111	257.816	210.083	268.399	212.428	248.422	224.625	223.503	237.511	232.276
AIRE	0	0.0197432	0.0207042	0.616741	0.348372	0.440823	0.0331433	0.0657887	0.109686	0.0352806	0	0
DNMT3L	0.0283001	0	0.0157104	0	0	0	0.0125746	0	0.0277433	0.0133855	0.0138086	0
ICOSL	0.0137484	0.0145559	0.0915869	0.142094	0.081108	0.0947924	0.0977413	0.0242518	0.0539117	0.0910389	0.0670833	0.0607465
D10JHU81E	31.5716	30.8141	29.2981	63.0832	55.8166	64.8698	50.8908	58.7963	50.9501	54.0416	53.8563	51.4695
PWP2	54.8898	38.894	50.8108	12.5686	11.6788	12.3338	17.2077	12.9896	16.5525	16.6925	15.6676	17.519
TRAPPC10	53.6804	48.3847	53.5243	58.5595	62.8644	55.4911	71.3326	37.4287	80.4078	113.003	113.799	126.422
AGPAT3	49.7663	52.4217	49.9971	63.2661	63.7092	61.9924	64.073	51.9742	66.9666	86.4643	87.0747	90.9773
MIR7659	0	0	0	0	0	0	0	0	0	0	0	0
RRP1	237.879	242.807	229.37	217.775	230.322	211.323	228.649	279.553	228.329	231.255	252.226	244.495
MIR6907	0.532122	1.69013	1.1816	0	1.04641	1.04825	0.472875	0.469324	0.521653	0.50337	0.519281	0.587786
CSTB	205.973	238.004	201.094	383.209	412.325	414.286	389.839	467.172	374.188	306.99	323.308	325.544
MIR6410	0	0	0	0	0	0	0	0	0	0	0	0
PDXK	25.6024	21.1698	25.453	36.5791	37.1912	35.1162	26.8646	15.4116	28.4724	43.3305	42.6519	44.6166
MIR6908	0	0	0	0	0	0	0.532923	0	0	0	0	1.32485
ILVBL	17.552	16.4361	17.6504	27.6467	27.0033	28.8083	27.6637	30.1171	28.7839	33.0692	31.2808	31.5191
SYDE1	18.7294	18.0899	16.8782	7.13731	7.19676	6.48507	10.9667	9.57703	10.7462	11.0979	10.0919	10.5221
OLFR1357	0	0	0	0	0	0	0	0	0.0638575	0	0	0
CASP14	0.0972474	0.120119	0.161957	0.0167513	0.0159363	0.0957858	0.0864199	0.0428855	0.0794452	0.0766608	0.0316336	0.0716136
CCDC105	0	0	0	0	0	0.0216605	0	0	0	0	0	0
SLC1A6	0	0	0	0	0	0	0	0	0	0	0.0352982	0.0199774
OLFR1356	0	0	0	0	0	0	0	0	0	0	0	0
OLFR1355	0	0	0	0	0	0	0	0	0	0	0	0
OLFR1354	0	0	0	0	0	0	0	0	0	0	0	0
OLFR8	0	0	0	0	0	0	0	0	0	0	0	0
OLFR1353	0	0	0	0	0	0	0	0	0	0	0	0
OLFR1352	0	0	0	0	0	0	0	0	0	0	0	0
OLFR1351	0	0	0	0	0	0	0	0	0	0	0	0
OLFR57	0	0	0	0	0	0	0	0	0	0	0	0
2610008E11RIK	11.5513	7.94507	13.7178	24.5143	26.4222	23.2657	23.7297	14.6005	23.7253	19.6824	19.7291	20.0424
VMN2R80	0	0	0	0	0	0	0	0	0	0	0	0
VMN2R81	0	0	0	0	0.0113393	0	0	0	0	0	0	0
VMN2R82	0	0	0	0	0	0	0	0	0	0	0	0
VMN2R83	0	0	0	0	0	0	0	0	0	0	0	0
PPAP2C	180.436	195.08	171.014	188.922	171.922	186.199	202.197	245.929	211.703	204.868	177.467	200.323
MIR6909	0	2.58062	0.676561	0	0.599153	2.40082	2.16607	3.76216	0.597376	1.15288	0	2.01933
MIER2	29.3456	28.2901	28.7013	26.6412	25.3885	27.0889	26.9563	24.5818	27.1781	24.5376	24.3347	26.0138
THEG	0	0	0	0	0	0	0	0	0	0	0	0
C2CD4C	0.061532	0.0177671	0.0621066	0.0867206	0.0550007	0.0606071	0.014913	0.0246683	0.0109675	0.0634989	0.0600472	0.0679688
SHC2	0.133669	0.0303257	0.127208	1.43085	0.957555	0.78996	0.466661	0.57263	0.804956	8.22807	11.8517	10.9895
ODF3L2	0	0	0	0.0938639	0	0	0	0	0	0.143186	0.324967	0.234078
MADCAM1	0	0	0	0.0549963	0	0	0	0	0.0521653	0.327191	0.0259641	0.088168
TPGS1	24.8096	24.5956	26.7454	40.3596	38.1259	39.7815	47.205	74.059	46.591	36.8429	34.0561	35.4407
CDC34	134.829	116.302	124.78	52.9576	60.1813	56.2307	61.0487	77.6724	58.6571	65.2962	74.4369	68.1702
GZMM	1.07637	1.02563	0.776792	0.556231	0.502708	0.318058	0.66957	0.759476	0.580357	1.24731	0.709019	1.45649
BC1	0	0	0	0	0	0	0	0	0	0	0	0
BSG	521.834	594.058	557.902	1253.15	1066.55	1278.42	843.761	1102.08	866.488	972.06	1085.34	1018.71
HCN2	1.18249	1.53989	0.919022	3.28756	2.92994	3.23792	1.67083	1.78343	1.56496	1.94636	2.53871	1.94623
POLRMT	26.0508	27.1662	26.5373	21.2155	22.6617	21.2376	22.2757	17.8213	23.2345	25.0517	23.1485	23.6952
FGF22	0	0	0	0	0	0	0	0	0	0	0	0
RNF126	117.445	123.245	127.504	80.9775	79.7345	88.9111	59.7124	72.2553	62.5725	55.9748	61.6807	58.7926
FSTL3	9.30491	8.13101	9.10673	13.8155	13.5428	16.3294	13.3059	14.332	14.3939	9.51584	10.2131	9.50902
PRSS57	0	0	0	0	0	0	0	0	0.0412596	0.0132712	0	0
PALM	41.2865	41.9913	40.855	68.7417	66.0696	71.197	43.4273	48.9963	44.9031	20.2626	18.6779	21.1262
MISP	0.0155668	0.0164811	0	0.0804437	0.0306119	0.245325	0.179837	0.0823782	0.106824	0	0.0303823	0.0343905
E130317F20RIK	0.956339	1.31292	0.98012	2.02025	1.85996	2.14271	3.81036	2.69727	4.33734	2.62453	1.78448	1.86898
PTBP1	458.06	512.479	452.413	333.574	353.558	348.313	273.757	187.174	283.238	242.551	243.48	240.944
LPPR3	3.47317	4.94966	4.33696	32.5441	31.6905	32.7385	16.7988	17.9354	17.7953	10.5002	9.46088	9.67421
MIR6910	0	0	0	0	0	0	0	0	0	0.541504	0.558621	0
PRTN3	0.155796	0.164947	0.259465	4.30729	3.98282	4.98728	1.3845	1.51151	1.29822	1.80539	0.760185	0.860471
ELANE	0	0	0	0.212214	0	0.0808973	0.291949	0	0	0.038847	0	0
CFD	0	0	0	0	0	0	0	0	0	0	0	0
MED16	31.2412	32.3552	32.2878	27.4472	29.0785	29.0371	33.282	28.7659	35.1498	36.5056	32.6986	32.4992
R3HDM4	92.242	102.778	93.5222	155.075	157.199	150.302	150.761	163.719	159.946	137.933	143.67	145.251
KISS1R	0.274812	0.316253	0.252052	1.96348	2.06767	2.30667	2.26164	0.906291	2.22552	1.94407	1.93556	2.11172
ARID3A	3.49859	4.10253	3.24215	5.84162	6.09189	5.92411	5.28292	3.17791	5.44526	3.40845	3.12172	3.24871
WDR18	56.543	52.2541	52.0146	21.295	22.6733	22.499	26.948	27.0389	26.2546	28.3833	26.31	24.695
GRIN3B	0.0230792	0.0244347	0.0256242	0	0.0340386	0.0113662	0	0.0305333	0.079188	0	0.0563057	0
TMEM259	111.149	112.334	120.727	104.179	101.834	99.7028	108.833	126.183	117.51	127.62	125.998	124.823
CNN2	53.2575	71.7165	48.985	158.49	149.215	152.38	141.117	128.968	123.001	83.1309	77.8552	69.0629
ABCA7	17.9106	18.5682	18.9696	27.9147	28.8662	28.8379	21.395	14.7912	23.3997	27.257	26.4748	29.2649
HMHA1	0.0186479	0.167817	0.134578	0.587831	0.440049	0.688785	0.0580007	0.0493416	0.109686	0.00882016	0.00909896	0.0514966
POLR2E	136.355	140.634	132.79	116.716	117.118	126.221	123.405	170.742	117.689	114.734	108.705	100.358
GPX4	197.252	196.739	204.074	364.816	340.648	388.017	485.205	712.122	462.484	627.534	693.781	615.029
SBNO2	30.9817	26.4222	35.0762	59.2527	59.1798	55.6106	55.6216	35.5195	61.4788	64.97	65.5219	70.9548
STK11	41.4038	37.9888	43.5472	42.5505	42.4816	43.7938	45.5185	58.6378	46.2036	49.1081	51.1166	51.4909
DOS	5.68889	6.53303	6.50723	6.42492	6.30402	6.99293	5.93204	5.49297	5.5095	6.58584	6.44703	5.23244
ATP5D	493.096	561.37	504.398	541.001	533.431	556.473	429.576	689.848	437.446	534.554	557.311	519.98
MIDN	34.8612	51.8697	35.3402	80.7873	84.0727	76.722	65.815	49.0755	71.9878	66.751	70.1668	70.3647
CIRBP	56.3701	60.0313	57.8438	39.6692	37.0883	37.9831	59.9844	72.2949	61.2473	72.2753	61.0569	66.3539
1600002K03RIK	10.4463	10.3225	9.72959	12.296	11.1842	10.2892	11.8103	17.5056	11.6631	12.0229	11.6667	10.898
EFNA2	1.87928	2.79678	2.24399	6.26664	7.47831	6.09444	4.14359	3.58082	3.94532	1.49263	1.48791	1.37086
MUM1	18.3059	23.2766	17.4581	21.3988	22.6163	21.6749	20.8743	20.4845	20.2674	13.4804	13.4799	13.3047
NDUFS7	93.5046	97.3606	93.7992	85.3582	84.4885	90.4791	87.8331	145.377	82.4301	98.0237	95.2367	90.0174
GAMT	1.48081	2.03388	1.91071	7.90048	8.02763	9.10609	9.53164	12.6369	10.1225	5.07316	4.02278	3.80193
DAZAP1	134.053	137.514	126.625	73.3754	77.7336	79.7264	60.7877	54.0823	59.3308	52.4348	55.2239	51.4004
MIR6911	0	1.15941	0.607925	0	0	0	0	0	0	0	0	0
RPS15	2255.76	2587.72	2137.04	2686.71	2596.13	2773.92	2493.43	4259.22	2322.35	1813.05	1899.03	1718.8
APC2	0.208181	0.246857	0.231137	1.65674	1.7931	1.52148	1.43561	0.793206	1.44492	0.468699	0.463198	0.459917
2310011J03RIK	46.1384	42.2902	42.3766	34.4577	33.117	36.495	40.1918	57.1435	38.935	42.676	39.7803	39.821
PCSK4	8.47585	6.71434	8.82651	3.54129	2.89614	3.43411	1.90975	1.6038	1.44378	1.37896	1.48121	1.56042
REEP6	48.5564	33.6108	53.453	20.7246	25.3546	22.9257	12.5736	10.6115	12.8418	11.0267	13.4967	12.0479
ADAMTSL5	8.50303	9.54192	8.2385	19.9132	19.6123	18.4861	21.0463	20.0175	21.7083	9.82102	11.6646	11.4211
PLK5	0	0	0	0	0.0703551	0.0880984	0.0158968	0	0	0.016922	0	0.0197599
MEX3D	32.5275	34.9536	33.4364	35.5597	34.4224	40.0683	27.8651	18.5122	28.8523	24.7038	24.7264	23.4795
MBD3	151.536	158.221	147.286	94.5408	104.954	93.2245	110.225	143.145	108.475	108.915	106.052	107.494
UQCR11	244.188	344.125	242.733	363.159	331.601	365.129	354.299	610.114	318.045	456.741	442.512	371.48
TCF3	126.837	149.488	128.253	110.383	114.574	113.957	94.7213	76.8933	107.52	56.8181	50.257	52.7926
ONECUT3	0.0161146	0.00853053	0.0268374	0.0166549	0.0554558	0.0158724	0	0	0.0157975	0	0.00786286	0
ATP8B3	0.128476	0.0634771	0.161663	0.911784	0.800048	0.936436	0.586082	0.2644	0.36945	0.575264	0.351053	0.283833
REXO1	31.5618	21.5506	33.1563	18.0842	19.3982	17.9861	17.673	10.3286	18.995	17.8799	16.8787	17.4993
KLF16	41.2709	38.7779	40.3018	13.6342	14.2175	14.6213	21.0408	21.5487	23.9793	15.9021	15.5706	16.177
ABHD17A	64.045	80.6781	62.0801	78.1478	68.5451	81.3224	67.6953	91.9579	72.1889	64.4908	54.6652	59.5819
ADAT3	7.97918	6.88867	7.01591	5.50704	4.00171	4.66808	4.30682	4.0147	3.8586	4.10331	2.92652	4.52525
SCAMP4	71.8922	68.9006	72.79	53.3705	51.7014	51.6064	59.7888	69.8431	59.6256	63.3668	59.0067	58.3611
MIR6912	0	0	0	0	0	0.531611	0	0	0	0	0	0
CSNK1G2	112.078	138.127	113.679	130.049	134.817	135.498	117.984	129.453	123.369	109.21	111.047	109.144
BTBD2	26.1818	25.9482	27.4886	63.7585	58.6307	62.5583	55.9643	65.2675	59.8766	42.6249	41.3649	38.7401
MKNK2	49.1981	79.4424	48.6743	132.68	135.295	139.688	142.125	113.515	141.672	150.99	165.91	159.052
MOB3A	12.6316	18.1336	13.1846	17.0823	17.9492	18.7681	20.5098	20.3935	20.7364	19.8477	17.7729	18.5094
IZUMO4	1.24861	1.06609	0.939107	7.16007	5.62361	7.45842	13.3867	15.0269	13.9384	11.2019	11.7918	10.8114
AP3D1	106.96	93.4537	111.616	112.957	123.348	115.485	101.475	73.1675	103.227	103.742	107.099	108.964
DOT1L	52.232	41.8612	54.0284	29.6113	31.8957	28.7951	32.1708	10.2822	34.2859	32.4629	33.1393	32.8937
PLEKHJ1	32.5333	32.2854	28.6969	28.3868	25.3546	27.6733	28.6179	41.8112	28.9244	30.7471	34.6159	31.4984
SF3A2	108.918	94.9573	105.368	55.5387	60.5366	53.3961	57.1803	55.1585	61.22	55.509	60.9858	54.6715
AMH	0.272293	0.384381	0.15116	0.328326	0.26773	0.447	0.30247	0.340225	0.400404	0.25758	0.177148	0.150389
JSRP1	0	0	0	0.0349887	0.133145	0	0.090253	0	0.13275	0	0	0
OAZ1	8.0833	10.0464	8.74054	8.39065	11.8872	8.30797	10.6188	17.6064	9.19904	12.5337	17.6285	11.6464
OAZ1-PS	0	0	0	0	0	0	0	0	0	0	0	0
MIR1982	1.0211	1.62161	0	0.527667	1.00399	1.00575	0	1.35089	0.500505	0	1.49469	0.563957
LINGO3	0.0219719	0.0348935	0.0121974	0.0454171	0.064811	0.0324624	0.00976276	0	0.0215396	0	0	0
LSM7	95.7432	118.375	92.8566	55.7343	54.61	58.6817	60.9787	99.61	51.7573	43.0704	38.287	42.0004
SPPL2B	32.421	26.5177	31.917	26.2403	26.4525	25.189	31.4209	28.3278	34.0811	34.942	29.1842	32.5251
TMPRSS9	0	0.0115807	0	0.0904398	0.0537746	0.0861906	0.0388814	0.135063	0.0643382	0.0517361	0.0426971	0.0483299
TIMM13	113.527	106.709	107.726	60.5314	57.1616	61.5758	65.5312	113.73	59.9249	73.9293	69.5544	68.1352
LMNB2	35.9202	37.4129	33.2986	7.88824	8.56232	9.32803	9.08324	6.15829	8.5699	11.2699	10.0403	10.1268
GADD45B	230.175	114.533	246.644	150.175	128.197	153.731	94.5167	100.256	99.7317	46.6926	40.8005	45.326
GNG7	0.508066	0.61802	0.828134	2.83778	3.20988	3.04517	2.15182	2.19286	2.63871	4.16191	4.66268	4.96734
DIRAS1	0.0517543	0.027397	0.129288	0.601758	0.50887	0.535252	0.11498	0.13694	0.177576	0.0122395	0.0757581	0.0428762
SLC39A3	11.404	9.40488	11.7407	21.7118	19.0995	19.4126	19.5995	18.8266	21.8458	18.8297	17.1991	18.1421
SGTA	150.89	161.416	155.184	171.331	170.856	176.431	144.505	179.857	147.845	147.087	149.672	144.318
THOP1	56.1667	70.8543	56.0967	31.54	34.9919	34.8375	27.223	27.9853	24.7584	24.0704	22.3068	21.9562
CREB3L3	0.231681	0.227768	0.25723	0.23945	0.455598	0.179299	0.102943	0.0729785	0.162231	0	0	0
MIR5615-1	0.629677	0	0	0	0	0	0	0	0	0	0	0
MIR5615-2	0	0	0	0	0	0	0	0	0	0	0	0
MAP2K2	94.1093	103.446	90.3986	84.4628	81.3081	84.1169	80.0091	110.975	83.4394	87.684	80.9626	84.4154
ZBTB7A	34.4195	36.9399	35.9823	50.8132	53.4224	46.9367	42.0286	21.0425	48.0183	40.5285	43.8887	44.9484
PIAS4	40.5893	41.1987	41.6199	58.0092	54.7636	58.6748	45.8927	36.9179	49.1833	36.2107	37.311	37.0542
EEF2	3965.15	3952	4021.4	4814.68	4652.18	4724.53	4494.93	3978.25	4675.79	3331.72	3300.02	3448.25
[truncated: 22,422 more rows]

## Sheet: 4. Zinc_Homeostasis_Genes_TPM
Gene	P day1#1	P day1#2	P day1#3		R day1#1	R day1#2	R day1#3	Avg	stdv		D day1#1	D day1#2	D day1#3	Avg	stdv		D day6#1	D day6#2	D day6#3	Avg	stdv
SLC30A1	44.1015	22.5466	46.6147		8.44409	9.95098	7.34294	8.57934	1.30927		12.762	6.64529	12.7754	10.7276	3.53537		25.8102	23.7287	21.6644	23.7344	2.07291
SLC30A2	0.0228075	0	0		0.0117861	0.0112126	0.0112324	0.0114104	0.000325552		0	0.0301739	0	0.010058	0.0174209		0.0323628	0	0	0.0107876	0.0186847
SLC30A3	0.0566426	0.0199898	0.0628887		0.0585418	0.0928223	0.0557913	0.0690518	0.0206317		0.050336	0.0666107	0	0.0389822	0.0347265		0.0357214	0.0368505	0	0.0241907	0.0209573
SLC30A4	93.0043	65.7637	98.1182		53.407	54.0001	53.0156	53.4742	0.495633		49.6201	17.3783	50.8537	39.284	18.981		66.4456	61.807	70.3185	66.1904	4.26152
SLC30A5	44.0913	40.2387	42.026		32.8691	30.966	31.3248	31.7199	1.01123		36.4996	26.6241	37.515	33.5462	6.01623		48.6567	43.526	47.9028	46.6952	2.77034
SLC30A6	23.3192	20.8197	24.4996		20.2341	20.2763	19.712	20.0741	0.314338		21.4342	14.2436	20.9668	18.8815	4.02338		19.8698	21.3809	22.7406	21.3305	1.4361
SLC30A7	17.8222	15.7072	18.1366		21.9609	23.7381	21.024	22.241	1.37859		22.683	9.8673	24.5629	19.0377	7.99726		23.1117	23.4253	26.3907	24.3092	1.80943
SLC30A8	0	0	0		0	0.0194898	0	0.00649659	0.0112524		0	0.0349654	0.019432	0.0181324	0.0175189		0	0	0.0656865	0.0218955	0.0379241
SLC30A9	61.3506	56.6632	64.6849		71.1919	66.3558	70.1926	69.2468	2.55304		62.0201	42.4853	62.0655	55.5236	11.2916		70.6194	68.0309	76.761	71.8038	4.48397
SLC30A10	0	0	0.00718883		0	0	0				0	0.0342643	0				0	0.0189558	0.0214565
SLC39A1	101.124	112.183	106.639		162.27	159.779	163.743	161.93	2.0037		134.683	126.095	136.172	132.317	5.4396		137.468	137	137.661	137.377	0.339925
SLC39A2	0.145684	0.0342756	0.107832		0.953599	1.05044	0.829076	0.944373	0.110971		0.374005	0.613901	0.507796	0.498567	0.120214		0.0306249	0.0631859	0.0715216	0.0551108	0.0216111
SLC39A3	11.404	9.40488	11.7407		21.7118	19.0995	19.4126	20.0746	1.42644		19.5995	18.8266	21.8458	20.0906	1.56838		18.8297	17.1991	18.1421	18.057	0.818616
SLC39A4	4.49769	3.97121	5.08789		14.998	16.0872	20.6125	17.2326	2.97732		8.53682	5.11955	6.0897	6.58202	1.76103		4.72028	4.19041	4.18078	4.36382	0.308739
SLC39A5	0	0.0186565	0		0	0.0173263	0.0173567	0.011561	0.0100121		0	0.015542	0	0.00518066	0.00897316		0	0	0	0	0
SLC39A6	48.3596	44.5127	48.0843		28.9083	31.205	27.6556	29.2563	1.80014		37.1547	24.3692	40.7392	34.0877	8.60517		35.2237	36.7075	36.9274	36.2862	0.926699
SLC39A7	75.1508	64.4206	76.6366		59.4604	59.6564	53.5254	57.5474	3.4845		77.3061	91.8896	79.8632	83.0196	7.78731		79.3642	75.8025	80.7625	78.6431	2.55746
SLC39A8	0.0192807	0	0.0107034		0.0199272	0.0473941	0.018991	0.0287708	0.0161351		0.111371	0	0.0756057	0.0623256	0.0568608		0.392138	0.37631	0.638931	0.469126	0.147268
SLC39A9	40.634	35.5714	42.9413		34.4707	34.8746	33.399	34.2481	0.762568		37.811	16.5017	40.5853	31.6327	13.177		44.4862	43.7493	47.9329	45.3895	2.2333
SLC39A10	16.5866	24.4061	14.4839		22.3297	23.9987	22.2106	22.8463	0.999765		23.4227	7.97955	23.8828	18.4283	9.05185		13.1402	13.2657	14.9989	13.8016	1.03881
SLC39A11	25.1733	20.7146	23.1304		24.992	27.5287	23.6549	25.3919	1.96759		41.2024	37.8427	41.022	40.0224	1.8898		50.0897	45.1383	48.5361	47.9214	2.53233
SLC39A12	0	0	0		0	0	0				0	0	0				0	0	0
SLC39A13	27.3816	29.8342	27.7446		46.1587	43.513	41.7103	43.794	2.23743		39.4385	33.6392	40.6399	37.9059	3.74354		23.3134	20.7998	21.7474	21.9535	1.26939
SLC39A14	76.4681	72.4878	75.356		70.2523	69.1879	65.2081	68.2161	2.65881		83.3358	41.1854	95.9145	73.4786	28.6652		201.411	224.173	240.573	222.052	19.6669
MTF1	8.87209	7.3856	9.00941		7.95684	8.51408	7.08072	7.85055	0.72257		8.01626	3.9562	7.887	6.61982	2.30767		8.87979	8.73047	9.23143	8.94723	0.257198
MTF2	29.1409	24.5199	26.2909		16.4178	17.9558	15.867	16.7469	1.08257		16.0424	7.65833	16.465	13.3886	4.96703		14.6716	15.0719	15.6957	15.1464	0.51612
MT4	0	0	0		0.399462	0.0950064	0.190347	0.228272	0.155731		0.171735	0.255668	0.852522	0.426641	0.371203		0.639834	0.094294	0.320201	0.351443	0.274108
MT3	0	0.0743488	0.077968		0.145158	0.138095	0.0691687	0.117474	0.0419821		0.312027	0.495494	0.0688426	0.292121	0.214021		1.39503	0.685297	1.24113	1.10715	0.373352
MT2	226.82	127.193	298.154		88.1375	83.9827	110.567	94.2292	14.301		59.0567	76.5927	57.621	64.4234	10.5633		331.295	321.078	270.213	307.529	32.718
MT1	737.977	732.908	853.718		1338.99	1202.77	1567.54	1369.77	184.32		1024.2	1742.33	1143.17	1303.23	384.897		3179.87	3382.97	2796.41	3119.75	297.865

## Sheet: 5. TopHat Mapping Sumary
YH_1_S1: P day1#1
163879797 + 0 in total (QC-passed reads + QC-failed reads)
163879797 + 0 mapped (100.00%:-nan%)
163879797 + 0 paired in sequencing
82544245 + 0 read1
81335552 + 0 read2
124590638 + 0 properly paired (76.03%:-nan%)
YH_2_S2: P day1#2
148888951 + 0 in total (QC-passed reads + QC-failed reads)
0 + 0 duplicates
148888951 + 0 mapped (100.00%:-nan%)
148888951 + 0 paired in sequencing
75038020 + 0 read1
73850931 + 0 read2
113872240 + 0 properly paired (76.48%:-nan%)
YH_3_S3: P day1#3
154816340 + 0 in total (QC-passed reads + QC-failed reads)
154816340 + 0 mapped (100.00%:-nan%)
154816340 + 0 paired in sequencing
77945052 + 0 read1
76871288 + 0 read2
115503480 + 0 properly paired (74.61%:-nan%)
YH_4_S4: R day1#1
156203323 + 0 in total (QC-passed reads + QC-failed reads)
156203323 + 0 mapped (100.00%:-nan%)
156203323 + 0 paired in sequencing
78818638 + 0 read1
77384685 + 0 read2
120625516 + 0 properly paired (77.22%:-nan%)
YH_5_S5: R day1#2
170958270 + 0 in total (QC-passed reads + QC-failed reads)
170958270 + 0 mapped (100.00%:-nan%)
170958270 + 0 paired in sequencing
86137252 + 0 read1
84821018 + 0 read2
134106190 + 0 properly paired (78.44%:-nan%)
YH_6_S6: R day1#3
163936403 + 0 in total (QC-passed reads + QC-failed reads)
163936403 + 0 mapped (100.00%:-nan%)
163936403 + 0 paired in sequencing
82728782 + 0 read1
81207621 + 0 read2
125734840 + 0 properly paired (76.70%:-nan%)
YH_7_S7: D day1#1
178858330 + 0 in total (QC-passed reads + QC-failed reads)
178858330 + 0 mapped (100.00%:-nan%)
178858330 + 0 paired in sequencing
90288844 + 0 read1
88569486 + 0 read2
140568386 + 0 properly paired (78.59%:-nan%)
YH_8_S8: D day1#2
151903522 + 0 in total (QC-passed reads + QC-failed reads)
151903522 + 0 mapped (100.00%:-nan%)
151903522 + 0 paired in sequencing
76508059 + 0 read1
75395463 + 0 read2
120286678 + 0 properly paired (79.19%:-nan%)
YH_9_S9: D day1#3
170108197 + 0 in total (QC-passed reads + QC-failed reads)
170108197 + 0 mapped (100.00%:-nan%)
170108197 + 0 paired in sequencing
85810142 + 0 read1
84298055 + 0 read2
133642328 + 0 properly paired (78.56%:-nan%)
YH_10_S10 : D day6#1
175242739 + 0 in total (QC-passed reads + QC-failed reads)
175242739 + 0 mapped (100.00%:-nan%)
175242739 + 0 paired in sequencing
88451030 + 0 read1
86791709 + 0 read2
140542242 + 0 properly paired (80.20%:-nan%)
YH_11_S11: D day6#2
168729853 + 0 in total (QC-passed reads + QC-failed reads)
168729853 + 0 mapped (100.00%:-nan%)
168729853 + 0 paired in sequencing
84996820 + 0 read1
83733033 + 0 read2
137565226 + 0 properly paired (81.53%:-nan%)
YH_12_S12: D day6#3
152219211 + 0 in total (QC-passed reads + QC-failed reads)
152219211 + 0 mapped (100.00%:-nan%)
152219211 + 0 paired in sequencing
76809644 + 0 read1
75409567 + 0 read2
123297356 + 0 properly paired (81.00%:-nan%)

## Sheet: 6. DE genes DESeq2 p<0.001
		baseMean	log2FoldChange	lfcSE	stat	pvalue	padj	Gene ID				baseMean	log2FoldChange	lfcSE	stat	pvalue	padj	Gene ID
Differentialy Expressed Genes at D day1 vs R day1		12.0033	7.04692	1.37562	5.12272	3.01167e-07	4.17224e-06	Cmtm5		Differentialy Expressed Genes at D day6 vs R day1		217.31	11.2603	1.187	9.48634	2.39299e-21	1.25557e-20	Esp15
with p < 0.001 (DESeq2)		54.5667	6.78776	0.915374	7.41529	1.21357e-13	4.31959e-12	Sult1a1		with p < 0.001 (DESeq2)		188.945	11.0584	1.18813	9.30741	1.30986e-20	6.64523e-20	Esp31
		24390.4	6.51538	0.396776	16.4208	1.35738e-60	1.50147e-57	Krt15				675.07	11.0411	1.10687	9.97504	1.96017e-23	1.12244e-22	Sftpd
		40.7779	6.36351	0.898555	7.08194	1.42154e-12	4.43422e-11	Slc22a8				323.911	10.8723	1.1888	9.14559	5.93075e-20	2.92701e-19	Klk1
		18.3114	5.77668	1.10047	5.24927	1.52707e-07	2.22485e-06	Mettl21e				144.045	10.6656	1.20219	8.87181	7.19647e-19	3.37753e-18	Klk1b1
		9.74288	5.76898	1.27399	4.52827	5.94676e-06	6.24193e-05	Angptl7				64697.9	10.1691	1.15665	8.79182	1.4715e-18	6.80311e-18	Apod
		109.668	5.55505	0.446719	12.4352	1.68273e-35	3.72271e-33	Itgbl1				323.786	9.97628	1.03069	9.67918	3.69677e-22	2.00629e-21	Csn3
		1761.85	5.28332	0.423139	12.486	8.90166e-36	2.06461e-33	Scrg1				482.876	9.96878	0.841737	11.8431	2.33622e-32	1.84572e-31	Csn1s2a
		6.38939	5.14691	1.31732	3.9071	9.3409e-05	0.0007324	Itln1				933.62	9.93357	0.972293	10.2166	1.67038e-24	9.97743e-24	Csn1s1
		58.5186	5.1373	0.808997	6.3502	2.15029e-10	4.8239e-09	Zbtb16				450.683	9.86932	0.840495	11.7423	7.73816e-32	6.0083e-31	Sult1a1
		55.4525	5.02836	0.653463	7.69495	1.41555e-14	5.73396e-13	Adamtsl2				910.076	9.67139	0.765513	12.6339	1.37351e-36	1.23249e-35	Pip
		62.1014	4.82551	0.731852	6.59356	4.29392e-11	1.08327e-09	Ucma				135.042	9.60921	1.20335	7.98539	1.4008e-15	5.6667e-15	Klk1b11
		7874.1	4.82101	0.243018	19.8381	1.39723e-87	3.34868e-84	Atp1b1				62.2495	9.45538	1.20417	7.85217	4.08907e-15	1.62054e-14	Esp34
		50868.9	4.77825	0.136721	34.949	1.34325e-267	1.93159e-263	Ctgf				12398.3	9.37418	0.964014	9.72411	2.37983e-22	1.30684e-21	Pigr
		64.8032	4.77502	0.506639	9.42491	4.30494e-21	3.55776e-19	Mro				112.819	9.34799	1.19696	7.80977	5.72931e-15	2.257e-14	Sult1d1
		8.47876	4.65767	1.20589	3.86245	0.000112257	0.000864623	Sftpd				47.2615	9.05897	1.22012	7.42464	1.13085e-13	4.18843e-13	Klk1b27
		102.47	4.64833	0.420938	11.0428	2.37548e-28	3.38212e-26	Ibsp				4568.08	8.9471	0.637071	14.0441	8.36919e-45	9.26891e-44	Dcn
		77.6825	4.45268	0.539226	8.25754	1.48705e-16	7.74775e-15	Ogn				1632.15	8.92931	0.544233	16.4071	1.70005e-60	2.58163e-59	Ogn
		63.07	4.4408	0.433296	10.2489	1.19706e-24	1.2751e-22	Islr				155.737	8.9195	1.04186	8.56113	1.11764e-17	4.9609e-17	Mettl21e
		25.6109	4.4268	0.645721	6.85559	7.10182e-12	2.04658e-10	Upk1b				41.8486	8.88214	1.21707	7.29794	2.92197e-13	1.0628e-12	Egfbp2
		592.796	4.35587	0.324499	13.4234	4.41207e-41	1.37925e-38	Capn6				13116.8	8.86866	0.583842	15.1902	4.10886e-52	5.34524e-51	Ltf
		33.8395	4.30366	0.687747	6.25762	3.90891e-10	8.47816e-09	Sohlh1				923.666	8.79351	0.647699	13.5765	5.5182e-42	5.73348e-41	Adcy8
		14542.6	4.3007	0.269935	15.9324	3.7785e-57	3.19616e-54	Tfcp2l1				37.3989	8.72018	1.24715	6.99208	2.7084e-12	9.39669e-12	Klk1b5
		56.0836	4.26834	0.439761	9.70605	2.84145e-22	2.63613e-20	Map7d2				2857.98	8.71482	0.73868	11.7978	4.00497e-32	3.13742e-31	Cxcl17
		186.296	4.22168	0.285493	14.7873	1.769e-49	8.77179e-47	Scnn1g				65.2734	8.56117	1.21185	7.06455	1.61137e-12	5.65771e-12	Angptl7
		41.4077	4.2207	0.619149	6.81694	9.29998e-12	2.63255e-10	Adcy8				822.89	8.51104	0.400443	21.254	3.02496e-100	8.47043e-99	Itgbl1
		22.0873	4.18609	0.772285	5.4204	5.94667e-08	9.27474e-07	Crip3				8841.48	8.5071	0.305505	27.846	1.20298e-170	7.27917e-169	Ccl28
		220.632	4.175	0.276262	15.1125	1.3406e-51	7.41455e-49	Omd				31.4245	8.4677	1.25215	6.76256	1.35579e-11	4.52589e-11	Klk1b16
		92.8456	4.11449	0.387433	10.6199	2.40885e-26	2.96062e-24	2310007B03Rik				31.1002	8.45661	1.2426	6.80557	1.0065e-11	3.3835e-11	Matn1
		2351.92	4.11294	0.356669	11.5315	9.14905e-31	1.47824e-28	Mgp				29.4078	8.37647	1.267	6.61124	3.81102e-11	1.23847e-10	Crisp1
		20.6972	4.08711	0.713111	5.73138	9.96195e-09	1.78175e-07	Bpifb3				1070.56	8.30676	0.326454	25.4454	7.93504e-143	3.45229e-141	Ccl6
		229.743	4.05391	0.494846	8.19226	2.56371e-16	1.2981e-14	Hapln1				53.947	8.28433	1.22155	6.78184	1.18654e-11	3.97604e-11	Klk1b21
		13.8195	4.00137	0.801995	4.98927	6.0608e-07	7.84467e-06	Kcnt1				696.794	8.27143	0.396696	20.8508	1.49947e-96	3.9667e-95	Mro
		43.5429	3.97293	0.455417	8.72372	2.69202e-18	1.6831e-16	Dpep1				51.1723	8.20518	1.21778	6.73782	1.6078e-11	5.3423e-11	Kcne3
		16.2664	3.96245	0.844033	4.69466	2.67055e-06	3.05267e-05	Cib3				4010.26	8.13506	0.398763	20.4007	1.64759e-92	4.15662e-91	Kcnj15
		131.269	3.93982	0.429793	9.1668	4.8727e-20	3.61182e-18	Best2				24.4007	8.1075	1.25245	6.4733	9.58855e-11	3.04019e-10	Epyc
		167.41	3.9324	0.525172	7.48784	7.00188e-14	2.56201e-12	Ptgds				23.0883	8.02583	1.24546	6.4441	1.16291e-10	3.66731e-10	Mlana
		23.2931	3.88527	0.712342	5.45423	4.91861e-08	7.78104e-07	Klk11				284.921	7.98077	0.573734	13.9102	5.49062e-44	5.96378e-43	Foxi1
		531.804	3.88425	0.326609	11.8927	1.29223e-32	2.32278e-30	Dlk2				31934.5	7.97468	0.225696	35.3338	1.78103e-273	2.06822e-271	Mgp
		17.7316	3.86512	0.721505	5.35702	8.46071e-08	1.28746e-06	Pip				42.2939	7.93149	1.22234	6.48879	8.6526e-11	2.75283e-10	Klk1b9
		29.4041	3.817	0.738007	5.17204	2.31556e-07	3.26769e-06	Gm4951				347.549	7.92795	1.02682	7.72087	1.15541e-14	4.49998e-14	Lum
		43.8324	3.80006	0.494139	7.69027	1.46828e-14	5.93086e-13	Rgr				42.1507	7.92559	1.22693	6.45969	1.04915e-10	3.3165e-10	Klk1b3
		210.886	3.76011	0.245711	15.303	7.30511e-53	4.37698e-50	Ace2				20.3982	7.84857	1.25881	6.23492	4.51997e-10	1.377e-09	Esp18
		276.597	3.69716	0.296804	12.4566	1.2882e-35	2.89443e-33	Clcnka				20.3549	7.84574	1.26536	6.2004	5.63183e-10	1.70553e-09	Csn1s2b
		20.5684	3.6919	0.635261	5.81162	6.18693e-09	1.14355e-07	Alas2				39.2016	7.82021	1.22072	6.40623	1.49162e-10	4.67497e-10	Pde6h
		28.4947	3.64966	0.5897	6.18901	6.0542e-10	1.26909e-08	Mug1				19.6491	7.7933	1.27376	6.11834	9.4553e-10	2.82336e-09	Crisp3
		2629.09	3.64414	0.147224	24.7523	2.92697e-135	2.10449e-131	Boc				174.085	7.75549	0.668884	11.5947	4.38475e-31	3.30699e-30	Kcnt1
		112.939	3.59667	0.32597	11.0337	2.62711e-28	3.70371e-26	Slc9a4				19.1467	7.75168	1.26911	6.10798	1.00901e-09	3.0078e-09	Mup5
		10.4916	3.57873	0.886612	4.03641	5.42755e-05	0.000451929	Serpina3f				307.613	7.73629	0.638105	12.1238	7.89652e-34	6.54988e-33	Igf2
		268.43	3.56731	0.199858	17.8492	2.93324e-71	6.0257e-68	Tnn				96.493	7.64086	0.861482	8.86943	7.3519e-19	3.4474e-18	Slc22a8
		70.8535	3.50866	0.407263	8.61522	6.98086e-18	4.23565e-16	Wfdc17				3305.94	7.63617	0.162483	46.9967	0	0	Ccl9
		513.734	3.48656	0.20429	17.0667	2.62617e-65	3.43312e-62	Fst				16.4163	7.53377	1.2742	5.91253	3.3689e-09	9.68245e-09	Cmtm5
		200.186	3.4737	0.397289	8.74351	2.25973e-18	1.43149e-16	Bgn				146.073	7.50064	0.667602	11.2352	2.7388e-29	1.93703e-28	Themis3
		19.7667	3.46979	0.593525	5.84607	5.03333e-09	9.43667e-08	Pgm5				15.9102	7.4858	1.27617	5.86583	4.46894e-09	1.27535e-08	Glycam1
		135.242	3.44246	0.32647	10.5445	5.38571e-26	6.5407e-24	4732456N10Rik				2276.64	7.46219	0.604424	12.346	5.12152e-35	4.38397e-34	Hapln1
		189.038	3.4067	0.241886	14.0839	4.7711e-45	2.07904e-42	Ntrk3				41031.6	7.26683	0.220574	32.945	4.98123e-238	4.82629e-236	Atp1b1
		9.36151	3.39557	0.832888	4.07687	4.56469e-05	0.000390716	Stx19				26.0231	7.22892	1.24275	5.81685	5.99652e-09	1.69688e-08	Itln1
		284.102	3.38169	0.209127	16.1706	8.13475e-59	7.31111e-56	Slc25a48				980.613	7.20998	0.245838	29.3282	4.53239e-189	3.28349e-187	Slc28a3
		1135.1	3.34584	0.23378	14.3119	1.84289e-46	8.54863e-44	Itga10				3976.43	7.18358	0.266874	26.9175	1.37074e-159	7.16822e-158	Capn6
		9.05774	3.33841	0.811546	4.11364	3.89472e-05	0.000342126	Themis3				12.803	7.17556	1.30018	5.51892	3.41098e-08	9.1912e-08	Cyp2d10
		68.736	3.32503	0.426049	7.80433	5.98193e-15	2.58319e-13	Endou				299.76	7.15711	0.420082	17.0374	4.33601e-65	7.20069e-64	Ucma
		7837.9	3.31164	0.262768	12.6029	2.03504e-36	4.8773e-34	H19				1382.71	7.13801	0.307246	23.2323	2.15029e-119	7.66579e-118	Cyp2f2
		14.1724	3.30198	0.774584	4.26291	2.01786e-05	0.000188483	Fabp6				198.098	7.09006	0.516544	13.726	7.0986e-43	7.51395e-42	Klrb1f
		308.098	3.29499	0.520761	6.32725	2.49567e-10	5.53824e-09	Ltf				11.9036	7.06796	1.31066	5.39267	6.94182e-08	1.82873e-07	Tmprss2
		1280.59	3.27654	0.229237	14.2932	2.41125e-46	1.08356e-43	Fbln7				215.329	7.05678	0.487376	14.4792	1.64112e-47	1.94727e-46	Zbtb16
		624.208	3.25069	0.216182	15.0369	4.21085e-51	2.24267e-48	Chrm1				22.0855	6.98942	1.25437	5.57205	2.51763e-08	6.85179e-08	Trim55
		15.3417	3.24723	0.77614	4.18382	2.8665e-05	0.0002599	BB123696				248.78	6.8913	0.624281	11.0388	2.48388e-28	1.71077e-27	Mug1
		148.585	3.21698	0.509197	6.31775	2.65401e-10	5.86247e-09	Kcnj15				460.039	6.88712	0.329036	20.9312	2.78581e-97	7.44437e-96	Iqgap2
		21.6783	3.21208	0.61993	5.18136	2.20271e-07	3.12376e-06	Ism1				10.0866	6.83124	1.34483	5.07961	3.78202e-07	9.46733e-07	Esp16
		287.398	3.1974	0.385501	8.29414	1.09374e-16	5.78236e-15	Lrrc26				19.553	6.80702	1.26864	5.36562	8.06728e-08	2.11533e-07	Mrgprb3
		11.4425	3.19114	0.748557	4.26306	2.01651e-05	0.000188483	Nalcn				1101.9	6.75433	0.211406	31.9496	5.47223e-224	4.91039e-222	Ptgds
		584.21	3.19051	0.308097	10.3555	3.9499e-25	4.43747e-23	Col9a2				74292.8	6.73467	0.167412	40.2283	0	0	Tfcp2l1
		13.1508	3.18378	0.742149	4.28994	1.78719e-05	0.000170084	Kndc1				434.249	6.68981	0.465881	14.3595	9.29228e-47	1.0759e-45	Serpina3n
		19.8217	3.17828	0.604519	5.25753	1.46002e-07	2.14455e-06	Ocm				182.497	6.67939	0.480775	13.893	6.98867e-44	7.5701e-43	Atp2a3
		24.706	3.17525	0.576092	5.5117	3.55377e-08	5.77437e-07	Scgb2b27				16.9603	6.60427	1.26637	5.21512	1.83702e-07	4.68769e-07	Wfdc15b
		166.982	3.15938	0.272753	11.5833	5.00698e-31	8.18186e-29	Ccl9				17311.7	6.57148	0.0793872	82.7776	0	0	Kit
		387.099	3.1137	0.326273	9.54323	1.38445e-21	1.19212e-19	Ifi44				6049.93	6.54644	0.0905	72.3363	0	0	Rhpn2
		1761.36	3.11069	0.311651	9.98133	1.83979e-23	1.81207e-21	Kit				8.24847	6.53965	1.3573	4.81813	1.44911e-06	3.48445e-06	Bpifa2
		43.8462	3.10507	0.444101	6.99181	2.71366e-12	8.14666e-11	Acta2				8.18585	6.52539	1.36834	4.76884	1.85286e-06	4.42429e-06	Col22a1
		148.276	3.103	0.324215	9.57082	1.06062e-21	9.29983e-20	Enpp2				44.1353	6.50634	0.898106	7.24451	4.34e-13	1.56416e-12	Kcnk3
		9226.45	3.09184	0.286791	10.7808	4.24153e-27	5.44582e-25	Hp				201.189	6.46714	0.412664	15.6717	2.36214e-55	3.29843e-54	Nrg2
		32.2384	3.0705	0.597069	5.14261	2.70945e-07	3.77537e-06	Ccl6				7.6353	6.42576	1.37685	4.667	3.05633e-06	7.1775e-06	A530053G22Rik
		21.5042	3.06529	0.534039	5.73982	9.47786e-09	1.70152e-07	Nrg2				7.41572	6.38525	1.37872	4.63129	3.63395e-06	8.48853e-06	Klk1b22
		482.234	3.05828	0.259072	11.8047	3.68944e-32	6.39207e-30	Card14				90.3731	6.31095	0.584456	10.798	3.51833e-27	2.33074e-26	Cd36
		55.9717	3.05063	0.443348	6.88089	5.94809e-12	1.721e-10	Orm2				113.47	6.29076	0.909388	6.91757	4.5945e-12	1.57331e-11	BB123696
		22.5202	3.02599	0.566309	5.34335	9.12442e-08	1.3826e-06	Krt23				6.83464	6.27471	1.44507	4.34216	1.41091e-05	3.14814e-05	Myl9
		209.189	3.01411	0.415999	7.24547	4.30951e-13	1.43784e-11	Slc1a1				728.72	6.27108	0.217092	28.8867	1.75341e-183	1.18848e-181	Scnn1g
		212.133	3.01309	0.24706	12.1958	3.27281e-34	6.62858e-32	Wisp2				19759.8	6.23111	0.34507	18.0575	6.88521e-73	1.32446e-71	Krt15
		796.311	3.00822	0.184387	16.3146	7.76553e-60	7.97631e-57	Rasd1				6.53824	6.20411	1.52076	4.07962	4.51084e-05	9.65832e-05	Cxcl15
		47541.5	3.00091	0.376124	7.97851	1.48105e-15	6.89239e-14	Cst3				6.52173	6.20106	1.40424	4.41596	1.00562e-05	2.26915e-05	Smr2
		406.463	2.97494	0.173166	17.1797	3.76725e-66	6.77163e-63	Usp18				47.4986	6.19153	0.782453	7.91297	2.5131e-15	1.00581e-14	Dcx
		1046.18	2.97457	0.24542	12.1203	8.24572e-34	1.62429e-31	Chadl				12.5833	6.1647	1.31659	4.68233	2.83628e-06	6.68259e-06	Erp27
		11.4767	2.96981	0.676202	4.3919	1.12367e-05	0.000110825	Stra6				67813.6	6.13261	0.249925	24.5378	5.844e-133	2.34846e-131	Hp
		3268.43	2.95082	0.335156	8.80432	1.31653e-18	8.60531e-17	Kitl				191.175	6.1116	0.390141	15.6651	2.62049e-55	3.65596e-54	Islr
		1916.05	2.94326	0.13179	22.333	1.76589e-110	6.34839e-107	St3gal4				55.2339	6.08298	0.700054	8.6893	3.64695e-18	1.65936e-17	Stx19
		107.754	2.93545	0.366564	8.00801	1.16577e-15	5.48043e-14	Sult5a1				44.0016	6.07872	0.788242	7.71175	1.24107e-14	4.82645e-14	Defb1
		9.90887	2.92956	0.744891	3.93288	8.39345e-05	0.00066647	Cytl1				116413	6.02517	0.0705652	85.3845	0	0	Ctgf
		56.1334	2.88245	0.33398	8.63062	6.10202e-18	3.73392e-16	Klf15				1267.58	5.96916	0.149044	40.0496	0	0	Vipr1
		27.3056	2.87278	0.64968	4.42184	9.78633e-06	9.78633e-05	8430426J06Rik				180.886	5.94739	0.394614	15.0714	2.49785e-51	3.1839e-50	Rgr
		1116.87	2.84727	0.370926	7.67611	1.63992e-14	6.56881e-13	Pdzk1ip1				5.33187	5.91618	1.54388	3.83202	0.000127094	0.000261558	Igf2os
		58.6113	2.84201	0.500377	5.67974	1.34897e-08	2.35416e-07	Wfdc21				46497.5	5.86937	0.181093	32.4108	1.9324e-230	1.77433e-228	Arg1
		38.6659	2.83937	0.43246	6.56562	5.1816e-11	1.29136e-09	Actg2				54769.3	5.85713	0.0796068	73.5758	0	0	Lbp
		407.493	2.83479	0.213238	13.294	2.50875e-40	7.21517e-38	Hs3st1				63.2536	5.78766	0.638096	9.07021	1.18782e-19	5.77921e-19	Upk1b
		77.5318	2.83296	0.497101	5.69896	1.20539e-08	2.13205e-07	Cnfn				17.9714	5.7801	1.14517	5.04736	4.4796e-07	1.11482e-06	Wap
		3463.31	2.81585	0.311817	9.03045	1.70964e-19	1.21106e-17	Scara5				4.86319	5.77499	1.49049	3.87457	0.000106815	0.000221481	2210407C18Rik
		15.8017	2.81215	0.646608	4.34908	1.36712e-05	0.000132833	Smim6				4.78544	5.75563	1.51728	3.79339	0.000148605	0.000304203	Rptn
		41645.7	2.78616	0.330028	8.44221	3.11402e-17	1.7492e-15	Wfdc18				2185.79	5.69305	0.258295	22.0409	1.16756e-107	3.60848e-106	Fst
		35.1596	2.73927	0.542995	5.04474	4.54145e-07	6.06933e-06	Gsdma				522.339	5.68663	0.374893	15.1687	5.7034e-52	7.37706e-51	Gjc3
		47192.7	2.72435	0.261723	10.4093	2.24877e-25	2.60785e-23	Col2a1				215.374	5.65063	0.754516	7.48908	6.9359e-14	2.60496e-13	Cited1
		28.2918	2.72151	0.569213	4.78118	1.7427e-06	2.05748e-05	Serpina3g				337.186	5.64909	0.263295	21.4554	4.0683e-102	1.17891e-100	Klf15
		13.4916	2.69637	0.635283	4.24436	2.19219e-05	0.000203247	Serpinb11				24.4801	5.64469	0.924441	6.10605	1.02125e-09	3.04369e-09	Ccdc3
		1884.51	2.66526	0.402364	6.624	3.4961e-11	8.94554e-10	Col27a1				4.35436	5.6239	1.5389	3.65449	0.000257698	0.000514452	Gucy1a3
		1458.37	2.66324	0.332892	8.0003	1.24119e-15	5.81377e-14	Serpina3h				72.3264	5.61699	0.536819	10.4635	1.27105e-25	7.9374e-25	Alas2
		477.198	2.66279	0.205117	12.9818	1.5517e-38	3.98453e-36	Mest				4.2723	5.59193	1.51035	3.70242	0.000213555	0.000429969	Slc5a11
		106.423	2.65613	0.344898	7.70121	1.34784e-14	5.49065e-13	Ccdc37				3292.72	5.58833	0.101401	55.1113	0	0	Acss1
		29.7503	2.65042	0.470463	5.63364	1.76444e-08	3.00624e-07	Ly6g6e				8.35073	5.57031	1.35057	4.12441	3.71687e-05	8.01483e-05	Cyp4b1
		144.313	2.64234	0.310332	8.51454	1.67248e-17	9.97935e-16	Oas1g				4.17365	5.56334	1.5634	3.55849	0.000372997	0.000731133	Scgb3a2
		3223.24	2.63063	0.165176	15.9262	4.16845e-57	3.33013e-54	Fkbp5				4.13193	5.54201	1.53214	3.61718	0.00029783	0.000590295	Scnn1b
		4096.36	2.62694	0.192013	13.681	1.31796e-42	4.4075e-40	Fam180a				99.2403	5.54067	0.448155	12.3633	4.12976e-35	3.54657e-34	Ism1
		1418.88	2.6182	0.295406	8.86305	7.78519e-19	5.23136e-17	Papss2				174.713	5.5331	0.35972	15.3817	2.17209e-53	2.90218e-52	Stc1
		375075	2.60067	0.276263	9.41374	4.78811e-21	3.93446e-19	Ctsd				8.06715	5.51373	1.43465	3.84326	0.000121412	0.000250321	Klk1b4
		31.045	2.59817	0.519462	5.00166	5.68383e-07	7.40339e-06	Hsf2bp				74.3494	5.49675	0.512473	10.7259	7.69079e-27	5.02527e-26	Adamtsl2
		22.6447	2.57073	0.506498	5.07549	3.86498e-07	5.2482e-06	Prss27				4.00257	5.49337	1.53823	3.57123	0.000355303	0.000698356	Gjb1
		281.715	2.56246	0.192007	13.3457	1.25486e-40	3.75936e-38	Plscr2				7.86771	5.48102	1.38112	3.96854	7.23132e-05	0.000152313	Klk1b8
		72.8856	2.55893	0.295718	8.65329	5.00358e-18	3.08805e-16	Oas2				3.95673	5.47962	1.53515	3.56943	0.000357761	0.000702838	2310057J18Rik
		67.8391	2.55299	0.395663	6.45242	1.10079e-10	2.5865e-09	Cyp2f2				72.4524	5.4606	0.513365	10.6369	2.00763e-26	1.29467e-25	Pgm5
		100.964	2.53772	0.369005	6.87719	6.10453e-12	1.76271e-10	Cyp17a1				389.678	5.42913	0.232587	23.3424	1.64545e-120	5.90604e-119	Mlph
		37.6128	2.52026	0.395389	6.37413	1.8401e-10	4.14743e-09	Kirrel3				98.3749	5.40955	0.495154	10.925	8.7543e-28	5.94908e-27	Zfp385b
		43.2877	2.49919	0.353531	7.06922	1.55802e-12	4.84943e-11	Gm15663				1662.71	5.33664	0.12014	44.4203	0	0	Plscr2
		398.135	2.49366	0.151764	16.4312	1.14375e-60	1.37059e-57	Arl14epl				469.256	5.32807	0.202494	26.3122	1.39189e-152	6.6815e-151	Omd
		31.4153	2.491	0.426277	5.84362	5.10783e-09	9.55144e-08	Grip2				58.9257	5.31429	0.544632	9.75759	1.71173e-22	9.47543e-22	Htr3a
		62.159	2.4896	0.486229	5.12022	3.05185e-07	4.22383e-06	Dcn				44.7982	5.27964	0.614944	8.58557	9.03843e-18	4.02663e-17	Cytl1
		2532.24	2.46991	0.408234	6.05024	1.44633e-09	2.86082e-08	Mia				806.423	5.25627	0.201075	26.1409	1.25098e-150	5.87996e-149	Tnn
		192.071	2.46942	0.302934	8.15168	3.58888e-16	1.80448e-14	Tmem125				12.468	5.24897	1.16071	4.5222	6.12014e-06	1.40365e-05	9130230L23Rik
		678.229	2.4538	0.206948	11.8571	1.97787e-32	3.4685e-30	Atp6v1b1				18.8085	5.24759	0.945235	5.55162	2.83037e-08	7.67251e-08	Bpifb1
		60.993	2.4445	0.312562	7.82086	5.24647e-15	2.28619e-13	Ctnnd2				6.65702	5.23362	1.39002	3.76513	0.000166461	0.000338734	Zim1
		58.6728	2.44368	0.336748	7.2567	3.96663e-13	1.33062e-11	Myom2				17282.4	5.22309	0.0974605	53.5918	0	0	Prss23
		42.5584	2.43487	0.521976	4.66472	3.09034e-06	3.46639e-05	Slc28a3				12.3868	5.22207	1.16626	4.47761	7.54834e-06	1.72022e-05	Klk1b24
		115.916	2.42117	0.369864	6.54611	5.90555e-11	1.44918e-09	Mx2				17.6894	5.16597	0.963827	5.35986	8.32872e-08	2.18208e-07	A330023F24Rik
		13180.4	2.41476	0.303781	7.94902	1.87994e-15	8.58206e-14	Lcn2				1575.41	5.14147	0.263331	19.5247	6.76789e-85	1.56037e-83	Scrg1
		18.6298	2.41253	0.597634	4.03681	5.41831e-05	0.000451683	Hrct1				23.1392	5.12405	0.850081	6.02772	1.66291e-09	4.88058e-09	5430416O09Rik
		26.482	2.40339	0.502259	4.78515	1.70857e-06	2.02383e-05	Serpina3n				57.2858	5.12019	0.528757	9.68345	3.54545e-22	1.92682e-21	Sohlh1
		162.849	2.38008	0.235181	10.1202	4.4949e-24	4.61691e-22	Sybu				314.232	5.11078	0.248594	20.5587	6.43282e-94	1.64125e-92	Ncald
		15423.7	2.37613	0.333992	7.11434	1.12447e-12	3.56165e-11	Wfdc3				28.3276	5.10158	0.748751	6.81345	9.52881e-12	3.20871e-11	Slc13a2
		393.12	2.36836	0.352779	6.71346	1.90066e-11	5.06139e-10	Tmtc2				33.8518	5.09184	0.692442	7.35346	1.9314e-13	7.07224e-13	Gm8439
		241334	2.36823	0.177259	13.3603	1.03199e-40	3.15744e-38	Spp1				6.03655	5.08714	1.40966	3.60876	0.000307668	0.000608744	Clec3a
		4376.2	2.36813	0.269611	8.78351	1.58452e-18	1.03102e-16	Ggact				407.057	5.07626	0.210373	24.1298	1.21751e-128	4.75946e-127	0610040J01Rik
		440.605	2.36678	0.261603	9.04723	1.46644e-19	1.04913e-17	Apol9b				5.87528	5.04646	1.41675	3.56201	0.000368031	0.000721848	Srpx2
		6706.45	2.36239	0.109745	21.5262	8.85057e-103	2.54542e-99	Mmp15				80.7119	5.0229	0.432459	11.6147	3.46858e-31	2.62479e-30	Krt23
		285.693	2.3601	0.310407	7.60327	2.88747e-14	1.11021e-12	Grin1os				1.46002e+06	4.99636	0.163585	30.5428	7.03944e-205	5.7603e-203	Igfbp5
		94.1754	2.35812	0.397243	5.93621	2.91688e-09	5.6001e-08	Slc9a2				5.67546	4.9949	1.42237	3.51168	0.00044529	0.000866495	Dcpp2
		171.688	2.34295	0.443219	5.28622	1.24872e-07	1.85119e-06	Olfm4				753.294	4.99017	0.165841	30.09	6.542e-199	5.19185e-197	Wisp2
		511.956	2.32242	0.174218	13.3306	1.5372e-40	4.51122e-38	Fjx1				800.195	4.98615	0.184329	27.0503	3.79022e-161	2.02226e-159	Slc25a48
		2230.59	2.31921	0.185231	12.5206	5.75643e-36	1.35701e-33	Kank4				67.0885	4.95991	0.47474	10.4476	1.50235e-25	9.35591e-25	Hhipl2
		567.717	2.31376	0.347348	6.66121	2.71574e-11	7.08755e-10	Orm1				65759.5	4.95888	0.169613	29.2364	6.68803e-188	4.73651e-186	Lcn2
		60.2848	2.30921	0.389545	5.92798	3.06687e-09	5.86457e-08	Gjc3				3201.99	4.9549	0.113579	43.6253	0	0	Itga10
		67.7068	2.30269	0.326625	7.04997	1.78958e-12	5.51051e-11	Bpifb4				881.829	4.94155	0.147922	33.4065	1.10409e-244	1.11063e-242	Lrrc26
		30.1543	2.29913	0.496289	4.63265	3.6101e-06	3.98719e-05	Htra3				15.1823	4.94019	1.01147	4.88415	1.03875e-06	2.52695e-06	4930480G23Rik
		941.037	2.28619	0.30479	7.50088	6.33926e-14	2.33142e-12	Prr15l				505.349	4.92899	0.184297	26.7448	1.42033e-157	7.28287e-156	Ntrk3
		7630.38	2.28303	0.140355	16.2661	1.71696e-59	1.64599e-56	Lgals3bp				14.9822	4.90654	0.982265	4.99513	5.87957e-07	1.45474e-06	A630077J23Rik
		140.84	2.25736	0.464491	4.85985	1.17476e-06	1.43161e-05	Serpina3i				34.2911	4.88167	0.670933	7.27594	3.44009e-13	1.24723e-12	Bpifb3
		17.9436	2.25163	0.569529	3.95349	7.70206e-05	0.000619762	Psca				329.495	4.861	0.461865	10.5247	6.64441e-26	4.20245e-25	Gpd1
		374.031	2.24925	0.190932	11.7804	4.92731e-32	8.43509e-30	Rhpn2				600.384	4.84513	0.17424	27.8073	3.54369e-170	2.12797e-168	Atp10b
		273.451	2.23077	0.179647	12.4175	2.10052e-35	4.57659e-33	Edn1				322.752	4.83832	0.220675	21.9251	1.49724e-106	4.56485e-105	C1s2
		109.367	2.20141	0.398431	5.52519	3.29132e-08	5.37832e-07	Napsa				52.1876	4.83536	0.512568	9.43361	3.9623e-21	2.05439e-20	Col10a1
		52.219	2.19624	0.354848	6.18923	6.04601e-10	1.26909e-08	Rnf223				9.1939	4.79066	1.20593	3.97259	7.10941e-05	0.000149825	E130215H24Rik
		209.504	2.18143	0.225984	9.653	4.77365e-22	4.3723e-20	Wif1				1802.74	4.7906	0.115653	41.4223	0	0	Tmtc2
		5942.51	2.18085	0.260611	8.36822	5.84951e-17	3.22283e-15	Ldlrad3				18.3835	4.77958	0.885434	5.39801	6.73846e-08	1.77664e-07	Cyp2b10
		118.736	2.1807	0.332529	6.55791	5.45666e-11	1.35521e-09	Dapk1				31.6643	4.76302	0.656248	7.25795	3.92989e-13	1.42025e-12	Acss3
		16892.8	2.17793	0.167106	13.0332	7.92238e-39	2.1097e-36	Itm2a				237.631	4.75182	0.247632	19.189	4.57178e-82	1.00841e-80	Slc9a4
		27.703	2.1692	0.415718	5.21797	1.80899e-07	2.59873e-06	Pinc				19694	4.74889	0.207813	22.8517	1.40582e-115	4.82655e-114	H19
		49.3615	2.16885	0.440941	4.91869	8.71261e-07	1.0904e-05	Nog				8.96192	4.74296	1.21616	3.89995	9.62111e-05	0.000200351	Art4
		199.081	2.15262	0.347506	6.19449	5.84753e-10	1.22935e-08	Asprv1				61.9074	4.73345	0.471823	10.0323	1.0998e-23	6.36698e-23	Kcnq1
		334.711	2.13784	0.269484	7.93307	2.13798e-15	9.66796e-14	Col3a1				1306.96	4.71755	0.270687	17.4281	5.05381e-68	8.86831e-67	Slc34a2
		54.6502	2.12939	0.389475	5.46733	4.56866e-08	7.2674e-07	Gm10638				5095.37	4.67697	0.0856975	54.5753	0	0	Boc
		4728.7	2.12814	0.368331	5.77779	7.5686e-09	1.37768e-07	Il17b				122.106	4.65617	0.322133	14.4542	2.35875e-47	2.78206e-46	Dhrs9
		380.901	2.12535	0.29173	7.28534	3.20857e-13	1.09076e-11	Oas1a				145.4	4.64121	0.320667	14.4736	1.77918e-47	2.10792e-46	Ddr2
		1909	2.1074	0.320912	6.56691	5.13691e-11	1.28244e-09	Itpr1				49.3814	4.62512	0.542617	8.52373	1.5449e-17	6.80196e-17	Gm4951
		2703.03	2.10498	0.391641	5.37478	7.66782e-08	1.17803e-06	Slc4a4				64.3709	4.59158	0.436508	10.5189	7.07086e-26	4.46859e-25	Dpep1
		68.7262	2.10137	0.370327	5.67437	1.39201e-08	2.42045e-07	Gdf5				12445.7	4.5728	0.0823774	55.5103	0	0	Slc4a4
		105.913	2.08228	0.274931	7.57383	3.62375e-14	1.3677e-12	Vipr1				71.5222	4.56978	0.416654	10.9678	5.45774e-28	3.72328e-27	Hrct1
		216.867	2.07102	0.245039	8.45179	2.86878e-17	1.62413e-15	Fam107a				8890.98	4.55962	0.0996742	45.7453	0	0	Rap1gap2
		3826.7	2.05814	0.528689	3.89292	9.90463e-05	0.000771971	Cxcl5				15.8357	4.5527	0.906271	5.02355	5.07247e-07	1.26018e-06	Atp6v0d2
		27561.8	2.04058	0.351574	5.80414	6.46969e-09	1.19428e-07	Cited4				2486.57	4.53225	0.0966573	46.8899	0	0	Atp6v1b1
		6829.02	2.03313	0.157907	12.8755	6.18672e-38	1.56079e-35	Tsc22d3				517.318	4.52738	0.166754	27.15	2.53113e-162	1.37842e-160	Tspan33
		28.8227	2.03202	0.454659	4.46933	7.84649e-06	8.00799e-05	Ddr2				15.4432	4.52691	0.906425	4.99425	5.90648e-07	1.46094e-06	Cyp3a57
		335.731	2.03117	0.291885	6.95881	3.43159e-12	1.01745e-10	Vax2os				15.2649	4.51062	0.890366	5.06603	4.06188e-07	1.01454e-06	Bcat1
		148.094	2.02573	0.365692	5.53945	3.03419e-08	4.98648e-07	Mrgprf				6782	4.51055	0.0890933	50.6272	0	0	Prelp
		375.112	2.02178	0.169402	11.9348	7.79689e-33	1.41923e-30	Cish				144.596	4.50797	0.298749	15.0895	1.89911e-51	2.42856e-50	Stxbp6
		22265	2.01266	0.270307	7.44583	9.63333e-14	3.47186e-12	Cryab				10262.6	4.4769	0.095728	46.7669	0	0	Fkbp5
		23.7506	2.00905	0.505226	3.97654	6.99245e-05	0.00056873	Asb4				526.007	4.47331	0.176039	25.4109	1.91006e-142	8.26453e-141	Slc1a1
		6513.48	2.00047	0.153662	13.0187	9.58332e-39	2.5056e-36	Cadm1				8545.64	4.47169	0.0752837	59.3978	0	0	Kitl
		55.3535	2.00018	0.296693	6.74159	1.5666e-11	4.2505e-10	C1s2				1051.24	4.47061	0.373014	11.9851	4.25304e-33	3.43572e-32	Setbp1
		97.1337	1.99053	0.414489	4.80236	1.56807e-06	1.86818e-05	Ifi27l2a				591.593	4.45151	0.168895	26.3567	4.30292e-153	2.1039e-151	Sybu
		982.76	1.97504	0.251972	7.83832	4.56619e-15	2.00801e-13	Isg15				1396.33	4.45134	0.261644	17.013	6.58017e-65	1.09046e-63	Col3a1
		997.492	1.95934	0.350891	5.58391	2.35167e-08	3.93221e-07	Wfdc12				9413.01	4.40597	0.0981486	44.8908	0	0	Scara5
		9499.75	1.93534	0.284418	6.80457	1.01353e-11	2.85217e-10	Lect1				366.375	4.34724	0.186749	23.2785	7.32589e-120	2.62353e-118	Plce1
		935.348	1.93034	0.294532	6.55395	5.60359e-11	1.3878e-09	Apol9a				27.3917	4.34632	0.62725	6.92916	4.23336e-12	1.45311e-11	Stra6
		454.705	1.92914	0.292567	6.59384	4.286e-11	1.08318e-09	Upk3bl				458.789	4.34439	0.194021	22.3913	4.78329e-111	1.5323e-109	Lrg1
		7961.15	1.9271	0.253659	7.59722	3.02566e-14	1.15715e-12	Col11a2				225.492	4.33928	0.238408	18.2011	5.05795e-74	9.93534e-73	Gm7694
		686.242	1.91386	0.191906	9.97286	2.00367e-23	1.96005e-21	Pde9a				48058.3	4.31904	0.0619288	69.7421	0	0	Enpp3
		19.4695	1.91226	0.469833	4.07007	4.6998e-05	0.000399192	Hapln2				826.158	4.31581	0.336424	12.8285	1.13574e-37	1.04649e-36	Ifi44
		39.0196	1.90737	0.483691	3.94336	8.03488e-05	0.000643686	Vnn3				36.9415	4.31392	0.545503	7.90815	2.61234e-15	1.04421e-14	Fmo2
		23.825	1.90163	0.465258	4.08726	4.3649e-05	0.000377207	Alpk3				1034.34	4.28813	0.144592	29.6567	2.77776e-193	2.05958e-191	Fzd4
		55.3533	1.90147	0.46682	4.07324	4.63629e-05	0.000394964	Vnn1				1196.59	4.28629	0.106049	40.4181	0	0	Chrm1
		3139.22	1.90137	0.140978	13.487	1.8651e-41	5.96003e-39	Plk2				22.6867	4.26829	0.686354	6.21878	5.01038e-10	1.522e-09	Nalcn
		1068.93	1.89774	0.204823	9.26524	1.94638e-20	1.52945e-18	Ifit1				84.1317	4.26371	0.357774	11.9173	9.61472e-33	7.69226e-32	Edar
		13493.1	1.89174	0.120714	15.6712	2.37878e-55	1.6289e-52	Fibin				35.2693	4.23859	0.546286	7.75892	8.56577e-15	3.35015e-14	Serpinb11
		499.662	1.87254	0.173786	10.775	4.51885e-27	5.75053e-25	Mn1				282.306	4.23307	0.228483	18.5268	1.25479e-76	2.56033e-75	Ace2
		2787.17	1.87003	0.256317	7.29576	2.96975e-13	1.01437e-11	Ifitm10				282.643	4.23076	0.199664	21.1895	1.19466e-99	3.31587e-98	Ccdc37
		94.8575	1.86628	0.377961	4.93777	7.90203e-07	9.99395e-06	Atp10b				126.292	4.22386	0.296778	14.2324	5.76697e-46	6.59506e-45	Gm15663
		704.876	1.86442	0.265684	7.01741	2.26017e-12	6.90047e-11	Tnfrsf21				750.154	4.21979	0.172734	24.4294	8.33675e-132	3.3081e-130	Pard3b
		1784.09	1.86181	0.121778	15.2885	9.12326e-53	5.2477e-50	Oasl2				28.153	4.20876	0.62733	6.709	1.95968e-11	6.47609e-11	Slc39a8
		2105.42	1.84766	0.124744	14.8116	1.23293e-49	6.33196e-47	Prss23				322.012	4.20411	0.410895	10.2316	1.43125e-24	8.56202e-24	B4galnt2
		1043.67	1.84507	0.251424	7.33851	2.15989e-13	7.50221e-12	Efnb2				12.2958	4.20013	0.961388	4.36881	1.24923e-05	2.80004e-05	Ms4a4b
		61.3303	1.84387	0.37591	4.90509	9.33843e-07	1.16366e-05	Slc5a1				15.4823	4.19144	0.803298	5.21779	1.81074e-07	4.62211e-07	Syn2
		8380.26	1.84196	0.24052	7.65824	1.88503e-14	7.48806e-13	Clu				562.78	4.18373	0.167872	24.9222	4.27594e-137	1.78651e-135	Hivep3
		95.3152	1.84024	0.347103	5.30172	1.14714e-07	1.70765e-06	Wfdc5				13856.4	4.17012	0.208044	20.0444	2.25934e-89	5.49795e-88	Cxcl5
		17158.1	1.83207	0.312093	5.87026	4.35121e-09	8.20057e-08	Adgrg2				18.0883	4.15083	0.80039	5.18601	2.14852e-07	5.45964e-07	Otoa
		227.994	1.82963	0.250889	7.29258	3.04074e-13	1.03616e-11	Lsp1				178.204	4.10325	0.244335	16.7935	2.72187e-63	4.37298e-62	Cldn8
		366.245	1.82915	0.337322	5.42258	5.87445e-08	9.21206e-07	Smim5				17.2379	4.07108	0.767129	5.3069	1.11503e-07	2.89299e-07	St6galnac1
		33657.6	1.82809	0.28484	6.41796	1.38114e-10	3.17264e-09	Slpi				77.022	4.07054	0.375848	10.8303	2.47452e-27	1.65313e-26	Arhgef38
		57.9709	1.82782	0.422881	4.32229	1.54415e-05	0.000148429	Mertk				57.0587	4.06884	0.420136	9.68458	3.50655e-22	1.90699e-21	8430426J06Rik
		825.337	1.81533	0.283419	6.40512	1.5025e-10	3.44593e-09	Krt42				17.0741	4.06578	0.743663	5.46724	4.5709e-08	1.22125e-07	Ly6f
		7650.61	1.80897	0.283417	6.38271	1.73982e-10	3.93538e-09	Zcchc5				3405.37	4.01122	0.0812621	49.3615	0	0	Hectd2
		68.4028	1.78517	0.418515	4.26548	1.99476e-05	0.000186992	4833423E24Rik				2421.32	4.00723	0.09412	42.5757	0	0	Pde9a
		13195.9	1.78254	0.103909	17.1548	5.7833e-66	9.24042e-63	Spns2				26.8262	3.97335	0.604819	6.56949	5.0489e-11	1.62829e-10	Adam22
		3575.56	1.78104	0.16436	10.8362	2.31969e-27	3.08862e-25	41522				471.488	3.97262	0.146858	27.0507	3.74802e-161	2.00653e-159	E230016K23Rik
		10310.6	1.77678	0.20882	8.50865	1.75966e-17	1.02861e-15	Enpp3				10.8009	3.96935	0.958875	4.13959	3.47922e-05	7.51673e-05	Eif4e1b
		4460.47	1.77362	0.20208	8.77683	1.68149e-18	1.08918e-16	Tinagl1				1079.55	3.94646	0.108848	36.2567	7.78022e-288	1.00716e-285	Zdhhc23
		3488.1	1.7616	0.112143	15.7085	1.32218e-55	9.5065e-53	Arg1				86.2068	3.93491	0.336088	11.708	1.1602e-31	8.93374e-31	Rbm20
		885.4	1.75909	0.458633	3.83551	0.000125306	0.000952885	Hectd2				72.9259	3.92735	0.40027	9.81175	1.00211e-22	5.59038e-22	Acta2
		2369.68	1.75576	0.159505	11.0076	3.514e-28	4.85878e-26	Igfbp7				7.85606	3.91777	1.10894	3.53289	0.000411044	0.000802028	Aspn
		126.635	1.73967	0.25452	6.8351	8.19485e-12	2.34745e-10	Rapgef3				5696.08	3.9149	0.0733471	53.375	0	0	Itpr1
		95.2359	1.73547	0.246738	7.03366	2.0118e-12	6.16837e-11	Phf11d				204.208	3.91198	0.228067	17.1528	5.99002e-66	1.00746e-64	Gdf5
		81.066	1.72285	0.34511	4.99217	5.97056e-07	7.73484e-06	Pnldc1				206.22	3.90999	0.230684	16.9496	1.93845e-64	3.18232e-63	Sytl5
		86.7789	1.72187	0.381968	4.50788	6.54793e-06	6.7985e-05	Mtus2				69.3523	3.90986	0.373219	10.476	1.11304e-25	6.96998e-25	C4b
		20.275	1.72155	0.441129	3.90259	9.51688e-05	0.000744979	Slco2b1				68.9549	3.90324	0.369997	10.5494	5.11419e-26	3.25548e-25	Hsf2bp
		358.247	1.72109	0.185874	9.25947	2.05447e-20	1.59694e-18	Cdr2				336.023	3.89549	0.186591	20.8772	8.62492e-97	2.2893e-95	Dapk1
		368.397	1.71801	0.260106	6.60505	3.97372e-11	1.01235e-09	Rnase1				1063.4	3.8917	0.150923	25.7859	1.27558e-146	5.78885e-145	Arg2
		217.479	1.71446	0.284118	6.03431	1.59647e-09	3.14053e-08	Trmt61a				17.7376	3.8854	0.707869	5.48887	4.04519e-08	1.08501e-07	Crip3
		192474	1.70954	0.271047	6.30718	2.84157e-10	6.25755e-09	Igfbp5				198.957	3.87938	0.227086	17.0833	1.97663e-65	3.31039e-64	Gm5662
		110.046	1.70423	0.384093	4.43704	9.12049e-06	9.18436e-05	Ly6g6c				2343.82	3.87489	0.11944	32.4422	6.97122e-231	6.43839e-229	Tnfrsf21
		133.037	1.70081	0.367696	4.62557	3.73563e-06	4.09851e-05	Ifit3				12.7147	3.87387	0.878249	4.4109	1.0294e-05	2.32016e-05	9030619P08Rik
		391.34	1.70055	0.220039	7.7284	1.08906e-14	4.4873e-13	Gnai1				2430.5	3.85057	0.092502	41.6268	0	0	Prr15l
		1749.25	1.68925	0.271829	6.21439	5.15238e-10	1.09765e-08	Slc46a1				9.70755	3.82536	0.978079	3.91109	9.18806e-05	0.000191611	Klhl29
		287.153	1.6876	0.183506	9.19643	3.7003e-20	2.83033e-18	Acss1				857.59	3.82026	0.128977	29.6197	8.33982e-193	6.12608e-191	Col9a2
		74.6925	1.68329	0.411697	4.08865	4.33883e-05	0.000375858	Iigp1				8406.11	3.78602	0.0596793	63.4394	0	0	Btn1a1
		99.3891	1.67666	0.392552	4.27118	1.9444e-05	0.000183107	Pglyrp1				14.1576	3.78392	0.792849	4.77256	1.81895e-06	4.34529e-06	Cib3
		1801.1	1.66887	0.150923	11.0577	2.01186e-28	2.89305e-26	Slc25a35				9.4477	3.76722	0.957395	3.93486	8.3245e-05	0.000174293	Opn1mw
		71.2657	1.66695	0.296184	5.62809	1.82216e-08	3.10091e-07	Npnt				838.316	3.75428	0.134458	27.9216	1.45795e-171	8.92458e-170	Me3
		1050.83	1.66677	0.275944	6.04025	1.53877e-09	3.03116e-08	Aldh3b2				43.9925	3.74802	0.449562	8.33704	7.61709e-17	3.25126e-16	Plekhs1
		2309.47	1.66324	0.175555	9.47422	2.68768e-21	2.26017e-19	Rtp4				18.4457	3.74631	0.680401	5.50604	3.67005e-08	9.87244e-08	Kndc1
		2744.13	1.66066	0.229649	7.2313	4.78402e-13	1.58878e-11	Il1rn				20.7871	3.73979	0.649702	5.75616	8.60497e-09	2.41554e-08	Klk11
		5156.74	1.65967	0.212615	7.80599	5.90369e-15	2.5648e-13	Plekhf1				89.7222	3.7345	0.333768	11.1889	4.62063e-29	3.23895e-28	Stard8
		1916.51	1.65181	0.13491	12.2438	1.81264e-34	3.77764e-32	Osgin2				2778.77	3.72283	0.216919	17.1623	5.08439e-66	8.56966e-65	Papss2
		11724.8	1.64656	0.129586	12.7063	5.45726e-37	1.33009e-34	Gdpd1				130.932	3.71272	0.333008	11.149	7.23935e-29	5.0455e-28	AI607873
		179.779	1.63183	0.212659	7.67347	1.674e-14	6.66817e-13	Gjb2				172.167	3.70974	0.242234	15.3147	6.10053e-53	8.05566e-52	Sult5a1
		46.616	1.63092	0.349897	4.66113	3.14472e-06	3.52189e-05	Klk14				4106.17	3.70924	0.0716841	51.7443	0	0	Slc16a2
		158.302	1.62352	0.39875	4.07153	4.67053e-05	0.000397174	Pard3b				50657.9	3.66432	0.0913499	40.1131	0	0	Adgrg2
		1025.24	1.61933	0.142936	11.3291	9.41854e-30	1.47216e-27	Slc24a3				1374.1	3.66368	0.102437	35.7651	3.8551e-280	4.71965e-278	Ptpn18
		170.656	1.61029	0.223401	7.20806	5.67536e-13	1.86754e-11	Tspan15				67.592	3.65421	0.39411	9.27206	1.82578e-20	9.183e-20	2310007B03Rik
		109.254	1.60219	0.264779	6.05103	1.43922e-09	2.85461e-08	Chrd				12.9759	3.64737	0.802666	4.54407	5.51773e-06	1.27103e-05	Zfp366
		122.967	1.59538	0.23677	6.73811	1.6046e-11	4.34541e-10	Rasgef1b				150.784	3.63682	0.238875	15.2248	2.42178e-52	3.16354e-51	Bpifb4
		98991.4	1.59393	0.159002	10.0246	1.18828e-23	1.19493e-21	Perp				32.2689	3.62955	0.526036	6.89982	5.20685e-12	1.7776e-11	Scgb2b27
		35.1666	1.59168	0.402476	3.95473	7.66205e-05	0.000616911	Ifit1bl2				40.4879	3.61955	0.45884	7.88848	3.05879e-15	1.2205e-14	Synpr
		253.488	1.58891	0.352313	4.50995	6.48441e-06	6.74716e-05	Rgcc				36.2028	3.61849	0.526408	6.87392	6.24595e-12	2.12271e-11	Map7d2
		719.231	1.58738	0.274444	5.784	7.29459e-09	1.33456e-07	Orai1				68508.6	3.60874	0.0780622	46.2291	0	0	Wfdc18
		3397.21	1.58564	0.127107	12.4749	1.02366e-35	2.33655e-33	Sesn1				1129.67	3.58963	0.134636	26.6618	1.30582e-156	6.65254e-155	Rasd1
		144.296	1.58475	0.339597	4.66657	3.06276e-06	3.43813e-05	Lims2				14.66	3.57801	0.772461	4.63197	3.62207e-06	8.46204e-06	Sidt1
		9633.58	1.5786	0.177742	8.88142	6.60114e-19	4.47756e-17	Per1				133.955	3.5666	0.325112	10.9704	5.30571e-28	3.6227e-27	Oas2
		410.661	1.57618	0.277149	5.68713	1.29191e-08	2.26656e-07	8430408G22Rik				4362.18	3.56552	0.0706857	50.4419	0	0	Cebpd
		1231.87	1.57419	0.218674	7.1988	6.0746e-13	1.98529e-11	Fam46b				8.20847	3.55384	1.00437	3.53838	0.000402595	0.000786515	Sntg1
		46.9419	1.56277	0.293818	5.31886	1.04422e-07	1.56578e-06	Ntn3				10.2331	3.55343	0.883753	4.02084	5.799e-05	0.00012308	Perm1
		4870.67	1.55183	0.140715	11.0282	2.79403e-28	3.90079e-26	Col9a1				1075.43	3.55334	0.131847	26.9506	5.61898e-160	2.96791e-158	Rnase1
		558.156	1.54683	0.286666	5.39595	6.81621e-08	1.05395e-06	Fkbp11				84.2648	3.52495	0.306951	11.4837	1.59266e-30	1.17757e-29	Nos1ap
		1529.76	1.54088	0.187452	8.22017	2.03223e-16	1.03998e-14	Irf7				224.58	3.52259	0.53303	6.60862	3.87926e-11	1.26034e-10	Mx2
		57.3748	1.53262	0.283163	5.4125	6.21523e-08	9.66217e-07	Amy1				9.86149	3.49322	0.899437	3.88378	0.000102844	0.000213713	Gfpt2
		592.461	1.53015	0.2273	6.73182	1.67548e-11	4.52035e-10	Prss22				47.2056	3.48318	0.542763	6.4175	1.38535e-10	4.35226e-10	Ibsp
		943.004	1.52909	0.19428	7.87059	3.52982e-15	1.57148e-13	Plekhb1				1345.64	3.47714	0.116502	29.8462	9.83977e-196	7.58046e-194	Lrrc8b
		31.7591	1.52682	0.339839	4.49277	7.03013e-06	7.25723e-05	Masp2				36.7578	3.47287	0.478273	7.26128	3.83451e-13	1.38673e-12	Lcp2
		45.988	1.52244	0.340028	4.4774	7.55562e-06	7.75517e-05	0610040J01Rik				9.58471	3.46628	0.915605	3.78578	0.000153229	0.00031306	Mcoln2
		2510.95	1.51902	0.165191	9.19558	3.72977e-20	2.83778e-18	Csad				3704.61	3.4635	0.0903433	38.3371	0	0	Amigo2
		401.469	1.5178	0.143948	10.544	5.41268e-26	6.5407e-24	Uroc1				536.056	3.44338	0.339226	10.1507	3.28969e-24	1.93931e-23	Usp18
		172.458	1.5132	0.179819	8.41515	3.92408e-17	2.18714e-15	Gdpd2				12763.5	3.44299	0.0678734	50.7267	0	0	Mmp15
		270.252	1.49843	0.311425	4.81153	1.49776e-06	1.79183e-05	Lincppara				2561.54	3.43414	0.109858	31.2597	1.64814e-214	1.42235e-212	St3gal4
		3490.58	1.49765	0.136778	10.9495	6.68058e-28	9.14921e-26	Vtcn1				1137.87	3.43182	0.102787	33.3878	2.05922e-244	2.05831e-242	2010300C02Rik
		1963.11	1.49292	0.321715	4.64052	3.4753e-06	3.85608e-05	Wnt4				21213.2	3.43168	0.0802513	42.7617	0	0	Clu
		2350.53	1.48838	0.246085	6.04823	1.46447e-09	2.88876e-08	Slc35b1				740.71	3.43111	0.125017	27.4451	7.95971e-166	4.57119e-164	P2rx5
		176.019	1.48165	0.21887	6.76954	1.29189e-11	3.58636e-10	Homer2				15.2866	3.42664	0.774656	4.42344	9.7141e-06	2.19603e-05	Hapln3
		1392.63	1.4814	0.321152	4.61276	3.97352e-06	4.32873e-05	Rap1gap2				17.0705	3.41756	0.714495	4.78318	1.7254e-06	4.12741e-06	Klhl33
		299.156	1.47706	0.219079	6.74214	1.56067e-11	4.24242e-10	Aif1l				16822.6	3.41163	0.0840765	40.5776	0	0	Mme
		930.72	1.47128	0.201966	7.28478	3.22189e-13	1.09271e-11	Aen				60428.8	3.4097	0.072031	47.3366	0	0	Cst3
		708.353	1.46864	0.183397	8.00797	1.16621e-15	5.48043e-14	Lgals9				11.1665	3.40809	0.829475	4.10873	3.97839e-05	8.56238e-05	C2
		1182.89	1.46723	0.25772	5.6931	1.2475e-08	2.20112e-07	Srm				117.255	3.40484	0.283062	12.0286	2.51375e-33	2.04955e-32	Gsta3
		329.048	1.46399	0.184274	7.94468	1.94688e-15	8.85952e-14	Ttc7b				520.663	3.37033	0.125849	26.7807	5.42019e-158	2.78831e-156	Grin1os
		3643.02	1.46377	0.325461	4.49754	6.87435e-06	7.10663e-05	Nupr1				69.4735	3.36767	0.399147	8.43717	3.25123e-17	1.41334e-16	Endou
		768.374	1.46322	0.371445	3.93927	8.17308e-05	0.00065113	Ttc36				635.286	3.36563	0.295795	11.3783	5.3658e-30	3.89619e-29	Shc2
		7681.93	1.46273	0.234803	6.2296	4.67617e-10	1.00513e-08	Bcl2l1				14.4947	3.35944	0.719972	4.66607	3.07011e-06	7.20877e-06	Tex12
		67.5139	1.45829	0.348038	4.19003	2.78917e-05	0.00025369	Slc15a2				818.32	3.35445	0.115082	29.1485	8.73675e-187	6.07839e-185	Cish
		232.189	1.45408	0.207346	7.01282	2.33554e-12	7.0557e-11	Cldn23				9.02289	3.35221	0.904099	3.70779	0.000209074	0.000421268	Serpina3f
		38.9939	1.45223	0.335373	4.3302	1.48976e-05	0.000143584	Atp1a2				14.4543	3.3462	0.748675	4.4695	7.84039e-06	1.78487e-05	Heph
		2508.28	1.45207	0.144733	10.0327	1.09454e-23	1.10841e-21	Eps8l1				28.3663	3.32171	0.510407	6.50797	7.6175e-11	2.43135e-10	Thrsp
		767.497	1.45023	0.174457	8.31282	9.34552e-17	4.97736e-15	Kctd14				4563.85	3.29189	0.0744596	44.2104	0	0	Ano1
		9890.16	1.44973	0.256308	5.6562	1.54761e-08	2.66841e-07	Barx2				24.3434	3.29122	0.55715	5.90725	3.47876e-09	9.99274e-09	Mx1
		70363	1.44142	0.15226	9.46686	2.88373e-21	2.41094e-19	Sulf2				7465.45	3.27498	0.0539932	60.6554	0	0	Ggact
		4043.79	1.44129	0.143853	10.0192	1.25502e-23	1.25328e-21	Jade2				683.522	3.274	0.140693	23.2705	8.82883e-120	3.15461e-118	Mest
		486.497	1.43989	0.181836	7.91863	2.40134e-15	1.0791e-13	Scarf2				140.546	3.27215	0.230409	14.2015	8.96536e-46	1.01863e-44	Slc5a1
		2068.05	1.43933	0.279691	5.14613	2.65917e-07	3.71613e-06	Rab4a				10.1881	3.26305	0.836977	3.89861	9.67476e-05	0.000201415	Mt3
		4618	1.43244	0.116121	12.3357	5.81454e-35	1.2296e-32	Itpripl1				18.8154	3.25488	0.665604	4.89011	1.0078e-06	2.45394e-06	Daam2
		531.889	1.43053	0.255188	5.60578	2.07315e-08	3.49904e-07	Erg				13001.5	3.2427	0.0789769	41.0588	0	0	Ceacam1
		68.3909	1.43029	0.373721	3.82717	0.000129627	0.000980039	Slc22a17				427.809	3.2349	0.15851	20.4081	1.41566e-92	3.57719e-91	Fam107a
		81.0893	1.42952	0.335043	4.26669	1.98398e-05	0.000186346	Amigo3				343.542	3.2256	0.181914	17.7315	2.39535e-70	4.40907e-69	Dlk2
		8149.34	1.42402	0.246126	5.78575	7.21897e-09	1.32241e-07	Fbxo32				3557.33	3.22558	0.0925563	34.8499	4.26823e-266	4.74705e-264	Deptor
		913471	1.42178	0.199113	7.14057	9.29468e-13	2.97017e-11	Postn				351.035	3.21466	0.162276	19.8099	2.44657e-87	5.83665e-86	Ttpa
		234.575	1.41877	0.250181	5.67096	1.41996e-08	2.46606e-07	P2rx5				179.614	3.21203	0.250571	12.8188	1.28602e-37	1.18357e-36	Iigp1
		877.559	1.41293	0.181397	7.78914	6.7467e-15	2.87886e-13	Tgm5				27.7725	3.20925	0.559887	5.73196	9.92775e-09	2.77404e-08	Itih2
		4338.79	1.40656	0.115308	12.1983	3.17415e-34	6.52062e-32	Sik1				2279.72	3.19989	0.075812	42.2082	0	0	Efnb2
		232.258	1.39706	0.214376	6.51685	7.17995e-11	1.74111e-09	4930451G09Rik				17.8914	3.18637	0.647595	4.92032	8.64048e-07	2.11499e-06	Ptafr
		815.085	1.39545	0.230629	6.05066	1.44257e-09	2.85731e-08	BC064078				477.94	3.18569	0.134787	23.6351	1.68083e-123	6.29036e-122	Edn1
		2410.32	1.39526	0.26332	5.29875	1.16598e-07	1.73211e-06	Bst2				816.011	3.18563	0.128424	24.8055	7.81916e-136	3.1909e-134	Ccdc141
		57.1991	1.39109	0.346309	4.0169	5.89681e-05	0.000486775	Gjc2				162.72	3.18555	0.512866	6.21127	5.25577e-10	1.59532e-09	Lpl
		7055.4	1.38953	0.10281	13.5156	1.2657e-41	4.13653e-39	Ctps				61181.9	3.18152	0.075419	42.1846	0	0	Ank
		64839	1.38622	0.193323	7.17048	7.47367e-13	2.40967e-11	Calr				850.614	3.14761	0.109748	28.6804	6.69082e-181	4.42126e-179	Ttc7b
		124.678	1.38371	0.279994	4.94192	7.73568e-07	9.82677e-06	5430437J10Rik				14.2098	3.14325	0.73686	4.26574	1.99243e-05	4.39168e-05	Dsg4
		350.821	1.38098	0.199962	6.90619	4.97836e-12	1.45211e-10	Sarm1				10.8541	3.12897	0.808785	3.86873	0.000109402	0.000226685	Pde8b
		19214.7	1.37797	0.160077	8.60818	7.42311e-18	4.48506e-16	Gas6				31.0132	3.11435	0.481462	6.46854	9.89563e-11	3.13315e-10	4930415O20Rik
		125.628	1.37726	0.274825	5.01139	5.40396e-07	7.07088e-06	Srcin1				26.3861	3.10995	0.525968	5.91281	3.36323e-09	9.66791e-09	Sdpr
		3122.33	1.3756	0.157177	8.75189	2.09807e-18	1.3409e-16	Arf2				2125.48	3.10849	0.103671	29.9843	1.57425e-197	1.2308e-195	BC064078
		178.009	1.37427	0.290685	4.72769	2.27092e-06	2.63566e-05	Nbl1				2112.67	3.09797	0.104178	29.7373	2.53488e-194	1.92468e-192	Cxcl12
		2149.14	1.37348	0.183298	7.49317	6.72321e-14	2.46632e-12	Slfn2				29651	3.08669	0.0688324	44.8436	0	0	Pik3r1
		4369.79	1.37247	0.162604	8.44056	3.1583e-17	1.76718e-15	D8Ertd82e				237.869	3.08231	0.180891	17.0396	4.17663e-65	6.95063e-64	Arhgap26
		2419.98	1.36577	0.281684	4.8486	1.24338e-06	1.50884e-05	Cldn4				106.213	3.08216	0.2666	11.561	6.4947e-31	4.87968e-30	4732456N10Rik
		8046.23	1.36461	0.121228	11.2565	2.15035e-29	3.32495e-27	Rhou				12.0877	3.07645	0.770997	3.99023	6.60097e-05	0.000139557	Tmem45a
		1755.69	1.35907	0.138383	9.82103	9.14087e-23	8.64774e-21	Shpk				50217.6	3.07569	0.0596603	51.5534	0	0	Mfge8
		253.798	1.35216	0.219464	6.16117	7.22111e-10	1.49195e-08	Klk10				116.655	3.05339	0.247202	12.3518	4.7628e-35	4.08133e-34	Slc37a1
		238.186	1.34686	0.348071	3.8695	0.000109057	0.000843595	Sdsl				3787.5	3.03962	0.0848455	35.8254	4.44758e-281	5.53076e-279	Mcc
		3339.69	1.34466	0.156806	8.57528	9.88448e-18	5.92245e-16	Lbp				199.256	3.03825	0.25215	12.0494	1.95369e-33	1.60034e-32	Phf11d
		3096.1	1.3446	0.132527	10.1458	3.45946e-24	3.57892e-22	Bid				60.0807	3.02396	0.370015	8.17254	3.01956e-16	1.25959e-15	Ccdc13
		186.393	1.34211	0.328236	4.08887	4.33479e-05	0.000375858	Arhgdig				40.942	3.01155	0.418815	7.19064	6.44881e-13	2.3063e-12	Nsun7
		6895.57	1.34171	0.205118	6.54116	6.10452e-11	1.49545e-09	Fam20c				47535.8	3.00826	0.0664093	45.2988	0	0	Gas6
		3208.25	1.32437	0.20291	6.52692	6.71376e-11	1.63912e-09	Chpf				48.0922	3.00381	0.396816	7.56978	3.73853e-14	1.42032e-13	Man1c1
		904.295	1.32294	0.234028	5.65292	1.57746e-08	2.71014e-07	AU021092				430.84	2.99882	0.17328	17.3062	4.22036e-67	7.28438e-66	Dio2
		134.502	1.31323	0.275593	4.7651	1.88762e-06	2.21223e-05	Prex1				531.059	2.99743	0.180004	16.6521	2.92358e-62	4.57149e-61	Arl14epl
		140.657	1.31082	0.21005	6.24054	4.36058e-10	9.42935e-09	Plaur				138.438	2.9875	0.248575	12.0185	2.84012e-33	2.31088e-32	Cfb
		606.967	1.30679	0.196297	6.65723	2.79045e-11	7.25618e-10	Adamts15				37.0919	2.97452	0.436507	6.81438	9.46716e-12	3.18999e-11	Tgtp1
		41.4886	1.30551	0.305838	4.26865	1.96659e-05	0.000184955	Slc13a4				462824	2.97379	0.0679682	43.7526	0	0	Ctsd
		12058.6	1.30403	0.227781	5.72492	1.03482e-08	1.84625e-07	Gmds				13192.4	2.96554	0.188986	15.6918	1.72015e-55	2.40622e-54	Mfap3l
		652.592	1.29392	0.246336	5.25267	1.4991e-07	2.19522e-06	C030006K11Rik				834.765	2.9633	0.169487	17.484	1.89774e-68	3.36376e-67	Cytip
		536.303	1.28615	0.265665	4.84123	1.29039e-06	1.558e-05	Gnb1l				3344.49	2.96102	0.0689356	42.9535	0	0	Pdgfc
		599.892	1.28546	0.135146	9.51168	1.87603e-21	1.60579e-19	Gm14137				22.4787	2.95731	0.609958	4.84838	1.24476e-06	3.0068e-06	Ppp1r16b
		75474	1.28372	0.211589	6.06705	1.3028e-09	2.60198e-08	Sparc				70.1461	2.95312	0.323544	9.12743	7.01459e-20	3.45329e-19	Tnf
		8773.54	1.27872	0.144595	8.84347	9.2793e-19	6.20634e-17	Osr1				2269.82	2.95234	0.114341	25.8205	5.21635e-147	2.38098e-145	C1qtnf1
		560.816	1.27746	0.217497	5.87347	4.26754e-09	8.07463e-08	Ankrd35				27.9177	2.94704	0.480369	6.13496	8.51813e-10	2.55172e-09	Prss27
		78.7006	1.27136	0.243264	5.22627	1.72961e-07	2.49217e-06	Ppef1				42.2589	2.94489	0.463967	6.3472	2.19267e-10	6.80599e-10	Gm7609
		3443.87	1.27011	0.204471	6.21168	5.24223e-10	1.11349e-08	Tmtc4				2684.81	2.92446	0.0876711	33.3572	5.72476e-244	5.6507e-242	Fam46a
		1220.15	1.26689	0.274119	4.62166	3.80678e-06	4.16602e-05	Haus7				7159.39	2.91897	0.0799366	36.516	6.18032e-292	8.13381e-290	Alcam
		276.401	1.26463	0.303612	4.1653	3.10945e-05	0.000279113	Ufsp1				724.324	2.91876	0.152187	19.1787	5.57363e-82	1.22768e-80	Rab17
		185.757	1.26038	0.216376	5.82497	5.71245e-09	1.05994e-07	Armc2				246.77	2.9152	0.165832	17.5793	3.5513e-69	6.35172e-68	Tmem125
		9036.73	1.25885	0.10457	12.0383	2.23569e-33	4.17523e-31	Bbox1				105.349	2.88767	0.265325	10.8835	1.3811e-27	9.31328e-27	Mertk
		653.753	1.25165	0.248573	5.03534	4.76991e-07	6.34517e-06	Fam101a				1038.67	2.88589	0.109346	26.3922	1.68277e-153	8.2534e-152	Slc25a23
		1583.44	1.24371	0.267487	4.64962	3.32555e-06	3.70421e-05	Bnipl				48.1217	2.88246	0.385136	7.48427	7.19478e-14	2.69963e-13	Dapk2
		7562.9	1.24304	0.173405	7.16839	7.58851e-13	2.44123e-11	BC006965				47.2087	2.88163	0.376318	7.65743	1.89695e-14	7.31945e-14	Rtn4rl1
		8401.14	1.22298	0.157738	7.75319	8.96108e-15	3.75686e-13	1700017B05Rik				126.526	2.87709	0.277201	10.379	3.08853e-25	1.90238e-24	Slc9a2
		786.411	1.2203	0.292721	4.1688	3.06206e-05	0.00027572	Mdfi				309.947	2.87099	0.198663	14.4515	2.45193e-47	2.88765e-46	Wif1
		1506.71	1.22003	0.154482	7.89757	2.84393e-15	1.27005e-13	Zfp651				10.7297	2.86928	0.797363	3.59847	0.0003201	0.000631917	Azgp1
		235.093	1.21646	0.264659	4.59632	4.30014e-06	4.64583e-05	Izumo4				164.641	2.86095	0.225356	12.6953	6.28031e-37	5.68395e-36	Mtus2
		9009.1	1.21165	0.210185	5.76469	8.18084e-09	1.4779e-07	Enpp1				171.779	2.85931	0.241305	11.8493	2.16909e-32	1.71453e-31	Tnfrsf19
		154.384	1.21144	0.280459	4.31951	1.56376e-05	0.000149913	Slc25a29				10.4854	2.85486	0.783395	3.64421	0.00026821	0.000534828	Cnksr2
		976.042	1.19912	0.217792	5.50578	3.67534e-08	5.94504e-07	Slc16a2				11100.7	2.85339	0.052874	53.9659	0	0	Muc15
		182.256	1.19869	0.29679	4.03883	5.37177e-05	0.000449367	Fam212a				17.1306	2.85189	0.597301	4.77462	1.80044e-06	4.30236e-06	Gcsam
		1695.52	1.19838	0.238092	5.03326	4.82212e-07	6.39879e-06	Sh3d21				335.765	2.83098	0.162498	17.4216	5.65332e-68	9.89832e-67	Tspan15
		253.69	1.18772	0.200271	5.93059	3.01855e-09	5.77986e-08	Pdia5				15.5183	2.82729	0.653425	4.32687	1.51244e-05	3.36658e-05	A930012L18Rik
		71.496	1.18691	0.276504	4.29257	1.7662e-05	0.000168422	Tspan33				10364.1	2.82682	0.228863	12.3516	4.77497e-35	4.08954e-34	Lgals3bp
		2316.09	1.18458	0.301978	3.92273	8.75521e-05	0.000691758	Pdlim2				73.3282	2.81154	0.3136	8.96537	3.09251e-19	1.48e-18	Wnt5b
		1819.72	1.18344	0.160816	7.35901	1.85282e-13	6.48263e-12	Krt6b				5487.69	2.81087	0.111845	25.1318	2.23439e-139	9.51151e-138	Fos
		8728.68	1.17934	0.194451	6.06494	1.31999e-09	2.62538e-08	Ephx1				5163.18	2.78912	0.066656	41.8435	0	0	Plk2
		8988.55	1.17213	0.11425	10.2593	1.07487e-24	1.15348e-22	Lurap1l				44.2353	2.78017	0.384956	7.22204	5.12119e-13	1.83983e-12	Wfdc17
		982.568	1.17066	0.205425	5.69871	1.20717e-08	2.13257e-07	Gbp3				359.327	2.77643	0.14302	19.4129	5.99991e-84	1.36145e-82	Slc25a29
		3680.75	1.17012	0.252361	4.6367	3.5402e-06	3.92507e-05	Eppk1				21.4509	2.77568	0.528535	5.25164	1.50748e-07	3.87494e-07	Gm13003
		1006.66	1.16987	0.294591	3.97117	7.15204e-05	0.000579416	Deb1				201.318	2.77264	0.197883	14.0115	1.32571e-44	1.46106e-43	Agt
		1009.91	1.16495	0.189095	6.16063	7.24555e-10	1.49485e-08	Sh3rf2				118.539	2.76179	0.284432	9.70985	2.73739e-22	1.49798e-21	Enpp2
		50.6879	1.16427	0.268951	4.32895	1.49824e-05	0.000144304	Synpo2l				47263.7	2.75228	0.20907	13.1644	1.40654e-39	1.35862e-38	Col2a1
		3075.98	1.16357	0.152221	7.64397	2.10621e-14	8.32067e-13	Grhl1				28.2308	2.74686	0.560041	4.90474	9.3549e-07	2.28314e-06	Serpina3g
		1509.99	1.15883	0.281875	4.11115	3.93696e-05	0.000344993	Tmed1				14.6963	2.74325	0.688549	3.9841	6.77364e-05	0.000143016	Serpina3k
		34259.2	1.15696	0.149719	7.72757	1.09615e-14	4.50362e-13	Gm2a				11.0543	2.73141	0.762292	3.58315	0.000339472	0.000668822	Brinp2
		337.286	1.14689	0.173276	6.61887	3.61957e-11	9.24502e-10	Tgm1				149.322	2.73026	0.274049	9.96269	2.21984e-23	1.26884e-22	Oas1g
		15694.5	1.13836	0.134638	8.45498	2.79132e-17	1.58653e-15	Surf4				32.924	2.72195	0.427384	6.36886	1.90434e-10	5.93199e-10	Olfml2b
		187.942	1.1374	0.262027	4.34079	1.41969e-05	0.000137291	Ggnbp1				134.743	2.71929	0.28987	9.38108	6.53013e-21	3.35057e-20	Slc15a2
		1194.99	1.13436	0.168888	6.7166	1.86008e-11	4.97174e-10	Psapl1				620.447	2.70296	0.115301	23.4427	1.57048e-121	5.70174e-120	Dock4
		83.3752	1.13245	0.278175	4.071	4.68109e-05	0.000397837	Agt				16.621	2.69116	0.65459	4.11121	3.93584e-05	8.47542e-05	Pipox
		5185.31	1.13149	0.177028	6.39159	1.64174e-10	3.74139e-09	Irs1				7863.95	2.68719	0.0964831	27.8514	1.03498e-170	6.28674e-169	Ldlrad3
		3119.51	1.12868	0.18539	6.08815	1.14223e-09	2.28764e-08	Arhgap44				407.993	2.6816	0.17347	15.4586	6.60022e-54	8.93208e-53	Rnf125
		80.1804	1.1206	0.258094	4.34185	1.41286e-05	0.000136814	4930581F22Rik				16.5556	2.6719	0.608934	4.38783	1.14486e-05	2.57267e-05	1810064F22Rik
		559.202	1.11862	0.248681	4.49822	6.8525e-06	7.08913e-05	Ccdc101				28.3097	2.66835	0.472973	5.64164	1.68434e-08	4.63669e-08	Timd2
		7483.51	1.117	0.22345	4.99888	5.76632e-07	7.49726e-06	Chst11				863.241	2.66132	0.134608	19.7709	5.30637e-87	1.25831e-85	Fbln7
		10314.7	1.11664	0.197463	5.65493	1.55913e-08	2.68506e-07	Itm2c				16181.3	2.65636	0.0521583	50.9289	0	0	Rhou
		274.894	1.11523	0.240278	4.64143	3.46009e-06	3.84513e-05	Nkpd1				68.1011	2.65266	0.33631	7.88755	3.08185e-15	1.22908e-14	Chrdl2
		6776.76	1.1138	0.109746	10.1489	3.35165e-24	3.49252e-22	Tmem167				2664	2.64816	0.0910418	29.0873	5.19678e-186	3.59968e-184	Kank4
		5444.22	1.11336	0.108824	10.2309	1.44247e-24	1.5252e-22	Slc12a4				6969.32	2.64793	0.0560857	47.2122	0	0	Rhoj
		348.661	1.11287	0.24173	4.60378	4.14889e-06	4.50612e-05	Il15				3286.86	2.63583	0.071561	36.8333	5.40556e-297	7.23475e-295	Osgin2
		5017.03	1.11158	0.285166	3.89802	9.69833e-05	0.000757123	Pdrg1				15434.3	2.62867	0.0687088	38.2582	0	0	Egr1
		2135.35	1.11018	0.178507	6.21925	4.9953e-10	1.06894e-08	Vimp				40440.5	2.62672	0.084416	31.1164	1.44709e-212	1.2287e-210	D17H6S56E-5
		30860.7	1.10991	0.102121	10.8686	1.62596e-27	2.20578e-25	Hspa5				4280.29	2.62436	0.0574617	45.6715	0	0	Clec2d
		445.371	1.10877	0.268574	4.12836	3.65358e-05	0.000323513	Ap4s1				25.3899	2.61959	0.491933	5.3251	1.00899e-07	2.6265e-07	Gm2016
		67.2222	1.10838	0.284486	3.89607	9.77647e-05	0.000762406	Tbc1d10c				7095.86	2.61827	0.0625786	41.8398	0	0	Tmtc4
		47.3463	1.10551	0.281729	3.924	8.70915e-05	0.000688497	Fhl1				56.2547	2.61584	0.360019	7.26583	3.70758e-13	1.34236e-12	Pik3cg
		958.44	1.1049	0.281114	3.93045	8.4787e-05	0.000672497	Klf2				2972.89	2.61191	0.0919676	28.4003	2.00531e-177	1.29795e-175	Klhdc7a
		80.656	1.10401	0.231889	4.76094	1.9269e-06	2.25642e-05	Fam65b				1186.7	2.61109	0.123886	21.0766	1.30506e-98	3.55972e-97	Tc2n
		1942.02	1.10243	0.105076	10.4918	9.42605e-26	1.11104e-23	Ppm1h				843.436	2.60984	0.13933	18.7314	2.74661e-78	5.79136e-77	Cftr
		1202.97	1.10004	0.24417	4.50523	6.63014e-06	6.87889e-05	Rpl22l1				61.3866	2.60883	0.335548	7.77483	7.55462e-15	2.96055e-14	Ifit1bl2
		7927.71	1.09393	0.204401	5.35189	8.70427e-08	1.32312e-06	Atp6v1c2				75065.3	2.60385	0.0570869	45.6121	0	0	Ehf
		10963.5	1.0929	0.248461	4.39868	1.08909e-05	0.000107859	Ckmt1				7031.06	2.6036	0.0680197	38.2772	0	0	Tinagl1
		3033.35	1.09226	0.155703	7.01501	2.2993e-12	6.99027e-11	Sgsm3				81.7977	2.60259	0.287213	9.06153	1.28638e-19	6.2491e-19	Vnn1
		1333.21	1.09114	0.169531	6.43625	1.22463e-10	2.84035e-09	Jdp2				170.892	2.60214	0.215999	12.047	2.011e-33	1.64643e-32	Ccrl2
		4642.15	1.087	0.233691	4.65145	3.29614e-06	3.6743e-05	Sphk1				19755.4	2.59334	0.0596752	43.4576	0	0	Slc12a2
		3231.91	1.07915	0.248881	4.336	1.45099e-05	0.000140224	Manf				42.96	2.59187	0.374103	6.92823	4.26141e-12	1.46178e-11	Strip2
		17024.7	1.07849	0.127147	8.48224	2.20892e-17	1.27273e-15	Ehd2				14.5881	2.58482	0.679633	3.80326	0.000142807	0.000292903	F830016B08Rik
		1264	1.07835	0.167748	6.42838	1.28969e-10	2.97208e-09	Ndufaf4				42.704	2.58399	0.395712	6.52997	6.57849e-11	2.10867e-10	Adamts3
		599.831	1.07562	0.215333	4.99513	5.87947e-07	7.62369e-06	Pinx1				178.401	2.58366	0.190731	13.5461	8.3562e-42	8.64806e-41	Tprg
		384.959	1.06982	0.175753	6.08706	1.15006e-09	2.30011e-08	B3galt6				183.398	2.58292	0.189894	13.6019	3.90221e-42	4.06514e-41	Tmprss11a
		1105.28	1.06939	0.251662	4.24933	2.1441e-05	0.000199303	Dhrs4				3619.99	2.58233	0.233868	11.0418	2.40071e-28	1.6542e-27	Fxyd2
		1202.74	1.06887	0.268879	3.9753	7.02892e-05	0.000570728	Creld2				64.7907	2.57806	0.329622	7.82125	5.23017e-15	2.06242e-14	Adcy5
		1159.13	1.06867	0.190971	5.59595	2.19417e-08	3.686e-07	Snx11				4528.09	2.57314	0.102066	25.2105	3.07538e-140	1.31625e-138	Gyk
		1253.03	1.06715	0.164752	6.47727	9.33982e-11	2.21994e-09	Foxred2				21.1611	2.55754	0.537314	4.75987	1.93721e-06	4.6194e-06	Arhgap6
		273.755	1.0664	0.199718	5.33951	9.31969e-08	1.40922e-06	Gpnmb				564.332	2.54329	0.162511	15.6499	3.32521e-55	4.62688e-54	Muc1
		7873.12	1.06608	0.107673	9.90107	4.1185e-23	3.92212e-21	Matn2				3631.08	2.54005	0.0990001	25.657	3.52894e-145	1.57882e-143	Igfbp7
		302.94	1.06486	0.163259	6.52252	6.9138e-11	1.6794e-09	2010300C02Rik				334.314	2.5297	0.164354	15.3918	1.85901e-53	2.49018e-52	Hs3st1
		1195.17	1.06485	0.146867	7.25046	4.15364e-13	1.38906e-11	Pdgfc				52.0002	2.52946	0.357115	7.08304	1.4103e-12	4.96718e-12	Pknox2
		153.214	1.06155	0.195695	5.42455	5.8102e-08	9.13122e-07	5730508B09Rik				208.472	2.52652	0.255691	9.88118	5.02377e-23	2.84069e-22	Ifit3
		473.95	1.06081	0.261905	4.05036	5.1139e-05	0.000429293	Rdm1				10754.3	2.51673	0.0679708	37.0267	4.26514e-300	5.75721e-298	Irs1
		2307.28	1.0597	0.226472	4.67914	2.8808e-06	3.26445e-05	Nqo1				250.544	2.51673	0.163652	15.3785	2.28152e-53	3.04324e-52	Lipk
		98.1761	1.05808	0.205475	5.14944	2.61259e-07	3.66527e-06	Tmie				23.839	2.51251	0.562489	4.46677	7.94091e-06	1.80655e-05	Grb10
		1011.97	1.05554	0.191366	5.51583	3.47131e-08	5.65316e-07	Angptl4				18715.8	2.51085	0.0808741	31.0464	1.27578e-211	1.07745e-209	Gdpd1
		468.826	1.0547	0.260434	4.04977	5.12676e-05	0.00042987	Pcdhb9				130.218	2.5093	0.216239	11.6043	3.92102e-31	2.9629e-30	Clcnka
		5231.52	1.05217	0.168824	6.23234	4.59519e-10	9.89205e-09	Ube2g2				12.8027	2.50054	0.679078	3.68226	0.000231172	0.00046402	Syt3
		1089.92	1.0516	0.235711	4.46138	8.14333e-06	8.2757e-05	Ntf5				34.0775	2.49719	0.416421	5.99679	2.01256e-09	5.87294e-09	Plxdc2
		302.371	1.05142	0.156441	6.7209	1.80607e-11	4.83636e-10	E130317F20Rik				8067.5	2.48965	0.0764883	32.5494	2.1341e-232	1.99431e-230	Col9a1
		856.811	1.04825	0.133675	7.84179	4.44184e-15	1.95932e-13	Rrp12				13.7451	2.48731	0.682096	3.64658	0.000265757	0.000530005	Abca8a
		115.546	1.04429	0.251647	4.14984	3.3271e-05	0.000296429	Lipk				254335	2.48473	0.0707357	35.1269	2.61736e-270	2.99536e-268	Spp1
		25375.9	1.04315	0.109044	9.56633	1.10772e-21	9.5958e-20	Sun2				230.521	2.47432	0.167068	14.8103	1.25703e-49	1.54854e-48	Pik3ap1
		2472.61	1.03861	0.180718	5.74716	9.07569e-09	1.6334e-07	Mtss1l				35.1967	2.44985	0.476752	5.13863	2.76744e-07	6.98069e-07	Gpm6b
		994.253	1.03842	0.158532	6.55018	5.74675e-11	1.41803e-09	Slc10a3				2574.04	2.44814	0.0659063	37.1457	5.14191e-302	7.06141e-300	Foxred2
		3944.88	1.03641	0.135774	7.63335	2.28733e-14	8.98684e-13	Irf9				17254.8	2.44669	0.0562342	43.5089	0	0	Enpp1
		590.85	1.03485	0.203988	5.07312	3.91355e-07	5.30413e-06	Sostdc1				281.844	2.43812	0.192412	12.6713	8.52392e-37	7.70127e-36	Npr2
		244.477	1.03127	0.19225	5.3642	8.13109e-08	1.24124e-06	Cdhr1				57.1804	2.41866	0.357913	6.75768	1.40223e-11	4.67597e-11	Myom2
		951.342	1.03	0.193719	5.317	1.0549e-07	1.57908e-06	Amigo2				129.533	2.41506	0.273388	8.83381	1.0117e-18	4.70765e-18	Wfdc5
		645.963	1.02263	0.191876	5.32965	9.83997e-08	1.48322e-06	Msln				315.183	2.40891	0.153375	15.7061	1.37418e-55	1.92911e-54	Trmt61a
		10808.7	1.01996	0.19697	5.17827	2.23957e-07	3.16979e-06	Tubb2a				12117.1	2.40881	0.0643646	37.4244	1.56745e-306	2.23016e-304	Fam20c
		32566.1	1.01637	0.22377	4.54202	5.57166e-06	5.86616e-05	Ehf				15.1842	2.40056	0.599569	4.0038	6.23328e-05	0.000131995	Tspan6
		283.136	1.01635	0.169578	5.99342	2.05479e-09	3.99836e-08	Tmem80				57.6322	2.39809	0.335103	7.15628	8.28969e-13	2.94664e-12	Rnf223
		2705.13	1.01354	0.152867	6.63022	3.35184e-11	8.62245e-10	Atf6b				441.075	2.39704	0.399903	5.99406	2.04666e-09	5.96695e-09	Apol9b
		737.051	1.01136	0.126838	7.97363	1.54075e-15	7.1241e-14	Scfd2				32.098	2.39676	0.435095	5.5086	3.61702e-08	9.73476e-08	Prss33
		16560	1.01086	0.239896	4.21375	2.51161e-05	0.000229751	Loxl4				3509.68	2.39582	0.059789	40.0712	0	0	Asrgl1
		86.1364	1.00687	0.224537	4.48421	7.31846e-06	7.53865e-05	E230016K23Rik				3642.91	2.3916	0.0890216	26.8654	5.58104e-159	2.88044e-157	Plscr1
		1071.84	1.00661	0.261407	3.85072	0.000117769	0.000902741	Sdf2l1				33.0595	2.38907	0.408829	5.84368	5.10595e-09	1.45163e-08	Ptprz1
		221.542	1.00443	0.210694	4.76724	1.86771e-06	2.19605e-05	Klhdc8b				5172.2	2.38726	0.0587468	40.6364	0	0	Chka
		884.438	1.00302	0.164157	6.11014	9.95421e-10	2.01608e-08	Rasal1				6804.99	2.38634	0.0901107	26.4823	1.54845e-154	7.64208e-153	Shank2
		273.757	1.00222	0.197099	5.08485	3.67909e-07	5.02424e-06	5430403N17Rik				187.191	2.3807	0.178556	13.3331	1.48596e-40	1.47318e-39	Rasgef1b
		2799.19	1.0018	0.238039	4.20856	2.57006e-05	0.000234949	Rexo2				636.555	2.37965	0.117014	20.3364	6.12281e-92	1.53488e-90	Mcf2l
		13700.4	1.00074	0.199073	5.02701	4.98191e-07	6.5906e-06	Itfg3				57.8594	2.37814	0.312672	7.60585	2.83041e-14	1.08313e-13	Rbpms
		7723.65	0.999651	0.144427	6.9215	4.46882e-12	1.30879e-10	Hspa1b				198.776	2.37749	0.192865	12.3272	6.46509e-35	5.51015e-34	Prss53
		1748.03	0.999084	0.204077	4.89563	9.79938e-07	1.21374e-05	Pim3				41305.3	2.37394	0.0902941	26.2912	2.42014e-152	1.15822e-150	Plet1
		9512.15	0.99881	0.248755	4.01523	5.93875e-05	0.000489674	Pik3r1				16232.1	2.35562	0.0515865	45.6635	0	0	Ppp1r2
		177.045	0.995265	0.17874	5.56824	2.5732e-08	4.26298e-07	Klhl38				5791.66	2.34215	0.0597943	39.1702	0	0	Nupr1
		374.873	0.995108	0.207439	4.79712	1.60965e-06	1.91295e-05	9130409J20Rik				44140.2	2.33993	0.0915775	25.5514	5.29901e-144	2.33112e-142	Slpi
		664.127	0.99506	0.160162	6.21282	5.20429e-10	1.10707e-08	Cyb5rl				1347.11	2.33566	0.371738	6.28308	3.31936e-10	1.0197e-09	Ifit1
		3256.16	0.990893	0.208554	4.75126	2.02156e-06	2.36149e-05	Tmprss4				19.3847	2.32954	0.55845	4.17143	3.0269e-05	6.5764e-05	Tbx2
		219.333	0.990067	0.249147	3.97383	7.07274e-05	0.000573943	Alyref2				1427.57	2.32743	0.0967678	24.0517	8.01117e-128	3.10861e-126	Gulp1
		848.586	0.990014	0.211806	4.67415	2.95174e-06	3.3291e-05	Gmppb				796.045	2.32373	0.124159	18.7158	3.68149e-78	7.74192e-77	9130008F23Rik
		3168.97	0.989051	0.228554	4.32743	1.50862e-05	0.000145207	Atf5				1732.83	2.31709	0.0852283	27.1869	9.28313e-163	5.07296e-161	Rasal1
		5376.39	0.988642	0.135011	7.32269	2.43047e-13	8.4015e-12	Tcf7l1				26142	2.31322	0.0596188	38.8001	0	0	St6galnac2
		86.8797	0.988575	0.241584	4.09206	4.2756e-05	0.000371051	Pcdhb10				12973.3	2.3095	0.0762644	30.2828	1.93337e-201	1.54993e-199	Fbxo32
		588.435	0.98669	0.231628	4.2598	2.04608e-05	0.000190932	Cpne5				3722.44	2.30896	0.0802752	28.7631	6.21389e-182	4.14076e-180	Rnd3
		17629.2	0.9862	0.197833	4.98502	6.19548e-07	7.9974e-06	Tax1bp3				144861	2.30744	0.0513021	44.9775	0	0	Atp1a1
		2281.73	0.983114	0.132452	7.42244	1.1498e-13	4.10274e-12	Loxl3				365.338	2.29301	0.184956	12.3976	2.69286e-35	2.32015e-34	Hs3st3a1
		669.755	0.982038	0.131988	7.44036	1.00415e-13	3.60091e-12	Myzap				1010.47	2.28531	0.107232	21.3119	8.80772e-101	2.47951e-99	Adamts15
		1231.64	0.978688	0.232827	4.20349	2.62825e-05	0.000239356	Atp6v0e2				1078.48	2.2845	0.0967779	23.6056	3.3744e-123	1.25393e-121	Napepld
		7166.3	0.97639	0.10042	9.72306	2.40455e-22	2.24529e-20	Ajuba				5477.74	2.28304	0.0759478	30.0607	1.58171e-198	1.249e-196	Cd14
		492.562	0.97481	0.175937	5.54069	3.01278e-08	4.95695e-07	Ears2				33.8555	2.2816	0.400214	5.70094	1.19146e-08	3.30815e-08	B3galt5
		2098.18	0.973311	0.179505	5.4222	5.8871e-08	9.22183e-07	Efna3				7688.85	2.27051	0.0738606	30.7405	1.64026e-207	1.35626e-205	Tsc22d3
		2118.35	0.971904	0.240105	4.04782	5.16961e-05	0.000433211	BC031181				484.855	2.25723	0.133757	16.8756	6.8063e-64	1.10588e-62	Fjx1
		1441.03	0.971589	0.180394	5.38592	7.20737e-08	1.11085e-06	Xaf1				277.174	2.25095	0.175207	12.8474	8.89398e-38	8.21899e-37	Cd59a
		1375.39	0.971545	0.107926	9.00195	2.21749e-19	1.54794e-17	Polr3e				3300.67	2.24877	0.0807737	27.8404	1.4072e-170	8.48243e-169	Pim3
		2299.14	0.966866	0.209028	4.62553	3.73638e-06	4.09851e-05	Als2cl				4520.1	2.24721	0.0846546	26.5456	2.88484e-155	1.44636e-153	Usp53
		12986.5	0.966082	0.161534	5.98065	2.22243e-09	4.30128e-08	Krt6a				77578.8	2.24094	0.0931255	24.0636	6.01186e-128	2.33856e-126	Cbr2
		1155.98	0.960783	0.1569	6.12355	9.1515e-10	1.86137e-08	Fam84a				64367.2	2.23697	0.0405302	55.1926	0	0	Atp6v1a
		2837.93	0.960115	0.191094	5.02431	5.05245e-07	6.66127e-06	Tprn				3127.21	2.23357	0.0650675	34.3269	3.11582e-258	3.39366e-256	Rab4a
		13272.4	0.95986	0.238199	4.02965	5.58593e-05	0.000464042	Cyp1b1				5744.91	2.2323	0.0573458	38.9271	0	0	Galnt3
		1692.84	0.958724	0.154189	6.21786	5.03972e-10	1.07684e-08	Bysl				111.358	2.23164	0.230946	9.66304	4.32814e-22	2.3417e-21	Lipt2
		2970.13	0.95791	0.148566	6.44769	1.13565e-10	2.65264e-09	Cpq				158.674	2.22567	0.191817	11.603	3.97661e-31	3.00203e-30	Igfbp2
		27774.5	0.950523	0.210757	4.51005	6.48135e-06	6.74716e-05	Slc3a2				577.129	2.21867	0.125526	17.675	6.53188e-70	1.1912e-68	Mgll
		1803.54	0.947761	0.246348	3.84725	0.000119452	0.000911261	Cirbp				2732.24	2.21301	0.0789738	28.0221	8.74647e-173	5.37483e-171	Shpk
		479.901	0.947676	0.218625	4.3347	1.45957e-05	0.000140958	Slc25a38				1155.96	2.20834	0.088937	24.8304	4.20678e-136	1.72565e-134	Osgin1
		6499.12	0.945777	0.220703	4.2853	1.82497e-05	0.00017345	Sort1				6837.49	2.20281	0.0759893	28.9884	9.21165e-185	6.29782e-183	Plekhf1
		18016.7	0.945047	0.198943	4.75035	2.03066e-06	2.36828e-05	Sgk1				24.1768	2.20245	0.480654	4.5822	4.60114e-06	1.06548e-05	Ppp1r2-ps3
		1686.77	0.942844	0.146139	6.4517	1.10601e-10	2.59453e-09	Btn1a1				31.1826	2.19224	0.439367	4.98955	6.05198e-07	1.49599e-06	Nat1
		14078.5	0.940247	0.16671	5.64002	1.70034e-08	2.90046e-07	Pdia6				1117.29	2.18986	0.134868	16.2371	2.75868e-59	4.12965e-58	Wfdc12
		8025.42	0.939389	0.0873198	10.758	5.43201e-27	6.85196e-25	Atg12				20.5715	2.18854	0.504886	4.33472	1.45943e-05	3.25317e-05	Lingo1
		12583.8	0.938384	0.118366	7.92781	2.2305e-15	1.00547e-13	Hyou1				16.8812	2.18605	0.57723	3.78714	0.00015239	0.000311506	Mill1
		1061.19	0.938325	0.180122	5.20939	1.89461e-07	2.7109e-06	Ttc22				8915.13	2.17817	0.0784903	27.7508	1.70396e-169	1.01168e-167	Tlr3
		4068.62	0.935312	0.130327	7.17665	7.14409e-13	2.31378e-11	Trpv6				4371.54	2.17303	0.0726261	29.9208	1.05449e-196	8.20371e-195	Fgf1
		980.739	0.932805	0.107993	8.63765	5.73792e-18	3.52613e-16	Lzts3				1313.71	2.17041	0.0884113	24.549	4.42984e-133	1.7847e-131	Plekhb1
		1141.61	0.930829	0.170619	5.45558	4.8812e-08	7.73036e-07	Mief2				25.5679	2.165	0.473413	4.57316	4.8042e-06	1.11153e-05	Slco2b1
		5173.3	0.929174	0.155334	5.98178	2.20716e-09	4.27749e-08	Dnajb11				6198.75	2.16459	0.0927138	23.347	1.47942e-120	5.3222e-119	Itgb8
		2976.92	0.928891	0.205402	4.52232	6.11666e-06	6.40156e-05	Amotl2				291.385	2.15593	0.148538	14.5143	9.83895e-48	1.17361e-46	Mecom
		3611.8	0.928353	0.126285	7.35125	1.96369e-13	6.83725e-12	Fam188a				1113.65	2.15174	0.0838596	25.6589	3.36582e-145	1.51443e-143	Nudt7
		8097.69	0.927068	0.176754	5.24497	1.56308e-07	2.27041e-06	Fgfrl1				1852.89	2.14869	0.083264	25.8058	7.63581e-147	3.47528e-145	Tjp3
		497.571	0.925552	0.182106	5.08249	3.72514e-07	5.07268e-06	Ephb1				1463.04	2.14635	0.0781064	27.4799	3.05675e-166	1.76833e-164	Gramd1c
		17397.4	0.924586	0.179175	5.16025	2.46615e-07	3.47338e-06	Col6a2				2414.08	2.14461	0.0836664	25.6329	6.56559e-145	2.9291e-143	Zfp651
		1207.12	0.922301	0.212471	4.34084	1.41939e-05	0.000137291	Ccdc102a				580.357	2.13136	0.123606	17.2432	1.25968e-66	2.16005e-65	Abcg2
		3295.95	0.921282	0.110004	8.375	5.52241e-17	3.05432e-15	Zfp276				31.7732	2.12904	0.420687	5.06086	4.17372e-07	1.04149e-06	Orm2
		497.993	0.920555	0.238402	3.86135	0.000112762	0.000867352	Ocln				28496	2.12822	0.0668671	31.8276	2.68491e-222	2.38218e-220	Cited4
		2826.88	0.920524	0.126035	7.30372	2.79922e-13	9.58399e-12	Hes1				3377.5	2.12098	0.105767	20.0534	1.88366e-89	4.59793e-88	Cxcl1
		182.407	0.919688	0.231772	3.96807	7.24563e-05	0.000585349	Cdsn				6251.76	2.11915	0.055422	38.2366	0	0	Sik1
		1093.48	0.919179	0.159125	5.77645	7.62946e-09	1.38525e-07	2410002F23Rik				3137.8	2.11366	0.113624	18.6022	3.08254e-77	6.38878e-76	Slfn2
		511.853	0.918362	0.19852	4.62604	3.72722e-06	4.09851e-05	Slc17a9				5035.03	2.11161	0.092065	22.9361	2.02997e-116	7.03054e-115	Eya2
		38185.3	0.914881	0.21345	4.28616	1.81784e-05	0.000172888	Actn1				54.6609	2.10993	0.312055	6.76139	1.36672e-11	4.5614e-11	1700016C15Rik
		3577.2	0.914597	0.123469	7.40752	1.28684e-13	4.56909e-12	Tjap1				16.188	2.10956	0.581731	3.62635	0.000287457	0.000570973	Cpa4
		2666.29	0.913854	0.232397	3.9323	8.41376e-05	0.000667714	Tmem150a				1289.71	2.10836	0.0967231	21.7979	2.4305e-105	7.24244e-104	Aen
		582.874	0.912602	0.159069	5.73713	9.62915e-09	1.72652e-07	Dnajb5				198879	2.09741	0.0469202	44.7017	0	0	Fth1
		3622.08	0.909538	0.151943	5.98605	2.14999e-09	4.17232e-08	Nrbp2				11760.1	2.09701	0.069885	30.0065	8.06639e-198	6.33794e-196	Gpd1l
		14755.7	0.908317	0.153093	5.93311	2.97243e-09	5.69915e-08	Pttg1ip				1400.93	2.09594	0.0790872	26.5016	9.27727e-155	4.60742e-153	Gm7120
		950.479	0.907312	0.196454	4.61844	3.86639e-06	4.22483e-05	Ppa1				938.969	2.09103	0.102164	20.4675	4.19723e-93	1.06229e-91	Greb1l
		10690	0.906738	0.212602	4.26497	1.99933e-05	0.000187299	Ly6e				47.2742	2.08936	0.356692	5.85761	4.69589e-09	1.3377e-08	Ppp1r3e
		74.4916	0.90596	0.235041	3.85448	0.000115978	0.000889945	Tprg				218.057	2.08361	0.163285	12.7606	2.72232e-37	2.48662e-36	Car2
		182316	0.904864	0.114555	7.89893	2.81301e-15	1.26016e-13	Timp2				3263.44	2.08228	0.0781955	26.6292	3.11651e-156	1.57753e-154	Btg2
		13353.2	0.902537	0.203633	4.43216	9.32919e-06	9.36828e-05	Ppl				33108.2	2.07923	0.0571967	36.3522	2.42775e-289	3.16871e-287	1810011O10Rik
		1699.32	0.902096	0.189278	4.76599	1.87927e-06	2.20604e-05	Plscr1				11163.7	2.07767	0.058008	35.8169	6.03083e-281	7.441e-279	Tbc1d4
		667.053	0.901766	0.12764	7.06489	1.60741e-12	4.98157e-11	Chrnb1				138.771	2.07372	0.248533	8.34386	7.19026e-17	3.07406e-16	Pcdhb4
		3434.69	0.901048	0.116106	7.76054	8.45675e-15	3.56645e-13	Chpf2				11104.6	2.07151	0.0699035	29.6338	5.48197e-193	4.04564e-191	Edem3
		12922.4	0.896969	0.186339	4.81364	1.48203e-06	1.77449e-05	Gps1				363.144	2.06898	0.362224	5.71189	1.11729e-08	3.10987e-08	Oas1a
		1200.33	0.896738	0.203286	4.41122	1.02788e-05	0.00010229	Gjb3				20.6852	2.05988	0.499997	4.11977	3.79243e-05	8.1744e-05	Ly6g6e
		219.458	0.894332	0.17709	5.05015	4.41454e-07	5.91622e-06	AW011738				14244.1	2.05658	0.0520699	39.4965	0	0	Jade1
		6199.67	0.893316	0.218736	4.08399	4.4269e-05	0.000380734	Htra1				37.9364	2.05106	0.368849	5.5607	2.68689e-08	7.29859e-08	Podxl
		142.013	0.893236	0.230141	3.88126	0.000103917	0.000806873	2310001H17Rik				1413.49	2.05002	0.0862799	23.7601	8.63282e-125	3.26168e-123	Rrp12
		4989.11	0.889095	0.16946	5.24664	1.549e-07	2.25224e-06	Smim14				41.8554	2.04676	0.37394	5.4735	4.41243e-08	1.18071e-07	Serpinb9c
		39000.7	0.887365	0.169587	5.23251	1.67226e-07	2.41436e-06	Tsc22d1				98.2581	2.0463	0.375341	5.45185	4.98484e-08	1.32803e-07	Ifi27l2a
		986.251	0.885872	0.191789	4.61899	3.85619e-06	4.21688e-05	Tjp3				801.609	2.04364	0.103941	19.6616	4.6016e-86	1.07505e-84	Cystm1
		2943.96	0.881239	0.153821	5.729	1.01023e-08	1.80461e-07	Apmap				3688.27	2.03613	0.0569748	35.7374	1.03894e-279	1.25252e-277	Adcy9
		3612.35	0.878385	0.100876	8.7076	3.10377e-18	1.93213e-16	Pigk				6539.87	2.03608	0.0569809	35.7327	1.22812e-279	1.46937e-277	Cadm1
		4280.9	0.877091	0.108296	8.09904	5.53966e-16	2.70035e-14	Sumf1				488.654	2.03083	0.13371	15.1883	4.22662e-52	5.48939e-51	D7Ertd443e
		2621.72	0.876499	0.185506	4.72492	2.30206e-06	2.66535e-05	Maged2				3520.46	2.02658	0.0949987	21.3327	5.64177e-101	1.59392e-99	Heg1
		1659.96	0.87642	0.223889	3.91453	9.05808e-05	0.000711887	Slc9a3r2				2844.73	2.02309	0.105362	19.2012	3.61608e-82	7.99843e-81	Fam180a
		3574.39	0.876357	0.151668	5.77813	7.55345e-09	1.37666e-07	Pprc1				255.788	2.01092	0.2321	8.66402	4.554e-18	2.06492e-17	Sh3rf3
		4574.47	0.875075	0.09703	9.0186	1.90511e-19	1.34291e-17	Sh3tc2				181.044	2.00975	0.187126	10.7401	6.60053e-27	4.33079e-26	Mfsd2a
		4525.08	0.872316	0.178761	4.87978	1.06204e-06	1.30086e-05	Tprgl				260.472	2.00891	0.165397	12.146	6.02423e-34	5.02062e-33	Arhgdig
		2816.32	0.871518	0.173456	5.02444	5.04909e-07	6.66127e-06	Nol4l				109.158	2.00555	0.253454	7.91286	2.51551e-15	1.00652e-14	Aifm3
		179.444	0.871271	0.190779	4.56691	4.94956e-06	5.28786e-05	Spry1				4880.19	2.00457	0.0673	29.7856	6.0043e-195	4.58096e-193	Nbeal2
		5099.06	0.87074	0.226236	3.84882	0.000118689	0.00090688	Cdh13				20.2561	2.00216	0.536344	3.73297	0.000189234	0.000383248	Aldh1a7
		1795.66	0.870353	0.191344	4.54863	5.39961e-06	5.7177e-05	Rnd3				49.2573	2.00186	0.344672	5.80801	6.32215e-09	1.78679e-08	Car6
		874.31	0.868694	0.213026	4.07789	4.54471e-05	0.000389237	Fam118b				24.1506	1.99591	0.476418	4.1894	2.79691e-05	6.09599e-05	Adamtsl1
		245.423	0.860247	0.184721	4.65701	3.2083e-06	3.58751e-05	Rab20				4946.67	1.99263	0.0581836	34.2473	4.77918e-257	5.13453e-255	Cpq
		345.666	0.853322	0.15995	5.33492	9.55873e-08	1.44385e-06	Ccdc68				7977.85	1.99188	0.0555	35.8896	4.43145e-282	5.55443e-280	Fam84b
		767.696	0.852235	0.210093	4.05647	4.98209e-05	0.000419698	Gramd1c				1255.04	1.988	0.363308	5.47193	4.45171e-08	1.19082e-07	Col27a1
		849.276	0.848593	0.135182	6.2774	3.44273e-10	7.52377e-09	Tmem117				1886.96	1.98684	0.0748403	26.5477	2.72945e-155	1.37281e-153	Sema3e
		1256.69	0.844803	0.188793	4.47475	7.65004e-06	7.83682e-05	Bckdhb				26.1153	1.98662	0.458321	4.33456	1.46051e-05	3.25513e-05	Kank4os
		754.449	0.844747	0.13008	6.49404	8.35656e-11	2.00949e-09	Gm7120				664.656	1.98555	0.110448	17.9772	2.93867e-72	5.59161e-71	Pdzk1ip1
		211.188	0.843983	0.199642	4.22748	2.36326e-05	0.000217426	Vsig10l				2362.28	1.9772	0.0938948	21.0576	1.94845e-98	5.30549e-97	Prlr
		7534.72	0.84358	0.143475	5.87961	4.11222e-09	7.79101e-08	Tob2				1035.82	1.97521	0.0988315	19.9856	7.34452e-89	1.77629e-87	Cldn1
		1470.06	0.840791	0.176189	4.77209	1.8232e-06	2.14899e-05	Klf16				2889.79	1.96982	0.0940287	20.9492	1.90892e-97	5.11844e-96	Adgrg6
		853.974	0.8392	0.123658	6.78647	1.14907e-11	3.21471e-10	Igtp				940.831	1.96979	0.338488	5.81937	5.90682e-09	1.6721e-08	Apol9a
		2604.91	0.838547	0.14768	5.67813	1.36176e-08	2.37359e-07	Pccb				960.861	1.96757	0.41542	4.73633	2.17628e-06	5.1723e-06	Serpina3h
		961.713	0.836815	0.212319	3.94132	8.1035e-05	0.00064846	Cebpd				71.3125	1.96349	0.2963	6.62669	3.43308e-11	1.11929e-10	Scml4
		4699.21	0.833284	0.144208	5.77833	7.5445e-09	1.37666e-07	Letm1				6933.23	1.9608	0.0751764	26.0826	5.74544e-150	2.68455e-148	Rbm47
		343.769	0.832373	0.18053	4.61072	4.01268e-06	4.36808e-05	Wdr5b				58.4304	1.95475	0.323334	6.04562	1.48835e-09	4.3878e-09	Lmod1
		815.317	0.832025	0.203683	4.0849	4.40967e-05	0.000379707	Dhrs11				492.584	1.94795	0.159118	12.2422	1.84954e-34	1.56202e-33	8430408G22Rik
		9470.7	0.828324	0.0903914	9.16375	5.01233e-20	3.69627e-18	Degs1				54.0047	1.9464	0.326269	5.96564	2.43673e-09	7.06246e-09	Pdlim4
		863.251	0.828215	0.180004	4.60109	4.20277e-06	4.55089e-05	Slc25a45				5925.34	1.94012	0.0665473	29.154	7.42311e-187	5.18731e-185	Fam188a
		861.365	0.82769	0.192754	4.29402	1.75465e-05	0.000167431	Setd6				9262.05	1.9366	0.0904857	21.4023	1.27194e-101	3.63907e-100	Ctps
		11713.3	0.824361	0.13714	6.01108	1.84294e-09	3.59585e-08	Tspan3				828.262	1.93382	0.110363	17.5224	9.66974e-69	1.71975e-67	Gm14137
		4564.43	0.818467	0.106443	7.68925	1.48001e-14	5.95142e-13	Gart				72.7173	1.93039	0.279607	6.90393	5.05841e-12	1.72842e-11	Cdo1
		2805.74	0.817008	0.113734	7.18351	6.79458e-13	2.21054e-11	Gjb4				8329.68	1.92257	0.0655575	29.3265	4.77139e-189	3.44085e-187	Trp53bp2
		9636.96	0.814011	0.122163	6.66332	2.67709e-11	6.99937e-10	Ccnd1				11392.5	1.91946	0.0552182	34.7614	9.33815e-265	1.03131e-262	Ahcyl2
		340.868	0.812559	0.208811	3.89137	9.96796e-05	0.000776485	Ldhd				3158.37	1.91835	0.0660445	29.0464	1.70885e-185	1.17851e-183	Elovl7
		2662	0.811576	0.120164	6.75389	1.43929e-11	3.95737e-10	Socs2				19.0935	1.91433	0.526939	3.63292	0.000280233	0.000557466	Mfsd7c
		4277.16	0.809517	0.157213	5.14918	2.61633e-07	3.66694e-06	Rin3				673.961	1.91379	0.100564	19.0305	9.52521e-81	2.08066e-79	Pak6
		328.295	0.806991	0.183576	4.39595	1.10289e-05	0.000109	Tyw3				65.8971	1.91216	0.378303	5.05458	4.3133e-07	1.07479e-06	Slc2a6
		7283.47	0.804839	0.194031	4.148	3.35391e-05	0.000298449	Shisa5				1180.66	1.91139	0.0800149	23.8879	4.09094e-126	1.57581e-124	Slc24a3
		627.854	0.804205	0.164281	4.89529	9.81596e-07	1.21395e-05	Ficd				840.902	1.91055	0.108012	17.6883	5.16305e-70	9.4375e-69	Orai1
		6558.64	0.800646	0.123862	6.46402	1.01957e-10	2.39957e-09	Llgl2				4272.55	1.9083	0.0800453	23.8402	1.27895e-125	4.91445e-124	Vtcn1
		162.435	0.799626	0.207009	3.86277	0.00011211	0.000863957	Oas1b				2882.45	1.905	0.0648722	29.3654	1.51828e-189	1.10499e-187	Ppm1h
		5805.52	0.796873	0.144209	5.52581	3.27976e-08	5.36553e-07	Kcnk1				28692	1.9001	0.170136	11.1681	5.84144e-29	4.08022e-28	Sgk1
		645.256	0.794593	0.164755	4.82287	1.41504e-06	1.69853e-05	Txnrd3				37.0256	1.899	0.391003	4.85675	1.1933e-06	2.88735e-06	Rassf2
		1490.34	0.790862	0.11022	7.17528	7.21607e-13	2.33184e-11	C1galt1c1				21.9532	1.89809	0.477119	3.97823	6.94297e-05	0.000146415	Gm12359
		1216.08	0.78865	0.140584	5.60979	2.0257e-08	3.43104e-07	Pdp1				1893.72	1.89758	0.0670805	28.2881	4.8478e-176	3.09965e-174	Slc46a3
		15952.9	0.784804	0.135848	5.77708	7.6007e-09	1.38177e-07	Fgfr1				1706.58	1.89648	0.0728028	26.0495	1.36203e-149	6.34528e-148	Tmem229b
		865.662	0.781469	0.15997	4.88509	1.03381e-06	1.27062e-05	B4galt4				113.237	1.89644	0.331506	5.7207	1.06085e-08	2.96217e-08	Serpina3i
		1226.18	0.779921	0.181614	4.29439	1.75173e-05	0.000167264	Dph3				11580.4	1.8964	0.0867664	21.8564	6.7557e-106	2.03224e-104	Wfdc3
		2902.05	0.778793	0.12837	6.0668	1.30484e-09	2.60245e-08	Wdr77				10301.5	1.89211	0.0574949	32.9091	1.62872e-237	1.56844e-235	Sort1
		2419.27	0.776153	0.0915054	8.48205	2.21267e-17	1.27273e-15	Adpgk				22663	1.88771	0.0872256	21.6417	7.28068e-104	2.14522e-102	Fut9
		20638.4	0.772826	0.154054	5.01659	5.25967e-07	6.90092e-06	Hid1				2431.01	1.88752	0.111233	16.9691	1.38932e-64	2.28558e-63	Dusp1
		822.033	0.7728	0.14597	5.29422	1.19526e-07	1.77376e-06	Syde1				3142.26	1.87414	0.0697354	26.875	4.30958e-159	2.23151e-157	Fchsd2
		912.948	0.771625	0.14442	5.34292	9.14623e-08	1.38445e-06	Marveld2				1768.37	1.8738	0.355237	5.27479	1.32912e-07	3.43098e-07	Oasl2
		3804.2	0.771489	0.118784	6.4949	8.30906e-11	2.00141e-09	Slc39a11				638.799	1.86764	0.106426	17.5487	6.08338e-69	1.08559e-67	Slc25a33
		285.087	0.770715	0.15906	4.84542	1.26342e-06	1.52929e-05	Bmper				4856.95	1.86726	0.070422	26.5153	6.44996e-155	3.22355e-153	Atf5
		3339.02	0.769665	0.201055	3.82813	0.000129123	0.000978142	Bop1				711.785	1.86642	0.0945387	19.7423	9.33561e-87	2.20714e-85	Dmd
		13500.5	0.768258	0.13502	5.68994	1.27082e-08	2.23677e-07	Pam				3301.19	1.86617	0.084575	22.0653	6.8098e-108	2.11291e-106	Fgd4
		5473.9	0.767672	0.13698	5.60427	2.09138e-08	3.52568e-07	Fbln5				6972.28	1.8614	0.0689593	26.9927	1.7991e-160	9.56675e-159	Slc25a10
		1114.16	0.766569	0.166546	4.60274	4.16969e-06	4.51847e-05	Ccdc86				4843.34	1.85983	0.0674788	27.5617	3.2019e-167	1.87288e-165	Pitpnc1
		4319.74	0.76425	0.156643	4.87891	1.06672e-06	1.30438e-05	Nop56				5109.51	1.85912	0.0644792	28.8329	8.30557e-183	5.55805e-181	Gcnt1
		56807.4	0.764114	0.157786	4.84272	1.28071e-06	1.54762e-05	Brinp3				157.072	1.85895	0.198043	9.38658	6.19787e-21	3.18526e-20	Parm1
		302.977	0.762067	0.187827	4.05728	4.9648e-05	0.000418487	Fhod3				152.324	1.85846	0.221703	8.38266	5.17468e-17	2.22863e-16	Ntn1
		5434.44	0.760517	0.145776	5.21704	1.81809e-07	2.60919e-06	Rheb				1848.77	1.85782	0.0817221	22.7334	2.09604e-114	7.10359e-113	Ndufaf4
		320.33	0.760465	0.196595	3.86817	0.000109654	0.000846387	Ung				934.632	1.8549	0.111164	16.6862	1.65124e-62	2.61042e-61	Kctd14
		3048.74	0.76022	0.113222	6.71442	1.88817e-11	5.03745e-10	Rhbdd2				28.2723	1.85109	0.47937	3.86151	0.000112688	0.000233156	Rgag4
		20296.6	0.759403	0.086251	8.80457	1.31355e-18	8.60531e-17	Colgalt1				632.613	1.84988	0.113957	16.2331	2.94098e-59	4.39421e-58	Slc1a2
		20379.5	0.755154	0.168007	4.49479	6.96392e-06	7.19405e-05	Atp6ap1				5388.08	1.84905	0.0854742	21.6329	8.81084e-104	2.58642e-102	Nbea
		6379.95	0.752372	0.0914794	8.22449	1.96018e-16	1.00669e-14	Bhlhe41				3695.34	1.83959	0.0659837	27.8795	4.73577e-171	2.88772e-169	Cyr61
		1515.69	0.751452	0.164158	4.57762	4.70302e-06	5.05452e-05	Polr3d				83.5248	1.83909	0.294754	6.2394	4.39265e-10	1.34002e-09	Clca2
		10315.5	0.750069	0.184066	4.075	4.60143e-05	0.000393627	Traf4				2487.68	1.83175	0.251242	7.29077	3.08199e-13	1.11997e-12	Rtp4
		2588.58	0.748265	0.16463	4.54512	5.49032e-06	5.80094e-05	Srprb				4973.21	1.83125	0.08662	21.1412	3.32633e-99	9.20014e-98	Ccpg1
		168.877	0.748002	0.182093	4.10781	3.99428e-05	0.00034959	Rccd1				30.997	1.83085	0.433853	4.21998	2.44326e-05	5.34661e-05	Glod5
		2978.25	0.745554	0.098793	7.54663	4.4667e-14	1.66402e-12	Ndor1				12337.2	1.8303	0.194703	9.40048	5.43125e-21	2.79855e-20	Atg12
		13807.2	0.7433	0.176151	4.21969	2.44643e-05	0.00022436	Plscr3				311.345	1.82161	0.184181	9.8903	4.58671e-23	2.59634e-22	Trim30a
		494.629	0.742612	0.147392	5.03834	4.69584e-07	6.25821e-06	Fam110b				1922.27	1.82068	0.085983	21.1748	1.6294e-99	4.51459e-98	Slc25a35
		1027	0.742462	0.188578	3.93716	8.2451e-05	0.000655724	Sardh				634.243	1.81999	0.105146	17.3091	4.01508e-67	6.93766e-66	Fkbp11
		6076.24	0.742372	0.189539	3.91671	8.97639e-05	0.00070729	Smad3				104.874	1.81857	0.276012	6.58875	4.43559e-11	1.43577e-10	Cmpk2
		4548.49	0.738921	0.138559	5.33288	9.6666e-08	1.45861e-06	Nolc1				31.9905	1.8169	0.404602	4.49059	7.10272e-06	1.6217e-05	Atp8b5
		100556	0.737335	0.132481	5.56558	2.61284e-08	4.32367e-07	Col6a1				351.087	1.81442	0.134836	13.4564	2.82182e-41	2.8826e-40	Aif1l
		424.949	0.737318	0.151506	4.86658	1.13548e-06	1.38492e-05	Brsk1				21.7912	1.81345	0.506906	3.57749	0.000346909	0.000682793	Gzmm
		3087.32	0.737135	0.181041	4.07164	4.66827e-05	0.000397174	Cxcl16				230.299	1.80771	0.177984	10.1566	3.09842e-24	1.82792e-23	Gca
		2136.49	0.736609	0.116087	6.34532	2.2197e-10	4.95642e-09	Gnl3				221.257	1.79891	0.177348	10.1434	3.5454e-24	2.0846e-23	2810001G20Rik
		3051.88	0.735333	0.190468	3.86066	0.000113082	0.000869119	Map6				5364.17	1.79746	0.0630854	28.4924	1.4532e-178	9.523e-177	D8Ertd82e
		14495.1	0.731865	0.185476	3.94588	7.95069e-05	0.000637296	Pigt				4213.11	1.79688	0.0658324	27.2948	4.89071e-164	2.72929e-162	Chpt1
		6147.41	0.72902	0.143385	5.08435	3.68882e-07	5.03064e-06	Il17re				2402.36	1.7954	0.0677315	26.5076	7.91844e-155	3.94498e-153	C1galt1c1
		456.537	0.728329	0.177051	4.11366	3.89435e-05	0.000342126	Zmynd19				3122.35	1.79427	0.107642	16.6689	2.2065e-62	3.47084e-61	Mt2
		2240.12	0.728116	0.154654	4.70802	2.50135e-06	2.88448e-05	Chka				1627.58	1.79386	0.0858204	20.9025	5.0791e-97	1.35268e-95	Larp1b
		941.151	0.7269	0.134104	5.42041	5.94636e-08	9.27474e-07	Uba7				603.438	1.79275	0.123802	14.4809	1.60104e-47	1.90236e-46	Angpt1
		488.638	0.726779	0.14718	4.93804	7.89107e-07	9.98888e-06	Scamp5				84.5248	1.79257	0.300821	5.95891	2.5392e-09	7.35269e-09	Camk1d
		1071.11	0.72675	0.149632	4.8569	1.19235e-06	1.4506e-05	Tsr2				20237.3	1.79091	0.0523278	34.2248	1.03263e-256	1.10192e-254	Xbp1
		1067.44	0.726317	0.113143	6.41948	1.36743e-10	3.14619e-09	Spata5				26.4431	1.78924	0.461222	3.87935	0.000104734	0.000217412	Stkld1
		16374.1	0.725618	0.136707	5.30785	1.10926e-07	1.65641e-06	Ank				4502.04	1.78877	0.0654682	27.3228	2.27587e-164	1.27457e-162	Acsl1
		1378.22	0.723754	0.17626	4.10617	4.02276e-05	0.000351655	Yrdc				139.504	1.78677	0.199927	8.9371	3.99535e-19	1.90285e-18	Tmie
		587.201	0.721725	0.171657	4.20446	2.61703e-05	0.000238787	Entpd6				62.7114	1.784	0.294411	6.05955	1.36505e-09	4.03541e-09	Folr1
		3893.13	0.720987	0.142189	5.07064	3.96482e-07	5.35846e-06	Lfng				128.619	1.7833	0.201712	8.84084	9.50024e-19	4.4298e-18	Fam195a
		2486.55	0.720042	0.137496	5.23683	1.63359e-07	2.36329e-06	Rnase4				596.072	1.78103	0.115962	15.3587	3.09543e-53	4.11846e-52	Chac1
		9595.79	0.719292	0.132326	5.43576	5.4563e-08	8.59382e-07	Ildr1				20864.9	1.77834	0.0676674	26.2806	3.19842e-152	1.52146e-150	Slc39a14
		929.285	0.718134	0.142603	5.03591	4.75584e-07	6.33231e-06	Gpr180				4162.59	1.777	0.0715349	24.841	3.23354e-136	1.33335e-134	Lrch1
		1193.34	0.716555	0.143051	5.00907	5.46925e-07	7.14331e-06	Bag5				74.24	1.77679	0.281238	6.31775	2.65397e-10	8.19115e-10	Arhgdib
		1062.6	0.716026	0.178069	4.02107	5.7935e-05	0.000480176	Cebpa				927.752	1.77412	0.138081	12.8484	8.77907e-38	8.12231e-37	Ica1
		1165.73	0.714918	0.183377	3.89862	9.67433e-05	0.000755659	Gm20300				270.39	1.77388	0.198888	8.91899	4.70581e-19	2.23046e-18	Ifit3b
		1183.89	0.714456	0.141186	5.06039	4.18404e-07	5.62303e-06	Gprc5a				8140.91	1.76739	0.0686073	25.761	2.42605e-146	1.0947e-144	Pnpla2
		2747.38	0.713768	0.130015	5.48989	4.02194e-08	6.44047e-07	C2cd2l				1914.99	1.7633	0.080275	21.9658	6.12022e-107	1.87319e-105	Stk39
		7305.67	0.713593	0.134536	5.30409	1.13237e-07	1.68741e-06	Clptm1l				92.8886	1.76014	0.23009	7.64979	2.01316e-14	7.75647e-14	AI463170
		1019.78	0.711106	0.138515	5.13377	2.83999e-07	3.94962e-06	Exosc1				655.886	1.75408	0.147542	11.8887	1.3552e-32	1.08094e-31	Pcdhb9
		524.565	0.708832	0.166176	4.26554	1.9942e-05	0.000186992	Pusl1				3647.66	1.75066	0.07364	23.7732	6.32276e-125	2.40615e-123	Sesn1
		15063.1	0.706137	0.18464	3.82441	0.000131087	0.000990556	D17H6S56E-5				10135.7	1.74858	0.0785502	22.2607	8.87594e-110	2.80917e-108	Chst11
		23027.8	0.703776	0.126158	5.57854	2.4255e-08	4.04155e-07	Wls				125.357	1.7479	0.233758	7.47739	7.58108e-14	2.83648e-13	Tspan13
		1437.07	0.702384	0.128696	5.45768	4.824e-08	7.65663e-07	1600014C10Rik				22.9603	1.74131	0.481075	3.61963	0.000295028	0.000585275	Cyp2b19
		16611.3	0.701689	0.127603	5.499	3.81951e-08	6.15747e-07	Ctns				736.032	1.73919	0.109544	15.8766	9.19759e-57	1.31932e-55	Ocln
		16502.6	0.700976	0.170211	4.11829	3.81693e-05	0.000336527	Tacstd2				124.377	1.7328	0.298068	5.81342	6.12086e-09	1.73114e-08	Mrgprf
		2236.72	0.700166	0.145992	4.79593	1.61921e-06	1.92273e-05	Wnt7b				2802.88	1.73047	0.0877035	19.7309	1.17074e-86	2.75963e-85	Il1rn
		471.765	0.699459	0.170116	4.11167	3.92812e-05	0.000344429	Sox8				3185.32	1.72917	0.0667696	25.8976	7.08852e-148	3.26382e-146	1110008P14Rik
		929.666	0.699234	0.114679	6.09733	1.07852e-09	2.16609e-08	Tmem50b				6514.52	1.72321	0.0786716	21.9038	2.38883e-106	7.26913e-105	Arrdc4
		3923.78	0.696486	0.17498	3.98038	6.88039e-05	0.000559932	Zfp36				8181.83	1.71894	0.0722793	23.7819	5.13725e-125	1.95973e-123	Arrdc3
		3252.43	0.695364	0.133655	5.2027	1.96416e-07	2.79927e-06	Mthfd1				664.711	1.71867	0.105205	16.3364	5.43541e-60	8.24605e-59	Clec2e
		797.859	0.69181	0.120902	5.72208	1.0523e-08	1.87278e-07	Alg12				950.184	1.71659	0.0858904	19.9858	7.31605e-89	1.77212e-87	Myzap
		1673.25	0.686727	0.129102	5.31928	1.0418e-07	1.56542e-06	C87436				2241.57	1.71428	0.0710102	24.1413	9.21506e-129	3.61125e-127	Mthfd2
		6310.38	0.68654	0.105216	6.52506	6.79765e-11	1.65398e-09	Galnt10				3848.91	1.71005	0.0630102	27.1392	3.39826e-162	1.83797e-160	Chpf
		9356.56	0.686221	0.131097	5.23446	1.65469e-07	2.3914e-06	Nipal2				759.532	1.70945	0.350416	4.87833	1.06986e-06	2.60022e-06	Glul
		524.635	0.686123	0.150049	4.57266	4.81581e-06	5.16416e-05	Dph1				36754.5	1.69816	0.0602026	28.2075	4.73523e-175	2.99134e-173	Serinc3
		579.795	0.685687	0.120238	5.70274	1.17898e-08	2.0879e-07	C630043F03Rik				79098.9	1.69768	0.0682263	24.8831	1.13453e-136	4.71518e-135	Sulf2
		1980.04	0.685315	0.162322	4.22196	2.4219e-05	0.000222252	Smyd5				301.898	1.6972	0.223254	7.60208	2.91418e-14	1.11356e-13	Oas3
		594.148	0.685195	0.153884	4.45268	8.48047e-06	8.58193e-05	Ispd				1245.89	1.69618	0.0820998	20.6599	7.9509e-95	2.05513e-93	Marveld3
		16783.5	0.685145	0.0928538	7.37876	1.59772e-13	5.64502e-12	1810011O10Rik				2349.73	1.69553	0.0662521	25.592	1.87142e-144	8.30204e-143	Fdx1
		3056.65	0.684796	0.137999	4.96233	6.96537e-07	8.87962e-06	Slc5a9				1969.83	1.69506	0.086914	19.5027	1.04043e-84	2.39527e-83	Agmo
		1711.56	0.682713	0.173232	3.94103	8.11337e-05	0.000648528	Tlcd1				1724.13	1.69234	0.0710144	23.8309	1.59659e-125	6.12015e-124	Slc46a1
		2135.16	0.682246	0.152954	4.46047	8.17784e-06	8.29903e-05	Cyr61				1305.33	1.68828	0.0788911	21.4001	1.33335e-101	3.80789e-100	Srm
		2085.24	0.680298	0.136775	4.97383	6.56434e-07	8.43568e-06	Uba5				457.421	1.68784	0.11382	14.829	9.51968e-50	1.17456e-48	Il15
		998.905	0.680164	0.1488	4.57098	4.85441e-06	5.19393e-05	Tle2				169.911	1.68768	0.212774	7.93178	2.16031e-15	8.67033e-15	Pcdhb12
		5285.91	0.678668	0.129453	5.24256	1.58361e-07	2.29792e-06	Adamtsl4				142442	1.68693	0.0473737	35.6089	1.01914e-277	1.21017e-275	App
		19331.4	0.678354	0.0993625	6.82706	8.66701e-12	2.46795e-10	Rab15				515.246	1.68441	0.119443	14.1023	3.67814e-45	4.11686e-44	Echdc3
		886.957	0.67704	0.146733	4.6141	3.94806e-06	4.30752e-05	Suox				12328.8	1.6844	0.0695873	24.2055	1.94686e-129	7.66753e-128	Spns2
		5527.72	0.676991	0.155563	4.35189	1.34969e-05	0.000131316	Rab11b				964.154	1.6826	0.0845895	19.8913	4.84087e-88	1.16012e-86	Chrnb1
		973.015	0.676953	0.175979	3.84679	0.000119677	0.00091249	Ovca2				3616.18	1.67835	0.0661068	25.3885	3.37914e-142	1.45811e-140	Bid
		1322.58	0.67637	0.124363	5.43868	5.36782e-08	8.46374e-07	Recql				11831.3	1.67632	0.0943522	17.7667	1.28064e-70	2.37107e-69	Fibin
		1039.61	0.675917	0.172243	3.92422	8.70124e-05	0.00068825	Adck1				7216.88	1.67549	0.0573579	29.2111	1.40169e-187	9.83861e-186	Tlr4
		684.526	0.668	0.156168	4.27744	1.89057e-05	0.00017874	Rtn4ip1				5669.13	1.67382	0.200289	8.35704	6.43133e-17	2.75556e-16	Mdn1
		1221.34	0.665919	0.147717	4.50807	6.54195e-06	6.7972e-05	Agmo				25581	1.67065	0.055009	30.3705	1.34836e-202	1.08646e-200	Efr3a
		627.483	0.665252	0.122867	5.41439	6.14973e-08	9.57068e-07	Mir22hg				62728.3	1.66861	0.069101	24.1475	7.93818e-129	3.1186e-127	Slc38a2
		604.789	0.662893	0.148035	4.47795	7.53644e-06	7.741e-05	Setmar				271.437	1.66847	0.198258	8.41567	3.90662e-17	1.68941e-16	Vax2os
		3493.83	0.661843	0.0993783	6.65983	2.74139e-11	7.14151e-10	Acox2				3904.49	1.66829	0.0763164	21.8601	6.22395e-106	1.87586e-104	Grhl1
		3564.57	0.661736	0.120909	5.47303	4.42407e-08	7.05301e-07	Vac14				1348.99	1.66672	0.110438	15.0919	1.83145e-51	2.34393e-50	Fry
		2500.63	0.661234	0.145064	4.55821	5.15912e-06	5.49542e-05	Slc38a7				2922.46	1.66245	0.0761204	21.8397	9.73463e-106	2.91725e-104	Aspa
		4869.07	0.658379	0.0982016	6.70437	2.02283e-11	5.35696e-10	Med22				4460.49	1.6615	0.0576195	28.8358	7.63897e-183	5.13372e-181	Jade2
		884.207	0.657718	0.160509	4.09771	4.17266e-05	0.000363874	Nr4a1				100.486	1.66072	0.241473	6.87744	6.09362e-12	2.07272e-11	P2ry2
		1512.44	0.657544	0.150698	4.36332	1.28101e-05	0.000125142	Tmem110				68.0489	1.65981	0.289559	5.7322	9.91352e-09	2.77105e-08	BC021891
		6020.2	0.656671	0.149209	4.401	1.07752e-05	0.000106787	Atp6v0a1				7608.74	1.65861	0.101955	16.268	1.66488e-59	2.50413e-58	Gda
		2450.16	0.655877	0.117706	5.57216	2.51603e-08	4.17308e-07	Slc9a8				28.5183	1.65651	0.445136	3.72137	0.000198148	0.000400409	Olfr920
		395.365	0.655571	0.154225	4.25073	2.13073e-05	0.000198199	Pycr1				166.746	1.65622	0.196385	8.43354	3.35367e-17	1.45627e-16	Rgs7
		792.131	0.655435	0.118524	5.52996	3.20305e-08	5.24599e-07	Ddx31				15571.8	1.65166	0.0586413	28.1655	1.54907e-174	9.74681e-173	Map2
		63648.7	0.653902	0.104207	6.27502	3.49584e-10	7.61668e-09	Atp1a1				1957.99	1.65053	0.0684215	24.123	1.43357e-128	5.59022e-127	Rab3a
		2808.54	0.652028	0.152335	4.28023	1.86701e-05	0.000176978	Zfp672				210.298	1.64809	0.196805	8.37418	5.56087e-17	2.39039e-16	Card14
		2510.25	0.648308	0.138312	4.68728	2.76855e-06	3.15465e-05	Prickle1				86.1624	1.6468	0.263278	6.25497	3.97587e-10	1.21617e-09	Triqk
		5860.73	0.647648	0.155284	4.17074	3.03611e-05	0.000273555	Atp6v1h				240.79	1.64648	0.152123	10.8234	2.66812e-27	1.77871e-26	Fam187b
		606.598	0.645966	0.151183	4.27275	1.93079e-05	0.000182038	Snhg17				729.972	1.64316	0.126607	12.9784	1.62208e-38	1.52372e-37	Sox8
		887.798	0.641732	0.117982	5.43925	5.35048e-08	8.44565e-07	Wfs1				37.6092	1.64072	0.364062	4.50669	6.58465e-06	1.50625e-05	Pdzd3
		2744.99	0.640832	0.130176	4.9228	8.53133e-07	1.06865e-05	Fam3c				1812.96	1.63967	0.106289	15.4265	1.08603e-53	1.45972e-52	Man1a
		6729.27	0.640369	0.156688	4.08692	4.37142e-05	0.000377544	Serpinh1				459.794	1.63799	0.17891	9.15537	5.41713e-20	2.67938e-19	Tmod2
		981.344	0.640267	0.131501	4.86893	1.12206e-06	1.36971e-05	Sox13				328.136	1.63714	0.136044	12.0339	2.35898e-33	1.92434e-32	Ufsp1
		11217.5	0.638876	0.144399	4.42438	9.67191e-06	9.69213e-05	Anxa11				7073.64	1.63615	0.0496148	32.9771	1.73161e-238	1.6881e-236	Smim14
		13523.8	0.635587	0.0854031	7.4422	9.90201e-14	3.55977e-12	Pdia4				4932.9	1.63549	0.0725535	22.5419	1.61192e-112	5.32574e-111	Frk
		5222.33	0.63542	0.109899	5.78183	7.38904e-09	1.35012e-07	Cdc42ep4				3251.74	1.63202	0.0630885	25.8688	1.49538e-147	6.86525e-146	41522
		414.758	0.634697	0.152058	4.17405	2.99229e-05	0.000269945	Slc25a26				758.059	1.63154	0.135853	12.0096	3.16255e-33	2.56529e-32	Lgals9
		756.807	0.63414	0.163913	3.86877	0.000109387	0.000845236	Tm2d1				111.897	1.62655	0.223131	7.28964	3.10774e-13	1.12881e-12	Robo2
		14829.6	0.632486	0.149299	4.23637	2.27164e-05	0.000210072	Smo				20186.1	1.61279	0.0630768	25.5688	3.39678e-144	1.49847e-142	Ube2h
		26990.9	0.631208	0.109684	5.75479	8.67495e-09	1.56323e-07	Foxc1				4134.62	1.6112	0.0605384	26.6146	4.60494e-156	2.32351e-154	Apmap
		1494.9	0.628916	0.0969944	6.48405	8.92943e-11	2.12591e-09	Utp23				458.86	1.61045	0.121133	13.2949	2.47872e-40	2.44055e-39	Ralgps1
		945.48	0.627398	0.153694	4.08212	4.46263e-05	0.000382966	Slc25a22				2052.95	1.6104	0.0828171	19.4453	3.19388e-84	7.29971e-83	Wnt4
		3140.85	0.627357	0.144454	4.34296	1.40578e-05	0.000136313	Abtb2				4919.49	1.60842	0.0587595	27.3729	5.76276e-165	3.27379e-163	Abtb2
		2392.45	0.626999	0.109318	5.73554	9.7204e-09	1.74071e-07	2310030G06Rik				13945	1.60823	0.0583454	27.5639	3.01591e-167	1.77064e-165	Ckmt1
		572.113	0.626978	0.127255	4.92693	8.35322e-07	1.04999e-05	Limk1				197.188	1.60478	0.17843	8.99392	2.38576e-19	1.14628e-18	5730508B09Rik
		10129.8	0.626764	0.101907	6.15035	7.73118e-10	1.59048e-08	Pygb				1020.69	1.60264	0.0921363	17.3943	9.12037e-68	1.58982e-66	Kalrn
		2720.81	0.625581	0.143228	4.36773	1.25545e-05	0.000122812	Kctd1				2324.46	1.60165	0.0697896	22.9496	1.48637e-116	5.15916e-115	Slc9a3r2
		8144.98	0.624513	0.147115	4.24506	2.18533e-05	0.000202742	Ipo13				711.865	1.59763	0.102128	15.6435	3.68042e-55	5.11213e-54	Pradc1
		5751.99	0.624355	0.122545	5.09492	3.48884e-07	4.77351e-06	Eif1a				3471.96	1.59661	0.0723859	22.0569	8.20092e-108	2.53955e-106	Tenm4
		796.774	0.62359	0.136853	4.55664	5.19778e-06	5.5325e-05	Elac1				103.239	1.59028	0.243326	6.53557	6.33665e-11	2.03156e-10	Il18bp
		232.45	0.621858	0.162241	3.83292	0.00012663	0.000961931	Magi2				10466.5	1.58994	0.0584225	27.2145	4.3717e-163	2.40565e-161	Shisa5
		5851.32	0.621543	0.149173	4.1666	3.0917e-05	0.000277866	Scamp2				865.669	1.58609	0.126256	12.5625	3.39444e-36	3.01002e-35	Hsd17b7
		2321.83	0.621414	0.121683	5.10685	3.27574e-07	4.50766e-06	Rrs1				464.82	1.58577	0.373251	4.24853	2.15174e-05	4.7303e-05	Chadl
		2491.61	0.620937	0.142319	4.36298	1.28301e-05	0.000125253	Tsr1				291.031	1.58485	0.14025	11.3001	1.30995e-29	9.39936e-29	Dtna
		2511.24	0.620485	0.157044	3.95103	7.78143e-05	0.000625122	Unc50				22860.1	1.58194	0.0495587	31.9205	1.38766e-223	1.23816e-221	Smo
		10616.6	0.616891	0.131152	4.70364	2.5556e-06	2.93761e-05	Inhbb				34.0505	1.58194	0.388798	4.06879	4.72588e-05	0.000101023	Ppp1r3c
		315.978	0.616532	0.131843	4.67625	2.92173e-06	3.30302e-05	Gm53				783.006	1.58082	0.342128	4.62057	3.82693e-06	8.92479e-06	Isg15
		1602.91	0.615252	0.117945	5.21644	1.82399e-07	2.61505e-06	St7				4273.2	1.58075	0.0563203	28.0672	2.46201e-173	1.51885e-171	Prkab1
		4871.15	0.613463	0.111726	5.4908	4.00126e-08	6.42885e-07	Nt5c2				3798.43	1.57766	0.0639033	24.6882	1.43201e-134	5.7989e-133	Sgsm3
		744.792	0.610712	0.138992	4.39387	1.11348e-05	0.000109919	Arsk				261.106	1.57343	0.173293	9.07956	1.09016e-19	5.32045e-19	Gm3336
		1780.49	0.610554	0.1168	5.22736	1.71949e-07	2.48007e-06	Ccdc25				393.272	1.57101	0.15965	9.84035	7.54504e-23	4.23149e-22	Epha4
		969.967	0.610055	0.109146	5.58935	2.27922e-08	3.81551e-07	Pald1				9444.81	1.57068	0.0537276	29.2342	7.13345e-188	5.0294e-186	Per1
		1610.23	0.609832	0.128291	4.75352	1.99907e-06	2.33902e-05	Aasdhppt				5844.78	1.56844	0.0615039	25.5014	1.90129e-143	8.29478e-142	Zfp36
		3684.65	0.609218	0.133164	4.57496	4.76306e-06	5.11141e-05	Trappc9				261.452	1.56788	0.179616	8.72906	2.56793e-18	1.1762e-17	Prkaa2
		17055.2	0.608174	0.146323	4.15638	3.23329e-05	0.000288967	Tmem59				1134.96	1.5639	0.0996117	15.7	1.51229e-55	2.11735e-54	Hps3
		1028.71	0.607959	0.119971	5.06753	4.03004e-07	5.4313e-06	Enoph1				223.015	1.5614	0.158928	9.82456	8.82548e-23	4.93034e-22	Fn3k
		17462.1	0.607851	0.0990929	6.13415	8.56136e-10	1.75875e-08	Fkbp9				461.457	1.56089	0.139148	11.2175	3.34636e-29	2.35933e-28	Tmem51
		16266.9	0.607102	0.149054	4.07303	4.6405e-05	0.000395088	Rarg				2670.8	1.55601	0.0842207	18.4754	3.26093e-76	6.60256e-75	Zhx3
		13643.1	0.604831	0.125303	4.82695	1.38638e-06	1.6669e-05	Maea				319.27	1.55555	0.143436	10.845	2.10738e-27	1.41085e-26	Shisa4
		11466.2	0.604534	0.106502	5.67627	1.37662e-08	2.39659e-07	Eif4a2				7240.85	1.552	0.0849917	18.2607	1.70251e-74	3.36939e-73	Id2
		3540.77	0.603722	0.155485	3.88283	0.000103248	0.00080254	Dgcr8				7911.51	1.55104	0.047929	32.3612	9.6513e-230	8.81058e-228	Bcl2l1
		1466.18	0.603556	0.135822	4.44373	8.84113e-06	8.92805e-05	Pcca				2378	1.54775	0.0987578	15.6722	2.34336e-55	3.2751e-54	Slc30a1
		8532.78	0.601414	0.125657	4.78616	1.69999e-06	2.01532e-05	Nudt4				333.782	1.54734	0.162994	9.49327	2.23908e-21	1.17598e-20	Gm15987
		7104.94	0.601387	0.157101	3.82803	0.000129172	0.000978142	Mat2a				9941.39	1.54725	0.080316	19.2645	1.0665e-82	2.37563e-81	Hspa1b
		1245.19	0.599408	0.153606	3.90224	9.53079e-05	0.000745662	Foxred1				717.667	1.54227	0.0957468	16.1078	2.24738e-58	3.30473e-57	Gfod1
		1171.75	0.598751	0.149162	4.01409	5.96753e-05	0.000491484	Inafm2				3886.71	1.54217	0.0876489	17.5948	2.69933e-69	4.84438e-68	Dcxr
		563.614	0.597503	0.155994	3.8303	0.000127987	0.000970705	Fzd8				84594.7	1.54143	0.0676995	22.7687	9.35829e-115	3.19213e-113	Sparc
		1063.33	0.597124	0.0994857	6.00211	1.9477e-09	3.79511e-08	Gm6548				22515.9	1.53802	0.0564052	27.2674	1.03468e-163	5.73356e-162	Fgfr1
		446.842	0.596044	0.145537	4.09549	4.21277e-05	0.000366483	Crispld2				277.614	1.53757	0.142151	10.8164	2.87764e-27	1.91515e-26	Syde2
		2328.84	0.595624	0.148992	3.9977	6.39611e-05	0.000524379	Tap2				209.42	1.53677	0.170746	9.00032	2.25063e-19	1.08366e-18	Slc18a1
		4748.55	0.594897	0.106209	5.60121	2.12865e-08	3.58432e-07	Kansl2				153.771	1.53473	0.206676	7.42575	1.12142e-13	4.15546e-13	Gbp6
		5924.53	0.591577	0.0925733	6.39037	1.65488e-10	3.76537e-09	Ipo4				5788.16	1.53438	0.0603418	25.4281	1.23292e-142	5.34933e-141	Sumf1
		105467	0.589645	0.145556	4.05099	5.10017e-05	0.00042839	Cd24a				1159.45	1.53418	0.279781	5.48349	4.17017e-08	1.11816e-07	Gbp3
		1183.3	0.586773	0.103285	5.68108	1.33847e-08	2.34437e-07	N6amt1				15552.9	1.53075	0.0512064	29.8936	2.38236e-196	1.84435e-194	Taldo1
		3371.51	0.586311	0.137932	4.25072	2.13085e-05	0.000198199	Slc20a2				32.39	1.52959	0.381962	4.00455	6.21347e-05	0.000131598	Abca9
		7407.61	0.585989	0.126535	4.63104	3.63832e-06	4.01528e-05	Rgs12				1088.95	1.52802	0.0940608	16.245	2.42386e-59	3.63189e-58	Gab2
		6003.71	0.585756	0.116586	5.02426	5.05385e-07	6.66127e-06	4833439L19Rik				275.212	1.52466	0.147849	10.3123	6.20296e-25	3.76348e-24	Kbtbd8
		1189.48	0.585643	0.102978	5.68706	1.29248e-08	2.26656e-07	Cds1				10538.6	1.52348	0.0661494	23.0309	2.28748e-117	8.04592e-116	Pdcd4
		4486.7	0.582913	0.110676	5.26687	1.38772e-07	2.04683e-06	Tm9sf1				3910.12	1.52347	0.0920117	16.5573	1.41782e-61	2.18669e-60	Amotl2
		856.364	0.582166	0.139848	4.16285	3.14301e-05	0.000281598	A930004D18Rik				16451	1.52271	0.0540812	28.156	2.02135e-174	1.26679e-172	Hyou1
		18817.5	0.581895	0.132819	4.3811	1.18079e-05	0.000116006	Rpn1				240.394	1.52233	0.152336	9.99326	1.63133e-23	9.37878e-23	Smim1
		13537	0.578307	0.122391	4.72509	2.30009e-06	2.66521e-05	Itfg1				350.726	1.52012	0.155723	9.76169	1.64396e-22	9.10983e-22	Gnai1
		2156.2	0.577458	0.138685	4.1638	3.1299e-05	0.000280773	Pno1				2608.76	1.51889	0.0715514	21.228	5.26985e-100	1.46784e-98	Tmem64
		650.6	0.574347	0.14229	4.03646	5.42634e-05	0.000451929	Trub1				40.2065	1.51674	0.349883	4.335	1.45759e-05	3.24955e-05	Zfp773
		4475.42	0.573221	0.123926	4.62552	3.73654e-06	4.09851e-05	Fam102a				241.565	1.51547	0.183614	8.25355	1.53762e-16	6.50513e-16	Plcb1
		3852.44	0.571104	0.122569	4.65943	3.17081e-06	3.54835e-05	Ublcp1				156.256	1.51433	0.225569	6.71336	1.90188e-11	6.28902e-11	Atp13a4
		742.357	0.571016	0.135822	4.20415	2.62064e-05	0.000238966	Marveld3				4293.39	1.51414	0.0697612	21.7047	1.85376e-104	5.5031e-103	Mpv17l2
		9552.3	0.570746	0.0864218	6.60419	3.99695e-11	1.01548e-09	Ergic1				767.026	1.51391	0.0983668	15.3905	1.89585e-53	2.53739e-52	Dnajb5
		2692.3	0.570436	0.145722	3.91456	9.05695e-05	0.000711887	Dirc2				7233.1	1.5139	0.0711427	21.2798	1.74864e-100	4.9052e-99	Ppargc1a
		940.568	0.568351	0.127133	4.47051	7.80341e-06	7.96968e-05	2810013P06Rik				8485.53	1.51363	0.0642223	23.5685	8.10567e-123	2.99095e-121	Dnajc3
		919.367	0.567842	0.141673	4.00812	6.12046e-05	0.000503503	Mycn				17639.3	1.51274	0.058679	25.78	1.48588e-146	6.72392e-145	Gnaq
		1366.16	0.567792	0.121504	4.67304	2.96769e-06	3.33662e-05	Rbm48				5368.76	1.51168	0.0516564	29.2642	2.96237e-188	2.11696e-186	Cracr2b
		2690.47	0.565511	0.120618	4.68843	2.75315e-06	3.14208e-05	Nop2				2709.76	1.5108	0.0669768	22.557	1.14618e-112	3.81087e-111	BC031181
		6010.81	0.563601	0.135743	4.15196	3.29644e-05	0.000294062	Rcn2				947.59	1.50641	0.0913954	16.4823	4.9171e-61	7.54673e-60	Plekhh1
		1813.8	0.559567	0.115728	4.83518	1.33022e-06	1.60206e-05	Ltv1				373.225	1.50407	0.117994	12.747	3.23958e-37	2.95396e-36	Timm10
		2260.18	0.559158	0.144131	3.87952	0.000104662	0.000812219	Prss8				728.443	1.50386	0.120927	12.4361	1.66521e-35	1.44657e-34	Pinx1
		12466.6	0.558853	0.106448	5.25001	1.52092e-07	2.22039e-06	Srpr				240.926	1.50371	0.149029	10.0901	6.11277e-24	3.56495e-23	4930451G09Rik
		1264.92	0.557627	0.120293	4.63556	3.5598e-06	3.94375e-05	Shmt1				18504.1	1.503	0.0680367	22.091	3.86014e-108	1.20481e-106	Surf4
		1211.27	0.55517	0.130235	4.26283	2.01852e-05	0.000188483	Prmt3				533.576	1.50218	0.118065	12.7234	4.38394e-37	3.98134e-36	Gpr160
		5267.47	0.554789	0.124252	4.46503	8.00572e-06	8.14736e-05	Pon2				1334.82	1.4997	0.0776299	19.3186	3.74471e-83	8.38869e-82	Tmem50b
		7716.67	0.554545	0.137948	4.01996	5.82071e-05	0.000482153	Ddx24				54812.6	1.49959	0.0726919	20.6295	1.4933e-94	3.83473e-93	Sec14l1
		2014.75	0.552982	0.120773	4.57869	4.67894e-06	5.0324e-05	Eny2				9489.16	1.49756	0.0804413	18.6168	2.35023e-77	4.88385e-76	Dclk1
		5540.19	0.551278	0.11474	4.80457	1.55081e-06	1.84915e-05	Tspan9				1483.13	1.49728	0.0758779	19.7328	1.12828e-86	2.66352e-85	Lppr4
		5387.77	0.548678	0.104176	5.26686	1.3878e-07	2.04683e-06	Hsd17b4				423.078	1.49708	0.134397	11.1393	8.07858e-29	5.62296e-28	Fhod3
		367.022	0.547592	0.138261	3.96056	7.47738e-05	0.000603055	Trmt61b				31.9814	1.49648	0.40257	3.71731	0.000201358	0.0004065	Pappa2
		4484.03	0.545317	0.123257	4.42422	9.67894e-06	9.69242e-05	Tmem248				8104.67	1.49474	0.0549598	27.1969	7.0641e-163	3.87373e-161	Tcn2
		6626.51	0.544592	0.086134	6.32262	2.57173e-10	5.69823e-09	Ppp1r2				125.7	1.48834	0.227425	6.54429	5.97794e-11	1.92085e-10	Sptb
		2385.8	0.544145	0.0960635	5.66443	1.47516e-08	2.55576e-07	Pdgfa				9596.83	1.48678	0.0517341	28.7389	1.24799e-181	8.2813e-180	Herpud1
		7670.66	0.54383	0.121286	4.48388	7.32984e-06	7.54496e-05	AI661453				2507.37	1.48487	0.0660559	22.479	6.66396e-112	2.16998e-110	Zfp503
		2529.23	0.543408	0.117468	4.62602	3.7276e-06	4.09851e-05	Utp18				33152.2	1.48441	0.0851847	17.4258	5.25722e-68	9.21502e-67	Plod2
		4239.05	0.541598	0.0878758	6.16322	7.12787e-10	1.47693e-08	Tle1				15804.6	1.48417	0.0763856	19.43	4.3035e-84	9.77916e-83	Tspan3
		3533.85	0.541569	0.115662	4.68233	2.83627e-06	3.2216e-05	Sgsh				326.68	1.48019	0.153148	9.6651	4.24203e-22	2.29669e-21	Pcdhb14
		9938.68	0.540988	0.121082	4.46795	7.89728e-06	8.05411e-05	Psme3				33095.3	1.48019	0.0436498	33.9105	4.6626e-252	4.84451e-250	Tfrc
		2373.46	0.540049	0.132186	4.08553	4.3977e-05	0.000379357	Gdpd5				3401.77	1.47674	0.0674864	21.882	3.85618e-106	1.16668e-104	Ppp1r13b
		1258.03	0.540006	0.13113	4.11808	3.8204e-05	0.000336626	Wdr4				3243.19	1.47556	0.0666189	22.1492	1.06123e-108	3.33199e-107	Ubxn2a
		5769.65	0.539453	0.137693	3.91781	8.93584e-05	0.000704867	Tesk1				16445.7	1.47413	0.0756254	19.4926	1.26978e-84	2.91477e-83	Cryab
		4895.06	0.539233	0.112721	4.78378	1.72025e-06	2.03598e-05	Crlf3				1978.74	1.47347	0.0835305	17.6399	1.21754e-69	2.19504e-68	Spry2
		3091.13	0.538263	0.102309	5.26114	1.43168e-07	2.10507e-06	Fam98a				1288.74	1.47294	0.0754293	19.5274	6.42503e-85	1.48349e-83	Wfs1
		5807.21	0.538032	0.094099	5.71772	1.07964e-08	1.91669e-07	Sh3bp2				1479.02	1.4717	0.0747591	19.6859	2.84992e-86	6.66796e-85	Wdfy2
		2341.34	0.532822	0.131566	4.04985	5.12501e-05	0.00042987	Cr1l				6020.99	1.46959	0.0654942	22.4384	1.66021e-111	5.3729e-110	Rfk
		27356.7	0.532225	0.123925	4.29474	1.74899e-05	0.000167113	9530068E07Rik				1666.93	1.46908	0.0695281	21.1292	4.28371e-99	1.17657e-97	Bckdhb
		8333.41	0.530433	0.0865918	6.12567	9.03011e-10	1.8445e-08	Txndc5				653.054	1.46684	0.0968487	15.1457	8.09212e-52	1.04241e-50	Ccdc101
		1026.05	0.529969	0.122386	4.3303	1.48905e-05	0.000143584	Gyltl1b				252.378	1.46623	0.148983	9.84161	7.45125e-23	4.18038e-22	Dyrk3
		5829.61	0.529747	0.11745	4.51039	6.47075e-06	6.74271e-05	Erp44				4874.91	1.466	0.08793	16.6723	2.0842e-62	3.28174e-61	Pcx
		984.523	0.529119	0.126944	4.16812	3.07119e-05	0.000276369	Pus3				1433.42	1.46552	0.0956835	15.3163	5.95257e-53	7.86686e-52	Mia
		3197.63	0.528954	0.100967	5.2389	1.61538e-07	2.33929e-06	Hacd3				169.937	1.46372	0.197333	7.41749	1.19363e-13	4.41681e-13	Muc20
		18577.8	0.524165	0.126697	4.13714	3.51662e-05	0.000311962	Tm9sf2				26439.3	1.45714	0.0854109	17.0604	2.9273e-65	4.87667e-64	Steap4
		1287.61	0.523829	0.123315	4.2479	2.15785e-05	0.000200452	Ippk				128.164	1.45694	0.199272	7.31128	2.64612e-13	9.64464e-13	Pcdhgb1
		3367.93	0.521312	0.133175	3.91449	9.05948e-05	0.000711887	Cacybp				2491.19	1.45687	0.0705996	20.6356	1.31452e-94	3.38666e-93	Vimp
		8544.48	0.520281	0.118933	4.37456	1.2168e-05	0.000119274	Pgrmc1				430.715	1.45553	0.112922	12.8897	5.14253e-38	4.77741e-37	Prune2
		2715.63	0.518877	0.127617	4.0659	4.78471e-05	0.000405446	Lrrc1				503.604	1.44895	0.132565	10.9301	8.27413e-28	5.6252e-27	Cpeb3
		1194.65	0.518754	0.110819	4.68108	2.85371e-06	3.23886e-05	P3h1				4748.3	1.44745	0.0699645	20.6883	4.41157e-95	1.14404e-93	Ggta1
		4068	0.518545	0.10882	4.76516	1.88709e-06	2.21223e-05	Nup93				8303.57	1.44705	0.0744289	19.4421	3.40289e-84	7.76616e-83	Eif1a
		1276.66	0.516614	0.128165	4.03083	5.55794e-05	0.000462251	Dusp1				5743.2	1.4469	0.0690447	20.956	1.65401e-97	4.44247e-96	Enpp5
		1819.39	0.514752	0.126337	4.07444	4.61261e-05	0.000393753	Fam220a				13152.6	1.44682	0.0581539	24.8791	1.25274e-136	5.19279e-135	Nipal2
		6031.82	0.514361	0.0954676	5.3878	7.13235e-08	1.10046e-06	Nomo1				4750.84	1.4442	0.0667201	21.6456	6.68017e-104	1.97196e-102	Trib1
		1941.83	0.513142	0.106729	4.80791	1.52518e-06	1.82011e-05	Nck1				5573.09	1.44406	0.0640568	22.5434	1.5599e-112	5.16467e-111	Klf9
		1140.93	0.512263	0.129686	3.95004	7.81379e-05	0.000627022	Stk40				539.144	1.44352	0.115239	12.5263	5.36156e-36	4.7331e-35	Sfxn2
		1532.96	0.51127	0.106153	4.81634	1.46212e-06	1.75211e-05	Pwp2				10491.1	1.44312	0.0644311	22.3979	4.12725e-111	1.32753e-109	Slc7a1
		1346.02	0.506657	0.107114	4.73008	2.24435e-06	2.60692e-05	Gnpnat1				16140.9	1.44189	0.0453079	31.8241	3.00032e-222	2.64715e-220	Fads2
		2969.84	0.504265	0.123195	4.09323	4.25396e-05	0.000369515	Fam193b				1130.6	1.43841	0.08113	17.7297	2.47369e-70	4.54796e-69	Deb1
		10753.3	0.502906	0.124801	4.02968	5.5853e-05	0.000464042	St6galnac2				17518.3	1.43746	0.0611222	23.5179	2.67878e-122	9.81577e-121	Tob1
		1909.89	0.502388	0.123552	4.0662	4.77867e-05	0.000405172	Fbxw7				12674.1	1.43531	0.0561974	25.5406	6.98618e-144	3.0648e-142	Gmds
		11669.7	0.497963	0.0968258	5.14287	2.70569e-07	3.77379e-06	Srsf6				47.4095	1.43365	0.324984	4.41144	1.02686e-05	2.3151e-05	Slco1a5
		686.018	0.497128	0.125677	3.95561	7.63392e-05	0.00061499	Zdhhc24				86.0813	1.43292	0.247388	5.7922	6.94704e-09	1.95989e-08	Ppil6
		1874.23	0.495741	0.0987267	5.02135	5.13107e-07	6.74449e-06	Bpnt1				107.546	1.43227	0.229115	6.25132	4.07e-10	1.24424e-09	9930014A18Rik
		10349.4	0.492474	0.121319	4.05933	4.92143e-05	0.000415232	Nudcd3				7422.67	1.43227	0.0553829	25.8612	1.81851e-147	8.32455e-146	Cycs
		935.501	0.491934	0.111668	4.40531	1.05635e-05	0.000104794	9130023H24Rik				79.774	1.43185	0.273268	5.23973	1.60815e-07	4.1203e-07	Amigo3
		545.075	0.491499	0.124324	3.95336	7.70609e-05	0.000619762	Arsg				33005.7	1.42914	0.0977626	14.6185	2.14059e-48	2.57279e-47	Wfdc2
		11031.8	0.486363	0.107474	4.52539	6.02829e-06	6.31828e-05	Ubtf				216.162	1.42821	0.167634	8.51984	1.59772e-17	7.02863e-17	Dusp5
		5017.5	0.483063	0.108932	4.43454	9.22694e-06	9.27208e-05	Ctdspl				637.611	1.42547	0.112817	12.6353	1.34942e-36	1.21225e-35	F2rl1
		13756.9	0.482161	0.102333	4.71167	2.45693e-06	2.83553e-05	Endod1				35419.8	1.42357	0.043363	32.8292	2.25593e-236	2.13341e-234	Hspa5
		9873.46	0.481507	0.0976457	4.93117	8.17405e-07	1.02927e-05	Ap3s1				34320.6	1.42286	0.0470317	30.2531	4.74587e-201	3.78543e-199	Slc3a2
		1033.27	0.480195	0.120385	3.98883	6.63995e-05	0.000541898	Prmt6				455.823	1.42137	0.118835	11.9609	5.69153e-33	4.57204e-32	Mettl25
		2888.21	0.474986	0.101832	4.66439	3.09531e-06	3.46925e-05	Acp2				3531.24	1.41757	0.0650442	21.7939	2.65128e-105	7.88544e-104	Hes1
		2127.82	0.474739	0.112071	4.23604	2.27498e-05	0.000210239	Kdelc1				9651.88	1.41546	0.0477198	29.662	2.37738e-193	1.77103e-191	Ephx1
		2776.48	0.471922	0.110327	4.27748	1.89018e-05	0.00017874	Ampd2				2228.17	1.41442	0.0716944	19.7285	1.2273e-86	2.88864e-85	Slc35b1
		2831.4	0.470505	0.0993467	4.73599	2.17989e-06	2.53615e-05	Cisd2				152.913	1.41271	0.197257	7.16178	7.96386e-13	2.83401e-12	Hdac9
		3421.83	0.470491	0.115893	4.05971	4.91347e-05	0.00041489	Unc45a				7270.37	1.41242	0.0599003	23.5794	6.26564e-123	2.31741e-121	Rheb
		3079.81	0.469227	0.114359	4.10309	4.07666e-05	0.000355719	Actl6a				1796.6	1.4103	0.0659844	21.3733	2.36974e-101	6.70704e-100	Selo
		2460.64	0.467636	0.102751	4.55114	5.33565e-06	5.66666e-05	Arvcf				3374.82	1.40609	0.080506	17.4657	2.61577e-68	4.62607e-67	Rnase4
		598.71	0.465317	0.116601	3.99068	6.58853e-05	0.000538619	Adamts10				1597.52	1.40432	0.0745607	18.8346	3.93013e-79	8.36504e-78	Crybg3
		1932.13	0.464059	0.0997069	4.65423	3.25197e-06	3.62788e-05	Uxs1				24470.4	1.40365	0.053585	26.1948	3.04605e-151	1.44031e-149	Sft2d2
		1419.27	0.463522	0.104873	4.41985	9.87679e-06	9.85622e-05	Fam73b				1381.8	1.40298	0.0835688	16.7883	2.97218e-63	4.76061e-62	Dennd2d
		568.31	0.459784	0.118522	3.87932	0.000104747	0.000812441	Dimt1				196.04	1.40248	0.196246	7.14655	8.89877e-13	3.15816e-12	Armc2
		9313.1	0.458483	0.104347	4.39383	1.11371e-05	0.000109919	Ncstn				2872.97	1.39994	0.0806377	17.3609	1.63213e-67	2.82944e-66	Ctsc
		4694.68	0.457047	0.103639	4.41	1.03372e-05	0.0001028	Bcas3				24577.6	1.39953	0.0561551	24.9226	4.23709e-137	1.77497e-135	Susd6
		1604.04	0.456634	0.106442	4.28999	1.78678e-05	0.000170084	Coq10b				45.1774	1.39906	0.387062	3.61456	0.000300857	0.000595865	Slc36a1os
		11548.8	0.455319	0.0972794	4.68053	2.86134e-06	3.24496e-05	Epha1				225.77	1.39839	0.265035	5.27625	1.31855e-07	3.40482e-07	Cdsn
		2162.32	0.451364	0.107728	4.18986	2.79123e-05	0.000253716	Ppp1r13b				8196.52	1.39446	0.0836917	16.6619	2.47963e-62	3.8966e-61	Znfx1
		13554.7	0.4461	0.0951795	4.68693	2.77329e-06	3.15755e-05	Mpzl1				12159.2	1.38969	0.0450376	30.8563	4.6164e-209	3.8372e-207	Degs1
		3102.44	0.445986	0.116517	3.82765	0.000129375	0.000978648	Derl2				1326.02	1.38753	0.0857302	16.1849	6.44639e-59	9.58643e-58	Crebl2
		4183.09	0.443566	0.0942749	4.70503	2.53831e-06	2.92241e-05	Adam8				112740	1.38722	0.0890231	15.5827	9.54449e-55	1.31418e-53	C3
		3007.02	0.443062	0.110915	3.99462	6.47982e-05	0.000530033	Pias3				670.701	1.38204	0.102551	13.4766	2.14888e-41	2.19801e-40	C030006K11Rik
		2458.68	0.441052	0.103426	4.26442	2.00418e-05	0.000187631	Gemin4				5460.09	1.38181	0.179185	7.71165	1.242e-14	4.82888e-14	Pi15
		2270.2	0.439486	0.0965643	4.55122	5.33355e-06	5.66666e-05	Nmd3				39.9492	1.37884	0.366611	3.76103	0.000169212	0.000343935	Trpm3
		1413.96	0.439016	0.0966329	4.54313	5.54243e-06	5.84741e-05	Rrp8				8919.22	1.37635	0.050217	27.408	2.19989e-165	1.25425e-163	1700017B05Rik
		1660.59	0.437428	0.107363	4.0743	4.61526e-05	0.000393753	Trmt6				422.203	1.37528	0.144849	9.4946	2.21066e-21	1.16144e-20	Tyw3
		40603.3	0.436834	0.103606	4.21628	2.48361e-05	0.000227479	Kif1c				3507.94	1.37347	0.0618427	22.2091	2.80361e-109	8.85549e-108	Slc22a23
		4262.54	0.435337	0.0920971	4.72693	2.27935e-06	2.64331e-05	Erlec1				13399.6	1.37075	0.0599838	22.8521	1.39409e-115	4.79671e-114	Pip4k2c
		3772.92	0.43473	0.105633	4.11548	3.86376e-05	0.00034003	Aagab				1141.19	1.36939	0.102644	13.3412	1.33372e-40	1.32558e-39	Spata13
		5441.34	0.429616	0.109042	3.93991	8.1512e-05	0.000650468	Clcn4-2				585.706	1.36922	0.107629	12.7217	4.48106e-37	4.06721e-36	Ears2
		7768.87	0.426948	0.101566	4.20365	2.62641e-05	0.00023934	Acadm				1192.89	1.3677	0.108315	12.627	1.49798e-36	1.34342e-35	Hist1h2bc
		18042.5	0.425688	0.0826502	5.15048	2.59823e-07	3.64869e-06	Amfr				4871.2	1.36525	0.0655186	20.8376	1.97698e-96	5.21244e-95	Lmo4
		1356.3	0.42438	0.106865	3.97118	7.15161e-05	0.000579416	Prps1				9157.59	1.36478	0.0577794	23.6206	2.36754e-123	8.81854e-122	Lmtk2
		2886.34	0.423689	0.109262	3.87774	0.000105431	0.000817032	2700081O15Rik				3387.82	1.36317	0.0583183	23.3746	7.7494e-121	2.8006e-119	Tprn
		3943.88	0.415069	0.102044	4.06755	4.7509e-05	0.000403266	Atg13				39.9546	1.35669	0.365627	3.71059	0.000206777	0.000416748	Prkar1b
		3012.67	0.413028	0.10317	4.00337	6.24455e-05	0.000512649	Scfd1				801.229	1.35644	0.101247	13.3974	6.26427e-41	6.31747e-40	Ficd
		11006.4	0.41086	0.0998868	4.11326	3.90113e-05	0.00034248	Lrrc59				19089.8	1.35625	0.0529958	25.5916	1.89227e-144	8.37106e-143	Pigt
		6966.58	0.410532	0.087409	4.69668	2.64431e-06	3.02748e-05	Axin1				819.154	1.35093	0.0899428	15.0199	5.44029e-51	6.89554e-50	Psen2
		9259.39	0.40753	0.0892492	4.5662	4.96639e-06	5.30191e-05	Gosr2				908.227	1.35084	0.289035	4.67363	2.95919e-06	6.96171e-06	Ddx60
		1974.98	0.407316	0.0973753	4.18295	2.87748e-05	0.000260404	Fkrp				162.269	1.34922	0.179832	7.50264	6.25432e-14	2.35401e-13	Homer2
		7241.75	0.400286	0.0979912	4.08492	4.40926e-05	0.000379707	Chtop				62.4709	1.34812	0.283449	4.75613	1.97336e-06	4.70207e-06	Gnmt
		13929.3	0.398657	0.0875058	4.55578	5.21919e-06	5.55118e-05	Dgcr2				113.684	1.34455	0.204992	6.55907	5.41446e-11	1.74298e-10	Ttc39aos1
		12377.3	0.395302	0.100593	3.92972	8.50448e-05	0.00067417	Lman2				2167.24	1.34184	0.0692476	19.3775	1.19534e-83	2.69687e-82	Ypel2
		5352.41	0.392473	0.0991378	3.95886	7.53079e-05	0.000607022	Clcn7				152.617	1.34127	0.182873	7.33443	2.22662e-13	8.13441e-13	Cth
		2661.39	0.391824	0.0891054	4.39731	1.09603e-05	0.000108396	Mafk				19367.8	1.33803	0.0578532	23.128	2.42187e-118	8.59518e-117	Hexa
		3116.31	0.391691	0.0980048	3.99665	6.42459e-05	0.000526413	Phka2				4230.98	1.33756	0.063003	21.2301	5.03322e-100	1.40441e-98	Snx8
		3907.97	0.390811	0.0983494	3.9737	7.0765e-05	0.000573943	Ube2v2				1951.55	1.33184	0.0987388	13.4885	1.82661e-41	1.87157e-40	Lyn
		98128.2	0.390208	0.100286	3.89095	9.98541e-05	0.000777424	Aplp2				1259.09	1.33153	0.0792401	16.8038	2.28864e-63	3.68069e-62	Ttc22
		2931.08	0.388458	0.0881809	4.40524	1.05668e-05	0.000104794	Elmo2				173.179	1.33153	0.189252	7.03577	1.98167e-12	6.92096e-12	Itga8
		4765.56	0.383136	0.095375	4.01715	5.89066e-05	0.000486546	Dhx30				3267.47	1.32876	0.106182	12.5141	6.25513e-36	5.50041e-35	Cgnl1
		5847.63	0.372238	0.0856752	4.34476	1.39427e-05	0.000135288	Tmem165				7884.17	1.3264	0.0583098	22.7474	1.52158e-114	5.16782e-113	Atp6v1h
		26326.2	0.36761	0.0900188	4.08371	4.43224e-05	0.000380966	Nptn				7118.43	1.325	0.0806775	16.4234	1.29985e-60	1.97961e-59	Phlda1
		5876.87	0.362695	0.0878299	4.12952	3.63527e-05	0.00032209	Taf5l				1639.45	1.32302	0.0680747	19.4348	3.92216e-84	8.93834e-83	Cds1
		4918.26	0.349887	0.0891571	3.92439	8.69492e-05	0.000688129	Dhcr7				39.8233	1.32285	0.356289	3.71286	0.000204931	0.00041329	Kcnrg
		4278.67	0.343729	0.0826671	4.15799	3.21058e-05	0.000287116	Ankrd46				20631.1	1.3225	0.0484998	27.2681	1.01397e-163	5.63858e-162	Ltbp3
		4151.85	0.337804	0.0870278	3.88156	0.000103787	0.000806299	Sema4a				1132.12	1.32171	0.0870313	15.1866	4.33812e-52	5.62495e-51	Ttc39a
		8786.88	-0.334568	0.0842594	-3.97069	7.1665e-05	0.00058026	Grsf1				427.172	1.32058	0.115562	11.4274	3.04983e-30	2.23094e-29	B3galt6
		2428.43	-0.364935	0.0947759	-3.8505	0.000117876	0.00090307	Agtrap				64.4712	1.31983	0.287498	4.59075	4.41651e-06	1.02378e-05	Gnal
		9380.45	-0.366959	0.082043	-4.47276	7.72156e-06	7.89169e-05	Cdc5l				286.31	1.31615	0.150127	8.76695	1.83568e-18	8.46204e-18	Cdr2
		6442.54	-0.382506	0.0920335	-4.15616	3.2364e-05	0.000289064	Mta1				2322.55	1.31588	0.071354	18.4415	6.09704e-76	1.2282e-74	Coq10b
		10618.7	-0.395091	0.0992147	-3.98218	6.82872e-05	0.000556357	Sympk				538.568	1.31581	0.108436	12.1344	6.94083e-34	5.76929e-33	Mpv17l
		17072.2	-0.405717	0.0957422	-4.2376	2.25921e-05	0.000209057	Arf6				1843.02	1.31573	0.0922409	14.2641	3.66481e-46	4.20322e-45	Dnajb9
		3997.72	-0.405879	0.0901785	-4.50084	6.76856e-06	7.01238e-05	Fam76a				2078.33	1.311	0.105292	12.4511	1.37986e-35	1.20067e-34	Slc5a3
		9565.42	-0.41327	0.0842805	-4.9035	9.41424e-07	1.17108e-05	Cd99l2				241.696	1.30913	0.14488	9.03597	1.62549e-19	7.86741e-19	Lincppara
		5589.25	-0.416549	0.0904877	-4.60338	4.15689e-06	4.508e-05	Usp3				830.852	1.30838	0.0912259	14.3422	1.19245e-46	1.37865e-45	Mir22hg
		808.581	-0.423359	0.106357	-3.98055	6.8756e-05	0.00055986	Fam175a				152.708	1.30598	0.200107	6.52642	6.73584e-11	2.15779e-10	Gdpd2
		4388.02	-0.423802	0.105779	-4.00648	6.16316e-05	0.000506725	Abca7				3684.47	1.30596	0.073128	17.8586	2.47755e-71	4.6692e-70	Mgat5
		4889.35	-0.425656	0.110717	-3.84455	0.000120773	0.00092036	Ctc1				28672.4	1.30462	0.0564913	23.0942	5.29758e-118	1.87589e-116	Csrp1
		2723.46	-0.427113	0.102094	-4.18353	2.87019e-05	0.000260071	Wdr91				274.298	1.30276	0.138108	9.43294	3.98752e-21	2.06679e-20	Cdhr1
		30233.7	-0.435253	0.0899215	-4.84037	1.296e-06	1.56346e-05	Tpm4				16454.5	1.30204	0.0487014	26.7352	1.8352e-157	9.37969e-156	Pdia6
		3861.8	-0.43654	0.111577	-3.91246	9.13618e-05	0.000717522	Hsd17b12				557.294	1.29772	0.106862	12.1439	6.18088e-34	5.14845e-33	Slc25a38
		20058.5	-0.440503	0.0962373	-4.57725	4.71124e-06	5.05957e-05	Serpinb5				33374.6	1.29763	0.0632884	20.5034	2.00837e-93	5.09121e-92	St14
		1281.04	-0.445168	0.108669	-4.09655	4.19352e-05	0.000365066	Sdccag8				12318.8	1.29697	0.073776	17.5799	3.51287e-69	6.29011e-68	Klf6
		1869.69	-0.450976	0.099865	-4.51586	6.30614e-06	6.5855e-05	Mettl7a1				51531.7	1.29566	0.0486079	26.6555	1.54674e-156	7.85457e-155	Cd200
		1184.33	-0.453771	0.110281	-4.11468	3.87709e-05	0.000340994	Taf1b				1528.66	1.29375	0.0700169	18.4777	3.12232e-76	6.33002e-75	Ubxn8
		795.987	-0.456117	0.118292	-3.85587	0.000115318	0.000885833	Zbtb25				2748.7	1.29254	0.103339	12.5078	6.76818e-36	5.93832e-35	Mtss1l
		13346	-0.459255	0.120102	-3.82388	0.000131366	0.000991869	Cdc25b				35977.1	1.29027	0.0434779	29.6764	1.5469e-193	1.15783e-191	Gm2a
		4549.29	-0.461506	0.117987	-3.91149	9.17284e-05	0.000720008	Snx6				10198	1.28985	0.0638552	20.1997	9.85541e-91	2.43578e-89	Ier2
		1924.7	-0.4628	0.0936534	-4.94163	7.74733e-07	9.83288e-06	Map2k6				543.855	1.28946	0.105577	12.2135	2.63331e-34	2.21448e-33	Scnn1a
		1062.12	-0.46298	0.109827	-4.21555	2.49175e-05	0.00022808	Ccdc57				2134.78	1.28862	0.0749712	17.1883	3.25173e-66	5.51606e-65	Myc
		2417.36	-0.481712	0.104777	-4.5975	4.27589e-06	4.62658e-05	Gm14325				5724.03	1.28859	0.0683337	18.8573	2.56121e-79	5.46611e-78	Letm1
		2773.08	-0.483428	0.116838	-4.13759	3.50966e-05	0.000311537	Baiap2l1				3022.49	1.28851	0.059569	21.6306	9.25554e-104	2.71193e-102	Adpgk
		697.291	-0.484187	0.115701	-4.1848	2.85412e-05	0.000259105	Foxf2				6524.9	1.28846	0.0574676	22.4205	2.48156e-111	8.01458e-110	Nt5c2
		712.511	-0.484394	0.121208	-3.9964	6.43127e-05	0.000526661	Stambpl1				12703.3	1.28549	0.0633547	20.2904	1.56321e-91	3.89397e-90	Shroom3
		10351.9	-0.485768	0.125651	-3.866	0.000110633	0.000853489	P4ha1				6016	1.2817	0.05131	24.9796	1.01966e-137	4.32888e-136	Dnajb11
		5707.15	-0.485948	0.114782	-4.23365	2.2993e-05	0.000212084	Mast3				4866.39	1.27915	0.0675949	18.9237	7.26937e-80	1.57699e-78	Casz1
		3246.13	-0.486182	0.120409	-4.03775	5.39654e-05	0.00045061	Scarb1				464.473	1.27908	0.116212	11.0064	3.55862e-28	2.43929e-27	Pcdhb5
		10294.8	-0.492781	0.099002	-4.97748	6.4416e-07	8.29276e-06	Sqle				3203.49	1.27554	0.0637232	20.0169	3.92571e-89	9.53826e-88	Slc9a8
		7961.44	-0.49678	0.101651	-4.8871	1.0233e-06	1.25878e-05	Stk38				5627.8	1.27297	0.0560392	22.7157	3.13563e-114	1.06041e-112	Spg20
		1009.65	-0.497088	0.117351	-4.2359	2.27637e-05	0.000210239	Haus3				33647.2	1.27265	0.0979209	12.9967	1.27769e-38	1.20253e-37	Mt1
		769.075	-0.49714	0.121403	-4.09496	4.2225e-05	0.000367107	Trim62				1271.06	1.2723	0.084142	15.1208	1.18097e-51	1.51882e-50	2410002F23Rik
		2728.75	-0.498857	0.12155	-4.10411	4.05872e-05	0.000354368	Srbd1				3822.25	1.27008	0.0672593	18.8833	1.56484e-79	3.36697e-78	Zcchc24
		692.858	-0.500757	0.121519	-4.12081	3.77535e-05	0.000333269	Fut10				150.943	1.26837	0.196095	6.46818	9.91933e-11	3.14003e-10	Gpa33
		5170.66	-0.512271	0.117851	-4.34678	1.38151e-05	0.00013414	Ppard				46.9924	1.26805	0.321361	3.94587	7.95091e-05	0.00016678	Tmem198
		930.086	-0.512455	0.120356	-4.25784	2.06416e-05	0.000192328	Speg				82634.1	1.26773	0.0500781	25.315	2.18436e-141	9.37433e-140	Perp
		3715.73	-0.518152	0.0865517	-5.98661	2.14255e-09	4.16349e-08	Gnpda1				3014.96	1.26672	0.0679907	18.6307	1.81016e-77	3.76651e-76	Ube2f
		1527.37	-0.518213	0.131183	-3.95029	7.80573e-05	0.000626725	Gpt2				3441.92	1.26587	0.0666747	18.9857	2.23884e-80	4.87025e-79	Gpcpd1
		2612.3	-0.51919	0.0937411	-5.53856	3.04975e-08	5.00061e-07	Mb21d2				6376.83	1.26579	0.0479433	26.4018	1.30767e-153	6.43363e-152	Rnf149
		3338.03	-0.520168	0.127222	-4.08866	4.33873e-05	0.000375858	Slc12a7				12311.6	1.265	0.057434	22.0252	1.65184e-107	5.08528e-106	Slc9a1
		682.141	-0.521256	0.116491	-4.47466	7.65335e-06	7.83682e-05	Fam118a				1454.36	1.26487	0.0807941	15.6554	3.05011e-55	4.25157e-54	Tspan17
		1481.06	-0.528874	0.134381	-3.93562	8.2981e-05	0.000659264	Sirpa				735.05	1.26481	0.097921	12.9167	3.62391e-38	3.38253e-37	Lox
		7676.01	-0.530756	0.103725	-5.11696	3.10495e-07	4.28495e-06	Pacs1				97.3586	1.26228	0.23819	5.29945	1.16151e-07	3.01161e-07	Pcdhb10
		4250.07	-0.530953	0.114415	-4.64058	3.47437e-06	3.85608e-05	Sfxn1				4045.19	1.26139	0.0642947	19.6189	1.06623e-85	2.47998e-84	Ostm1
		3161.15	-0.535656	0.130029	-4.1195	3.79698e-05	0.000334973	Jak3				2903.15	1.26047	0.0724744	17.3919	9.50878e-68	1.65388e-66	Arf2
		14941	-0.535686	0.100601	-5.32484	1.01043e-07	1.52146e-06	Slc20a1				178.981	1.25794	0.188824	6.662	2.70131e-11	8.86388e-11	Btc
		13343.2	-0.536591	0.136648	-3.92681	8.60794e-05	0.000681996	Sfpq				14563.1	1.25577	0.05053	24.852	2.46176e-136	1.01776e-134	Atf4
		17805.9	-0.53956	0.120338	-4.4837	7.33612e-06	7.54602e-05	Klf13				7068.88	1.25473	0.0527878	23.7693	6.94621e-125	2.63073e-123	Kcnk1
		2504.9	-0.541313	0.114118	-4.74344	2.1012e-06	2.44658e-05	Zswim4				28796.8	1.25353	0.058511	21.4238	8.02315e-102	2.30801e-100	Sorbs2
		23650.5	-0.541612	0.101311	-5.34603	8.99025e-08	1.36371e-06	B4galt1				1342.99	1.25306	0.0794807	15.7656	5.36897e-56	7.61151e-55	Tsr2
		4219.5	-0.543452	0.137944	-3.93965	8.16021e-05	0.000650779	B3gnt3				1801.69	1.25232	0.0742609	16.8638	8.30517e-64	1.34665e-62	Sec11c
		12881.2	-0.543799	0.136761	-3.97626	7.00065e-05	0.000569074	Pde7a				1376.28	1.25216	0.0839119	14.9224	2.35798e-50	2.94384e-49	Ogfod3
		849.468	-0.545045	0.135774	-4.01436	5.96064e-05	0.000491198	Acss2				19097.6	1.25166	0.0526111	23.7908	4.15992e-125	1.59074e-123	Mpzl1
		523.241	-0.545214	0.115407	-4.72426	2.30955e-06	2.67187e-05	Btbd19				36.7914	1.24722	0.352425	3.53898	0.000401683	0.000785025	Pcdhb3
		1140.74	-0.545654	0.123439	-4.42044	9.84994e-06	9.83626e-05	Plcd3				4418.19	1.2454	0.074216	16.7808	3.37233e-63	5.39607e-62	Errfi1
		7657.24	-0.54912	0.0935152	-5.87198	4.30614e-09	8.13697e-08	Eif2a				758.886	1.24518	0.130986	9.50622	1.97721e-21	1.04087e-20	Arc
		1379.05	-0.54914	0.12874	-4.2655	1.99451e-05	0.000186992	Pola2				100.834	1.2423	0.247341	5.02263	5.09674e-07	1.26601e-06	Gm20324
		2430.93	-0.555002	0.136882	-4.05461	5.02177e-05	0.000422545	Ccnk				712.043	1.24176	0.0954417	13.0107	1.06403e-38	1.00444e-37	Comtd1
		12176	-0.55638	0.108079	-5.1479	2.63415e-07	3.68473e-06	Tes				14046.3	1.24174	0.0632156	19.6429	6.64677e-86	1.54827e-84	Cited2
		2232.31	-0.557355	0.114144	-4.88293	1.0452e-06	1.28242e-05	Agbl5				13367.2	1.2409	0.208682	5.94637	2.74147e-09	7.92386e-09	Malat1
		11258.5	-0.558991	0.125789	-4.44387	8.83541e-06	8.92805e-05	Marcks				84.5767	1.24034	0.259794	4.7743	1.80329e-06	4.30854e-06	Fam65b
		1034.69	-0.559999	0.120639	-4.64193	3.45174e-06	3.83883e-05	Tmem194b				6901.08	1.24007	0.0656918	18.877	1.7624e-79	3.77149e-78	Tor1aip1
		1601.77	-0.563504	0.122772	-4.58985	4.43574e-06	4.78514e-05	Tuft1				16578	1.23935	0.0576394	21.5018	1.49684e-102	4.34552e-101	Enah
		6371.98	-0.564861	0.129389	-4.3656	1.26775e-05	0.000123931	Sh3kbp1				3082.93	1.23868	0.083371	14.8575	6.22419e-50	7.71574e-49	Rexo2
		3065.77	-0.566603	0.122554	-4.6233	3.77681e-06	4.13953e-05	Orc3				5612.5	1.23846	0.058144	21.2999	1.13806e-100	3.19812e-99	Lpin1
		4128.25	-0.568425	0.121761	-4.66836	3.0361e-06	3.41087e-05	Id4				1886.2	1.23677	0.0715343	17.2891	5.67875e-67	9.79088e-66	Tmco4
		838.319	-0.569096	0.132026	-4.31047	1.62909e-05	0.000155864	Slc38a9				290.552	1.23672	0.205748	6.01085	1.84554e-09	5.39852e-09	Megf6
		1824.68	-0.569121	0.108433	-5.24858	1.53278e-07	2.23091e-06	Stard5				16495.6	1.236	0.076053	16.2518	2.16864e-59	3.25255e-58	Pam
		2244.05	-0.570678	0.103572	-5.50998	3.58865e-08	5.8179e-07	Mpp6				4932.08	1.23533	0.0730906	16.9013	4.40174e-64	7.19634e-63	Ptprj
		12946	-0.574286	0.118555	-4.84403	1.27232e-06	1.53876e-05	Plekha2				7395.63	1.23503	0.0595271	20.7473	1.29708e-95	3.39151e-94	Wwc1
		3414.53	-0.575455	0.145626	-3.95159	7.76327e-05	0.000624013	Cdca7l				1090.25	1.23403	0.0816101	15.121	1.17656e-51	1.51438e-50	Ppa1
		561.241	-0.576014	0.149177	-3.86129	0.000112792	0.000867352	Msx2				4939.86	1.23401	0.0655398	18.8283	4.4248e-79	9.40523e-78	Tcf7l2
		3464.2	-0.576954	0.110922	-5.20143	1.9776e-07	2.81563e-06	Stk38l				9474.49	1.23147	0.0560012	21.9901	3.58237e-107	1.09857e-105	Trim8
		10768.2	-0.578106	0.0894192	-6.46513	1.01215e-10	2.38602e-09	Coro1c				3224.68	1.23029	0.0689925	17.8322	3.97687e-71	7.45038e-70	Arhgap44
		5143.27	-0.578393	0.141541	-4.08639	4.38137e-05	0.000378176	Mast2				2599.44	1.23012	0.0662814	18.559	6.89245e-77	1.41184e-75	Aldh6a1
		619.72	-0.583952	0.122916	-4.7508	2.02612e-06	2.36491e-05	Rad51c				1405.8	1.22984	0.0742796	16.5569	1.4272e-61	2.199e-60	Slc43a2
		2130.43	-0.584443	0.0953805	-6.12749	8.92767e-10	1.82617e-08	Eif4e3				2560.56	1.22953	0.0620822	19.8049	2.70001e-87	6.43157e-86	Bpnt1
		19078.8	-0.584597	0.151105	-3.86881	0.000109367	0.000845236	Srp72				48.1377	1.22772	0.33151	3.70341	0.000212722	0.000428401	Myo5c
		12248.5	-0.587604	0.116997	-5.0224	5.10296e-07	6.71369e-06	Ugp2				4273.72	1.22535	0.0541667	22.6218	2.64469e-113	8.88672e-112	Ltbp1
		1600.46	-0.588046	0.0944495	-6.22603	4.7839e-10	1.02675e-08	9230110C19Rik				483.097	1.22455	0.115049	10.6437	1.86625e-26	1.20547e-25	Nr1h3
		10088.7	-0.589294	0.0896761	-6.57137	4.98557e-11	1.24683e-09	Tpd52				41.2815	1.22364	0.332006	3.68559	0.000228169	0.000458166	1110020A21Rik
		3555.47	-0.590112	0.149884	-3.93712	8.2465e-05	0.000655724	Msmo1				2116.61	1.22324	0.0811624	15.0716	2.49175e-51	3.17869e-50	Hsf2
		3249.52	-0.590545	0.109393	-5.39838	6.72472e-08	1.04204e-06	Anp32e				247.318	1.22211	0.156885	7.78985	6.70883e-15	2.63367e-14	Itga1
		1404.68	-0.591061	0.153494	-3.85072	0.000117771	0.000902741	Map3k9				205.961	1.22207	0.170821	7.15409	8.42274e-13	2.99191e-12	F2r
		13249	-0.592521	0.105644	-5.60867	2.03887e-08	3.44929e-07	Fads1				9251.14	1.22024	0.067599	18.0511	7.73511e-73	1.48614e-71	Mat2a
		11047.7	-0.593302	0.112725	-5.26329	1.41501e-07	2.08322e-06	Fus				1281.89	1.2196	0.26465	4.60834	4.05898e-06	9.44225e-06	Irf7
		883.873	-0.596948	0.10886	-5.48361	4.16739e-08	6.65117e-07	Spry2				135.806	1.21919	0.217433	5.60719	2.05633e-08	5.62738e-08	Cidea
		2394.75	-0.597663	0.106463	-5.61383	1.979e-08	3.35985e-07	Il4ra				21361.1	1.21904	0.0589307	20.686	4.63266e-95	1.1994e-93	Aars
		2633.91	-0.599301	0.146791	-4.08267	4.45215e-05	0.000382449	Ulk3				1393.62	1.2178	0.0859867	14.1627	1.55936e-45	1.76285e-44	Jdp2
		4363.91	-0.599503	0.0963019	-6.22524	4.80807e-10	1.0304e-08	Esyt1				366.761	1.21698	0.12055	10.0952	5.8012e-24	3.3845e-23	Pomgnt2
		2177.77	-0.600177	0.130573	-4.59648	4.29698e-06	4.64583e-05	Ticam1				2124.23	1.2159	0.0727263	16.7188	9.55457e-63	1.51654e-61	Csad
		1081.4	-0.607501	0.124071	-4.89641	9.76013e-07	1.20992e-05	Dusp8				2538.86	1.21553	0.102491	11.8599	1.91117e-32	1.51218e-31	Tex15
		1648.88	-0.608655	0.158182	-3.84782	0.000119173	0.000910075	Chaf1a				5412.75	1.21447	0.072162	16.8298	1.47567e-63	2.38295e-62	Crim1
		243.657	-0.609141	0.148415	-4.10431	4.05529e-05	0.000354284	Zfpm1				8888.68	1.21285	0.0684714	17.7133	3.31187e-70	6.07483e-69	Add3
		2783.22	-0.610749	0.159375	-3.83216	0.000127025	0.000964423	Mre11a				8639.57	1.20894	0.0708367	17.0665	2.63324e-65	4.39607e-64	Barx2
		13903.5	-0.611276	0.142842	-4.27938	1.87416e-05	0.000177539	Pfkp				212.659	1.20749	0.194682	6.20233	5.56326e-10	1.68606e-09	Fgfr3
		314.588	-0.611312	0.139721	-4.37524	1.21297e-05	0.00011898	Arhgap8				207.506	1.20524	0.174817	6.89426	5.41476e-12	1.84658e-11	F5
		2672.64	-0.613388	0.120366	-5.09601	3.4688e-07	4.7506e-06	Fam83g				24613.3	1.20021	0.0446073	26.906	1.86603e-159	9.72613e-158	Atp6ap1
		5146.72	-0.61359	0.124062	-4.94584	7.58167e-07	9.63964e-06	Micall2				16679	1.20001	0.0455942	26.3193	1.15298e-152	5.55151e-151	Naa50
		2022.01	-0.614351	0.112337	-5.4688	4.53093e-08	7.21537e-07	Slc25a42				4018.17	1.19653	0.0718694	16.6487	3.094e-62	4.82841e-61	Evi5
		2997.95	-0.614727	0.122095	-5.03482	4.78287e-07	6.35653e-06	Itprip				1956.6	1.1946	0.0720981	16.5691	1.16479e-61	1.80171e-60	Arhgef26
		2050.48	-0.615321	0.143829	-4.27813	1.88467e-05	0.000178417	Pkp2				165.507	1.19221	0.189688	6.28513	3.27582e-10	1.00691e-09	Rnf43
		13794.1	-0.625649	0.124038	-5.04401	4.55869e-07	6.08107e-06	Tef				721.561	1.19052	0.0886796	13.4249	4.31917e-41	4.39231e-40	Ppif
		1178.62	-0.62774	0.112975	-5.55645	2.75309e-08	4.54008e-07	Whrn				1374.87	1.19042	0.070489	16.888	5.51501e-64	8.9885e-63	Rmdn3
		3758.7	-0.628272	0.0898392	-6.99329	2.68519e-12	8.07804e-11	Abhd5				1164.23	1.1898	0.109601	10.8558	1.87251e-27	1.25573e-26	Taf4b
		12379.7	-0.638222	0.165104	-3.86557	0.000110831	0.00085456	Bzw2				103.439	1.18942	0.22834	5.20898	1.89878e-07	4.84058e-07	Car15
		5616.94	-0.638389	0.104152	-6.12939	8.82153e-10	1.80703e-08	Runx3				49.7601	1.18891	0.330303	3.59946	0.00031888	0.000629746	4833423E24Rik
		209.535	-0.638782	0.16595	-3.84924	0.000118484	0.000906277	Ccdc173				8592.74	1.18769	0.0628033	18.9112	9.21721e-80	1.99681e-78	Bbox1
		1182.4	-0.639725	0.164079	-3.89889	9.66334e-05	0.000755211	Pvr				366.144	1.18547	0.136469	8.68674	3.72978e-18	1.69655e-17	Nkiras1
		11832.9	-0.643164	0.141819	-4.53509	5.75783e-06	6.05688e-05	Cops2				30977.6	1.18135	0.0513828	22.9912	5.71151e-117	1.99121e-115	Atp13a3
		498.312	-0.647369	0.162043	-3.99504	6.46839e-05	0.000529399	Tmem173				6597.6	1.18056	0.0638126	18.5004	2.04963e-76	4.17137e-75	Fam129a
		6798.8	-0.648856	0.100834	-6.43492	1.23535e-10	2.85599e-09	Tmem57				16392.6	1.18036	0.0685939	17.208	2.31397e-66	3.94223e-65	Ifi30
		4540.37	-0.65015	0.137849	-4.71639	2.40068e-06	2.77284e-05	Dhx32				273.101	1.17836	0.159502	7.38776	1.49326e-13	5.4972e-13	Alg3
		248.257	-0.654546	0.157127	-4.16571	3.1038e-05	0.00027878	Dnm3				1803.71	1.17728	0.100807	11.6785	1.6409e-31	1.25861e-30	Ppap2b
		5341.51	-0.655053	0.144033	-4.54793	5.41749e-06	5.73241e-05	Mxi1				648.073	1.17718	0.095361	12.3444	5.22018e-35	4.46599e-34	Veph1
		4615.85	-0.655586	0.115259	-5.68796	1.28563e-08	2.26006e-07	Irf1				2859.52	1.17707	0.0825868	14.2525	4.32562e-46	4.95392e-45	Fam53b
		7226.94	-0.656072	0.122359	-5.36187	8.23662e-08	1.25602e-06	Slc1a4				4939.93	1.17655	0.074278	15.8399	1.65207e-56	2.35693e-55	Zfp36l2
		2249.25	-0.656384	0.133174	-4.92879	8.2742e-07	1.04097e-05	Gm4737				227.786	1.17513	0.15634	7.51649	5.62682e-14	2.12239e-13	Pcdhb18
		1380.22	-0.656655	0.124523	-5.27338	1.33937e-07	1.98149e-06	Cntrob				972.079	1.17465	0.0972328	12.0808	1.33456e-33	1.09946e-32	Tmem117
		6062.06	-0.656947	0.168195	-3.90586	9.38891e-05	0.000735763	Tbl2				269.9	1.17452	0.149104	7.87719	3.34819e-15	1.33261e-14	Tgfbr3
		7109.99	-0.657856	0.158708	-4.14507	3.39708e-05	0.000301916	Car13				1354.86	1.17388	0.12422	9.45003	3.38725e-21	1.75854e-20	Irgm2
		4742.59	-0.660163	0.106461	-6.20098	5.61112e-10	1.18484e-08	Ehbp1l1				13207.7	1.17379	0.0522575	22.4616	9.86448e-112	3.19897e-110	Ssfa2
		588.378	-0.663835	0.148932	-4.45731	8.29963e-06	8.41076e-05	Eml1				6367.93	1.17248	0.066449	17.6448	1.11562e-69	2.01591e-68	Atf6
		260.464	-0.66725	0.147834	-4.5135	6.37664e-06	6.64946e-05	Figf				193.933	1.17055	0.193296	6.05573	1.39784e-09	4.12715e-09	Pcdhb15
		672.962	-0.670098	0.167385	-4.00332	6.24591e-05	0.000512649	Mturn				9124.37	1.16855	0.0552978	21.132	4.04003e-99	1.11157e-97	Msi2
		446.745	-0.673806	0.171069	-3.93881	8.18881e-05	0.000652021	Sh3bp5				55.7703	1.16824	0.295674	3.95109	7.7795e-05	0.000163306	Tas1r3
		704.221	-0.675285	0.176316	-3.82997	0.000128157	0.000971481	Zranb3				2982.89	1.16632	0.0592021	19.7007	2.12717e-86	4.99174e-85	Pccb
		792.525	-0.675764	0.168249	-4.01645	5.90817e-05	0.000487433	Irx3				15207.2	1.16601	0.0635527	18.3471	3.47902e-75	6.93739e-74	Oxr1
		35801.5	-0.675859	0.154929	-4.36239	1.28648e-05	0.000125506	Smtn				4796.5	1.16576	0.0515523	22.613	3.22491e-113	1.08134e-111	Tmx2
		2387.18	-0.676045	0.139449	-4.84797	1.24729e-06	1.51231e-05	Mcph1				59.605	1.16566	0.290208	4.01665	5.90323e-05	0.000125258	Gm16740
		910.038	-0.676886	0.15733	-4.30234	1.69006e-05	0.00016159	Plekho2				46.5519	1.16529	0.332574	3.50385	0.000458576	0.00089114	Abhd11os
		2406.88	-0.680805	0.111317	-6.11591	9.60095e-10	1.94727e-08	Rhobtb2				10749	1.1648	0.0468967	24.8375	3.53215e-136	1.45269e-134	Serp1
		8092.41	-0.682221	0.171286	-3.98293	6.80699e-05	0.000554901	Nampt				6283.28	1.16431	0.229105	5.08199	3.73508e-07	9.35133e-07	Lect1
		415.862	-0.682367	0.160791	-4.24382	2.1975e-05	0.000203609	Prdm9				93.0662	1.16422	0.247577	4.70246	2.57042e-06	6.08342e-06	Rapgef3
		8309.97	-0.682425	0.159847	-4.26923	1.96151e-05	0.000184597	Pcyt1b				12270.1	1.16394	0.059901	19.4311	4.21096e-84	9.58266e-83	Traf4
		1216.13	-0.68391	0.124528	-5.492	3.97414e-08	6.39241e-07	Srd5a1				2157.98	1.1636	0.0964258	12.0673	1.57205e-33	1.29309e-32	Cldn4
		3002	-0.685111	0.13835	-4.95203	7.34439e-07	9.34622e-06	Ahcy				273.856	1.16282	0.137484	8.45787	2.72299e-17	1.1873e-16	Rs1
		1731.84	-0.686136	0.137213	-5.00052	5.71761e-07	7.44065e-06	Mid1ip1				262.103	1.16264	0.152883	7.60478	2.85399e-14	1.09189e-13	Pcdhb20
		1650.91	-0.689103	0.172756	-3.98888	6.63869e-05	0.000541898	Dok4				78.0155	1.16201	0.241142	4.81878	1.44441e-06	3.47368e-06	Gm4013
		628.869	-0.690171	0.151701	-4.54955	5.37614e-06	5.70546e-05	Map3k6				66.9431	1.162	0.309023	3.76024	0.00016975	0.000344983	Gbp4
		2101.46	-0.690365	0.157553	-4.3818	1.17701e-05	0.000115769	Ttll5				33736.9	1.16137	0.0594273	19.5427	4.75739e-85	1.10166e-83	Foxc1
		19178	-0.692218	0.109893	-6.29901	2.99551e-10	6.57641e-09	Ipo5				710.443	1.16078	0.090021	12.8945	4.83327e-38	4.4954e-37	Fam69a
		1202.53	-0.694731	0.155583	-4.46534	7.9942e-06	8.14141e-05	Adamts4				31854.3	1.16047	0.0519896	22.3213	2.29765e-110	7.31589e-109	Cd164
		6333.27	-0.695236	0.119163	-5.83431	5.4015e-09	1.00613e-07	Jun				290.274	1.15921	0.137135	8.45301	2.83888e-17	1.23613e-16	5430403N17Rik
		651.679	-0.695267	0.174867	-3.97599	7.00878e-05	0.000569414	Sox11				44.5957	1.1582	0.324063	3.57399	0.000351585	0.00069148	Gm19510
		857.991	-0.696731	0.140254	-4.96764	6.77735e-07	8.66296e-06	Tmprss13				16128.8	1.15672	0.0514553	22.48	6.51042e-112	2.12436e-110	Myo18a
		1067.92	-0.700931	0.154873	-4.52584	6.01551e-06	6.30949e-05	Prkch				1401.79	1.15574	0.0833654	13.8636	1.05279e-43	1.13571e-42	Gm20300
		1740.95	-0.701707	0.172518	-4.06743	4.75338e-05	0.000403266	Galns				426.442	1.15568	0.142865	8.08931	6.00034e-16	2.47037e-15	Fam13a
		1135.56	-0.703691	0.159257	-4.41859	9.93486e-06	9.9073e-05	Pdgfrl				5721.87	1.15507	0.0620747	18.6078	2.77992e-77	5.76916e-76	Tcf7l1
		9290.61	-0.705068	0.173596	-4.06153	4.87512e-05	0.000411893	Kpna2				7755.15	1.15441	0.0695902	16.5887	8.40695e-62	1.30295e-60	Nedd4l
		3745.62	-0.705875	0.105844	-6.66902	2.57516e-11	6.74513e-10	Odf2				2913.69	1.15412	0.0600425	19.2217	2.43718e-82	5.40594e-81	Slc25a16
		1683.75	-0.707852	0.170211	-4.15868	3.20098e-05	0.000286435	Fam171a2				1276.83	1.15406	0.077834	14.8272	9.76755e-50	1.20421e-48	Spata5
		2643.2	-0.710189	0.146174	-4.85853	1.1826e-06	1.43994e-05	D930015E06Rik				253.456	1.15367	0.164291	7.02213	2.18507e-12	7.60875e-12	1700113A16Rik
		950.74	-0.711078	0.155738	-4.56586	4.9746e-06	5.30674e-05	Prim1				1024.1	1.15366	0.0821887	14.0367	9.29702e-45	1.02893e-43	Ing5
		817.965	-0.711247	0.158932	-4.47516	7.63532e-06	7.83138e-05	Ncam1				583.776	1.15318	0.105424	10.9385	7.54646e-28	5.13491e-27	Scamp5
		1046.11	-0.711431	0.159719	-4.45426	8.41825e-06	8.52496e-05	Aldh5a1				963.413	1.15298	0.115391	9.99189	1.65389e-23	9.50508e-23	Clec12a
		337.797	-0.711798	0.175149	-4.06396	4.82471e-05	0.000407874	Adhfe1				5210.64	1.15271	0.0768688	14.9958	7.82168e-51	9.89014e-50	Odc1
		3313.73	-0.714858	0.174012	-4.10809	3.9895e-05	0.000349385	Ak1				1691.79	1.15251	0.0698346	16.5034	3.46998e-61	5.33087e-60	Gnptg
		1666.79	-0.716314	0.142811	-5.01582	5.28077e-07	6.91717e-06	Ccdc34				2607.31	1.15189	0.0631396	18.2435	2.33099e-74	4.60166e-73	Adi1
		22024.8	-0.716316	0.115755	-6.18822	6.08469e-10	1.27362e-08	Btg1				939.929	1.15158	0.0836339	13.7693	3.90063e-43	4.15953e-42	Tm2d1
		121.309	-0.716599	0.187505	-3.82176	0.000132503	0.000999159	P2ry1				99.2052	1.14937	0.231469	4.96555	6.8505e-07	1.68678e-06	Calr3
		1040.46	-0.720913	0.104279	-6.9133	4.7352e-12	1.38399e-10	Spata6				2409.33	1.14854	0.0730918	15.7137	1.2191e-55	1.71445e-54	Neu1
		6833.5	-0.722968	0.180604	-4.00305	6.253e-05	0.000512938	Vim				591.909	1.14557	0.099828	11.4755	1.75179e-30	1.2922e-29	D3Ertd751e
		11310.4	-0.723327	0.145592	-4.96817	6.7589e-07	8.65243e-06	Lamc2				5943.85	1.14173	0.0516452	22.1072	2.69598e-108	8.43121e-107	Ubl3
		243.19	-0.728443	0.168368	-4.3265	1.51498e-05	0.000145722	Sp9				10373	1.14122	0.0480051	23.7729	6.36852e-125	2.41774e-123	Setd3
		544.308	-0.729423	0.168794	-4.32139	1.55051e-05	0.00014894	Cand2				75.5614	1.14108	0.280458	4.06863	4.72908e-05	0.000101078	Prodh
		23925.4	-0.734243	0.140897	-5.21121	1.87609e-07	2.68707e-06	Bnip3l				3837.96	1.14084	0.0986278	11.5672	6.04396e-31	4.54318e-30	Tiam1
		1185.38	-0.73609	0.107549	-6.84421	7.68984e-12	2.20718e-10	Map3k14				4014.8	1.14079	0.0750817	15.194	3.87439e-52	5.04437e-51	Pigk
		3224.58	-0.736098	0.192628	-3.82134	0.000132728	0.000999806	Trim59				121.571	1.14029	0.258913	4.40415	1.06198e-05	2.3912e-05	Prex1
		4914.95	-0.737425	0.191564	-3.84949	0.000118362	0.000905825	Mtus1				7650.58	1.14019	0.0526931	21.6383	7.83822e-104	2.3052e-102	Rcn2
		598.858	-0.742663	0.158278	-4.69213	2.70377e-06	3.08819e-05	2210404O09Rik				6428.81	1.13339	0.0606619	18.6837	6.71368e-78	1.40809e-76	Cdc42ep4
		909.12	-0.742877	0.146965	-5.05478	4.30895e-07	5.7801e-06	Gpr146				47.0993	1.13306	0.30921	3.66435	0.000247963	0.000496209	Nwd1
		998.603	-0.745044	0.147136	-5.06364	4.11329e-07	5.53312e-06	Reep6				625.194	1.13285	0.0957893	11.8265	2.8468e-32	2.23902e-31	Saysd1
		7794.53	-0.745184	0.174776	-4.26364	2.01124e-05	0.000188169	Cyp51				2410.94	1.13256	0.062948	17.992	2.2502e-72	4.28678e-71	Metrnl
		865.614	-0.746733	0.14497	-5.15096	2.59152e-07	3.64281e-06	Nyap1				2527.58	1.13019	0.0664879	16.9985	8.42627e-65	1.39201e-63	Ggh
		1703.88	-0.747256	0.117314	-6.36969	1.8941e-10	4.26248e-09	Hmgn5				901.326	1.12942	0.113919	9.91427	3.60875e-23	2.04937e-22	Inpp5j
		1117.03	-0.750767	0.139126	-5.39631	6.80262e-08	1.05298e-06	Poc1b				6669.83	1.12926	0.053253	21.2056	8.47254e-100	2.35576e-98	Large
		875.068	-0.754727	0.154332	-4.89029	1.00689e-06	1.24071e-05	Ptn				2714.42	1.12895	0.0705621	15.9994	1.29114e-57	1.87935e-56	Pno1
		3860.41	-0.76359	0.184335	-4.14239	3.437e-05	0.000305275	Sc5d				2869.64	1.12869	0.0597262	18.8977	1.19135e-79	2.57387e-78	Orc2
		12672.5	-0.764355	0.145583	-5.25032	1.51833e-07	2.21886e-06	Gpc1				20828.6	1.12857	0.063168	17.8662	2.16254e-71	4.0804e-70	Krt7
		6325.71	-0.770345	0.109812	-7.01515	2.29706e-12	6.99027e-11	Me1				1456.61	1.12844	0.0742882	15.1901	4.11442e-52	5.34807e-51	Polr3e
		271.271	-0.770551	0.191767	-4.01817	5.86519e-05	0.000484721	Thsd1				6038.33	1.12829	0.0818724	13.7811	3.31135e-43	3.53592e-42	Dbndd2
		2990.36	-0.775789	0.0995001	-7.79687	6.34622e-15	2.72414e-13	Cerk				267.127	1.12731	0.150825	7.47434	7.7595e-14	2.89981e-13	Mapt
		628.099	-0.777911	0.186965	-4.16074	3.17219e-05	0.000284035	Dclre1c				2612.55	1.12665	0.0793471	14.199	9.28738e-46	1.0537e-44	Abcg1
		235.162	-0.778247	0.186367	-4.17589	2.96821e-05	0.00026794	Cdc7				709.224	1.12642	0.0904797	12.4494	1.40909e-35	1.22543e-34	H2-Ke6
		1044.27	-0.781217	0.204091	-3.82779	0.000129299	0.000978587	Gm11110				56210.6	1.12627	0.0525286	21.4411	5.52711e-102	1.59871e-100	Calr
		132.025	-0.781989	0.187402	-4.17279	3.00893e-05	0.000271276	4921536K21Rik				335.912	1.1261	0.15156	7.43007	1.08542e-13	4.0268e-13	Mn1
		2007.41	-0.783123	0.183929	-4.25774	2.06505e-05	0.000192328	Tbc1d30				1545.18	1.12552	0.09521	11.8214	3.02478e-32	2.37546e-31	1700025G04Rik
		244.246	-0.788197	0.202306	-3.89607	9.77661e-05	0.000762406	Actr3b				362.76	1.12485	0.120461	9.3379	9.8268e-21	5.00305e-20	Reps2
		444.423	-0.789543	0.16421	-4.80814	1.52341e-06	1.82011e-05	Depdc7				14292.7	1.12454	0.0674296	16.6772	1.92048e-62	3.02998e-61	Itfg3
		10356.7	-0.791138	0.200798	-3.93997	8.1493e-05	0.000650468	5031439G07Rik				1098.76	1.12451	0.0842819	13.3422	1.31454e-40	1.30734e-39	Tmem8
		1031.35	-0.794173	0.138353	-5.74017	9.4579e-09	1.70006e-07	Cry1				401.384	1.12397	0.115179	9.75848	1.69671e-22	9.39886e-22	Cd320
		1557.05	-0.79435	0.181315	-4.38106	1.18103e-05	0.000116006	Abcd4				5006.02	1.12271	0.0651345	17.2368	1.40547e-66	2.40744e-65	Nop56
		6451.72	-0.794576	0.198156	-4.00986	6.07548e-05	0.000500089	Pgm2				725.387	1.12192	0.100673	11.1442	7.63958e-29	5.32209e-28	Dll1
		848.165	-0.795245	0.156002	-5.09766	3.43883e-07	4.71405e-06	Adamts5				2406.18	1.12149	0.0776658	14.44	2.89922e-47	3.4068e-46	Hacd2
		426.399	-0.798274	0.173169	-4.60979	4.03078e-06	4.38446e-05	Fam131b				161.627	1.12144	0.206835	5.42192	5.89633e-08	1.56217e-07	M1ap
		16815.9	-0.800599	0.157466	-5.08425	3.69077e-07	5.03064e-06	Egln1				813.335	1.12134	0.116373	9.63569	5.65118e-22	3.04397e-21	Npr3
		2432.73	-0.80173	0.163914	-4.89117	1.00236e-06	1.23618e-05	Sorbs3				692.009	1.12115	0.112447	9.97043	2.05328e-23	1.17533e-22	Entpd6
		1763.47	-0.802353	0.119598	-6.70873	1.96321e-11	5.21829e-10	Gla				432.443	1.11903	0.11357	9.85315	6.64273e-23	3.73606e-22	Ctf1
		340.645	-0.804026	0.156178	-5.14815	2.63074e-07	3.68355e-06	Efhc1				5833.41	1.11883	0.0664882	16.8275	1.53547e-63	2.47445e-62	Erap1
		524.942	-0.80439	0.13269	-6.06219	1.34281e-09	2.66707e-08	Spata7				200.971	1.11867	0.169562	6.5974	4.18425e-11	1.35636e-10	Krt10
		7507.06	-0.807087	0.127237	-6.34316	2.25105e-10	5.01862e-09	Zfand2a				1198.68	1.11863	0.0843541	13.2611	3.88934e-40	3.80337e-39	Sardh
		7621.8	-0.807108	0.146335	-5.51547	3.47854e-08	5.65853e-07	Sgcb				2429.8	1.11832	0.0673731	16.5989	7.1019e-62	1.10177e-60	Als2cl
		6289.71	-0.808662	0.201207	-4.01905	5.84334e-05	0.00048347	Plxdc1				972.067	1.11805	0.100052	11.1746	5.42715e-29	3.79588e-28	Sh3rf2
		3760.7	-0.808996	0.182865	-4.424	9.68879e-06	9.69553e-05	Lss				308.836	1.11779	0.138966	8.04366	8.71949e-16	3.56108e-15	Unc13b
		450.934	-0.815301	0.181167	-4.50028	6.78643e-06	7.02584e-05	Mab21l3				357.564	1.11735	0.120604	9.26462	1.9578e-20	9.84072e-20	Lin52
		365.255	-0.81598	0.204548	-3.98918	6.63016e-05	0.000541714	Fam89a				397.741	1.11693	0.127569	8.75552	2.03158e-18	9.35144e-18	Ero1lb
		1011.17	-0.816233	0.197978	-4.12285	3.74212e-05	0.000330945	AU018091				18448.4	1.1169	0.0556819	20.0585	1.7013e-89	4.15922e-88	Tax1bp3
		829.95	-0.817143	0.16553	-4.93653	7.95228e-07	1.00222e-05	Meis2				12850.9	1.11643	0.0867207	12.8739	6.31275e-38	5.85421e-37	Ap3s1
		209.433	-0.818207	0.177373	-4.61291	3.9707e-06	4.32873e-05	Cdnf				172.363	1.11606	0.176843	6.31101	2.77226e-10	8.55124e-10	Rragd
		488.75	-0.819238	0.155097	-5.28211	1.27706e-07	1.89127e-06	St3gal5				1094.53	1.1157	0.0836579	13.3365	1.41937e-40	1.40893e-39	Gpr180
		1864.48	-0.819957	0.11827	-6.93294	4.1217e-12	1.20959e-10	Cdkn2c				1291.74	1.11513	0.0758024	14.711	5.48242e-49	6.66543e-48	Atp6v0e2
		114.413	-0.82208	0.215123	-3.82144	0.000132674	0.000999806	Igfbp4				4653.05	1.11287	0.0812378	13.6989	1.03017e-42	1.08608e-41	Tmem176b
		961.598	-0.823995	0.180236	-4.57174	4.8368e-06	5.17894e-05	Impa2				1605.16	1.11235	0.0920431	12.0851	1.26667e-33	1.04572e-32	Hs3st3b1
		1074.26	-0.824261	0.142032	-5.80337	6.49971e-09	1.19828e-07	Tstd3				7470.43	1.11193	0.0636666	17.4649	2.65011e-68	4.68156e-67	4833439L19Rik
		3658.03	-0.827785	0.115268	-7.1814	6.90024e-13	2.23985e-11	Fads3				14047.8	1.11167	0.0503649	22.0724	5.82168e-108	1.81345e-106	Gps1
		551.644	-0.829165	0.155948	-5.31694	1.05528e-07	1.57908e-06	Lipe				438.804	1.1116	0.121106	9.17879	4.35949e-20	2.16235e-19	Ap4s1
		2311.75	-0.832902	0.211555	-3.93705	8.24899e-05	0.000655724	Gbe1				625.528	1.1109	0.115872	9.58729	9.04246e-22	4.81969e-21	Dph1
		8979.05	-0.833081	0.0898892	-9.26787	1.89904e-20	1.50045e-18	Zkscan17				9329.49	1.1098	0.0628087	17.6695	7.19815e-70	1.30968e-68	Cpeb4
		826.567	-0.835261	0.135345	-6.17134	6.77155e-10	1.40715e-08	Thbs3				86.2705	1.10948	0.235841	4.70436	2.54659e-06	6.02793e-06	Pcdhga6
		532.252	-0.838663	0.166843	-5.02665	4.99132e-07	6.59698e-06	Hyls1				862.545	1.10917	0.087543	12.6701	8.66491e-37	7.81971e-36	2010320M18Rik
		814.091	-0.839771	0.150606	-5.57596	2.46169e-08	4.09711e-07	Ccdc77				2489.98	1.10909	0.072461	15.3061	6.96407e-53	9.18826e-52	Gnl3
		3088.08	-0.844735	0.177125	-4.76915	1.85006e-06	2.17886e-05	Snx10				125.61	1.10796	0.206825	5.35698	8.46252e-08	2.21566e-07	Plaur
		1332.8	-0.844881	0.198401	-4.25845	2.05852e-05	0.000191969	Mttp				5735.12	1.1079	0.0526613	21.0381	2.93764e-98	7.9715e-97	Txnrd1
		178.644	-0.844934	0.17982	-4.69879	2.61711e-06	3.00112e-05	Egr2				1630.87	1.10675	0.0864002	12.8096	1.4484e-37	1.33224e-36	Mars2
		1413.53	-0.845692	0.166463	-5.08036	3.76723e-07	5.12514e-06	Tonsl				6133.7	1.10575	0.0559334	19.769	5.50385e-87	1.30318e-85	Aktip
		859.36	-0.845785	0.144139	-5.86785	4.41491e-09	8.30974e-08	Stk36				23063.1	1.10535	0.055472	19.9262	2.41318e-88	5.80081e-87	Rab15
		779.801	-0.846922	0.200524	-4.22355	2.40484e-05	0.000220828	Lrrn4cl				2058.38	1.10408	0.206631	5.34326	9.12921e-08	2.38428e-07	Bst2
		1029.36	-0.847151	0.132401	-6.3984	1.57017e-10	3.58967e-09	Nacad				563.743	1.10226	0.11264	9.78572	1.29674e-22	7.20596e-22	2810468N07Rik
		5342.62	-0.850143	0.130277	-6.52564	6.77115e-11	1.65032e-09	Aebp1				1916.93	1.10116	0.0976226	11.2798	1.65197e-29	1.18106e-28	Acpp
		3065.06	-0.852266	0.139208	-6.12225	9.22648e-10	1.87397e-08	Lpar1				5569	1.10094	0.0689312	15.9715	2.0178e-57	2.9209e-56	Fam102a
		167.141	-0.852324	0.18133	-4.70041	2.59645e-06	2.97981e-05	Hfe				5580.59	1.09991	0.0590347	18.6316	1.7815e-77	3.71176e-76	Lmf1
		97.1329	-0.855152	0.21802	-3.92235	8.76889e-05	0.000692267	Car7				3671.65	1.09935	0.0615697	17.8555	2.62155e-71	4.92883e-70	Cisd2
		2981.23	-0.857076	0.193553	-4.42812	9.50565e-06	9.53217e-05	Itgb3				23685.6	1.09875	0.0481727	22.8086	3.76626e-115	1.29025e-113	Cd81
		2199.71	-0.858183	0.17503	-4.90307	9.43492e-07	1.17264e-05	Spidr				23565.9	1.0987	0.054084	20.3148	9.52319e-92	2.38351e-90	Tm9sf2
		931.251	-0.861604	0.120455	-7.1529	8.49654e-13	2.72724e-11	Hspa2				191.933	1.09857	0.176284	6.2318	4.61095e-10	1.40345e-09	Cldn23
		2771.86	-0.862759	0.15512	-5.56187	2.66901e-08	4.41153e-07	Ccdc136				7677.85	1.09783	0.0513307	21.3873	1.75279e-101	4.98771e-100	Nomo1
		2040.51	-0.862899	0.127594	-6.76283	1.35319e-11	3.72776e-10	Snrnp48				2523.21	1.09725	0.0605906	18.1093	2.69128e-73	5.21514e-72	Eny2
		318.73	-0.863059	0.172068	-5.01579	5.28168e-07	6.91717e-06	Ell3				75.5765	1.09645	0.255267	4.29531	1.7445e-05	3.86354e-05	Pcdhb8
		315.716	-0.864085	0.141453	-6.10864	1.00481e-09	2.03223e-08	Trim46				19525.6	1.09521	0.0770509	14.2142	7.48278e-46	8.52637e-45	Ctns
		3685.86	-0.866133	0.106829	-8.10767	5.16013e-16	2.54119e-14	Grb14				1343.6	1.09434	0.0701924	15.5906	8.43516e-55	1.16245e-53	Pogk
		6853.39	-0.869987	0.144572	-6.01767	1.76943e-09	3.45712e-08	Hmgb2				3716.63	1.09373	0.0547825	19.9649	1.11233e-88	2.682e-87	Ak3
		775.62	-0.871333	0.224712	-3.87756	0.00010551	0.000817032	Ccdc109b				10377.8	1.09211	0.0720808	15.1511	7.4464e-52	9.60009e-51	Mia3
		360.276	-0.871931	0.224862	-3.87763	0.000105477	0.000817032	Nphp4				2214.92	1.09186	0.0757079	14.4221	3.75843e-47	4.40987e-46	Ern1
		162.857	-0.872728	0.208385	-4.18806	2.81353e-05	0.000255581	Alpl				1892.87	1.09154	0.067106	16.2658	1.72512e-59	2.59227e-58	Plekha3
		752.763	-0.873433	0.183755	-4.75324	2.00187e-06	2.3404e-05	Tbc1d16				876.547	1.09149	0.0838232	13.0214	9.24897e-39	8.76238e-38	Zdhhc24
		990.037	-0.874183	0.21506	-4.06484	4.80652e-05	0.000406814	Slco2a1				10029.8	1.09076	0.0577429	18.8899	1.37985e-79	2.97298e-78	Itm2c
		3507.59	-0.874648	0.183499	-4.76651	1.87448e-06	2.20221e-05	Bcl6				7091.29	1.09052	0.0528539	20.6327	1.39733e-94	3.59413e-93	Agap1
		583.433	-0.875824	0.199739	-4.38484	1.16069e-05	0.000114242	Gm13157				1209.23	1.0901	0.0740704	14.717	5.01175e-49	6.10259e-48	Mief2
		267.512	-0.878381	0.167295	-5.2505	1.51686e-07	2.21886e-06	Lrrc27				820.243	1.08886	0.0935498	11.6393	2.60075e-31	1.97755e-30	Rassf6
		1541.25	-0.878912	0.0980992	-8.95942	3.2639e-19	2.235e-17	Ino80c				3345.98	1.08862	0.0760384	14.3167	1.72077e-46	1.98222e-45	Epg5
		214.393	-0.879738	0.187277	-4.69751	2.63349e-06	3.01749e-05	Spred3				6346.14	1.08793	0.0575323	18.9098	9.46364e-80	2.04739e-78	Kat2b
		165.42	-0.880235	0.177262	-4.96573	6.84441e-07	8.73315e-06	Srrm4os				12200	1.08695	0.0620136	17.5277	8.8102e-69	1.56865e-67	Trappc10
		5340.77	-0.88124	0.199304	-4.42159	9.79792e-06	9.79111e-05	Hk2				1767.48	1.08619	0.072419	14.9987	7.48685e-51	9.47434e-50	Bysl
		2099.1	-0.882769	0.10894	-8.10328	5.3499e-16	2.62414e-14	Ppfibp2				5366.4	1.08585	0.0641519	16.9262	2.8837e-64	4.72922e-63	Mars
		283.104	-0.882893	0.227793	-3.87585	0.000106251	0.000822333	Sgcd				2061.25	1.08509	0.0646155	16.7931	2.74258e-63	4.40178e-62	Dbt
		2135.14	-0.886954	0.174834	-5.07312	3.9134e-07	5.30413e-06	Fam20a				20734.5	1.08404	0.0608779	17.8068	6.26297e-71	1.16778e-69	Uggt1
		1911.75	-0.887801	0.196607	-4.51561	6.31333e-06	6.58822e-05	Sectm1b				1034.6	1.08367	0.0784706	13.8098	2.22367e-43	2.38253e-42	Exoc6
		6446.21	-0.888118	0.097866	-9.07484	1.13848e-19	8.22678e-18	Zfp703				468.544	1.08326	0.157408	6.88188	5.9068e-12	2.01091e-11	Reck
		828.082	-0.888885	0.190012	-4.67806	2.89602e-06	3.27912e-05	Nadk2				1265.35	1.08288	0.0795834	13.6069	3.64475e-42	3.79945e-41	Ccdc86
		736.976	-0.890757	0.135162	-6.59031	4.3891e-11	1.10535e-09	Fam110c				400.172	1.0817	0.120209	8.99851	2.28802e-19	1.10133e-18	Tmem116
		852.97	-0.892096	0.200073	-4.45884	8.24027e-06	8.3565e-05	Dusp10				37213.3	1.08036	0.0451931	23.9053	2.69596e-126	1.04101e-124	Golph3
		558.225	-0.892802	0.134727	-6.62673	3.43196e-11	8.79707e-10	Afmid				5120.1	1.07982	0.0572602	18.8581	2.52179e-79	5.38927e-78	Vma21
		254.84	-0.893312	0.205371	-4.34975	1.36296e-05	0.000132517	Ampd3				293.942	1.0795	0.146057	7.391	1.45728e-13	5.36728e-13	Pcdhb7
		2196.91	-0.895353	0.168906	-5.3009	1.15231e-07	1.71357e-06	Lig1				937.82	1.07871	0.25973	4.15319	3.27869e-05	7.09992e-05	Igtp
		20177.4	-0.896	0.219552	-4.08103	4.48366e-05	0.000384237	Cpt1a				5632.54	1.07305	0.0551376	19.4614	2.33387e-84	5.34185e-83	Etnk1
		357.906	-0.896336	0.183777	-4.87729	1.07553e-06	1.31403e-05	Gpr39				4091.15	1.07274	0.0813014	13.1947	9.41603e-40	9.13997e-39	Frmd4b
		409.097	-0.897516	0.200902	-4.46744	7.91627e-06	8.06775e-05	Xrcc2				6476.92	1.07159	0.0672175	15.9421	3.23277e-57	4.66683e-56	S100a1
		529.812	-0.900647	0.215484	-4.17965	2.91953e-05	0.000263877	Arhgef4				5159.89	1.07155	0.0640709	16.7244	8.71127e-63	1.38407e-61	Tmem135
		174.896	-0.90128	0.202046	-4.46076	8.16705e-06	8.29394e-05	Rnf32				8624.08	1.07109	0.0603331	17.753	1.63342e-70	3.01361e-69	Naga
		7095.43	-0.903217	0.1411	-6.40124	1.54117e-10	3.52899e-09	Litaf				8226.56	1.06997	0.0477746	22.3961	4.29322e-111	1.37811e-109	Tob2
		656.05	-0.903843	0.132446	-6.82426	8.83823e-12	2.50678e-10	Gsg2				2301.7	1.06945	0.0789782	13.5411	8.94144e-42	9.23559e-41	Magi1
		236.011	-0.904281	0.18358	-4.9258	8.40143e-07	1.05513e-05	D630039A03Rik				942.881	1.0691	0.0892813	11.9745	4.83308e-33	3.89632e-32	Fam118b
		2552.57	-0.907541	0.140218	-6.47236	9.64839e-11	2.28197e-09	Dock6				4135.9	1.06886	0.102955	10.3818	3.00014e-25	1.84938e-24	Ifi27
		6761.11	-0.908326	0.23518	-3.86227	0.00011234	0.000864799	Gm12070				193480	1.06821	0.0590949	18.0762	4.90821e-73	9.46464e-72	Timp2
		901.825	-0.909283	0.121075	-7.51008	5.90902e-14	2.19565e-12	Cry2				1419.73	1.06709	0.081714	13.0589	5.65751e-39	5.39222e-38	Inafm2
		20221.5	-0.909473	0.181071	-5.02276	5.0935e-07	6.70738e-06	Ucp2				36608.8	1.06634	0.0641912	16.6119	5.71183e-62	8.88739e-61	Srebf1
		1606.79	-0.910184	0.147333	-6.17772	6.50352e-10	1.35931e-08	Insig1				2571.89	1.0661	0.0908712	11.732	8.73839e-32	6.76497e-31	Heatr1
		12104.1	-0.910531	0.164981	-5.51899	3.40957e-08	5.56522e-07	Gys1				1518.11	1.06551	0.0766521	13.9006	6.28362e-44	6.81574e-43	Fbxo33
		1567.48	-0.910603	0.225526	-4.03769	5.39804e-05	0.00045061	Rnf144b				964.471	1.0638	0.0889008	11.9661	5.34882e-33	4.3055e-32	Pcdhb17
		1367.38	-0.911258	0.226331	-4.02622	5.66804e-05	0.000470048	Snx30				7911.52	1.06323	0.0898079	11.8389	2.45605e-32	1.93845e-31	Map3k1
		676.463	-0.911668	0.165743	-5.5005	3.78721e-08	6.11224e-07	Rap1gap				1622.99	1.0631	0.0723743	14.6889	7.59521e-49	9.19871e-48	Iscu
		21871.3	-0.912776	0.229912	-3.97012	7.1837e-05	0.000581326	Nfic				2723.63	1.06254	0.0686647	15.4744	5.16716e-54	7.01074e-53	Atf6b
		5344.83	-0.91485	0.175175	-5.22249	1.76535e-07	2.54112e-06	Smad1				890.615	1.06206	0.0885387	11.9955	3.75184e-33	3.03861e-32	Dhrs11
		846.562	-0.915296	0.125304	-7.30459	2.7811e-13	9.54467e-12	Slc22a4				62034.7	1.06119	0.176444	6.01433	1.80634e-09	5.28678e-09	Fat1
		1093.53	-0.917086	0.223839	-4.09708	4.18399e-05	0.000364641	Rassf10				2673.75	1.05993	0.262141	4.04335	5.26921e-05	0.000112258	Il17b
		419.62	-0.91882	0.137673	-6.67393	2.49039e-11	6.53501e-10	Irf5				2172.32	1.05984	0.0697067	15.2043	3.31343e-52	4.32472e-51	Slc17a5
		352.263	-0.91939	0.141236	-6.50963	7.53384e-11	1.82385e-09	Clec2f				4049.68	1.05907	0.0665098	15.9234	4.35678e-57	6.27798e-56	8430419L09Rik
		3440.83	-0.920029	0.198883	-4.62599	3.72811e-06	4.09851e-05	Pfkfb3				2401.73	1.05856	0.200939	5.26805	1.37879e-07	3.55514e-07	Ednra
		2189.2	-0.920426	0.150824	-6.10264	1.0433e-09	2.10712e-08	Dnm1				8276.32	1.05711	0.059748	17.6928	4.76891e-70	8.72715e-69	Tgoln1
		118.876	-0.921306	0.19675	-4.68262	2.83237e-06	3.21972e-05	1700061I17Rik				1526.48	1.05686	0.068182	15.5006	3.43694e-54	4.67928e-53	Samd10
		1079.31	-0.922069	0.135633	-6.79824	1.05904e-11	2.97442e-10	Sema4g				560.343	1.05667	0.111749	9.45572	3.20806e-21	1.66826e-20	Coa7
		18365	-0.924111	0.204241	-4.52462	6.05054e-06	6.33698e-05	Bnip3				2475.06	1.05607	0.0773403	13.6549	1.88813e-42	1.97609e-41	N4bp2
		29152	-0.92585	0.110779	-8.35766	6.39762e-17	3.48476e-15	Hr				16170.3	1.05516	0.0539419	19.5611	3.31525e-85	7.69968e-84	Pkp4
		2159.55	-0.929951	0.13413	-6.9332	4.11436e-12	1.20959e-10	Oplah				986.09	1.05482	0.102181	10.3231	5.54295e-25	3.3708e-24	Slc10a3
		4825.74	-0.93046	0.144379	-6.44458	1.15922e-10	2.69735e-09	Afap1l2				3277.75	1.05329	0.0590581	17.8348	3.79139e-71	7.11134e-70	Enpp4
		377.363	-0.930627	0.194582	-4.78271	1.72947e-06	2.04354e-05	Arhgap22				2913.55	1.05278	0.0702641	14.9832	9.45055e-51	1.18926e-49	Dennd1b
		249.181	-0.930717	0.205358	-4.53216	5.83843e-06	6.13718e-05	Dpysl5				178.823	1.05231	0.210905	4.98951	6.05327e-07	1.49608e-06	Oas1b
		600.696	-0.930804	0.198543	-4.68818	2.75642e-06	3.14333e-05	Mmd				2763.1	1.05146	0.0604664	17.3892	9.95685e-68	1.72991e-66	Prss8
		145.514	-0.932355	0.190242	-4.90089	9.54045e-07	1.18473e-05	Gm10636				703.013	1.05103	0.0947368	11.0942	1.33896e-28	9.27872e-28	Crb3
		1478.53	-0.935814	0.240545	-3.89039	0.000100083	0.000778785	Rcor2				139.144	1.04992	0.235198	4.46399	8.04471e-06	1.8299e-05	Cldn7
		7507.5	-0.937076	0.113053	-8.28885	1.14345e-16	6.01167e-15	Slc7a5				2263.5	1.04895	0.0667128	15.7234	1.04607e-55	1.47505e-54	Atad3a
		600.961	-0.937635	0.167434	-5.60002	2.14328e-08	3.60472e-07	Slc19a2				570.001	1.04786	0.10192	10.2812	8.56428e-25	5.1644e-24	Kifc2
		1509.75	-0.938407	0.242592	-3.86826	0.000109617	0.000846387	Slc22a23				441.49	1.04745	0.12534	8.35689	6.43959e-17	2.75835e-16	2610528J11Rik
		421.214	-0.938882	0.195279	-4.80791	1.5252e-06	1.82011e-05	Anpep				3539.09	1.0449	0.064459	16.2104	4.26074e-59	6.35409e-58	Ndufc2
		602.087	-0.938882	0.187097	-5.01817	5.21673e-07	6.85082e-06	Dgat2				222.052	1.04466	0.167344	6.2426	4.30356e-10	1.31412e-09	Zfp420
		1925.8	-0.941031	0.201254	-4.67585	2.92745e-06	3.30689e-05	Aaed1				9277.67	1.04329	0.0714588	14.5999	2.81271e-48	3.36524e-47	Ddx21
		283.405	-0.942295	0.195371	-4.8231	1.41345e-06	1.69802e-05	Itga2b				1991.42	1.04235	0.0680125	15.3258	5.14009e-53	6.80448e-52	Opa3
		222.928	-0.942302	0.171734	-5.48699	4.08837e-08	6.53957e-07	Ttc9				943.107	1.03917	0.0904572	11.488	1.51604e-30	1.12144e-29	Elac1
		868.534	-0.943103	0.172816	-5.45727	4.83498e-08	7.66561e-07	Atf3				95.495	1.03839	0.230571	4.50357	6.68227e-06	1.52814e-05	Rbms3
		3682.56	-0.943633	0.102897	-9.17069	4.70009e-20	3.50193e-18	Sord				6250.51	1.03566	0.072519	14.2812	2.86613e-46	3.29438e-45	Slc5a8
		162.455	-0.945552	0.221189	-4.27487	1.91249e-05	0.000180575	Ctsw				76.0246	1.03488	0.27211	3.80317	0.000142859	0.00029297	C1rl
		439.38	-0.946428	0.17628	-5.36889	7.9221e-08	1.21204e-06	Abcc3				136.927	1.03486	0.200063	5.17269	2.30745e-07	5.85502e-07	Plxnb3
		1818.8	-0.948108	0.137342	-6.90324	5.08279e-12	1.47957e-10	Casq2				10867.2	1.03181	0.0454536	22.7003	4.44963e-114	1.50156e-112	Ildr1
		226.528	-0.948833	0.190737	-4.97456	6.53969e-07	8.41152e-06	B3gat2				276.385	1.03134	0.143794	7.17235	7.3719e-13	2.62928e-12	Ang2
		7381.79	-0.950216	0.233211	-4.07448	4.61165e-05	0.000393753	Vldlr				12549.9	1.03082	0.0642889	16.0342	7.36949e-58	1.07765e-56	Anxa3
		680.545	-0.955187	0.156575	-6.10053	1.0572e-09	2.12623e-08	Arntl2				1342.66	1.03035	0.0831593	12.3901	2.95706e-35	2.5464e-34	Gprc5a
		1424.52	-0.956309	0.186576	-5.12558	2.96617e-07	4.12112e-06	Gsap				3108.81	1.03025	0.0612026	16.8334	1.38995e-63	2.24682e-62	Manf
		199.175	-0.957216	0.241118	-3.9699	7.1903e-05	0.000581533	Nme5				2077.88	1.02989	0.0848743	12.1343	6.9528e-34	5.7762e-33	Rasef
		1903.16	-0.958488	0.209167	-4.5824	4.5966e-06	4.95124e-05	Ifi202b				374.876	1.02979	0.135447	7.60294	2.89467e-14	1.10665e-13	Chrnb2
		2615.6	-0.959031	0.203879	-4.70392	2.55215e-06	2.93599e-05	Slc16a1				1350.87	1.02879	0.0775692	13.2628	3.80234e-40	3.72059e-39	Bag5
		1781.63	-0.959054	0.19167	-5.00368	5.6245e-07	7.33276e-06	Bcl2l11				1161.46	1.02866	0.0784125	13.1186	2.57612e-39	2.47323e-38	Creld2
		226.788	-0.959742	0.170059	-5.64359	1.66545e-08	2.8477e-07	Fcho1				266.136	1.02849	0.142617	7.21155	5.53175e-13	1.98327e-12	Pcdhb19
		681.777	-0.960055	0.15476	-6.2035	5.5222e-10	1.16778e-08	Parp16				189.792	1.02841	0.182628	5.63116	1.79e-08	4.91813e-08	Tmem56
		355.159	-0.960204	0.17872	-5.37268	7.75746e-08	1.18926e-06	Gadd45a				2936.78	1.02777	0.0720663	14.2615	3.80265e-46	4.35815e-45	Tsr1
		2390.65	-0.961671	0.201656	-4.76887	1.85264e-06	2.18011e-05	Mr1				71.8042	1.02718	0.271682	3.78083	0.000156308	0.000319103	Rsad2
		736.827	-0.962814	0.217044	-4.43604	9.16307e-06	9.22078e-05	Nrm				70.7089	1.0266	0.29289	3.50507	0.000456489	0.000887193	Pglyrp1
		4831.14	-0.964731	0.175621	-5.49326	3.9458e-08	6.35393e-07	Mmp2				6984.19	1.02624	0.0596673	17.1994	2.68444e-66	4.56847e-65	Atp6v0a1
		299.235	-0.968063	0.224025	-4.32124	1.55157e-05	0.000148942	Rgl1				33451.8	1.02613	0.0485407	21.1396	3.43849e-99	9.49372e-98	Tm9sf3
		2157.59	-0.969414	0.230541	-4.20495	2.61144e-05	0.000238429	Padi2				10906.1	1.02588	0.0815468	12.5802	2.71289e-36	2.41243e-35	Vars
		107.318	-0.970248	0.219916	-4.4119	1.02465e-05	0.00010211	Ttc25				35212	1.0239	0.0484936	21.1141	5.90655e-99	1.61948e-97	Dbi
		685.644	-0.971638	0.239365	-4.05924	4.9233e-05	0.000415232	Arhgap18				877.177	1.02375	0.0971494	10.5379	5.77711e-26	3.66417e-25	Slc45a3
		356.525	-0.97228	0.240776	-4.03812	5.38823e-05	0.000450481	Rad51				1227.94	1.02332	0.0816997	12.5254	5.42402e-36	4.78289e-35	Rasa2
		2609.83	-0.973839	0.127918	-7.61301	2.67784e-14	1.03793e-12	Rnf157				2880.12	1.02083	0.0632828	16.1312	1.53992e-58	2.27077e-57	Srprb
		1835.83	-0.973993	0.152722	-6.37754	1.79956e-10	4.06242e-09	Cdt1				2891.51	1.02008	0.0664789	15.3444	3.85938e-53	5.13057e-52	Isca1
		694.79	-0.974069	0.248821	-3.91473	9.05055e-05	0.000711887	Hcar2				6060.26	1.01896	0.0604171	16.8655	8.07154e-64	1.31011e-62	Ctage5
		261.468	-0.980728	0.190632	-5.14461	2.68083e-07	3.74275e-06	Kif9				3754.33	1.01864	0.0757616	13.4453	3.2806e-41	3.34693e-40	Pprc1
		9221.77	-0.980785	0.18929	-5.1814	2.20229e-07	3.12376e-06	Pdk1				5074.97	1.01848	0.0792021	12.8593	7.62932e-38	7.06686e-37	Nolc1
		272.927	-0.980817	0.139618	-7.02498	2.14101e-12	6.55057e-11	Sh2d5				4232.6	1.01738	0.0589657	17.2538	1.047e-66	1.7973e-65	Cdc42se2
		388.64	-0.982914	0.177455	-5.53896	3.0427e-08	4.99475e-07	Mcm8				14023	1.01692	0.0639601	15.8994	6.40193e-57	9.19542e-56	Lrp6
		963.785	-0.983493	0.112463	-8.74504	2.22945e-18	1.41856e-16	Gm10845				52.3503	1.01582	0.289296	3.51134	0.000445853	0.000867376	Il17d
		332.027	-0.98747	0.235606	-4.19119	2.77498e-05	0.000252558	Oscp1				1225.32	1.01572	0.0795296	12.7716	2.36204e-37	2.16128e-36	Rgmb
		6885.75	-0.987886	0.22079	-4.47431	7.66575e-06	7.84022e-05	Ivns1abp				486.732	1.01567	0.124751	8.14156	3.90213e-16	1.62004e-15	Ankrd35
		1970.68	-0.99004	0.152876	-6.47612	9.41108e-11	2.23184e-09	Mafb				892.579	1.01507	0.0925925	10.9628	5.76866e-28	3.9337e-27	Ppm1k
		1500.3	-0.99079	0.118849	-8.33655	7.64865e-17	4.10402e-15	Cyp39a1				5555.04	1.01329	0.0655404	15.4605	6.41209e-54	8.68491e-53	Dab2ip
		86.2609	-0.991635	0.250081	-3.96526	7.33175e-05	0.000591974	Lnx1				503.495	1.01308	0.104597	9.68558	3.47217e-22	1.88894e-21	Sdhaf1
		194.558	-0.994848	0.16245	-6.12401	9.12464e-10	1.85853e-08	Ano9				3172.11	1.01142	0.0650819	15.5407	1.84043e-54	2.52309e-53	Wdr77
		348.47	-0.997022	0.254613	-3.91582	9.00962e-05	0.00070952	Cdc42ep2				1129.77	1.01036	0.0854566	11.823	2.96734e-32	2.33266e-31	Creg1
		98.7818	-0.997224	0.201245	-4.95528	7.22279e-07	9.19962e-06	Slc52a3				1589.83	1.00941	0.0826832	12.2082	2.80993e-34	2.35924e-33	Naglu
		879.113	-1.00124	0.26086	-3.83825	0.000123917	0.000943815	Rttn				2682.66	1.00903	0.0605832	16.6553	2.76786e-62	4.33659e-61	Ppapdc2
		379.909	-1.00153	0.148381	-6.74974	1.48114e-11	4.04919e-10	Ccdc138				13188.9	1.00829	0.0854801	11.7956	4.11093e-32	3.21884e-31	Ide
		506.284	-1.00423	0.220013	-4.56443	5.00841e-06	5.33884e-05	Gmnn				1621.12	1.00819	0.0798901	12.6197	1.64343e-36	1.47052e-35	Fam107b
		556.162	-1.00446	0.237816	-4.22368	2.40349e-05	0.000220828	Naip2				32715	1.00731	0.055544	18.1354	1.67481e-73	3.26144e-72	Wbp2
		92463.1	-1.00813	0.189538	-5.31886	1.04418e-07	1.56578e-06	Krt5				723.954	1.00726	0.0930733	10.8223	2.70052e-27	1.79955e-26	Scfd2
		531.246	-1.00942	0.135786	-7.4339	1.05441e-13	3.77175e-12	Fam43a				360.457	1.00694	0.126208	7.97843	1.48208e-15	5.99246e-15	Sigirr
		95.0325	-1.00984	0.264091	-3.82382	0.000131398	0.000991869	Glis1				1335.64	1.00565	0.0712257	14.1192	2.89073e-45	3.24703e-44	Dph3
		17387.3	-1.01043	0.166575	-6.06592	1.31197e-09	2.61304e-08	Fzd7				1487.98	1.00561	0.0774294	12.9875	1.44097e-38	1.3554e-37	Rogdi
		1648.71	-1.01118	0.139217	-7.26334	3.77642e-13	1.27548e-11	Mlkl				38189.9	1.00555	0.0616512	16.3103	8.33489e-60	1.26085e-58	Vdr
		1027.95	-1.01203	0.154934	-6.53198	6.4904e-11	1.58728e-09	Kcnab2				1201.97	1.00544	0.073955	13.5953	4.27212e-42	4.44464e-41	Mrps6
		1459.07	-1.0137	0.207241	-4.89141	1.00118e-06	1.23579e-05	Pde4d				100.227	1.00498	0.227739	4.41286	1.02016e-05	2.3003e-05	Tsacc
		18260.6	-1.01438	0.21706	-4.67327	2.96439e-06	3.33552e-05	Tagln2				6611.63	1.00474	0.07501	13.3947	6.49235e-41	6.54331e-40	Dmxl1
		194.383	-1.01573	0.264903	-3.83436	0.000125894	0.000956847	Tnik				22549.5	1.00468	0.0564523	17.7969	7.46683e-71	1.39061e-69	Hid1
		279.841	-1.01768	0.210665	-4.83077	1.36004e-06	1.6366e-05	4930447F24Rik				3035.01	1.00424	0.098207	10.2257	1.521e-24	9.09547e-24	Irgm1
		110.972	-1.01872	0.264213	-3.85566	0.000115416	0.000886106	3110039I08Rik				3437.58	1.00317	0.0847894	11.8313	2.68961e-32	2.1175e-31	Nabp1
		7523.64	-1.0195	0.126865	-8.03609	9.27499e-16	4.46068e-14	Socs3				5237.59	1.00201	0.0706566	14.1814	1.19401e-45	1.35273e-44	Slc11a2
		904.526	-1.02351	0.112888	-9.06656	1.22836e-19	8.8319e-18	Foxj1				3848.3	1.00126	0.0591806	16.9187	3.2737e-64	5.36323e-63	Ufm1
		153.589	-1.02382	0.22098	-4.63308	3.60265e-06	3.98202e-05	Aatk				3562.26	1.00073	0.0631635	15.8435	1.55778e-56	2.22441e-55	Cab39l
		2831.75	-1.02418	0.245059	-4.17934	2.92362e-05	0.000264081	Idi1				2081.56	1.00066	0.0710191	14.09	4.37531e-45	4.88334e-44	Ccdc25
		87.5398	-1.02503	0.254467	-4.02815	5.62184e-05	0.000466487	Gnaz				5620.74	1.00011	0.0550945	18.1526	1.22396e-73	2.39528e-72	Chmp1b
		333.72	-1.02519	0.209736	-4.88801	1.01858e-06	1.25404e-05	Zfand4				350.751	1.00003	0.123812	8.07703	6.63608e-16	2.725e-15	Ung
		154.993	-1.03057	0.183617	-5.61262	1.99281e-08	3.37932e-07	Etv5				14885.5	0.999887	0.0487143	20.5255	1.27367e-93	3.23914e-92	Srpr
		136.087	-1.03145	0.181593	-5.67999	1.34702e-08	2.35361e-07	Garnl3				64.0627	0.998889	0.276215	3.61635	0.000298783	0.000591981	E230013L22Rik
		401.521	-1.03165	0.143146	-7.20698	5.72073e-13	1.87818e-11	Rpgr				449.013	0.99762	0.119225	8.36757	5.88163e-17	2.52483e-16	Prss22
		3035.77	-1.03325	0.114216	-9.0465	1.4763e-19	1.05095e-17	Polm				2100.26	0.9976	0.0642062	15.5374	1.93593e-54	2.65171e-53	Rnf138
		559.764	-1.03373	0.231663	-4.46223	8.11106e-06	8.24873e-05	Gstt1				730.458	0.996781	0.0966492	10.3134	6.13044e-25	3.72091e-24	Simc1
		74.4705	-1.03471	0.263802	-3.92229	8.77128e-05	0.000692267	Plekha6				695.091	0.99559	0.0964033	10.3273	5.30092e-25	3.22735e-24	Txnrd3
		3213.82	-1.03492	0.141627	-7.30732	2.72532e-13	9.37563e-12	Ier5				819.116	0.995436	0.0978828	10.1697	2.70817e-24	1.60428e-23	Ocel1
		2866.65	-1.03501	0.133472	-7.75453	8.86732e-15	3.72842e-13	Blnk				1024.66	0.995239	0.0955873	10.4118	2.18976e-25	1.35619e-24	Fitm2
		132.181	-1.03657	0.190514	-5.44092	5.30056e-08	8.37604e-07	Apobr				1767.87	0.994603	0.0760492	13.0784	4.374e-39	4.18151e-38	Ginm1
		86.3892	-1.03659	0.247942	-4.1808	2.9049e-05	0.00026272	Panx3				362.976	0.99407	0.124461	7.98702	1.38244e-15	5.59675e-15	Tmem42
		305.397	-1.03668	0.188175	-5.50914	3.60583e-08	5.83917e-07	Trip13				222.277	0.993594	0.180291	5.51105	3.56707e-08	9.6036e-08	Sprr1a
		88.1715	-1.03669	0.233492	-4.43992	8.99922e-06	9.08132e-05	4921507P07Rik				1192.04	0.991714	0.0809788	12.2466	1.75215e-34	1.48056e-33	Mrpl16
		20541.2	-1.03727	0.212552	-4.88007	1.0605e-06	1.30008e-05	Rhoq				2754.59	0.991035	0.061879	16.0157	9.9297e-58	1.45069e-56	Gpc4
		730.707	-1.04009	0.119045	-8.73697	2.39456e-18	1.51026e-16	9030617O03Rik				1194.02	0.989934	0.0888453	11.1422	7.81468e-29	5.44168e-28	Slc35d1
		700.38	-1.04194	0.260208	-4.00426	6.22112e-05	0.000511198	Fam122b				14683.3	0.989289	0.0509967	19.3991	7.85355e-84	1.77695e-82	Tmed7
		3551.07	-1.04273	0.128011	-8.14565	3.77236e-16	1.88356e-14	Orai2				1708.42	0.987404	0.0793538	12.4431	1.52539e-35	1.32584e-34	Pcca
		4720.94	-1.04695	0.2533	-4.13323	3.57696e-05	0.000317119	Clasp2				2152.74	0.987371	0.0737767	13.3832	7.57656e-41	7.6069e-40	Ltv1
		211.968	-1.04781	0.207597	-5.04735	4.47978e-07	5.99249e-06	Spata24				1398.09	0.987071	0.0743802	13.2706	3.42738e-40	3.35994e-39	Dclre1b
		88.0925	-1.04952	0.260492	-4.02901	5.60129e-05	0.000465049	Myl6b				6508.21	0.986383	0.0523635	18.8372	3.74036e-79	7.97186e-78	Snx13
		164.114	-1.05047	0.263689	-3.98374	6.78385e-05	0.000553329	Mok				5316.6	0.986101	0.0577783	17.067	2.61423e-65	4.36894e-64	Erlec1
		3836.91	-1.05221	0.208602	-5.04412	4.55605e-07	6.08107e-06	Rell1				149.791	0.984949	0.184036	5.35192	8.70247e-08	2.27622e-07	Rab39b
		325.446	-1.05224	0.219174	-4.80092	1.57934e-06	1.88005e-05	Traip				1386.6	0.984184	0.0727701	13.5246	1.12016e-41	1.15399e-40	N6amt1
		87.0985	-1.05293	0.241898	-4.35278	1.34423e-05	0.000130874	Ablim2				5334.05	0.979967	0.0648567	15.1097	1.3971e-51	1.79531e-50	Tmem248
		407.408	-1.05345	0.240978	-4.37156	1.23363e-05	0.000120842	Col5a2				294.348	0.979594	0.127073	7.70889	1.26917e-14	4.93088e-14	Gm561
		8741.23	-1.0554	0.27411	-3.85029	0.000117978	0.000903369	Hip1				1443.68	0.979099	0.0698817	14.0108	1.33853e-44	1.47415e-43	Ccdc126
		199.335	-1.056	0.269589	-3.91706	8.96366e-05	0.000706675	Suv39h2				772.568	0.977784	0.100756	9.70443	2.88691e-22	1.57761e-21	Rtn4ip1
		258.239	-1.05736	0.256837	-4.11687	3.84054e-05	0.000338193	Lrp8				2754.3	0.976905	0.0743883	13.1325	2.14426e-39	2.06615e-38	Tfap2c
		739.182	-1.05744	0.187403	-5.64258	1.67518e-08	2.86093e-07	Cmbl				1099.47	0.975775	0.078822	12.3795	3.3756e-35	2.90206e-34	Tm2d3
		279.202	-1.05829	0.189551	-5.58312	2.36244e-08	3.94106e-07	Arhgap33				22672	0.974476	0.0729347	13.3609	1.02269e-40	1.02224e-39	Dab2
		395.449	-1.05985	0.242174	-4.37639	1.20663e-05	0.00011844	Poc1a				3036.57	0.974224	0.0624141	15.609	6.31946e-55	8.73169e-54	C2cd2l
		1246.48	-1.06062	0.176201	-6.01941	1.75057e-09	3.42959e-08	Pop1				44970.4	0.973867	0.0762333	12.7748	2.26649e-37	2.07626e-36	Anxa1
		2672.45	-1.0608	0.260983	-4.06465	4.8105e-05	0.000406912	Lpin2				984.303	0.973202	0.0839374	11.5944	4.39995e-31	3.31687e-30	Marveld2
		1484.41	-1.06157	0.163482	-6.49354	8.38452e-11	2.01284e-09	Cep89				4299.53	0.972299	0.0685715	14.1793	1.22986e-45	1.39234e-44	Shroom2
		918.38	-1.06223	0.229641	-4.62564	3.73445e-06	4.09851e-05	Scx				2223.49	0.97222	0.0776673	12.5177	5.9704e-36	5.25588e-35	Pcdhb16
		55.3317	-1.06296	0.256107	-4.15045	3.3182e-05	0.000295819	Slc17a7				1260.71	0.972192	0.0815092	11.9274	8.51926e-33	6.82275e-32	Golm1
		76.8568	-1.063	0.244188	-4.3532	1.34166e-05	0.000130712	Kcnab3				1185.99	0.972058	0.0754558	12.8825	5.64933e-38	5.24515e-37	1810043G02Rik
		87.7635	-1.06621	0.270645	-3.93953	8.16416e-05	0.000650779	Glt1d1				3487.31	0.971683	0.0618339	15.7144	1.20507e-55	1.69622e-54	Ifrd1
		377.852	-1.06669	0.237957	-4.48269	7.37089e-06	7.57637e-05	Cenpl				87.4408	0.971135	0.243448	3.98909	6.63264e-05	0.000140208	Tmem81
		73.3212	-1.06864	0.228645	-4.67378	2.957e-06	3.3309e-05	Gpr132				2411.2	0.971116	0.0624217	15.5573	1.41855e-54	1.9481e-53	Sil1
		340.585	-1.06937	0.191166	-5.59394	2.21967e-08	3.72449e-07	Klhl36				4774.24	0.970909	0.0719216	13.4995	1.57345e-41	1.61465e-40	Ripk4
		60.2854	-1.07114	0.264121	-4.0555	5.00269e-05	0.000421186	Bend6				2049.44	0.9705	0.0629028	15.4286	1.05194e-53	1.41631e-52	Jagn1
		154.02	-1.0716	0.266671	-4.01842	5.85889e-05	0.000484479	Map4k1				398.563	0.969933	0.11227	8.63926	5.65784e-18	2.54934e-17	Tec
		4770.87	-1.07566	0.186426	-5.76988	7.93288e-09	1.4349e-07	Igsf8				1359.84	0.969932	0.0770068	12.5954	2.23768e-36	1.99433e-35	Tmed1
		4155.67	-1.076	0.207857	-5.17666	2.25891e-07	3.19401e-06	Lrrc75b				3369.05	0.969844	0.0705681	13.7434	5.58024e-43	5.93123e-42	Itpr2
		1013.54	-1.07859	0.221057	-4.87923	1.06503e-06	1.30342e-05	4930427A07Rik				9804.06	0.969575	0.072403	13.3914	6.79247e-41	6.83706e-40	Ndrg3
		134.024	-1.09198	0.202184	-5.40089	6.63094e-08	1.02862e-06	Nup210l				2898.38	0.969573	0.0709998	13.656	1.85907e-42	1.94697e-41	Nol4l
		834.925	-1.09233	0.226508	-4.82245	1.41807e-06	1.70073e-05	Trpm6				797.923	0.968693	0.0993968	9.74571	1.92434e-22	1.06188e-21	Lactb
		3154.56	-1.09266	0.142371	-7.67473	1.65763e-14	6.62133e-13	Gpsm2				9158.16	0.968184	0.0852713	11.3542	7.07198e-30	5.1186e-29	Rere
		14012.7	-1.09302	0.205363	-5.32236	1.0243e-07	1.54073e-06	Vegfa				219.312	0.967657	0.149009	6.49397	8.36012e-11	2.66085e-10	Zc3h8
		483.231	-1.09581	0.137808	-7.95176	1.83874e-15	8.42074e-14	Galnt12				948.234	0.9673	0.094048	10.2852	8.21908e-25	4.96003e-24	Fbxo44
		2716.64	-1.09754	0.155338	-7.06547	1.60073e-12	4.97161e-11	Adgrg1				3949.2	0.967038	0.0644945	14.9941	8.02259e-51	1.0128e-49	Fam126b
		126.22	-1.10067	0.240002	-4.58607	4.51674e-06	4.86887e-05	Rab17				92.1793	0.966909	0.239171	4.04276	5.28257e-05	0.000112512	Gm15421
		1278.93	-1.10154	0.165664	-6.64925	2.94584e-11	7.63265e-10	Acacb				11828.6	0.965878	0.0488063	19.79	3.62787e-87	8.61579e-86	Gpx2
		798.608	-1.10326	0.146129	-7.5499	4.3558e-14	1.62692e-12	Mtmr11				5001.16	0.965546	0.0744512	12.9688	1.83782e-38	1.72356e-37	Slc12a4
		400.309	-1.10939	0.271572	-4.08508	4.40623e-05	0.000379707	Maff				1357.88	0.96516	0.075703	12.7493	3.14575e-37	2.87007e-36	Zbtb42
		422.877	-1.11466	0.19679	-5.66422	1.47698e-08	2.55583e-07	Chst3				51597.5	0.964757	0.0606677	15.9023	6.10598e-57	8.7905e-56	Col11a1
		469.299	-1.11517	0.272792	-4.08799	4.35131e-05	0.000376485	Cep128				5305.02	0.964703	0.0654889	14.7308	4.08966e-49	4.9952e-48	Arl8a
		526.928	-1.11733	0.281988	-3.96233	7.4223e-05	0.000598949	Cpm				855.879	0.963647	0.0934585	10.311	6.28702e-25	3.81301e-24	Arsk
		170766	-1.1213	0.182056	-6.1591	7.31575e-10	1.50717e-08	Scd2				2094.23	0.963575	0.0738142	13.0541	6.0246e-39	5.73517e-38	Slc6a9
		6369.77	-1.12673	0.199285	-5.65386	1.56886e-08	2.69859e-07	Elovl6				1755.09	0.96344	0.11594	8.30984	9.58325e-17	4.07508e-16	Hist1h1c
		601.569	-1.12701	0.167495	-6.72866	1.71236e-11	4.61118e-10	Capn5				1963.56	0.963245	0.068375	14.0877	4.52209e-45	5.04004e-44	Mpc2
		15285.1	-1.12941	0.139651	-8.08738	6.09629e-16	2.96164e-14	Bhlhe40				4233.62	0.962012	0.0610457	15.7589	5.96739e-56	8.45229e-55	Trappc9
		577.973	-1.12944	0.230722	-4.89525	9.81801e-07	1.21395e-05	Rad51b				4075.9	0.961224	0.0657292	14.624	1.97418e-48	2.37457e-47	Slc39a11
		209.624	-1.13073	0.26209	-4.31426	1.60139e-05	0.000153316	Dysf				928.332	0.960599	0.112179	8.56313	1.09848e-17	4.87721e-17	Ddit3
		840.069	-1.13282	0.227235	-4.98524	6.18861e-07	7.99571e-06	Asf1b				6339.07	0.959536	0.0508235	18.8798	1.67322e-79	3.59037e-78	Tmem33
		1106.1	-1.13352	0.209585	-5.40842	6.35819e-08	9.87374e-07	Wdr90				4207.51	0.959534	0.0629942	15.2321	2.16496e-52	2.8304e-51	Casp12
		149.33	-1.13649	0.19493	-5.83025	5.53432e-09	1.02821e-07	Scd3				5091.45	0.95942	0.0525627	18.2529	1.96272e-74	3.87951e-73	Gbas
		1300	-1.13789	0.150223	-7.5747	3.59951e-14	1.36213e-12	Dtx4				1844.94	0.956714	0.0724675	13.202	8.54535e-40	8.30503e-39	Aasdhppt
		2611.79	-1.13805	0.12284	-9.26447	1.96047e-20	1.53215e-18	Atg9b				6868.05	0.956372	0.0937007	10.2067	1.85108e-24	1.10276e-23	Krt18
		219.701	-1.13935	0.263714	-4.32039	1.55754e-05	0.000149416	4930579G24Rik				6173.55	0.955971	0.0490898	19.4739	1.8268e-84	4.18732e-83	Pon2
		104.012	-1.13999	0.221715	-5.14169	2.72274e-07	3.79022e-06	Serpinb1a				2750.76	0.955783	0.0654125	14.6116	2.36797e-48	2.84174e-47	Usp31
		1032.54	-1.14448	0.275889	-4.14833	3.34913e-05	0.000298207	Mmp28				2831.57	0.955777	0.0634263	15.0691	2.58641e-51	3.29413e-50	Fam160a2
		2119.86	-1.14946	0.109129	-10.533	6.08317e-26	7.28966e-24	Tspan7				21786	0.953646	0.0453058	21.0491	2.33174e-98	6.33825e-97	Rpn1
		220.769	-1.15006	0.192612	-5.97083	2.36051e-09	4.55625e-08	Gdnf				271.502	0.953452	0.137459	6.93626	4.0263e-12	1.38354e-11	Lrrc75a
		676.511	-1.15064	0.178459	-6.4476	1.13632e-10	2.65264e-09	Rhobtb1				29941.3	0.952982	0.0691819	13.775	3.60334e-43	3.84511e-42	Xdh
		253.568	-1.15233	0.24506	-4.70226	2.57301e-06	2.95526e-05	Ccsap				1562.62	0.952588	0.0972294	9.79732	1.15612e-22	6.43364e-22	Smox
		1095.52	-1.15272	0.183118	-6.29494	3.07516e-10	6.74098e-09	Dram1				1679.3	0.95252	0.0814136	11.6998	1.27817e-31	9.8325e-31	Nol8
		98.899	-1.1533	0.225423	-5.11615	3.11843e-07	4.29943e-06	Dyrk3				1085.09	0.951726	0.0988078	9.6321	5.85237e-22	3.15019e-21	Flrt2
		191.449	-1.15371	0.204373	-5.6451	1.65083e-08	2.82606e-07	Rgn				37073.7	0.951131	0.0571242	16.6502	3.01546e-62	4.71051e-61	Hk1
		1732.39	-1.15376	0.241204	-4.78334	1.72407e-06	2.03883e-05	Ptgr1				495.91	0.951068	0.104605	9.092	9.72317e-20	4.75706e-19	Zmynd19
		732.999	-1.15971	0.2531	-4.58204	4.60457e-06	4.95611e-05	Timeless				3384.74	0.950855	0.0660577	14.3943	5.61861e-47	6.53904e-46	Slc5a9
		842.234	-1.16203	0.126629	-9.17663	4.44809e-20	3.33143e-18	Agpat9				1588.74	0.950798	0.0815663	11.6568	2.1196e-31	1.61792e-30	Rbm48
		82.0446	-1.1632	0.262304	-4.43456	9.22626e-06	9.27208e-05	Lypd6b				1499.27	0.949187	0.0700627	13.5477	8.17766e-42	8.46884e-41	Yrdc
		10802.6	-1.16596	0.19733	-5.90867	3.44871e-09	6.56854e-08	Cyp26b1				340.476	0.948894	0.126828	7.48174	7.33458e-14	2.74881e-13	Tmem160
		464.911	-1.16653	0.275715	-4.23092	2.32736e-05	0.000214535	Flrt3				2793.3	0.948698	0.0643401	14.7451	3.31066e-49	4.05312e-48	Slc38a7
		1380.02	-1.16671	0.16433	-7.0998	1.24939e-12	3.94863e-11	Plat				3729.36	0.948689	0.100361	9.45274	3.30073e-21	1.71588e-20	Irf9
		104.992	-1.1671	0.256858	-4.54375	5.52619e-06	5.83455e-05	Epb4.1l3				251.242	0.948667	0.159102	5.96264	2.48196e-09	7.19089e-09	Rab20
		126.032	-1.17105	0.201319	-5.81686	5.99622e-09	1.10972e-07	Ypel4				7949.24	0.947984	0.0663439	14.2889	2.56465e-46	2.95001e-45	Atp6v0a2
		3129.32	-1.17398	0.223053	-5.26324	1.41537e-07	2.08322e-06	Camta1				226.188	0.947797	0.157267	6.02668	1.6736e-09	4.91011e-09	Ppp2r3d
		115.162	-1.17494	0.235802	-4.98276	6.26838e-07	8.08425e-06	Areg				98.9493	0.947358	0.218987	4.32609	1.51777e-05	3.37704e-05	Tcea2
		120.161	-1.17658	0.239249	-4.91782	8.75142e-07	1.09336e-05	Ccdc148				8509.05	0.946999	0.0677669	13.9744	2.23522e-44	2.45144e-43	Galnt7
		2759.67	-1.17823	0.230914	-5.10246	3.35272e-07	4.60919e-06	Mcm5				1651.65	0.945764	0.0876619	10.7888	3.88992e-27	2.57475e-26	Polr2l
		82.5156	-1.17911	0.275368	-4.28193	1.85276e-05	0.000175743	Fam81a				1373.66	0.945614	0.094483	10.0083	1.40131e-23	8.07105e-23	Foxq1
		719.326	-1.18119	0.278997	-4.23371	2.29868e-05	0.000212084	Armcx4				2151.67	0.944953	0.0753367	12.5431	4.33895e-36	3.83679e-35	Chchd10
		926.897	-1.18251	0.141886	-8.33421	7.8017e-17	4.17057e-15	Gm5643				441.796	0.944762	0.11396	8.29031	1.12957e-16	4.79292e-16	Ankrd1
		388.075	-1.18405	0.240387	-4.92558	8.41114e-07	1.05543e-05	Adssl1				15801.9	0.943002	0.0800461	11.7807	4.90639e-32	3.83787e-31	Loxl4
		1007.07	-1.18452	0.215331	-5.50093	3.77783e-08	6.10395e-07	Mybl2				310.132	0.94289	0.14647	6.43741	1.21531e-10	3.82873e-10	Ly96
		17106.7	-1.18564	0.227657	-5.20801	1.90882e-07	2.72851e-06	Nt5e				5703.72	0.941385	0.0516132	18.2392	2.52059e-74	4.96974e-73	Camk2d
		144.474	-1.18616	0.202643	-5.85346	4.81463e-09	9.03844e-08	Vash1				6456.59	0.941222	0.0639316	14.7223	4.6346e-49	5.65206e-48	BC006965
		2425.62	-1.18738	0.14778	-8.03475	9.37689e-16	4.49466e-14	Tnfaip8				4341.04	0.940942	0.0528881	17.7912	8.27076e-71	1.53852e-69	Mpc1
		23760.8	-1.1874	0.1969	-6.03049	1.63459e-09	3.21113e-08	Emp1				5167.14	0.939465	0.0668027	14.0633	6.38602e-45	7.08745e-44	Tex2
		2655.97	-1.18823	0.2277	-5.21839	1.80482e-07	2.59533e-06	Adarb1				142.214	0.938317	0.206487	4.54419	5.51463e-06	1.2705e-05	2310001H17Rik
		2638.49	-1.18859	0.209709	-5.66779	1.44655e-08	2.50921e-07	Krt79				3754.55	0.936662	0.0679649	13.7816	3.2905e-43	3.51603e-42	Hacd3
		69.1319	-1.19089	0.294948	-4.03764	5.39917e-05	0.00045061	Gm5803				75.7281	0.936334	0.258761	3.61853	0.000296279	0.000587517	Zfp457
		2092.76	-1.19386	0.107051	-11.1522	6.98221e-29	1.02453e-26	Sh2b2				6274.53	0.936233	0.0590808	15.8467	1.48243e-56	2.11873e-55	Hsd17b4
		1950.15	-1.1939	0.133049	-8.97333	2.87689e-19	1.98893e-17	Ddit4l				2105.57	0.935081	0.0647417	14.4433	2.76439e-47	3.25078e-46	Pqlc1
		17635.6	-1.19652	0.168686	-7.09318	1.31069e-12	4.13326e-11	Nfatc1				12515.6	0.933907	0.0698542	13.3694	9.13069e-41	9.14401e-40	Elovl6
		184.081	-1.19805	0.178233	-6.72182	1.79467e-11	4.8148e-10	Gm684				1340.66	0.933762	0.075266	12.4061	2.42018e-35	2.08635e-34	Pgm3
		132.199	-1.19953	0.239617	-5.00605	5.55582e-07	7.24979e-06	Fmnl1				328.631	0.932971	0.143484	6.50229	7.91084e-11	2.52294e-10	Egr2
		3313.9	-1.20219	0.127812	-9.40593	5.15698e-21	4.21349e-19	Tgfb3				888.675	0.932942	0.0884735	10.5449	5.36426e-26	3.40917e-25	Setd6
		207.776	-1.20403	0.191973	-6.27185	3.56788e-10	7.76189e-09	Icam1				32927.2	0.932615	0.0464645	20.0715	1.30894e-89	3.20498e-88	Tmbim6
		480.525	-1.20504	0.228679	-5.26959	1.36732e-07	2.02076e-06	Paqr7				6500.86	0.931987	0.0702446	13.2677	3.56165e-40	3.4894e-39	Azin1
		220.588	-1.20862	0.251822	-4.79949	1.59073e-06	1.89204e-05	Tube1				9425.77	0.931589	0.0527196	17.6706	7.06036e-70	1.28609e-68	Ppp1r15b
		21294.9	-1.21162	0.209027	-5.79648	6.77223e-09	1.24533e-07	Ero1l				5760.08	0.930683	0.052985	17.565	4.56552e-69	8.15647e-68	Ghr
		1075.26	-1.21222	0.172829	-7.01398	2.31628e-12	7.02704e-11	Chst2				1833.22	0.929938	0.0672708	13.8238	1.83137e-43	1.9662e-42	C87436
		18669.3	-1.22472	0.118559	-10.33	5.15414e-25	5.61489e-23	Angptl2				15313.8	0.929617	0.0538234	17.2716	7.69705e-67	1.32562e-65	Phldb2
		577.506	-1.2251	0.16424	-7.4592	8.70481e-14	3.16099e-12	Wdr62				770.083	0.928776	0.088567	10.4867	9.94349e-26	6.249e-25	Tmem62
		146.594	-1.22533	0.248184	-4.93718	7.92594e-07	1.00154e-05	Dnajc22				253.467	0.928037	0.142896	6.49448	8.33195e-11	2.65242e-10	Cmya5
		5337.12	-1.22836	0.127342	-9.64614	5.10394e-22	4.64523e-20	Cnnm4				1197.5	0.927304	0.10439	8.88307	6.50382e-19	3.05608e-18	Gjb3
		4519.36	-1.22911	0.253549	-4.84762	1.24951e-06	1.51373e-05	Ngef				9680.64	0.926973	0.0491023	18.8784	1.71674e-79	3.67876e-78	Nudt4
		853.957	-1.23026	0.194706	-6.31855	2.64026e-10	5.84107e-09	Tbc1d31				52507.1	0.926829	0.0647623	14.3112	1.86166e-46	2.14295e-45	Ddx3x
		6572.07	-1.23056	0.259349	-4.7448	2.08712e-06	2.43216e-05	Prkca				14258.8	0.925709	0.0539067	17.1724	4.27087e-66	7.22936e-65	Irx2
		2310.1	-1.23281	0.243365	-5.06568	4.06944e-07	5.47926e-06	Dbp				3844.43	0.92419	0.0581276	15.8993	6.40471e-57	9.19542e-56	Slc20a2
		46.1768	-1.23439	0.300208	-4.1118	3.92587e-05	0.000344429	Qpct				10191	0.924148	0.0903875	10.2243	1.54353e-24	9.22673e-24	Herc2
		12059.6	-1.23613	0.182597	-6.76975	1.29008e-11	3.58636e-10	Acsl3				179.338	0.923481	0.168628	5.47643	4.33997e-08	1.1627e-07	Rccd1
		1420.55	-1.23738	0.281782	-4.39127	1.12689e-05	0.000111067	Brca2				10374.2	0.921871	0.0610156	15.1088	1.41779e-51	1.82042e-50	Atp10d
		717.808	-1.2387	0.21354	-5.8008	6.59996e-09	1.2152e-07	Slc39a4				1101.33	0.921494	0.0790635	11.6551	2.16104e-31	1.64797e-30	Exosc1
		149.836	-1.24154	0.323599	-3.83667	0.000124712	0.00094937	Orc1				12952.8	0.920117	0.0565333	16.2757	1.46887e-59	2.21142e-58	Eif4a2
		657.406	-1.24199	0.145916	-8.51171	1.7138e-17	1.01836e-15	Rgs20				1694.64	0.919795	0.0743938	12.3639	4.09956e-35	3.52255e-34	Cox10
		4293.33	-1.24291	0.232296	-5.35052	8.77014e-08	1.33173e-06	S100a14				3132.36	0.919579	0.0601879	15.2785	1.06417e-52	1.40181e-51	Myd88
		5052.46	-1.24387	0.273418	-4.54932	5.38183e-06	5.70728e-05	Hspa4l				2602.67	0.919409	0.0683404	13.4534	2.94165e-41	3.00307e-40	Rrs1
		1955.7	-1.24472	0.240135	-5.18342	2.17853e-07	3.09558e-06	Uhrf1				430.429	0.919138	0.109748	8.37501	5.52193e-17	2.37429e-16	Srrm4
		15491.2	-1.24476	0.172462	-7.21758	5.29214e-13	1.75348e-11	Tns4				97.9857	0.918902	0.224225	4.09812	4.16514e-05	8.94723e-05	5430437J10Rik
		135.264	-1.24812	0.243826	-5.1189	3.07327e-07	4.24938e-06	Cd7				21394.8	0.917693	0.0715843	12.8198	1.27101e-37	1.17044e-36	Gpx4
		443.089	-1.24925	0.326805	-3.82261	0.000132049	0.000996257	Bard1				6385.98	0.91622	0.0496968	18.4362	6.73316e-76	1.35461e-74	Tspan9
		1836.26	-1.24986	0.231792	-5.39216	6.96157e-08	1.07527e-06	Ncaph				988.307	0.914529	0.0801738	11.4068	3.86537e-30	2.82358e-29	Nhlrc3
[truncated: 6,766 more rows]

## Sheet: 7. DE Zn-dependent gene list
Differentialy Expressed Zinc-dependent Genes		Up-regulated	Gene Name	log2FoldChange	P	Down-regulated	Gene Name	log2FoldChange	P		Differentialy Expressed Zinc-dependent Genes		Up-regulated	Gene Name	log2FoldChange	pvalue	Down-regulated		log2FoldChange	pvalue
[truncated: 270 more rows]

[truncated: 1 more sheets: 8. GO analysis of DE Zn-genes]
